# Supplementary material
Source: publisher figshare collection journal article supplement (https://acs.figshare.com/ndownloader/files/9599365)
Supplement: Supplementary file 1 [file 9599365]

## Sheet: human_Liver_NH4HCO3_1
Supplementary Table 1: The list of proteins identified from the four human tissues in this study
The proteins identified from the NH4HCO3 extraction of human liver
Group_ID	Protein_ID	Protein_Qscore	Protein_FDR	Protein_Mass	PeptideSeqs	PepIsUnique	Unique_Peptide_Num	Unique_Spectra_Num	Coverage	Peptide_Query	Sameset	Description
1592_1	sp|Q13190|STX5_HUMAN	28.2493	0	39647.8	APVSALPLAPNHLGGGAVVLGAESHASK;AVEIEELTYIIK;LASMSNDFK;NTDQGVYLGLSK;QNGIQTNKPALR;TSQQLQLIDEQDSYIQSR	1;1;1;1;1;1	6	7	0.2563	787219;372994;138233;298799;326371;326422;688219	-	Syntaxin-5 OS=Homo sapiens GN=STX5 PE=1 SV=2
5436_1	sp|P39656|OST48_HUMAN	67.9719	0	50769	DRGFELTFK;ELGSECGIEFDEEK;ETHSLFFR;GFELTFK;IDPFVR;LPDVYGVFQFK;NTLLIAGLQAR;SSLNPILFR;TADDPSLSLIK;TAVIDHHNYDISDLGQHTLIVADTENLLK;TLVLLDNLNVR;VGPVSHHR;WVFKEEGVLR;YSQTGNYELAVALSR;YSVQFK	1;1;1;1;1;1;1;1;1;1;1;1;1;1;1	15	46	0.3465	189956;490608;490607;490619;490606;149031;57683;57699;57693;57684;57704;57695;19775;309725;309723;309721;309720;309737;226666;226689;226674;226693;153555;153547;220212;220205;852032;852115;284743;284752;284753;284744;284747;284751;284745;284746;80072;80071;280415;280402;507178;507179;507192;507736;507147;29295	-	Dolichyl-diphosphooligosaccharide--protein glycosyltransferase 48 kDa subunit OS=Homo sapiens GN=DDOST PE=1 SV=4
6030_1	sp|Q8NEB9|PK3C3_HUMAN	20.1964	0.000204499	101485	HLDNLLLTK;QCYTAFLHLR;SGPSDHDLKPNAATR;TEDGGKYPVIFK	1;1;1;1	4	5	0.0519	164194;307374;451299;333677;333696	-	Phosphatidylinositol 3-kinase catalytic subunit type 3 OS=Homo sapiens GN=PIK3C3 PE=1 SV=1
7772_1	sp|Q9NXU5|ARL15_HUMAN	18.7981	0.000204499	22861.5	AVPFQNAILNVK;ELGGADNIRK;LCSESPDNVVSTTGFSIK;YFELEPLAR	1;1;1;1	4	5	0.2402	310463;166298;622856;206717;206734	-	ADP-ribosylation factor-like protein 15 OS=Homo sapiens GN=ARL15 PE=1 SV=1
6207_1	sp|Q9NXR7|BRE_HUMAN	30.9583	0	43523.8	ISPMLSPFISSVVR;NNWTGEFSAR;NYPYSPR;SGCTSLTPGPNCDR;TFVPQFQEAAFANGK;VGLDATNCLR;VQYVIQGYHK	1;1;1;1;1;1;1	7	11	0.2089	435057;435052;234061;83059;83062;83060;428489;498055;193598;264303;264289	-	BRCA1-A complex subunit BRE OS=Homo sapiens GN=BRE PE=1 SV=2
5125_1	sp|Q86VP3|PACS2_HUMAN	21.5243	0.000204499	97641.4	AAEIWIASLSSQPIDHEDSTMQAGPK;FFQLAAQWSSHVK;FIPFVGVVK;FLVIPLGSHPVAR;LFVEQLSHK;LQIMLQR;YCNCNSQPPTPVK	1;1;1;1;1;0;1	6	6	0.1012	808294;443319;135448;364386;182919;85648;450808	-	Phosphofurin acidic cluster sorting protein 2 OS=Homo sapiens GN=PACS2 PE=1 SV=3
3096_1	sp|P61201|CSN2_HUMAN	77.6919	0	51564.1	AALSSFQK;AHTDFFEAFK;ALYEQSLHIK;EHIEELLR;IDQVNQLLELDHQK;IDQVNQLLELDHQKR;LTNFPEMMNR;NYDESGSPR;QLLTYIR;SAIPHPLIMGVIR;SGINPFDSQEAKPYK;SINSILDYISTSK;TNHSNIMDDPFIR;VLELEGEKGEWGFK;YLVLANMLMK;YTALDKWTNQLNSLNQAVVSK	1;1;1;1;1;1;1;1;1;1;1;1;1;1;1;1	16	33	0.3973	63079;252905;252910;252911;252903;252919;252908;246197;149720;517890;587846;587835;275198;283711;283713;143775;88602;362824;362825;362829;511835;511833;511840;383844;448472;448479;456437;449460;479843;479855;242876;746833;747052	-	COP9 signalosome complex subunit 2 OS=Homo sapiens GN=COPS2 PE=1 SV=1
6675_1	sp|P05156|CFAI_HUMAN	33.9293	0	65706.6	AQLGDLPWQVAIK;GLETSLAECTFTK;HGNTDSEGIVEVK;KYTHLSCDK;SLECLHPGTK;TMGYQDFADVVCYTQK;VFSLQWGEVK	1;1;1;1;1;1;1	7	12	0.1441	382820;382825;382819;392818;351874;215076;215081;208714;208709;617638;241109;241113	-	Complement factor I OS=Homo sapiens GN=CFI PE=1 SV=2
1329_1	sp|O00399|DCTN6_HUMAN	20.7895	0.000204499	20733.6	IAPGAVVCVESEIR;ILPNYHHLK;MGDNNVIESK;VQTERPQPQTLQLDFLMK	1;1;1;1	4	8	0.2684	416440;416437;205041;205044;186367;693507;693514;698501	-	Dynactin subunit 6 OS=Homo sapiens GN=DCTN6 PE=1 SV=1
8295_1	sp|Q8IVP5|FUND1_HUMAN	6.11616	0.00351617	17166.8	VFGHSSGPMVEK	1	1	5	0.0774	287147;287138;287145;296427;287139	-	FUN14 domain-containing protein 1 OS=Homo sapiens GN=FUNDC1 PE=1 SV=1
2998_1	sp|Q8NBZ7|UXS1_HUMAN	12.2297	0.000204499	47546.7	AIHYFR;ILITGGAGFVGSHLTDK;NVEHWIGHENFELINHDVVEPLYIEVDQIYHLASPASPPNYMYNPIK	1;1;1	3	3	0.1667	42654;514648;893651	-	UDP-glucuronic acid decarboxylase 1 OS=Homo sapiens GN=UXS1 PE=1 SV=1
2812_1	sp|Q9BRJ6|CG050_HUMAN	11.3753	0.000204499	22069.8	EAGLVAQHPPAR;GEAVLRPGLDAEPELSPEEQR;SGAELALDYLCR	1;1;1	3	4	0.232	271268;271322;724677;342051	-	Uncharacterized protein C7orf50 OS=Homo sapiens GN=C7orf50 PE=1 SV=1
568_1	sp|Q96A33|CCD47_HUMAN	61.8372	0	55838.3	ARVEENFLK;ELLESNFTLVGDDGTNKEATSTGK;EMQDLSEFCSDKPK;IESVHFSDQFSGPK;IMQEEGQPLKLPDTK;LAQAWFNTHR;LTHVQR;MMRPVSDQVQIK;MVHFLTHYADK;QDLLNVLAR;RQDLLNVLAR;TLLFTFNVPGSGNTYPK;VTMNDEDMDTYVFAVGTR	1;1;1;1;1;1;1;1;1;1;1;1;1	13	20	0.3313	186088;771018;527915;457536;534770;269850;269875;269857;269861;22277;378785;338606;150856;244141;244140;244137;244136;244142;590432;663402	-	Coiled-coil domain-containing protein 47 OS=Homo sapiens GN=CCDC47 PE=1 SV=1
2450_1	sp|Q9Y3S2|ZN330_HUMAN	10.6454	0.000204499	36177.3	AFCYFCNSVQK;CLSTHACACPLTDAECVECER;LPICAQCGK	1;1;1	3	5	0.1281	374391;374380;374392;773378;152982	-	Zinc finger protein 330 OS=Homo sapiens GN=ZNF330 PE=1 SV=1
2683_1	sp|Q8WXE0|CSKI2_HUMAN	32.5112	0	126705	GREQDLILAVK;MTPEDLTAIGVTKPGHR;NTYNQTALDIVNQFTTSQASR;SGEQIFTQDVRPEQLLEGK;TGTALHEAALYGK;TPQPPAEEPPHPLTYSQLPR;TSPSVTPTPAR	1;1;1;1;1;1;1	7	13	0.0932	268897;268909;577651;742904;742739;742724;694248;693983;321673;321656;715417;190561;190498	-	Caskin-2 OS=Homo sapiens GN=CASKIN2 PE=1 SV=2
2083_1	sp|P05106|ITB3_HUMAN	13.184	0.000204499	87000.4	HVLTLTDQVTR;NDASHLLVFTTDAK;VLEDRPLSDKGSGDSSQVTQVSPQR	1;1;1	3	5	0.0635	292259;434159;434144;434145;795768	-	Integrin beta-3 OS=Homo sapiens GN=ITGB3 PE=1 SV=2
4287_1	sp|P01024|CO3_HUMAN	423.785	0	187030	AAVYHHFISDGVR;AAVYHHFISDGVRK;ACEPGVDYVYK;ADIGCTPGSGK;ADIGCTPGSGKDYAGVFSDAGLTFTSSSGQQTAQR;AELQCPQPAAR;AGDFLEANYMNLQR;AKDQLTCNK;APSTWLTAYVVK;APSTWLTAYVVKVFSLAVNLIAIDSQVLCGAVK;AVLYNYR;AYYENSPQQVFSTEFEVK;CAEENCFIQK;DAPDHQELNLDVSLQLPSR;DFDFVPPVVR;DICEEQVNSLPGSITK;DQLTCNKFDLK;DSCVGSLVVK;DTWVEHWPEEDECQDEENQK;DYAGVFSDAGLTFTSSSGQQTAQR;EDIPPADLSDQVPDTESETR;EGVQKEDIPPADLSDQVPDTESETR;EYVLPSFEVIVEPTEK;FISLGEA…	1;1;1;1;1;1;1;1;1;1;1;1;1;1;1;1;1;1;1;1;1;1;1;1;1;1;1;1;1;1;1;1;1;1;1;1;1;1;1;1;1;1;1;1;1;1;1;1;1;1;1;1;1;1;1;1;1;1;1;1;1;1;1;1;1;1;1;1;1;1;1;1;1;1;1;1;1;1;1;1;1;1;1;1;1;1;1;1;1	89	401	0.5797	401265;401261;401260;401262;469881;469877;469862;302461;302455;161881;868338;868457;267854;490699;490702;490696;490698;490695;490697;499179;490716;168565;323904;323902;868157;868207;83729;691361;691351;691354;691395;691359;691348;691394;691648;691403;691680;301070;686571;686564;239736;239734;239747;239743;239731;239735;239739;239757;563424;563413;564438;350086;350083;350062;162493;162496;784716;7…	-	Complement C3 OS=Homo sapiens GN=C3 PE=1 SV=2
4204_1	sp|Q07955|SRSF1_HUMAN	76.6649	0	27727.8	DAEDAVYGR;DGTGVVEFVR;DGTGVVEFVRK;DGYDYDGYR;DIEDVFYK;EAGDVCYADVYR;GGPPFAFVEFEDPR;GGPPFAFVEFEDPRDAEDAVYGR;IYVGNLPPDIR;KEDMTYAVR;RGGPPFAFVEFEDPR;SHEGETAYIR;TKDIEDVFYK;VKVDGPR;VVVSGLPPSGSWQDLK;VVVSGLPPSGSWQDLKDHMR	1;1;1;1;1;1;1;1;1;1;1;1;1;1;1;1	16	76	0.4919	129882;169087;169066;249363;196568;145707;370673;370668;370675;370674;370684;450869;450872;450878;773740;773727;773729;773724;773722;773723;773749;277448;277440;277454;277437;277456;277430;277458;277438;277445;277439;277444;277426;277427;277449;277420;277443;277447;277413;277432;277428;277425;277455;277452;277433;189889;189894;532068;532046;532031;532045;221846;221845;221842;277677;277680;277685;…	-	Serine/arginine-rich splicing factor 1 OS=Homo sapiens GN=SRSF1 PE=1 SV=2
1871_1	sp|Q96I15|SCLY_HUMAN	72.3346	0	48118.6	AAELVTQNCEAYEAHMR;AMWEAWGNPSSPYSAGR;DAPAPAASQPSGCGK;GAKPHFITSSVEHDSIR;HFHANQTSK;IGALYIR;IHLNSQFPGTQR;LEAEFGQK;LPNTCNFSIR;LQGHVVLAQCR;LVTIMLANNETGIVMPVPEISQR;MIGGKPQDIIFTSGGTESNNLVIHSVVK;NFRPGTENTPMIAGLGK;QAVAQLEDQA;VAAGLPPILVHTDAAQALGK;VSGQAEVDDILAAVRPTTR	1;1;1;1;1;1;1;1;1;1;1;1;1;1;1;1	16	42	0.5393	640919;640930;601065;368688;600488;600494;165130;165131;165129;165124;165127;42449;42450;359170;359157;94691;257795;257793;291305;291306;291302;291304;770908;826470;828002;827917;826336;826335;828078;828181;569108;569111;569107;569104;166223;623447;623443;623444;623445;623830;642564;642574	-	Selenocysteine lyase OS=Homo sapiens GN=SCLY PE=1 SV=4
3628_1	sp|O60306|AQR_HUMAN	57.5946	0	171186	ENVPAWEIFK;FISVLK;FQGQQNDYILLSLVR;FRENVPAWEIFK;GCEIQGMLDDKGR;GPYPYNQPK;IFTQLEEFR;ISQIQQLNQMPLYPTEK;ITFPVR;NFNLFR;RNTIQFTHTQIEAIR;TLIVEPHVIPNR;TLIVTHSNQALNQLFEK;VGVPTVDLDAQGR;VIEDGPEPRPNLR;VTVEDPALQIPPFR	1;1;1;1;1;1;1;1;1;1;1;1;1;1;1;1	16	19	0.1192	263011;3941;565589;436533;405937;162410;235054;653419;15352;43943;579359;579360;579356;579672;353660;628587;318729;412215;459819	-	Intron-binding protein aquarius OS=Homo sapiens GN=AQR PE=1 SV=4
4434_1	sp|Q9UJJ9|GNPTG_HUMAN	6.11616	0.00351617	33952.2	RDPSPVSGPVHLFR	1	1	1	0.0459	450636	-	N-acetylglucosamine-1-phosphotransferase subunit gamma OS=Homo sapiens GN=GNPTG PE=1 SV=1
4972_1	sp|P46020|KPB1_HUMAN	23.2411	0.000204499	137225	CHGLSVEGFVLPSSTTR;EFGVER;GDKTNQGISELNASSVGMAK;ILSHIYSSLGCNNR;NLLHHILSGK;TNQGISELNASSVGMAK;YISGILR;YLDHLLAHTAPHPK	1;0;1;1;0;1;1;1	6	6	0.072	586813;16480;645686;486616;202757;202761;203583;524843;49166;475867	-	Phosphorylase b kinase regulatory subunit alpha, skeletal muscle isoform OS=Homo sapiens GN=PHKA1 PE=1 SV=2
4972_2	sp|P46019|KPB2_HUMAN	107.906	0	138320	AALEAIDELDLFGAHGGR;AALEAIDELDLFGAHGGRK;EALEGILIR;EFGVER;FAVHVESVLNR;FSADEQFFSVGQAASSSAHSSK;GLLQCMMR;HGVNVQSIADIHPIQVQPGR;HIGVLGTSK;HVFSAIHSTR;IISAPLPPEELTK;ILSHIYAK;KLEDGYFGGAR;KVEVLAEACTDLLSHQK;LHYDPAELK;LVQQTILCYQNPVTGLLSASHEQK;NLLHHILSGK;SLNCSGEEASESLMNLSPFDMK;SLNLVDSPQPLLEK;SVRPIHSSTSSPTISIHEVGHTGVTK;TMLTNDGSDIHSAVLSTIR;TNQGIPELNASSVGMAK;VPESDFQWPR;VPVGFYQR	1;1;1;0;1;1;1;1;1;1;1;1;1;1;1;1;0;1;1;1;1;1;1;1	22	53	0.2607	589839;589855;637716;637708;637707;637701;138930;138926;138928;16480;285108;285109;720519;136496;691243;90689;90686;217116;217119;217118;217107;217111;217130;365552;365556;365554;365555;365557;104955;252996;252994;253004;253003;252993;253005;252997;622956;622958;173252;800704;800701;800888;801120;202757;202761;203583;756112;445214;799104;799107;799106;653031;653343;530178;279212;279223;115735	-	Phosphorylase b kinase regulatory subunit alpha, liver isoform OS=Homo sapiens GN=PHKA2 PE=1 SV=1
5931_1	sp|Q7L1W4|LRC8D_HUMAN	11.1952	0.000204499	98138.2	LESLPVAVFSLQK;VEQTAFSFLR;VPSNITDVAPHLTK	1;1;1	3	3	0.0431	378335;243823;412252	-	Volume-regulated anion channel subunit LRRC8D OS=Homo sapiens GN=LRRC8D PE=1 SV=1
1907_1	sp|P36954|RPB9_HUMAN	12.5562	0.000204499	14513.6	EAVFFQSHSAR;FCQECNNMLYPK;LYYVCTAPHCGHR	1;1;1	3	7	0.288	289797;289800;290531;289798;471270;486462;486464	-	DNA-directed RNA polymerase II subunit RPB9 OS=Homo sapiens GN=POLR2I PE=1 SV=1
2959_1	sp|P81605|DCD_HUMAN	19.3593	0.000204499	11276.8	DAVEDLESVGK;ENAGEDPGLAR;GAVHDVKDVLDSVL;LGKDAVEDLESVGK	1;1;1;1	4	5	0.3545	221098;200176;200170;398765;394722	-	Dermcidin OS=Homo sapiens GN=DCD PE=1 SV=2
8136_1	sp|Q9P2P5|HECW2_HUMAN	5.57686	0.00504172	175660	AFFVDHNSR;EFFFLVSR	1;1	2	2	0.0108	177944;152137	-	E3 ubiquitin-protein ligase HECW2 OS=Homo sapiens GN=HECW2 PE=1 SV=2
3863_1	sp|Q13586|STIM1_HUMAN	51.8834	0	77375.3	AEQSLHDLQER;ALDTVLFGPPLLTR;ALLALNHGLDK;ELESHSSWYAPEALQK;IDKPLCHSEDEK;LISVEDLWK;LQLSGHAMPR;LRDEINLAK;LSFEAVR;LTEPQHGLGSQR;NTLFGTFHVAHSSSLDDVDHK;YAEEELEQVR	1;1;1;1;1;1;1;1;1;1;1;1	12	21	0.2073	317711;423767;223802;223803;598058;598040;400719;400713;184228;184232;184229;188494;188503;166076;166077;49021;316306;316312;732544;732542;281704	-	Stromal interaction molecule 1 OS=Homo sapiens GN=STIM1 PE=1 SV=3
2659_1	sp|P01023|A2MG_HUMAN	267.834	0	163188	AAQVTIQSSGTFSSK;AIGYLNTGYQR;ALLAYAFALAGNQDK;ALLAYAFALAGNQDKR;ATVLNYLPK;AYIFIDEAHITQALIWLSQR;DLKPAIVK;DMYSFLEDMGLK;DNSVHWERPQKPK;DTVIKPLLVEPEGLEK;EQAPHCICANGR;ETTFNSLLCPSGGEVSEELSLK;FEVQVTVPK;FSGQLNSHGCFYQQVK;GEAFTLK;GGVEDEVTLSAYITIALLEIPLTVTHPVVR;GHFSISIPVK;GVPIPNK;HNVYINGITYTPVSSTNEK;HYDGSYSTFGER;IAQWQSFQLEGGLK;KDTVIKPLLVEPEGLEK;LHTEAQIQEEGTVVELTGR;LLIYAVLPTGDVIGDSAK;LLLQQVSLPELPGEYSMK;LPPNVVEES…	1;1;1;1;1;1;1;1;1;1;1;1;1;1;1;1;1;1;1;1;1;1;1;1;1;1;1;1;1;1;1;1;1;1;1;1;1;1;1;1;1;1;1;1;1;1;1;1;1;1;1;1;1	53	176	0.4898	423122;423120;276834;276769;276759;276820;451437;451385;532573;141546;141543;141544;141540;141549;745934;745933;78485;388384;388381;479842;479836;479854;479840;479852;479857;559293;559296;559299;559298;367994;368000;747589;153512;607252;607245;607221;27373;848777;848779;172725;172736;172730;172741;172751;172767;172748;172749;172732;172718;172734;11524;683918;684093;683917;684100;684340;684343;684…	-	Alpha-2-macroglobulin OS=Homo sapiens GN=A2M PE=1 SV=3
5037_1	sp|Q8N183|MIMIT_HUMAN	7.90762	0.000581846	19844.1	GHASAPYFGKEEPSVAPSSTGK;YYYIPQYK	1;1	2	2	0.1775	701954;206515	-	Mimitin, mitochondrial OS=Homo sapiens GN=NDUFAF2 PE=1 SV=1
7475_1	sp|O15379|HDAC3_HUMAN	13.7633	0.000204499	48816.4	FHSEDYIDFLQR;QTIFENLK;YTGASLQGATQLNNK	1;1;1	3	3	0.0818	453257;128611;451337	-	Histone deacetylase 3 OS=Homo sapiens GN=HDAC3 PE=1 SV=2
2997_1	sp|O15504|NUPL2_HUMAN	12.5705	0.000204499	44844	DQEKPYFSSFDSGASTNRK;LEYHNFLTSNNLQSYLNSVQR;LLEGIVK;VALLSDVK	1;1;1;1	4	4	0.13	690775;773785;29541;59468	-	Nucleoporin-like protein 2 OS=Homo sapiens GN=NUPL2 PE=1 SV=1
2277_1	sp|Q9Y316|MEMO1_HUMAN	43.6818	0	33711.5	AIIAPHAGYTYCGSCAAHAYK;CALSSVDIYR;IFILGPSHHVPLSR;IYGELWK;MSLQTDEDEHSIEMHLPYTAK;NWQDSSVSYAAGALTVH;TGMFER;YHNTICGR;YSYYDESQGEIYR	1;1;1;1;1;1;1;1;1	9	30	0.3939	722003;235380;235392;235387;455296;455283;455288;455285;455294;455297;455290;455287;455293;455284;455286;455291;455289;89321;761367;761631;761632;761369;570525;570533;570906;570524;17528;17527;142166;507536	-	Protein MEMO1 OS=Homo sapiens GN=MEMO1 PE=1 SV=1
2155_1	sp|P02776|PLF4_HUMAN	23.4284	0.000204499	10837.9	AGPHCPTAQLIATLK;HITSLEVIK;ICLDLQAPLYK;KICLDLQAPLYK;TTSQVRPR	1;1;1;1;1	5	15	0.4356	457839;457823;457829;457824;457842;457819;457833;457825;150123;322786;396035;396036;104768;104766;104767	-	Platelet factor 4 OS=Homo sapiens GN=PF4 PE=1 SV=2
1169_1	sp|O75177|CREST_HUMAN	8.21856	0.00039093	42963.6	GKGEVTQQTIQK;TAECTQYQQILHR	1;1	2	4	0.0631	312324;493754;493750;493759	-	Calcium-responsive transactivator OS=Homo sapiens GN=SS18L1 PE=1 SV=2
3035_1	sp|P25789|PSA4_HUMAN	43.1989	0	29465.2	ATCIGNNSAAAVSMLK;EGEMTLK;HYGFQLYQSDPSGNYGGWK;LLDEVFFSEK;LSAEKVEIATLTR;QAYTQFGGK;SALALAIK;TTIFSPEGR;VEIATLTR	1;1;1;1;1;1;1;1;1	9	17	0.3487	473149;481767;473684;481298;481752;42868;702167;259934;378334;132052;34786;34794;34785;34770;136031;86340;86332	-	Proteasome subunit alpha type-4 OS=Homo sapiens GN=PSMA4 PE=1 SV=1
2911_1	sp|P55263|ADK_HUMAN	102.766	0	40519.7	AAEAHVDAHYYEQNEQPTGTCAACITGDNR;AATFFGCIGIDK;AGHYAASIIIR;ELFDELVK;ELFDELVKK;FGEILK;FGEILKR;FKVEYHAGGSTQNSIK;HKELFDELVK;HLDLEK;IVIFTQGR;KAAEAHVDAHYYEQNEQPTGTCAACITGDNR;LKVEAPQALR;NWMLVEK;RTGCTFPEKPDFH;SLIANLAAANCYK;TGCTFPEKPDFH;VAHHASENNR;VAQWMIQQPHK;VEYHAGGSTQNSIK;YSLKPNDQILAEDK;YSLKPNDQILAEDKHK	1;1;1;1;1;1;1;1;1;1;1;1;1;1;1;1;1;1;1;1;1;1	22	91	0.4972	858986;858992;859068;858928;858988;859069;858926;858990;858929;859070;301788;301779;301785;301839;301789;228258;228255;228241;128589;194990;194989;194997;194996;194994;194993;194992;3825;3808;68165;553218;553216;553240;553210;553209;553223;553208;277814;277810;277767;22536;100098;100101;100097;100102;865633;865700;865763;865578;865699;865632;865565;197785;94122;94124;100735;464788;464790;464789;3…	-	Adenosine kinase OS=Homo sapiens GN=ADK PE=1 SV=2
4863_2	sp|Q9Y490|TLN1_HUMAN	603.007	0	269599	AAAFEEQENETVVVK;AAGHPGDPESQQR;AAMEPIVISAK;ACEFAGFQCQIQFGPHNEQK;ADAEGESDLENSR;ADAEGESDLENSRK;ADQDSEAMK;AEASQLGHK;AGALQCSPSDAYTK;AGALQCSPSDAYTKK;AGFLDLK;AHATGAGPAGR;AIADMLR;AIAVTVQEMVTK;ALAVNPR;ALDGAFTEENR;ALDYYMLR;ALEATTEHIR;ALGDLISATK;ALHYGR;ALSTDPAAPNLK;ANQAIQMACQSLGEPGCTQAQVLSAATIVAK;APGQLECETAIAALNSCLR;AQEACGPLEMDSALSVVQNLEK;AQVVSNLK;ASAGPQPLLVQSCK;ASSLIEEAK;ASSLIEEAKK;ASVPTIQDQASAMQLSQCAK;AVA…	1;1;1;1;1;1;1;1;1;1;1;1;1;1;1;1;1;1;1;1;1;1;1;1;1;1;1;1;1;0;1;1;1;1;1;1;1;1;1;1;1;1;0;1;1;1;1;0;1;0;1;1;0;0;1;1;1;1;0;1;1;1;1;1;1;1;1;1;1;1;1;1;0;1;1;1;1;1;1;1;1;1;1;0;1;1;1;1;1;1;1;1;1;0;1;1;1;0;1;1;1;1;0;1;1;1;1;1;1;1;1;1;1;1;1;1;1;1;1;0;1;1;1;1;1;1;1;0;1;1;1;1	118	715	0.6116	503155;502742;502713;502730;502689;503224;502663;502640;502697;503209;502670;502716;502671;502660;502692;502699;502676;502703;502656;502684;502685;502672;503202;502759;502683;331145;331147;331148;201339;211072;201344;211111;747321;747557;747324;747549;747326;356095;356094;356096;428070;428066;129219;102780;399619;399611;399617;399603;467875;467893;467894;467904;26809;26806;26811;26800;115720;1157…	-	Talin-1 OS=Homo sapiens GN=TLN1 PE=1 SV=3
2014_1	sp|Q9Y266|NUDC_HUMAN	77.0778	0	38219.1	DAENHEAQLK;DMVVDIQR;ELTDEEAER;GQPAIIDGELYNEVK;KDAENHEAQLK;LITQTFSHHNQLAQK;LKPNLGNGADLPNYR;LQLEIDQK;LQLEIDQKK;LVSSDPEINTK;LVSSDPEINTKK;SMGLPTSDEQK;TDFFIGGEEGMAEK;VEESSWLIEDGK;VEESSWLIEDGKVVTVHLEK;VVTVHLEK	1;1;1;1;1;1;1;1;1;1;1;1;1;1;1;1	16	31	0.4169	216963;216959;120100;177337;492933;292000;553307;553331;553330;553308;553319;553324;553320;490943;490928;490944;491384;491395;490942;125345;191242;246802;246798;321300;240842;433233;441941;355461;725975;95861;95860	-	Nuclear migration protein nudC OS=Homo sapiens GN=NUDC PE=1 SV=1
6771_1	sp|Q9HAU5|RENT2_HUMAN	11.8691	0.000204499	147717	AFVPAILFK;NFYENLIDLK;QQPFQNLLK	1;1;1	3	3	0.022	135450;283825;191741	-	Regulator of nonsense transcripts 2 OS=Homo sapiens GN=UPF2 PE=1 SV=1
5537_1	sp|P08195|4F2_HUMAN	35.5272	0	67951.7	EDFDSLLQSAK;GENSWFSTQVDTVATK;GLVLGPIHK;IGDLQAFQGHGAGNLAGLK;LKLEPHEGLLLR;VAEDEAEAAAAAK;VILDLTPNYR	1;1;1;1;1;1;1	7	10	0.1429	275235;554759;554748;100129;594830;594835;371293;271086;247741;247751	-	4F2 cell-surface antigen heavy chain OS=Homo sapiens GN=SLC3A2 PE=1 SV=3
7221_1	sp|Q8N9V3|WSDU1_HUMAN	5.07477	0.00789293	52782.9	ESLADDLKIESLGLR	1	1	1	0.0315	500208	-	WD repeat, SAM and U-box domain-containing protein 1 OS=Homo sapiens GN=WDSUB1 PE=1 SV=3
1522_1	sp|Q9H115|SNAB_HUMAN	19.3817	0.000204499	33535.5	AALCHFIVDELNAK;AIAHYEQSADYYK;AIAHYEQSADYYKGEESNSSANK;DYFFK;LDQWLTTMLLR;LLEAHEEQNSEAYTEAVKEFDSISR;NWSAAGNAFCQAAK;SIQGDGEGDGDLK;YSAKDYFFK	1;0;0;0;0;1;1;1;0	4	6	0.3658	470300;470277;447992;448004;447990;448014;778016;778013;778018;778144;777815;777812;778136;778015;777819;777821;778019;778017;777827;9440;9437;364253;364251;821458;413970;414529;296363;225669;225672;225671	-	Beta-soluble NSF attachment protein OS=Homo sapiens GN=NAPB PE=1 SV=2
646_1	sp|P62699|YPEL5_HUMAN	12.5586	0.000204499	13832.8	AFLFNK;IFLDHIGGTR;LFSCANCDTILTNR	1;1;1	3	3	0.2479	17375;200422;513732	-	Protein yippee-like 5 OS=Homo sapiens GN=YPEL5 PE=1 SV=1
1241_1	sp|Q5VTQ0|TT39B_HUMAN	16.9063	0.000204499	76906.5	ATYVFLK;ELGLLQLR;NLQRPLQAELCYNHVVESEK;YSASLPAPVK	1;1;1;1	4	4	0.066	57771;103388;753128;147858	-	Tetratricopeptide repeat protein 39B OS=Homo sapiens GN=TTC39B PE=1 SV=4
1244_1	sp|P07355|ANXA2_HUMAN	99.7454	0	38579.8	AEDGSVIDYELIDQDAR;AYTNFDAER;AYTNFDAERDALNIETAIK;DIISDTSGDFRK;DLYDAGVK;DLYDAGVKR;GLGTDEDSLIEIICSR;GVDEVTIVNILTNR;LMVALAK;LSLEGDHSTPPSAYGSVK;LYDSMK;QDIAFAYQR;RAEDGSVIDYELIDQDAR;SEVDMLK;SLYYYIQQDTK;SYSPYDMLESIR;SYSPYDMLESIRK;TKGVDEVTIVNILTNR;TNQELQEINR;TPAQYDASELK;WISIMTER	1;1;1;1;1;1;1;1;1;1;1;1;1;1;1;1;1;1;1;1;1	21	49	0.5605	611186;611181;611173;611610;173861;173864;688469;688470;688468;333575;77080;149068;558348;558342;440353;440358;440351;440354;440341;19431;19428;586067;586068;586072;586060;23017;23015;189427;663704;663710;663717;663706;663736;663741;663998;664005;663985;663988;48897;373263;373268;395076;395073;463088;463071;555837;270565;258222;148736	-	Annexin A2 OS=Homo sapiens GN=ANXA2 PE=1 SV=2
1796_1	sp|P07360|CO8G_HUMAN	38.9625	0	22263.5	AEATTLHVAPQGTAMAVSTFR;AGQLSVK;FLQEQGHR;KLDGICWQVR;QLYGDTGVLGR;SLPVSDSVLSGFEQR;VQEAHLTEDQIFYFPK;YGFCEAADQFHVLDEVRR	1;1;1;1;1;1;1;1	8	19	0.5248	689600;689845;694483;694482;2470;139202;287329;232441;232426;479826;479832;479839;632214;632215;632536;632216;632224;704186;704178	-	Complement component C8 gamma chain OS=Homo sapiens GN=C8G PE=1 SV=3
3794_2	sp|Q8N6H7|ARFG2_HUMAN	26.1376	0.000204499	56685.1	AAQMYR;CMQVGGNANATAFFR;EVDAEYEAR;QLGSAALAR;SLGVHLSFIR;SQLDLFDDVGTFASGPPK;YKDNPFSLGESFGSR	1;1;1;1;0;1;1	6	8	0.1574	17283;492157;170809;79395;200520;200523;200516;200526;605369;605359;605360;523332	-	ADP-ribosylation factor GTPase-activating protein 2 OS=Homo sapiens GN=ARFGAP2 PE=1 SV=1
3794_1	sp|Q9NP61|ARFG3_HUMAN	14.8972	0.000204499	56893	AAQLYR;LSASSSISSADLFEEPR;LSVFANGVVTSIQDR;SLGVHLSFIR	1;1;1;0	3	3	0.093	10216;566207;472907;200520;200523;200516;200526	-	ADP-ribosylation factor GTPase-activating protein 3 OS=Homo sapiens GN=ARFGAP3 PE=1 SV=1
3694_1	sp|Q15126|PMVK_HUMAN	65.3879	0	21981.2	DFVTEALQSR;EAYGAVTQTVR;EQYAQEHGLNFQR;IVEGISQPIWLVSDTR;IVEGISQPIWLVSDTRR;KIVEGISQPIWLVSDTR;LGADVCAVLR;LLDTSTYK;LSGPLKEQYAQEHGLNFQR;LVLLFSGK;QADPGFFCR;RVSDIQWFR;SGKDFVTEALQSR;VVALEQSR	1;1;1;1;1;1;1;1;1;1;1;1;1;1	14	47	0.5833	224093;224101;242298;242300;479115;479652;573576;573580;573572;573581;573577;573574;573575;633456;633462;623075;623069;623071;166741;102807;102809;102810;102802;102811;705604;705289;705291;75535;75539;75540;75541;75542;75538;75536;75534;75537;180889;180885;180882;180891;249335;249336;382048;85586;85582;85580;85581	-	Phosphomevalonate kinase OS=Homo sapiens GN=PMVK PE=1 SV=3
7791_1	sp|P15428|PGDH_HUMAN	55.3396	0	28958.8	AFAEALLLK;GIHFQDYDTTPFQAK;HGIVGFTR;KVVDHFGR;LDILVNNAGVNNEK;LDILVNNAGVNNEKNWEK;SAALAANLMNSGVR;TLFIQCDVADQQQLR;VALVDWNLEAGVQCK;VALVTGAAQGIGR;VVDHFGR	1;1;1;1;1;1;1;1;1;1;1	11	39	0.4323	120545;120542;553948;553947;79335;79343;79350;111585;423636;423633;423642;424150;665183;665178;665177;665168;345938;345934;355097;355125;345927;345936;345937;355110;345942;345943;345930;582365;582366;582775;583255;522456;253241;253240;253244;253238;52085;52087;52069	-	15-hydroxyprostaglandin dehydrogenase [NAD(+)] OS=Homo sapiens GN=HPGD PE=1 SV=1
7267_1	sp|P27824|CALX_HUMAN	109.783	0	67525.8	AEEDEILNR;APVPTGEVYFADSFDR;CESAPGCGVWQRPVIDNPNYK;EIEDPEDR;EIEDPEDRKPEDWDERPK;GTLSGWILSK;HHAISAK;IPDPEAVKPDDWDEDAPAK;IPNPDFFEDLEPFR;IVDDWANDGWGLK;IVDDWANDGWGLKK;KDDTDDEIAK;KIPNPDFFEDLEPFR;KPEDWDERPK;LHFIFR;RIVDDWANDGWGLK;RPDADLK;SDAEEDGGTVSQEEEDRKPK;TGIYEEK;TPELNLDQFHDK;TPELNLDQFHDKTPYTIMFGPDK;TPYTIMFGPDK;TYFTDKK;YDGKWEVEEMK	1;1;1;1;1;1;1;1;1;1;1;1;1;1;1;1;1;1;1;1;1;1;1;1	24	78	0.3733	175522;175526;555151;555124;555129;555127;555139;555132;555134;555145;555144;555103;555133;555126;555136;555135;555143;555137;555131;555117;555123;756289;756291;756474;133400;133399;722364;722373;161762;161757;161752;161763;161740;161760;161764;26743;26751;675959;675952;539441;410302;410309;410310;477804;477797;477802;213217;593454;593462;593461;301774;54124;54119;54121;54122;54123;54126;492345;4…	-	Calnexin OS=Homo sapiens GN=CANX PE=1 SV=2
6557_1	sp|Q9NXG2|THUM1_HUMAN	51.4077	0	39290.8	AFLEDMKK;AVCCLSVVK;DYMLFR;ELAGIVCTLNSENK;FQSVESGANNVVFIR;GTFQIVYK;KYNLQEVVK;LESADKSDQNNTAEGK;LVHHILQDMYK;MLPISGTCK;QLEPGLQGILITCNMNER;SPKDPSQLNSK;YAETFLEPWFK;YNLQEVVK	1;1;1;1;1;1;1;1;1;1;1;1;1;1	14	25	0.4108	123146;148770;59070;442617;504159;504160;504174;504139;504161;110527;110583;195017;195026;524758;358656;368416;358648;368431;135580;143017;670400;245591;378052;128608;128625	-	THUMP domain-containing protein 1 OS=Homo sapiens GN=THUMPD1 PE=1 SV=2
8076_1	sp|O43566|RGS14_HUMAN	18.8135	0.000204499	61409	AQQLQIFNLMK;EFSAENVTFWK;FQQIPASDTQQLAQEAR;QAWLGEEVLAEPRPDMFR	1;1;1;1	4	5	0.1007	322847;336021;619583;620391;685841	-	Regulator of G-protein signaling 14 OS=Homo sapiens GN=RGS14 PE=1 SV=4
4965_1	sp|P51649|SSDH_HUMAN	123.736	0	57178.3	AAYEAFCR;AFAEAMK;AFAEAMKK;EGSKYGIDEYLELK;EVGEAICTDPLVSK;GATVVTGGK;GIHDAFVK;IITAESGKPLK;ILLHHAANSVK;ILLHHAANSVKR;ISFTGSTTTGK;LAGLSAALLR;NTGQTCVCSNQFLVQR;QPIGVAAVITPWNFPSAMITR;QVNDAVSK;RVYGDIIHTPAK;TDSFVGGR;VAEQLEVGMVGVNEGLISSVECPFGGVK;VGNGFEEGTTQGPLINEK;VYGDIIHTPAK;VYGDIIHTPAKDR;WLPAAATFPVQDPASGAALGMVADCGVR;WYNLMIQNKDDLAR;YGIDEYLELK	1;1;1;1;1;1;1;1;1;1;1;1;1;1;1;1;1;1;1;1;1;1;1;1	24	346	0.486	125516;125526;125515;125522;125524;125513;125518;125521;125525;125514;125519;125511;27790;27792;82704;82702;82695;90588;491744;491734;491773;491756;426699;426713;426708;426700;426701;426704;426711;426706;35894;35913;35865;35859;35896;35857;35845;35909;35843;35922;35861;35873;35872;35844;35933;35928;35915;35870;35900;35891;35924;35897;35956;35907;35932;35883;35919;35979;35930;35927;79313;79322;793…	-	Succinate-semialdehyde dehydrogenase, mitochondrial OS=Homo sapiens GN=ALDH5A1 PE=1 SV=2
5681_1	sp|O60942|MCE1_HUMAN	13.076	0.000204499	68512.6	DNSVFHVSNLEFPFR;GVTQVTTQPK;LGAIFLEGVTVK	1;1;1	3	3	0.062	571292;159957;272029	-	mRNA-capping enzyme OS=Homo sapiens GN=RNGTT PE=1 SV=1
4532_1	sp|Q9H2A2|AL8A1_HUMAN	111.976	0	53367.2	AGVPPGVVNIVFGTGPR;ALAEGAQIWCGEGVDK;ALAEGAQIWCGEGVDKLSLPAR;DSYDFFTEIK;EAFPSWSSR;EGAKDSYDFFTEIK;ELNLPFGGMK;FLPCSSYIDSYDPSTGEVYCR;IAPAMAAGNTVIAKPSELTSVTAWMLCK;ITQLSAPHCK;KLSLELGGK;LLDKAGVPPGVVNIVFGTGPR;LQSGLVWTNCWLIR;LSLELGGK;NPAIIFEDANLDECIPATVR;RALAEGAQIWCGEGVDK;RFVEATR;SIYSEFLK;SIYSEFLKR;SSFANQGEICLCTSR;TMDIPR;VGEALVSHPEVPLISFTGSQPTAER;VPNSGKDEIEAAVK;YGLAATVWSSNVGR	1;1;1;1;1;1;1;1;1;1;1;1;1;1;1;1;1;1;1;1;1;1;1;1	24	130	0.5503	488349;488336;488338;488347;488339;488340;488350;488343;488356;488334;488346;488341;488342;488345;489171;488348;488365;489169;523359;523342;735967;735957;736206;735959;736202;736185;735955;281183;281184;281186;281190;281199;281185;163867;163875;163870;163865;494801;195675;185970;185966;195678;195672;185961;186618;769092;769094;769090;769093;769086;825488;217090;217097;217085;217074;217068;217100;…	-	Aldehyde dehydrogenase family 8 member A1 OS=Homo sapiens GN=ALDH8A1 PE=1 SV=1
6843_1	sp|Q96ST2|IWS1_HUMAN	11.6735	0.000204499	91899.2	AVMYLYK;ILQELPSVSQETLK;MNEAAEEDR	1;1;1	3	3	0.0366	79587;461351;162814	-	Protein IWS1 homolog OS=Homo sapiens GN=IWS1 PE=1 SV=2
7081_1	sp|O15355|PPM1G_HUMAN	31.185	0	59234.7	AIGDHFYK;ALEDAFLAIDAK;ELAQIAGRPTEDEDEKEK;LPLPYGFSAMQGWR;LTTEEVIK;NTAELQPESGKR;QLIVANAGDSR;YLPDIIK	1;1;1;1;1;1;1;1	8	11	0.1648	107694;288971;661073;480916;489372;99665;99669;320351;209867;67836;67839	-	Protein phosphatase 1G OS=Homo sapiens GN=PPM1G PE=1 SV=1
7000_1	sp|Q14894|CRYM_HUMAN	45.5878	0	33754.4	EAVLYVDSQEAALK;ELDDELMK;FADTVQGEVR;GYLGVMPAYSAAEDALTTK;LIYDSWSSGK;SLGMAVEDTVAAK;TAAVSAIATK;TVVPVTK;VPAFLSAAEVEEHLR	1;1;1;1;1;1;1;1;1	9	13	0.3376	436526;128454;195612;629226;629211;629222;217497;217510;297211;99691;18573;504762;504741	-	Ketimine reductase mu-crystallin OS=Homo sapiens GN=CRYM PE=1 SV=1
7917_1	sp|P63208|SKP1_HUMAN	31.6386	0	18646.2	GLLDVTCK;NDFTEEEEAQVR;NDFTEEEEAQVRK;RTDDIPVWDQEFLK;TDDIPVWDQEFLK;TVANMIK;VIQWCTHHK	1;1;1;1;1;1;1	7	15	0.3129	87674;398514;398517;398965;466837;466838;551272;551265;472168;472159;472152;31384;31386;37056;250677	-	S-phase kinase-associated protein 1 OS=Homo sapiens GN=SKP1 PE=1 SV=2
5603_1	sp|Q9NPL8|TIDC1_HUMAN	14.804	0.000204499	32157.8	ALHELK;FDAVQSAHR;IESSLQEDEPENDAK;LPYVPEPYYPESGWDR	1;1;1;1	4	6	0.1614	5516;5506;146706;146747;523286;633028	-	Complex I assembly factor TIMMDC1, mitochondrial OS=Homo sapiens GN=TIMMDC1 PE=1 SV=2
724_1	sp|Q9BWS9|CHID1_HUMAN	63.1817	0	44912.3	ACVQVLDPK;AESVVLEHR;DAREPVVGAR;DRHFAGDVLGYVTPWNSHGYDVTK;EMFEVTGLHDVDQGWMR;FTQISPVWLQLK;GLHIVPR;GLVVTDLK;GLVVTDLKAESVVLEHR;GREMFEVTGLHDVDQGWMR;HVVFYPTLK;LLFEDWTYDDFR;NVLDSEDEIEELSK;SQFSDKPVQDR;YIQTLK	1;1;1;1;1;1;1;1;1;1;1;1;1;1;1	15	48	0.3817	146303;150053;165209;801993;658960;659237;658963;663923;658955;664280;394924;394923;394921;394916;394915;394934;394936;36926;36928;36921;59488;59485;594058;717428;184898;184904;184874;184885;184895;184891;479103;479099;479139;479127;479122;479131;479138;479691;479675;479135;479146;479130;479123;479134;306158;306174;306159;27467	-	Chitinase domain-containing protein 1 OS=Homo sapiens GN=CHID1 PE=1 SV=1
1663_1	sp|P63241|IF5A1_HUMAN	52.772	0	16821.4	EDLRLPEGDLGK;IVEMSTSK;KYEDICPSTHNMDVPNIK;LPEGDLGK;LPEGDLGKEIEQK;NGFVVLK;VHLVGIDIFTGK;VHLVGIDIFTGKK;YEDICPSTHNMDVPNIK;YEDICPSTHNMDVPNIKR	1;1;1;1;1;1;1;1;1;1	10	104	0.4091	327032;327027;327020;327025;82014;82021;82012;82013;82019;82015;82017;82016;82075;82020;690009;689997;689988;689996;689966;689991;690212;689993;689969;690008;694648;694643;694867;694649;690006;694654;694641;51644;392514;392513;31650;31424;31643;31661;31663;31648;31649;31642;31434;31659;31426;31422;31644;31651;31423;31635;31637;31646;31638;301614;301622;301606;301617;301612;301599;301621;301609;30…	-	Eukaryotic translation initiation factor 5A-1 OS=Homo sapiens GN=EIF5A PE=1 SV=2
7958_1	sp|P05362|ICAM1_HUMAN	47.5308	0	57789	ASVSVTAEDEGTQR;DGTFPLPIGESVTVTR;ELLLPGNNR;GGSVLVTCSTSCDQPK;KELLLPGNNR;LLGIETPLPK;REPAVGEPAEVTTTVLVR;VELAPLPSWQPVGK;VLYGPR;VTLNGVPAQPLGPR	1;1;1;1;1;1;1;1;1;1	10	19	0.2218	388941;388910;516134;516132;516112;144510;519167;216725;216731;170744;170742;617103;617100;428416;3172;371822;371827;372483;372489	-	Intercellular adhesion molecule 1 OS=Homo sapiens GN=ICAM1 PE=1 SV=2
2850_1	sp|Q9Y4H4|GPSM3_HUMAN	6.1273	0.00351617	17854.9	EQLYSTILSHQCQR;HTALGPR	1;1	2	2	0.1313	551679;21701	-	G-protein-signaling modulator 3 OS=Homo sapiens GN=GPSM3 PE=1 SV=1
6517_1	sp|Q9NP77|SSU72_HUMAN	18.132	0.000204499	22560	DKELYTQNGILHMLDR;ELYTQNGILHMLDR;TTYDQMYNDLLR;VYDQVVEDLNSR	1;1;1;1	4	6	0.2062	625395;523016;434593;443037;435186;381443	-	RNA polymerase II subunit A C-terminal domain phosphatase SSU72 OS=Homo sapiens GN=SSU72 PE=1 SV=1
7040_1	sp|Q5T2T1|MPP7_HUMAN	11.9976	0.000204499	65483.1	LLISDTQHYGVTVPHTTR;NREPLGATIK;SGLIHVGDELR;SLHSLVK	1;1;1;1	4	4	0.0799	655159;181851;242824;33511	-	MAGUK p55 subfamily member 7 OS=Homo sapiens GN=MPP7 PE=1 SV=1
5643_1	sp|Q96SK2|TM209_HUMAN	11.2158	0.000204499	62881.5	ELSQGGCMSSFR;HVYNLPK;TLDTFLR	1;1;1	3	3	0.0463	336572;71938;69793	-	Transmembrane protein 209 OS=Homo sapiens GN=TMEM209 PE=1 SV=2
5872_1	sp|P36957|ODO2_HUMAN	65.312	0	48724.5	AKPAEAPAAAAPK;ASAFALQEQPVVNAVIDDTTK;EAFLKK;EAVTFLR;EAVTFLRK;GLVVPVIR;HKEAFLK;LGFMSAFVK;NVEAMNFADIER;TITELGEK;TPAFAESVTEGDVR;VEGGTPLFTLR;VEGGTPLFTLRK;VEVRPMMYVALTYDHR	1;1;1;1;1;1;1;1;1;1;1;1;1;1	14	66	0.2848	241195;241184;241192;241197;241191;705838;705840;705849;705845;705846;705841;705831;705839;705836;705835;705832;705848;705847;706073;706068;706074;705837;706296;706308;706297;706078;16398;55216;55218;55238;55219;55221;115029;63689;63687;63686;63691;63690;63693;73345;132104;132112;132109;139747;139750;139748;139739;365719;375044;375503;366223;80607;405612;405611;405588;239303;239319;239297;239294;…	-	Dihydrolipoyllysine-residue succinyltransferase component of 2-oxoglutarate dehydrogenase complex, mitochondrial OS=Homo sapiens GN=DLST PE=1 SV=4
3693_1	sp|Q96EY8|MMAB_HUMAN	47.3703	0	27371	GFSSTFTGER;GHTFAEELQK;GPQGVEDGDRPQPSSK;IQCTLQDVGSALATPCSSAR;ISSALHFCR;LSDYLFTLAR;RVVPLVQMGETDANVAK;VVPLVQMGETDANVAK;YTSQLPPLTAFILPSGGK	1;1;1;1;1;1;1;1;1	9	49	0.44	175495;175466;175492;220023;220027;220025;220010;497306;497303;683380;683382;683381;683386;683377;683407;683384;683383;683378;683626;176810;176824;176822;244626;244633;244627;244623;244629;244625;579011;585361;579009;585368;585712;506712;506721;506725;506730;506706;506723;506726;506731;506729;506714;514951;515462;514961;507260;603833;603834	-	Cob(I)yrinic acid a,c-diamide adenosyltransferase, mitochondrial OS=Homo sapiens GN=MMAB PE=1 SV=1
2334_1	sp|Q08378|GOGA3_HUMAN	129.162	0	167252	AQGGSSDSSLALHER;AQLQLLQK;ASQAEISSLQSVR;EAADAELGQLR;ELEGLQQLLQNVK;ELQEVIALTSQELEESREK;FMLQAK;HLVQALQASLEK;HSQEIAQFQAELAEAR;IILEAALQAAK;IKEQFLQQK;IQALEAELQAVSHSK;KELEGLQQLLQNVK;LEGQLEALSLEASQALK;LENVSLSQQLTETQHR;LGSDLTSAQK;LQEALAAK;LTGLGQSNAALR;LTLLQR;MADSAASLEQQLEQVK;NLNSCLQQLK;QHMADLEGHLQSAQK;QIEELQQEAR;QQLDLTEQQGR;QQMTALQSQLQQVQLER;QWYQQQLALAQEAR;SGQVEHLQQETAALKK;TLLQQNQQLK	1;1;1;1;1;1;1;1;1;1;1;1;1;1;1;1;1;1;1;1;1;1;1;1;1;1;1;1	28	37	0.225	424465;103409;346454;228736;423281;709559;16806;324420;579196;579182;208521;221604;221614;481475;481479;481477;490068;490076;568087;601215;601209;601609;601218;141860;58874;245747;18624;544732;255920;518166;269848;312655;652737;652370;538121;553718;253856	-	Golgin subfamily A member 3 OS=Homo sapiens GN=GOLGA3 PE=1 SV=2
4791_1	sp|Q96S19|CP013_HUMAN	38.2948	0	22563.7	AFPLAEWQPSDVDQR;ALLITYGPYAINGK;CLDSIAATTQAQGLTNVK;CTEGLFR;ISPQSNVDFDLMLR;NKDPILHVLR;VLEVASGSGQHAAHFAR	1;1;1;1;1;1;1	7	11	0.4657	549911;549914;413465;413469;604639;77766;487182;248328;539988;540372;539985	-	UPF0585 protein C16orf13 OS=Homo sapiens GN=C16orf13 PE=1 SV=2
1953_1	sp|P0C7P0|CISD3_HUMAN	28.5455	0	14206.4	ATQRPPYCDGTHR;KQPFCDGSHFFQR;MVALCTCK;QPFCDGSHFFQR;TPIKVELVAGK;VELVAGK	1;1;1;1;1;1	6	14	0.3543	448000;447999;447998;447995;497253;497257;497249;123422;430248;430864;217358;217359;217362;7816	-	CDGSH iron-sulfur domain-containing protein 3, mitochondrial OS=Homo sapiens GN=CISD3 PE=1 SV=1
7819_1	sp|Q9NR19|ACSA_HUMAN	56.2682	0	78529.1	AELGMGDSTSQSPPIK;AELGMGDSTSQSPPIKR;DQDGYYWITGR;EFWGDIAK;FYTAPTAIR;GATTNICYNVLDR;IFIEWMK;IGALHSIVFAGFSSESLCER;IGPIATPDYIQNAPGLPK;LWSIVDKYK;QPWPGIMR;SAHVPSLQR;YNFDVTK	1;1;1;1;1;1;1;1;1;1;1;1;1	13	26	0.194	478706;556369;563442;556389;563869;563877;345094;115664;150061;414623;116318;116320;116319;123532;116315;695507;594026;594031;594029;594028;594027;215636;124457;129764;129754;79234	-	Acetyl-coenzyme A synthetase, cytoplasmic OS=Homo sapiens GN=ACSS2 PE=1 SV=1
2596_1	sp|Q14764|MVP_HUMAN	141.034	0	99265.9	ALQPLEEGEDEEK;ALQPLEEGEDEEKVSHQAGDHWLIR;AQALAIETEAELQR;AQLELEVSK;AQQLAEVEVK;AQQLAEVEVKK;AVIGSTYMLTQDEVLWEK;DITPLQVVLPNTALHLK;DQAVFPQNGLVVSSVDVQSVEPVDQR;ELPPGVEELLNK;GAVASVTFDDFHK;GPDGMALPRPR;GPLEYVPSAK;HYCTVANPVSR;IEGEGSVLQAK;IPPYHYIHVLDQNSNVSR;LAQDPFPLYPGEVLEK;LFSVPDFVGDACK;LLQSLGLK;QAIPLDENEGIYVQDVK;QMTEAIGPSTIR;SLQPLAPR;TALHLR;TAVFGFETSEAKGPDGMALPRPR;VASGPSPGEGISPQSAQAPQAPGDNHVVPVLR;VLFAPMR;VP…	1;1;1;1;1;1;1;1;1;1;1;1;1;1;1;1;1;1;1;1;1;1;1;1;1;1;1;1;1	29	68	0.4121	409371;820511;440274;440279;140515;191146;269477;269478;669048;596773;596770;596772;596774;812099;812105;324858;356739;356807;224762;224768;161129;304333;304317;304311;304325;201833;687756;687761;687757;687771;688033;687758;687753;687760;687752;687759;688027;574882;574888;574878;574872;575339;391731;391740;391718;391789;73066;73064;73081;619620;304370;314099;304455;77569;5528;5527;754179;841307;8…	-	Major vault protein OS=Homo sapiens GN=MVP PE=1 SV=4
386_1	sp|O43772|MCAT_HUMAN	78.661	0	32922.1	AFPANAACFLGFEVAMK;CLLQIQASSGESK;DEGVTSLYK;EGITGLYR;ELIRDEGVTSLYK;FLNWATPNL;FQTAPPGK;FQTAPPGKYPNGFR;GFNAVMIR;GTVLTLMR;KLYQEFGIR;LQTQPPSLPGQPPMYSGTFDCFR;LQTQPPSLPGQPPMYSGTFDCFRK;LYQEFGIR;NIFTPEGK;NIFTPEGKR;RVSELSAPR;VSELSAPR;YTGTLDCAK;YTGTLDCAKK	1;1;1;1;1;1;1;1;1;1;1;1;1;1;1;1;1;1;1;1	20	69	0.495	591789;591798;372794;372808;372797;373409;374029;137769;89314;89305;89308;429309;429315;429320;429308;429317;167607;167606;167599;167615;59882;59886;59887;59881;59880;59888;59890;459231;459218;459234;459211;95387;88837;95388;80677;88526;80679;80684;88528;216683;216686;216688;216685;216689;216690;789704;787912;787732;789824;787633;789829;787729;787914;804163;806340;804288;144439;144435;87642;87633…	-	Mitochondrial carnitine/acylcarnitine carrier protein OS=Homo sapiens GN=SLC25A20 PE=1 SV=1
1498_1	sp|Q16773|KAT1_HUMAN	19.4205	0.000204499	47844.1	ALVLNTPNNPLGK;TFGYPPLTK;TVHQNSVFHCPTQSQAAVAESFER;VGWVLGPDHIMK	1;1;1;1	4	7	0.1374	332803;332176;143576;143548;801678;801215;332648	-	Kynurenine--oxoglutarate transaminase 1 OS=Homo sapiens GN=KYAT1 PE=1 SV=1
8132_1	sp|Q8N0Z8|PUSL1_HUMAN	12.2323	0.000204499	33212.2	TDAGVHALSNAAHLDVQR;VSVSPGQASPLVTPEESR	1;1	2	2	0.1188	598145;584734	-	tRNA pseudouridine synthase-like 1 OS=Homo sapiens GN=PUSL1 PE=1 SV=1
7831_1	sp|Q9Y2D4|EXC6B_HUMAN	13.6726	0.000204499	94141.1	LIDTVAK;STFAVFTHLPGK;TLSNSLQNVIK	1;1;1	3	3	0.037	25313;305193;255563	-	Exocyst complex component 6B OS=Homo sapiens GN=EXOC6B PE=1 SV=3
595_1	sp|P51570|GALK1_HUMAN	86.4008	0	42245.6	AFREEFGAEPELAVSAPGR;DGLVSLLTTSEGADEPQR;EEFGAEPELAVSAPGR;ESLREVQLEELEAAR;EVQLEELEAAR;HIQEHYGGTATFYLSQAADGAK;HSLASSEYPVR;HSLASSEYPVRR;HVVGEIR;KDGLVSLLTTSEGADEPQR;LAVLITNSNVR;LQFPLPTAQR;MTGGGFGGCTVTLLEASAAPHAMR;QCEEVAR;QPQVAELLAEAR;SLETSLVPLSDPK;TAQAAAALR;WANYVK	1;1;1;1;1;1;1;1;1;1;1;1;1;1;1;1;1;1	18	48	0.4745	653620;653621;602875;499749;499738;555735;294325;294320;741105;741312;271146;271142;361257;361262;43743;648314;648317;648282;648303;245334;245333;245335;245327;245338;245337;245340;245343;227291;227303;227287;227317;227295;227314;227307;746583;749748;749764;80774;317482;317474;317486;317487;317495;352508;352503;73329;73317;32457	-	Galactokinase OS=Homo sapiens GN=GALK1 PE=1 SV=1
3182_1	sp|P51610|HCFC1_HUMAN	99.3099	0	208602	AGHCAVAINTR;CYLFGGLANDSEDPKNNIPR;DLWYLETEKPPPPAR;ENQWFDVGVIK;GAPGQPGTILR;GPLPAGTILK;IATGHGQQGVTQVVLK;IITAVPK;KQELQPGTAYK;LGHSFSLVGNK;LLVFGGMVEYGK;LYIWSGR;SLHSATTIGNK;SPDGAHLTWEPPSVTSGK;SPISVPGGSALISNLGK;SSTPAQLAFMR;TQGVPAVLK;TVESGLEVAAAPSVTPQAGTALLAPFPTQR;VAGINACGR;VASSPVMVSNPATR;VMTSGTGAPAK;YSNDLYELQASR	1;1;1;1;1;1;1;1;1;1;1;1;1;1;1;1;1;1;1;1;1;1	22	37	0.1396	226349;226354;721610;573090;323222;323232;164135;116506;116508;487866;487862;17933;17932;280368;280370;219611;219595;219603;309735;309734;82300;200378;594272;594282;468163;468165;250713;250718;91217;830259;93403;369924;369926;379275;141808;141794;394410	-	Host cell factor 1 OS=Homo sapiens GN=HCFC1 PE=1 SV=2
264_1	sp|Q96HP0|DOCK6_HUMAN	11.1907	0.000204499	229414	ASISQGPPTASR;EALQPLLTQR;NLIPILEAHR	1;1;1	3	3	0.0156	227958;226051;230775	-	Dedicator of cytokinesis protein 6 OS=Homo sapiens GN=DOCK6 PE=1 SV=3
5132_2	sp|P43405|KSYK_HUMAN	27.2957	0	72020.3	ELNGTYAIAGGR;ISDFGLSK;KAHHYTIER;NVLLVTQHYAK;QTWNLQGQALEQAIISQKPQLEK;TGPFEDLKENLIR;THASPADLCHYHSQESDGLVCLLK	1;0;1;1;1;1;1	6	8	0.1575	257842;70284;217114;293923;293928;791350;434351;434316;802391	-	Tyrosine-protein kinase SYK OS=Homo sapiens GN=SYK PE=1 SV=1
8273_1	sp|Q8TBC4|UBA3_HUMAN	72.8308	0	51819.3	AEVAAEFLNDRVPNCNVVPHFNK;ASQYNIR;ENCPACSQLPQNIQFSPSAK;EQPFGEGVPLDGDDPEHIQWIFQK;KENCPACSQLPQNIQFSPSAK;LPEHCIEYVR;LQEVLDYLTNSASLQMK;LTQGVVK;MAVDGGCGDTGDWEGR;NLALSGFR;QIHVIDMDTIDVSNLNR;SPAITATLEGK;TLYLQSVTSIEER;VLVIGAGGLGCELLK;VPNCNVVPHFNK	1;1;1;1;1;1;1;1;1;1;1;1;1;1;1	15	39	0.4082	789734;789730;789729;789728;789843;63009;63006;720740;720982;720739;720978;720974;808023;808295;749051;749053;311489;311474;633346;633689;18890;512699;75965;75985;75958;637680;643244;174952;438242;438254;438646;415950;415951;415944;415949;415948;375177;375179;375173	-	NEDD8-activating enzyme E1 catalytic subunit OS=Homo sapiens GN=UBA3 PE=1 SV=2
5079_1	sp|Q969R8|ITFG2_HUMAN	9.08193	0.00039093	49281.5	ALLHQTLYHPDQPPQCAPSSLQDPT;NVSTHLIGNIK	1;1	2	3	0.0805	812278;812426;242924	-	Integrin-alpha FG-GAP repeat-containing protein 2 OS=Homo sapiens GN=ITFG2 PE=1 SV=1
7734_1	sp|Q14739|LBR_HUMAN	20.3833	0.000204499	70658	ENDIKPLTSFR;FADGEVVR;KFADGEVVR;TFEVTPIR;TIHTSTGK	1;1;1;1;1	5	11	0.0585	314240;314236;314250;314232;314215;314141;314362;81222;142302;114408;59143	-	Lamin-B receptor OS=Homo sapiens GN=LBR PE=1 SV=2
3291_1	sp|P61313|RL15_HUMAN	40.2353	0	24131.1	FFEVILIDPFHK;FHHTIGGSR;HCGALR;KQSDVMR;NPDTQWITKPVHK;NTLQLHR;QGYVIYR;QLSALHR;SLQSVAEER;VLNSYWVGEDSTYK;YIQELWR	1;1;1;1;1;1;1;1;1;1;1	11	44	0.4804	419460;137793;137809;137800;137794;137814;137811;137799;137813;6436;6437;68343;450626;450615;450627;450628;450621;77504;77516;77511;77528;77494;83724;83734;50234;141241;501020;501026;501001;501012;501018;501016;501025;501014;501491;501466;501008;501474;501083;136071;136088;136068;136086;136085	-	60S ribosomal protein L15 OS=Homo sapiens GN=RPL15 PE=1 SV=2
5388_1	sp|P53597|SUCA_HUMAN	48.7754	0	36226.8	GGQTHLGLPVFNTVK;IGIMPGHIHK;IICQGFTGK;ISALQSAGVVVSMSPAQLGTTIYK;LIGPNCPGVINPGECK;LVGGTTPGK;MGHAGAIIAGGK;QGTFHSQQALEYGTK;QHLYVDK;QHNSGPNSKPVVSFIAGLTAPPGR	1;1;1;1;1;1;1;1;1;1	10	66	0.4075	452415;452423;452420;452414;452408;452419;452417;452427;452421;452406;452416;452418;452412;452975;453035;452407;184288;193826;184259;184250;184242;184253;184252;193825;143514;143501;143519;143526;143508;752192;752353;754693;533801;533822;533800;534179;52301;52315;181699;171652;171654;181704;171662;181701;181705;171650;171655;181703;171664;171648;171649;171642;171660;171640;518734;518742;518732;51…	-	Succinate--CoA ligase [ADP/GDP-forming] subunit alpha, mitochondrial OS=Homo sapiens GN=SUCLG1 PE=1 SV=4
4018_1	sp|Q9HCL2|GPAT1_HUMAN	45.5225	0	93735.5	EHQQFITFLQR;GLGGPTSTPPNLISQEQLVR;GMFATNVTENVLNSSR;KLPEPLSWR;LGGFFIR;NATDESLR;NVAVYAESATYCLVK;NVIYINETHTR;VDFAQPFSLK;VSVLELSSTFLPQCNR	1;1;1;1;1;1;1;1;1;1	10	18	0.1486	387399;663578;663582;663576;663587;541163;198361;198371;198359;43746;87426;515335;337323;337341;337343;215421;215420;588218	-	Glycerol-3-phosphate acyltransferase 1, mitochondrial OS=Homo sapiens GN=GPAM PE=1 SV=3
2113_1	sp|Q9NQ55|SSF1_HUMAN	15.7916	0.000204499	53160.8	CLLIDYNPDSQELDFR;MTLQLIK;NLEAYAANPHSFVFTR;VMEPLTASR;VMFHSFVSK	1;1;1;1;1	5	5	0.1205	642773;60703;583233;141805;170983	-	Suppressor of SWI4 1 homolog OS=Homo sapiens GN=PPAN PE=2 SV=1
8513_1	sp|Q9H9E3|COG4_HUMAN	37.3788	0	89026.4	FDSCLSDLAAVSNK;IFPLLGLHEEGLR;IFPLLGLHEEGLRK;IVETHQPIVETYYGPGR;LLQEAEQR;LSGVQQPSEGVGGGR;LSQMATILNLER;LYTLIK	1;1;1;1;1;1;1;1	8	11	0.1096	430907;413476;413478;480650;480657;629651;125289;376644;354150;354154;21452	-	Conserved oligomeric Golgi complex subunit 4 OS=Homo sapiens GN=COG4 PE=1 SV=3
1067_3	sp|Q13185|CBX3_HUMAN	16.5792	0.000204499	20798.3	CPQIVIAFYEER;IIGATDSSGELMFLMK;KVEEAEPEEFVVEK;LTWHSCPEDEAQ;SLSDSESDDSK;VEYFLK	1;1;1;1;1;1	6	10	0.388	429965;527652;527648;535773;501585;501590;501584;401500;226183;39362	-	Chromobox protein homolog 3 OS=Homo sapiens GN=CBX3 PE=1 SV=4
6686_1	sp|Q9NQR4|NIT2_HUMAN	104.999	0	30588.6	AGTEEAIVYSDIDLK;AGTEEAIVYSDIDLKK;ASYVAWGHSTVVNPWGEVLAK;AVDNQVYVATASPAR;AVDNQVYVATASPARDDK;ECSIYLIGGSIPEEDAGK;FAELAQIYAQR;IHLFDIDVPGK;IPGESTQK;ITFQESK;IVSLPECFNSPYGAK;KIHLFDIDVPGK;LALIQLQISSIK;LYNTCAVFGPDGTLLAK;QQIPVFR;RSDLYAVEMK;SDLYAVEMK;TLSPGDSFSTFDTPYCR;VGLGICYDMR;YFPEYAEK	1;1;1;1;1;1;1;1;1;1;1;1;1;1;1;1;1;1;1;1	20	100	0.75	481358;481360;546726;546720;546725;546670;719826;719823;449697;449683;449694;449690;449696;450536;449699;450545;616077;615678;615652;616405;616074;621945;621949;621904;308064;308063;308073;308059;275887;275884;275886;275854;275883;275890;275877;275889;275885;275892;275870;275876;275868;275880;275867;275904;275874;275879;275873;275866;275850;275888;275861;275862;275882;66717;66702;63370;512320;512…	-	Omega-amidase NIT2 OS=Homo sapiens GN=NIT2 PE=1 SV=1
178_1	sp|Q9BX40|LS14B_HUMAN	6.76064	0.00169747	42045.3	KLNTETFGVSGR;YEGILYTIDTDNSTVALAK	1;1	2	2	0.0805	307541;670676	-	Protein LSM14 homolog B OS=Homo sapiens GN=LSM14B PE=1 SV=1
7049_1	sp|Q96CV9|OPTN_HUMAN	10.2005	0.000204499	65880.2	LLQEHNNALK;TVSTGTALSK	1;1	2	4	0.0347	233146;233143;233137;115425	-	Optineurin OS=Homo sapiens GN=OPTN PE=1 SV=2
3955_1	sp|Q9UGP4|LIMD1_HUMAN	61.2166	0	72143.9	ADYFGACVK;AFYFVNGK;GVFGAGQACQAMGNLYHDTCFTCAACSR;IHLQQQQQQLLQEETLPR;LSPTSLVHPVMSTLPELSCK;QLSLSSSR;RPSSTALHQHHF;SSEKPTGLWSTASSQR;SYLSSSAPSSSPAGLDGSQQGAVPGLGPKPGCTDLGTGPK;TPSVSAPLALSCPR;VFCEEDFLYSGFQQSADR;VRLPCQPLVPGPELRPSAAELK;VSPGLPSPNLENGAPAVGPVQPR	1;1;1;1;1;1;1;1;1;1;1;1;1	13	19	0.3491	146674;105351;840362;840530;709205;709207;709211;699949;75897;370913;532439;876900;876931;392495;392505;700548;700279;753198;715172	-	LIM domain-containing protein 1 OS=Homo sapiens GN=LIMD1 PE=1 SV=1
1080_1	sp|Q9Y6X8|ZHX2_HUMAN	22.7216	0.000204499	92249.8	ASFLQSQFPDDAEVYR;LIEVTGLAR;LVTDTAEILSR;TYHAYPDFAPQK;VPVPLNTTK	1;1;1;1;1	5	6	0.0681	597464;118549;256083;381887;381883;117263	-	Zinc fingers and homeoboxes protein 2 OS=Homo sapiens GN=ZHX2 PE=1 SV=1
5973_1	sp|P62875|RPAB5_HUMAN	7.73196	0.000581846	7639.99	MIIPVR;MLLAHVDLIEK	1;1	2	2	0.2537	13171;291815	-	DNA-directed RNA polymerases I, II, and III subunit RPABC5 OS=Homo sapiens GN=POLR2L PE=1 SV=1
4852_1	sp|Q96PQ7|KLHL5_HUMAN	5.07477	0.00789293	84402.6	NQEFVLLPASEIAK	1	1	2	0.0185	448269;448271	-	Kelch-like protein 5 OS=Homo sapiens GN=KLHL5 PE=2 SV=3
6170_1	sp|O00560|SDCB1_HUMAN	24.663	0.000204499	32423.9	DSTGHVGFIFK;FGDQVLQINGENCAGWSSDK;ITMTIR;NGLLTEHNICEINGQNVIGLK;SLMDHTIPEV;TITMHK	1;1;1;1;1;1	6	11	0.2483	250077;250054;708074;708076;16090;16089;734978;735305;735545;208624;14203	-	Syntenin-1 OS=Homo sapiens GN=SDCBP PE=1 SV=1
1127_1	sp|O95169|NDUB8_HUMAN	21.5559	0.000204499	21751.4	DPWYSWDQPGLR;GGDPSKEPER;QYPYNNLYLER;SQHERDPWYSWDQPGLR	1;1;1;1	4	13	0.2043	427646;427649;427652;427662;427648;165760;165730;401659;401660;688903;688900;688901;688902	-	NADH dehydrogenase [ubiquinone] 1 beta subcomplex subunit 8, mitochondrial OS=Homo sapiens GN=NDUFB8 PE=1 SV=1
4365_1	sp|Q53H12|AGK_HUMAN	33.2028	0	47107.4	AACQEAQVFGNQLIPPNAQVK;ATVFLNPAACK;EQPVFAMTGLR;GETVPLDVLQIK;LASYWAQPQDALSQEVSPEVWK;NAAPILHLSGMDVTIVK;VQHITDATLAIVK	1;1;1;1;1;1;1	7	14	0.2536	722451;722716;240336;240357;240316;273073;309359;309358;309356;772436;558864;558877;565981;366096	-	Acylglycerol kinase, mitochondrial OS=Homo sapiens GN=AGK PE=1 SV=2
6038_1	sp|Q96A65|EXOC4_HUMAN	47.7624	0	110429	DISAIEEAMSASLQQHK;DPSGLLISVIR;FLDTSHYSTAGSSSVR;ILANADTMK;LWIEGIEHK;NIFVLQQNLTNITMSR;NITVIFHPLLR;SQTGVGELTTQNTR;TASEPSAQLSYASTGR;YTELEYIHALTLLHR	1;1;1;1;1;1;1;1;1;1	10	13	0.1376	591072;226654;528931;120885;197683;604703;604708;316497;412062;482237;482230;482851;596708	-	Exocyst complex component 4 OS=Homo sapiens GN=EXOC4 PE=1 SV=1
6323_1	sp|P05556|ITB1_HUMAN	94.6058	0	88357	DKLPQPVQPDPVSHCK;DNTNEIYSGK;FCECDNFNCDR;FQGQTCEMCQTCLGVCAEHK;GCPPDDIENPR;GEVFNELVGK;GICECGVCK;HCECSTDEVNSEDMDAYCR;IGFGSFVEK;KGCPPDDIENPR;LKPEDITQIQPQQLVLR;LSEGVTISYK;NVLSLTNK;NVLSLTNKGEVFNELVGK;SAVTTVVNPK;SGEPQTFTLK;SLGTDLMNEMR;SNGLICGGNGVCK;TVMPYISTTPAK	1;1;1;1;1;1;1;1;1;1;1;1;1;1;1;1;1;1;1	19	58	0.2594	586127;586110;586113;586130;586111;586139;586547;208116;436852;755735;755737;758676;755739;755956;284175;284171;177545;171399;743778;743777;747126;123974;123976;123987;358957;649490;649483;649488;649485;649484;649487;649481;649486;649477;180678;180671;180689;180612;180608;80143;630593;630603;631178;140000;140053;187180;187129;187126;282487;324023;323551;324020;307538;307519;307520;307517;317312;3…	-	Integrin beta-1 OS=Homo sapiens GN=ITGB1 PE=1 SV=2
1201_1	sp|O60936|NOL3_HUMAN	27.5793	0	22615.7	GVLTGPEYEALDALPDAER;GVLTGPEYEALDALPDAERR;LLLLVQGK;SYDPPCPGHWTPEAPGSGTTCPGLPR;TAGAPDPAWDWQHVGPGYR	1;1;1;1;1	5	7	0.351	648261;693463;78500;78499;809679;668381;668384	-	Nucleolar protein 3 OS=Homo sapiens GN=NOL3 PE=1 SV=2
1999_1	sp|Q9Y597|KCTD3_HUMAN	17.3071	0.000204499	88928.7	CATPNISPATSVVQHSHLR;GMISTQPGSTPLASFK;HLVSVCADNNHVR	1;1;1	3	6	0.0589	666787;480499;480526;488827;428153;428167	-	BTB/POZ domain-containing protein KCTD3 OS=Homo sapiens GN=KCTD3 PE=1 SV=2
2457_1	sp|Q99460|PSMD1_HUMAN	226.588	0	105769	AAVESLGFILFR;CIDHYTK;CLDDHKYK;DNLEWLAR;DSDSMETEEK;DTSEDIEELVEPVAAHGPK;EAINLLEPMTNDPVNYVR;EALQLMATYLPK;EFALHK;EKVSTAVLSITAK;FTATASLGVIHK;HGGSLGLGLAAMGTAR;IEVLYEDEGFR;KEPEPNFQLLDNPAR;LCMSLMQNK;LEGIVNK;LLHVAVSDVNDDVR;LLHVAVSDVNDDVRR;MEEADALIESLCR;NAQAIEDMVGYAQETQHEK;NASNDIVR;NNNTDLMILK;NSVCHTATVIANSFMHCGTTSDQFLR;QAIGIALETR;QCVENADLPEGEK;QCVENADLPEGEKKPIDQR;QDVYDLLK;QFAALVASK;RLLHVAVSDVNDDVR;SGMYTVAM…	1;1;1;1;1;1;1;1;1;1;1;1;1;1;1;1;1;1;1;1;1;1;1;1;1;1;1;1;1;1;1;1;1;1;1;1;1;1;1;1;1;1;1	43	196	0.5047	316479;101120;101119;168914;168923;140339;140332;226846;654572;654564;654566;654554;654570;654557;654573;670655;670660;670653;670657;670659;670671;670679;670666;670674;675134;347543;347544;357047;347547;347555;347566;347546;347554;347540;357055;347578;347551;347541;18759;329999;270820;270818;270817;270826;270825;270809;270815;399826;408510;408555;399824;399821;399818;399816;343143;554479;554070;5…	-	26S proteasome non-ATPase regulatory subunit 1 OS=Homo sapiens GN=PSMD1 PE=1 SV=2
6906_1	sp|Q14451|GRB7_HUMAN	5.38887	0.0057133	59643.4	GILPCLLR;SQPLLIPTTGR	1;1	2	2	0.0357	103369;235184	-	Growth factor receptor-bound protein 7 OS=Homo sapiens GN=GRB7 PE=1 SV=2
2135_1	sp|Q8NDH3|PEPL1_HUMAN	22.3201	0.000204499	55825.5	AFPLFTHR;IVDTPCNEMNTDTFLEEINK;LVLADGVSYACK;VPWSHVR;YHAAVLTNSAEWEAACVK	1;1;1;1;1	5	6	0.1243	126160;744859;299360;77182;649600;649603	-	Probable aminopeptidase NPEPL1 OS=Homo sapiens GN=NPEPL1 PE=1 SV=3
6872_1	sp|Q99996|AKAP9_HUMAN	40.9272	0	453387	AYINTISSLK;ELEIIINHNR;ELHAQLQSSDGTGQSRPPLPSEDLLK;HVLGILDR;ILLEVVK;ISSSNQTPQILVK;LIFLDSIK;LQQELANIGQK;LQVLPQK;NLQLNLLLEQQK;SQSSASLIWR;SVLLAAFR	1;1;1;1;1;1;1;1;1;1;1;1	12	12	0.0332	188574;274429;810889;95255;45330;369578;107146;268755;50650;392103;204835;75502	-	A-kinase anchor protein 9 OS=Homo sapiens GN=AKAP9 PE=1 SV=3
6133_1	sp|Q8N961|ABTB2_HUMAN	8.13585	0.00039093	113584	HPLCPGASPAR;VQGLDPLQDLQNTLAER	1;1	2	2	0.0273	221914;611831	-	Ankyrin repeat and BTB/POZ domain-containing protein 2 OS=Homo sapiens GN=ABTB2 PE=2 SV=2
4011_1	sp|Q04837|SSBP_HUMAN	43.0276	0	17249	DVAYQYVK;IDYGEYMDK;IDYGEYMDKNNVR;IYLEGK;NPVTIFSLATNEMWR;QATTIIADNIIFLSDQTK;RQATTIIADNIIFLSDQTK;SGDSEVYQLGDVSQK;TTWHR;VGQDPVLR	1;1;1;1;1;1;1;1;1;1	10	21	0.6014	124804;203668;203667;477647;477646;477649;478067;486053;10642;566246;640865;640859;640857;686925;686919;686922;475002;475001;475545;719;78327	-	Single-stranded DNA-binding protein, mitochondrial OS=Homo sapiens GN=SSBP1 PE=1 SV=1
3561_1	sp|Q9H1I8|ASCC2_HUMAN	28.3624	0	86306.3	GNSPLLQK;LAPTLSQLDR;LASFYEAAIPEMESAIK;LLGDLWQR;PALPLDQLQITHK;SVFLTFLR;TSPALHPEQK	1;1;1;1;1;1;1	7	9	0.0978	65362;190657;595992;132587;402602;123645;123642;187218;187227	-	Activating signal cointegrator 1 complex subunit 2 OS=Homo sapiens GN=ASCC2 PE=1 SV=3
6002_1	sp|Q9BV19|CA050_HUMAN	21.2652	0.000204499	21863	ADEFIR;AGDPLDLVALAEQVQK;DANLHHVACNIVK;LTVIAEQIQHLQEQAR;QGAPPAAGQGGALVELTPTPGGLALVSPYHTHR	1;1;1;1;1	5	9	0.4221	21241;504233;504221;504219;411534;411544;598930;598931;850021	-	Uncharacterized protein C1orf50 OS=Homo sapiens GN=C1orf50 PE=1 SV=2
4905_1	sp|Q6IQ22|RAB12_HUMAN	32.0173	0	27231.1	AGGGGGLGAGSPALSGGQGR;DNFNVDEIFLK;ETFDDLPK;FAQQITGMR;FNSITSAYYR;FTDDTFCEACK;GIILVYDITK;GIILVYDITKK	1;1;1;1;1;1;1;1	8	9	0.3279	460595;460656;333599;115178;155873;257758;356558;205187;280476	-	Ras-related protein Rab-12 OS=Homo sapiens GN=RAB12 PE=1 SV=3
4283_2	sp|A0JNW5|UH1BL_HUMAN	23.1228	0.000204499	164095	AFNASFELSQLR;IQVSNTK;LFNDFDVK;LMSSSVVVR;NLSPDKINLSTLK;SLSEAIEK;SSTVSLEPAPVTVHIDHLVVER	1;1;1;1;1;1;1	7	7	0.054	350815;35862;131149;121410;385062;75128;745347	-	UHRF1-binding protein 1-like OS=Homo sapiens GN=UHRF1BP1L PE=1 SV=2
177_1	sp|P54136|SYRC_HUMAN	163.802	0	75330.9	AAYPDLENPPLLVTPSQQAK;AYQCVVLLQGK;DKVLTAEELNAAQTSVAYGCIK;EIAENITK;EMHVGHLR;FDTEEEFK;FGDYQCNSAMGISQMLK;GESFYQDR;GFDILGIKPVQR;GFVQVDDGR;GFVQVDDGRK;GNTAAYLLYAFTR;HLPDNECIEK;ILLDHEKEWK;IVFVPGCSIPLTIVK;IYDALDVSLIER;KVIVDFSSPNIAK;LANIDEEMLQK;LFEFAGYDVLR;LICDVSR;LKNCGCLGASPNLEQLQEENLK;LMDLLGEGLK;LMDLLGEGLKR;LNDYIFSFDK;LQEVFGHAIK;MNDIVKEFEDR;NCGCLGASPNLEQLQEENLK;NMINIISR;SDGGYTYDTSDLAAIK;SLTAEIDR;STIIGESI…	1;1;1;1;1;1;1;1;1;1;1;1;1;1;1;1;1;1;1;1;1;1;1;1;1;1;1;1;1;1;1;1;1;1;1	35	127	0.5576	687787;687785;687786;687790;688054;688059;290118;290129;289999;744577;744570;744571;93518;129286;121634;151984;626254;632426;632427;632702;632703;132926;327726;327730;327728;327732;327722;327729;327725;327727;128479;194671;194686;194634;395294;276195;276203;308861;308859;491492;491496;491497;491494;491499;491501;491500;491502;491504;364926;364892;364946;371244;371261;304416;305054;320712;320681;3…	-	Arginine--tRNA ligase, cytoplasmic OS=Homo sapiens GN=RARS PE=1 SV=2
3250_1	sp|Q96QZ7|MAGI1_HUMAN	24.2391	0.000204499	164481	APQATQEQDFYTVELER;GSEVTLLVQR;IATITTTHTPSQQGTQETR;ILAVNGCSITNK;ILGGNEPGEPIYIGHIVPLGAADTDGR	1;1;1;1;1	5	8	0.057	651317;183601;665400;665401;665398;665994;295958;801620	-	Membrane-associated guanylate kinase, WW and PDZ domain-containing protein 1 OS=Homo sapiens GN=MAGI1 PE=1 SV=3
7502_1	sp|Q9UPN9|TRI33_HUMAN	12.203	0.000204499	122456	NYVHFAATQVQNR;SLLQQLENVTK;TPGQINLAQLR	1;1;1	3	3	0.0311	443238;286723;252059	-	E3 ubiquitin-protein ligase TRIM33 OS=Homo sapiens GN=TRIM33 PE=1 SV=3
47_1	sp|Q14520|HABP2_HUMAN	17.7931	0.000204499	62630.4	FLNWIK;FTCACPDQFK;KEEFHEQSFR;LIANTLCNSR;TVCLPDGSFPSGSECHISGWGVTETGK	1;1;1;1;1	5	6	0.1125	48776;286274;286282;324072;221255;818221	-	Hyaluronan-binding protein 2 OS=Homo sapiens GN=HABP2 PE=1 SV=1
4246_1	sp|Q9H7D7|WDR26_HUMAN	13.3933	0.000204499	72078.7	CLYHNTK;FLLLQQK;GQFYQCDLDGNLLDSWEGVR;VLEALQVLR	1;1;1;1	4	4	0.0651	100682;80445;742622;150518	-	WD repeat-containing protein 26 OS=Homo sapiens GN=WDR26 PE=1 SV=3
5566_1	sp|P30793|GCH1_HUMAN	8.44806	0.00039093	27885.3	IVEIYSR;TREEFLTLIR;VHIGYLPNK	1;1;1	3	4	0.104	76801;289577;289596;150460	-	GTP cyclohydrolase 1 OS=Homo sapiens GN=GCH1 PE=1 SV=1
2249_1	sp|P53384|NUBP1_HUMAN	20.6535	0.000204499	34512.4	GQSFFIDAPDSPATLAYR;ILVLSGK;IQEFCNLHQSK;NCDKGQSFFIDAPDSPATLAYR;VPLDPLIGK	1;1;1;1;1	5	8	0.1531	628426;628429;14066;363161;761009;761160;108621;108623	-	Cytosolic Fe-S cluster assembly factor NUBP1 OS=Homo sapiens GN=NUBP1 PE=1 SV=2
6638_1	sp|P10768|ESTD_HUMAN	49.2584	0	31442.5	AFSGYLGTDQSK;AYDATHLVK;FAVYLPPK;FAVYLPPKAETGK;IPVVFR;KAFSGYLGTDQSK;MSIFGHSMGGHGALICALK;SGYHQSASEHGLVVIAPDTSPR;SVSAFAPICNPVLCPWGK;VFEHDSVELNCK	1;1;1;1;1;1;1;1;1;1	10	56	0.3972	286388;286394;286384;140810;140811;140845;100549;100545;100550;100537;100548;100542;100539;100547;100544;100540;100541;100546;100554;372991;372993;372990;14416;14417;361133;361132;361146;361144;644065;728208;728204;728428;728205;728202;728203;728201;728427;728207;728177;728421;644125;644115;644123;644121;644113;644114;644105;644124;644099;644117;644111;644462;644127;644466;404236;404240	-	S-formylglutathione hydrolase OS=Homo sapiens GN=ESD PE=1 SV=2
1112_1	sp|Q15257|PTPA_HUMAN	20.1188	0.000204499	40641.4	FGSLLPIHPVTSG;KEIHTVPDMGK;KLTFEYR;LVALLNTLDR;TGPFAEHSNQLWNISAVPSWSK	1;1;1;1;1	5	8	0.176	317494;276362;276365;284999;111046;200021;757869;758027	-	Serine/threonine-protein phosphatase 2A activator OS=Homo sapiens GN=PPP2R4 PE=1 SV=3
3295_1	sp|O14737|PDCD5_HUMAN	35.2881	0	14276.3	AVENYLIQMAR;HGDPGDAAQQEAK;LAELQAK;LSNLALVKPEK;NSILAQVLDQSAR;VSEQGLIEILK;VSEQGLIEILKK	1;1;1;1;1;1;1	7	14	0.536	307008;306974;316556;29885;252772;252789;252762;369466;369999;369463;261145;261142;261147;335805	-	Programmed cell death protein 5 OS=Homo sapiens GN=PDCD5 PE=1 SV=3
4051_1	sp|Q9H4A4|AMPB_HUMAN	82.1924	0	72549.5	AEFGPPGPGAGSR;AFFPCFDTPAVK;AIEAVAISPWK;AYVHEFK;EEYNGVIEEFLATGEK;GLSGTAVLDLR;IEPGVDPDDTYNETPYEK;LDSHPCLEVTAAALR;LFGPYVWGR;LGDTYPSISNAR;RPLHSAQAVDVASASNFR;RVDIIPGFEFDR;TYQLVYFLDK;VDIIPGFEFDR;VGEGPGVCWLAPEQTAGK;VKEFLHNQGK;VKIEPGVDPDDTYNETPYEK	1;1;1;1;1;1;1;1;1;1;1;1;1;1;1;1;1	17	33	0.2985	245024;245021;360020;236303;236295;81562;579174;183619;668943;668672;668949;496929;496935;179212;298186;298197;298204;617813;617805;618136;617822;397167;397168;295915;295917;306951;590311;590293;590281;245192;245159;245185;728360	-	Aminopeptidase B OS=Homo sapiens GN=RNPEP PE=1 SV=2
3526_1	sp|Q16401|PSMD5_HUMAN	100.098	0	56160.4	ALHSVLQAVPLNELR;DPLELFR;ELTGEDVLVR;FFGNLAVMDSPQQICER;GISSQPFPELHCAALK;GLIHPDDSVK;ILTLSQIGR;IVENSDAVTEILNNAELLK;LEAPLEELR;LGPLFSLLNENHR;LLQAMEPVHVAR;LMFNSPGFVEYVVDR;MTESWFSSLSR;QIVYCIGGENLSVAK;TIAEIFGNPNYLR;TTLCVSILER;TYLSEGPYYVKPVSTTAVEGAE;VFTAIANQPWAQK;YPIFVEK	1;1;1;1;1;1;1;1;1;1;1;1;1;1;1;1;1;1;1	19	82	0.4821	500849;500850;500851;500844;500847;500843;500848;500846;500820;80320;80325;80326;80327;201828;201824;646779;646776;646769;651978;548043;548050;548039;548034;548063;548054;548440;170531;170527;170524;132858;132857;132856;669781;669804;670215;165239;165241;422007;422009;422002;421995;422004;422003;421997;422008;422012;349199;340003;339993;339999;349197;339997;349711;556001;556371;556010;556005;3209…	-	26S proteasome non-ATPase regulatory subunit 5 OS=Homo sapiens GN=PSMD5 PE=1 SV=3
2408_1	sp|Q9Y5L0|TNPO3_HUMAN	66.2819	0	104136	AIHNICSVCR;ASFWLGELQR;DHMAQHFNGLLEIAR;DSLLTHIQNLK;ETTVGAVTVTHK;GCVQTLVEK;GTALVLAR;HTNPIVENGQTHPCQK;IFTELCETFLEK;IQTSFYELPTDSHASLR;LAVIFR;LLSQEPSNGISSDPTVFLDR;LPETVHTAVR;SPVTLLR;SVHAWEISDQLLQIR	1;1;1;1;1;1;1;1;1;1;1;1;1;1;1	15	20	0.1928	261345;261342;249303;546632;546625;292279;269381;269375;148117;40331;591784;432869;632210;632190;9385;694240;196441;34342;34336;565951	-	Transportin-3 OS=Homo sapiens GN=TNPO3 PE=1 SV=3
2195_2	sp|Q8N139|ABCA6_HUMAN	89.9764	0	184167	DAKPNPEEPIDEDEDIQTER;DQVWSLLR;DYILELK;EIDAEHPSDDYFEPVAPEFQGK;ENLSLFAK;EQEVGNFDEEIDTTMR;ETSQVTLVHTEILK;EVEQEVQR;HNFNLEEYSLSQCTLEK;LFPQAAGQER;LHEQLNVPVQK;LPVADVYPLSQTFHK;LTAGITR;LVYTLPLER;MISGITKPTAGEVELK;NLSEMQDLEEIRK;NVQFPGMAPQNLGR;TALAPLLK;TATALTTSILDEKPVIIASCLHK;VAIMVSGR;VFLELSK;VKETSQVTLVHTEILK	1;1;1;1;1;1;1;1;1;1;1;1;1;1;1;1;1;1;1;0;1;1	21	30	0.1626	735613;140498;81680;770007;94822;613183;468719;468784;140293;677054;677537;192174;305255;529190;529180;529195;529782;529771;14801;184917;508372;471832;432059;432090;441178;51013;51019;762695;54071;55305;578366	-	ATP-binding cassette sub-family A member 6 OS=Homo sapiens GN=ABCA6 PE=1 SV=2
2195_1	sp|O94911|ABCA8_HUMAN	44.1356	0	179130	GSVTIYNNK;LFPQAAR;LIYTLPLER;LPVEDVQPLAQAFFK;LTGVCPQSNVQFDFLTVR;NLAQVEPLHAEILR;VAIMVSGR;VASTPFLAGK;VFLSQGK;VITGDTKPTAGQVLLK;YSSLMVYK	1;1;1;1;1;1;0;1;1;1;1	10	14	0.0765	130033;41076;193166;522665;668810;669057;471218;471217;471612;54071;127226;31958;490528;490529;127045	-	ATP-binding cassette sub-family A member 8 OS=Homo sapiens GN=ABCA8 PE=1 SV=3
934_1	sp|P00390|GSHR_HUMAN	91.5126	0	56220.9	ADFDNTVAIHPTSSEELVTLR;ALLTPVAIAAGR;EDSKLDYNNIPTVVFSHPPIGTVGLTEDEAIHK;GHAAFTSDPKPTIEVSGK;GHAAFTSDPKPTIEVSGKK;GHIIVDEFQNTNVK;GIYAVGDVCGK;KTLSGLEVSMVTAVPGR;LFEYKEDSK;LGGTCVNVGCVPK;LGIQTDDKGHIIVDEFQNTNVK;LNAIYQNNLTK;MVCANKEEK;QEPQPQGPPPAAGAVASYDYLVIGGGSGGLASAR;SFDSMISTNCTEELENAGVEVLK;SHIEIIR;TSLMIR;TYSTSFTPMYHAVTK;VVGIHMQGLGCDEMLQGFAVAVK	1;1;1;1;1;1;1;1;1;1;1;1;1;1;1;1;1;1;1	19	47	0.5383	729830;729821;729833;730062;216264;216263;216265;216262;216261;872253;872252;585020;585017;633750;633758;476848;207102;207065;543569;219330;337948;337936;763014;763427;763161;763009;763169;763168;297336;297343;297866;297874;298221;187653;851270;851331;779817;779808;780057;70716;16547;538430;538465;538439;538450;538456;758413	-	Glutathione reductase, mitochondrial OS=Homo sapiens GN=GSR PE=1 SV=2
95_1	sp|Q04724|TLE1_HUMAN	31.4519	0	83148.4	DNLLNAWR;FTIPESLDR;IKEEFQFLQAQYHSLK;LNTICAQVIPFLSQEHQQQVAQAVER;LWTGGLDNTVR;SPVSQLDCLNR;TPYGASIFQSK	1;1;1;1;1;1;1	7	7	0.1195	133018;168659;646022;832484;262505;295381;244549	-	Transducin-like enhancer protein 1 OS=Homo sapiens GN=TLE1 PE=1 SV=2
2624_1	sp|Q15057|ACAP2_HUMAN	10.9967	0.000204499	87973.2	AALEEVEGDVAELELK;AVQTSIATAYR;QFMNGIR	1;1;1	3	5	0.0437	529070;529163;529075;233751;69567	-	Arf-GAP with coiled-coil, ANK repeat and PH domain-containing protein 2 OS=Homo sapiens GN=ACAP2 PE=1 SV=3
975_1	sp|O94901|SUN1_HUMAN	35.5101	0	90007.3	DLQLQILR;FSSQFVSK;GSQGYLVVR;LLFSEDQQGGSLEQLLQR;MSHLEDILGK;QLPTSEAVVSAVSEAGASGITEAQAR;RPDDTAFQIVELR;TLSPTGNISSAPK	1;1;1;1;1;1;1;1	8	10	0.1293	131892;97554;121797;662743;209296;771689;771688;448728;448722;286071	-	SUN domain-containing protein 1 OS=Homo sapiens GN=SUN1 PE=1 SV=3
255_1	sp|Q53GS7|GLE1_HUMAN	7.94248	0.000581846	79785.5	AATIPVSQISTIAGSK;VGDLILAHLHK	1;1	2	2	0.0387	440928;255084	-	Nucleoporin GLE1 OS=Homo sapiens GN=GLE1 PE=1 SV=2
6671_1	sp|Q9BTT0|AN32E_HUMAN	18.3485	0.000204499	30673.8	CPNLTYLNLSGNK;DLSTVEALQNLK;IKDLSTVEALQNLK	1;1;1	3	8	0.1007	413146;321294;454661;454656;454660;454663;454658;454657	-	Acidic leucine-rich nuclear phosphoprotein 32 family member E OS=Homo sapiens GN=ANP32E PE=1 SV=1
4200_2	sp|O75475|PSIP1_HUMAN	15.5772	0.000204499	60066.7	DFKPGDLIFAK;FSSQQAATK;GYPHWPAR;KGFNEGLWEIDNNPK	1;1;0;1	3	6	0.0811	274399;274398;274410;274402;116706;123892;123894;550894	-	PC4 and SFRS1-interacting protein OS=Homo sapiens GN=PSIP1 PE=1 SV=1
3386_1	sp|Q96S52|PIGS_HUMAN	22.8	0.000204499	61617.2	ASLPYSQISGLNALQLR;DGAPVATNAFHSPR;EAFNIIGR;ISNIVIKDDVASEVYK;VMEVFLAQLR	1;1;1;1;1	5	7	0.1171	580686;383736;94210;565106;565120;565601;248828	-	GPI transamidase component PIG-S OS=Homo sapiens GN=PIGS PE=1 SV=3
6034_1	sp|Q96N46|TTC14_HUMAN	10.3333	0.000204499	88264.5	LGIDESNPPSLMR;LGVISSEELPLYYR	1;1	2	2	0.0351	377040;489507	-	Tetratricopeptide repeat protein 14 OS=Homo sapiens GN=TTC14 PE=1 SV=1
6940_1	sp|P43251|BTD_HUMAN	9.66216	0.000204499	61093.3	LSSGLVTAALYGR;VDLITFDTPFAGR	1;1	2	2	0.0479	307110;390418	-	Biotinidase OS=Homo sapiens GN=BTD PE=1 SV=2
7747_1	sp|Q7Z3V4|UBE3B_HUMAN	5.60255	0.00504172	123019	MLEDGYEQLR;SIIKPEWIR	1;1	2	2	0.0178	275670;209031	-	Ubiquitin-protein ligase E3B OS=Homo sapiens GN=UBE3B PE=1 SV=3
7810_1	sp|O00461|GOLI4_HUMAN	30.0166	0	81831.3	AHQDIHTQLQDVK;AKEDFLVYK;FQSPYEEQLEQQR;LKETVYNLR;SALAAAQTQVAEYK;YLQLQQEK;YSALNVQHQMLK	1;1;1;1;1;1;1	7	10	0.1121	435339;190022;512206;205619;389864;389877;389913;154875;379290;378787	-	Golgi integral membrane protein 4 OS=Homo sapiens GN=GOLIM4 PE=1 SV=1
8554_1	sp|Q5HYI7|MTX3_HUMAN	14.8774	0.000204499	35071.2	ECLNLLSNR;GQPPLYHLR;VNVIDNTWR;VQLQEHLK	1;1;1;1	4	4	0.1122	193586;170637;192202;129797	-	Metaxin-3 OS=Homo sapiens GN=MTX3 PE=1 SV=2
8160_1	sp|P61769|B2MG_HUMAN	20.9373	0.000204499	13705.9	IEKVEHSDLSFSK;IQVYSR;VEHSDLSFSK;VNHVTLSQPK	1;1;1;1	4	18	0.2437	427372;27434;27430;27422;212582;212584;212579;212577;196418;196906;196435;196445;196432;196429;196437;196419;196440;196454	-	Beta-2-microglobulin OS=Homo sapiens GN=B2M PE=1 SV=1
5884_1	sp|P02751|FINC_HUMAN	276.38	0	262460	DDKESVPISDTIIPAVPPPTDLR;DTLTSRPAQGVVTTLENVSPPR;DTLTSRPAQGVVTTLENVSPPRR;EATIPGHLNSYTIK;EESPLLIGQQSTVSDVPR;EINLAPDSSSVVVSGLMVATK;ESKPLTAQQTTK;ESVPISDTIIPAVPPPTDLR;EYLGAICSCTCFGGQR;FGFCPMAAHEEICTTNEGVMYR;FLATTPNSLLVSWQPPR;FTQVTPTSLSAQWTPPNVQLTGYR;GDSPASSKPISINYR;GEWTCIAYSQLR;GLKPGVVYEGQLISIQQYGHQEVTR;GNLLQCICTGNGR;HHPEHFSGRPR;HTSVQTTSSGSGPFTDVR;HYQINQQWER;IAWESPQGQVSR;ISCTIANR;ITCTSR;ITGYIIK;ITYGETG…	1;1;1;1;1;1;1;1;1;1;1;1;1;1;1;1;1;1;1;1;1;1;1;1;1;1;1;1;1;1;1;1;1;1;1;1;1;1;1;1;1;1;1;1;1;1;1;1;1;1;1;1;1;1	54	152	0.321	761467;761468;761466;735327;735325;735328;735326;764954;765168;765165;440795;441297;628196;628212;628188;679165;678799;678793;678804;678801;321741;321760;678813;678814;599588;787253;789188;618248;618241;618258;618529;618551;796773;796646;465068;465124;465107;407907;407908;810486;810637;396244;396253;396747;397446;396258;335495;335486;593385;593389;593381;593365;593400;593376;593388;593372;593377;…	-	Fibronectin OS=Homo sapiens GN=FN1 PE=1 SV=4
6631_1	sp|Q9BXW7|CECR5_HUMAN	40.2603	0	46291.8	ATHDGAPELGAGGTR;IEGVLLLGEPVR;LVNSQGQLR;LYAVGDNPMSDVYGANLFHQYLQK;MLVSGQGPVMENAQGLGFR;NPQSTEPVLGGGEPPFHGHR;NVVTVDELR;VIPAALK;VPVVFVTNAGNILQHSK	1;1;1;1;1;1;1;1;1	9	23	0.3121	366388;299138;139400;139374;139405;802979;640472;640466;645365;645372;645360;645331;645689;677348;677358;677353;152197;5911;577707;577703;577700;577705;578080	-	Cat eye syndrome critical region protein 5 OS=Homo sapiens GN=CECR5 PE=1 SV=1
3101_1	sp|Q9UGT4|SUSD2_HUMAN	30.2388	0	90149.7	AGTWLAVHPNK;FKDSIQTLGHVDSSGQVHCVSPLLYESGR;HDPTFEPLFPSETTLNPSLAQEAAK;IPFTVSLDNGHSFPR;LCGDDHFCNFDVAATGSLSTGTATR;MSSPTDASVICR;YGSGQQCCYTADGTQLLTADSSGGSTPDRGHDWGAPPFR	1;1;1;1;1;1;1	7	10	0.1898	241759;849680;802673;802800;514929;514940;514930;793979;316568;884128	-	Sushi domain-containing protein 2 OS=Homo sapiens GN=SUSD2 PE=1 SV=1
3529_1	sp|Q9Y697|NFS1_HUMAN	85.9333	0	50163.9	AIGTDEDLAHSSIR;CIQHVK;DVALSSGSACTSASLEPSYVLR;EIIFTSGATESNNIAIK;ELEAAIQPDTSLVSVMTVNNEIGVK;FTTEEEVDYTVEK;GVGAIYIR;HLITTQTEHK;IDLMSISGHK;KVYFHTDAAQAVGK;LIQNIMK;QQVASLIGADPR;SGIIDLK;SLEAEGFQVTYLPVQK;SLPDVVMNGDPK;THAYGWESEAAMER;VRVEALQSGGGQER;VYFHTDAAQAVGK	1;1;1;1;1;1;1;1;1;1;1;1;1;1;1;1;1;1	18	38	0.4836	408506;408495;33641;719139;719132;571468;571453;571953;571940;792058;463680;463678;61602;61606;250205;250216;250209;182826;192142;435967;435963;435960;74730;276399;276400;19361;19350;19348;571944;572361;571939;571933;571927;285442;488454;409098;409103;364786	-	Cysteine desulfurase, mitochondrial OS=Homo sapiens GN=NFS1 PE=1 SV=3
4097_1	sp|Q93074|MED12_HUMAN	6.77281	0.00169747	242928	IVDGAVFAVLK;QLQQQLSNTQPQPSTNIFGRY;SLSAEWLGVLK	1;1;1	3	3	0.0198	202783;756697;247039	-	Mediator of RNA polymerase II transcription subunit 12 OS=Homo sapiens GN=MED12 PE=1 SV=4
6044_1	sp|Q9NRG9|AAAS_HUMAN	5.49011	0.00521195	59536.3	FSPVLGR;ILATTPSAVFR	1;1	2	3	0.033	31018;31026;230756	-	Aladin OS=Homo sapiens GN=AAAS PE=1 SV=1
7136_1	sp|Q8N2F6|ARM10_HUMAN	32.2361	0	37516.6	ALNALNNLSVNVENQIK;ALVDHHDAEVK;INHSNQSIK;LLLNLSENPAMTEGLLR;LLYLLESTEDPVIIER;VLTLFQNIK;VVTIIPK	1;1;1;1;1;1;1	7	10	0.2507	589579;589575;263566;150376;602098;608732;608729;167846;167848;28872	-	Armadillo repeat-containing protein 10 OS=Homo sapiens GN=ARMC10 PE=1 SV=1
1126_1	sp|Q15942|ZYX_HUMAN	24.5698	0.000204499	61238.2	CNTCGEPITDR;FSPVTPK;GPPASSPAPAPK;LGHPEALSAGTGSPQPPSFTYAQQR;QNVAVNELCGR;SPGAPGPLTLK;VSSGYVPPPVATPFSSK	1;1;1;1;1;1;1	7	10	0.1643	315886;30935;168216;783801;783813;784136;784134;279254;149528;531729	-	Zyxin OS=Homo sapiens GN=ZYX PE=1 SV=1
1397_1	sp|P46782|RS5_HUMAN	47.8596	0	22862.1	AQCPIVER;GSSNSYAIK;KAQCPIVER;LTNSMMMHGR;QAVDVSPLR;QAVDVSPLRR;RQAVDVSPLR;TIAECLADELINAAK;VNQAIWLLCTGAR;YLPHSAGR	1;1;1;1;1;1;1;1;1;1	10	97	0.3676	118712;118715;118707;96271;96272;96280;96558;96273;96258;96267;96276;96241;96559;182861;182858;182860;182863;182864;241429;241416;241433;231380;241424;241435;241443;231378;241427;241426;241434;241430;241436;232210;241431;241438;231383;241439;231375;241444;232208;251022;242104;241428;241422;251024;231381;241432;231377;241421;241437;251018;241440;251020;231410;124503;124515;124498;124505;208435;208…	-	40S ribosomal protein S5 OS=Homo sapiens GN=RPS5 PE=1 SV=4
1245_1	sp|O43395|PRPF3_HUMAN	62.5437	0	77480.9	AADHLKPFLDDSTLR;ELDELKPWIEK;FVDKLFEAVEEGR;LFEAVEEGR;LKEDISQGVHISVYR;LPIGNTIQPSQAATFMNDAIEK;LQAEISQAAR;NLSNPAKK;QLSFISPPTPQPK;RELDELKPWIEK;TGIHTSTR;VLGFSEPTVVTAALNCVGK;VLGTEAVQDPTK;VLGTEAVQDPTKVEAHVR	1;1;1;1;1;1;1;1;1;1;1;1;1;1	14	21	0.224	520851;520877;360203;438211;438205;154764;543144;543141;543140;740030;740038;174105;72627;383377;446815;73208;631143;631138;277752;626166;626165	-	U4/U6 small nuclear ribonucleoprotein Prp3 OS=Homo sapiens GN=PRPF3 PE=1 SV=2
185_1	sp|Q8IV50|LYSM2_HUMAN	8.58629	0.00039093	23449	AGDTLQGIALK;YGVTMEQIK	1;1	2	2	0.093	174210;164662	-	LysM and putative peptidoglycan-binding domain-containing protein 2 OS=Homo sapiens GN=LYSMD2 PE=1 SV=1
3109_1	sp|Q8IUX1|T126B_HUMAN	5.07477	0.00789293	25926.4	LFVIDALYSDNISK	1	1	1	0.0609	468597	-	Complex I assembly factor TMEM126B, mitochondrial OS=Homo sapiens GN=TMEM126B PE=1 SV=2
8394_1	sp|Q96J01|THOC3_HUMAN	31.3606	0	38746.8	CIATVNTK;EFLAHSAK;GHGDSVDQLCWHPSNPDLFVTASGDK;TASVFLLEK;TLSFSHDGK;VHSVAWSCDGR;YVLGMQELFR	1;1;1;1;1;1;1	7	12	0.2308	88402;88429;86109;815403;815305;136314;136306;127895;286306;286302;286303;276835	-	THO complex subunit 3 OS=Homo sapiens GN=THOC3 PE=1 SV=1
4888_1	sp|Q9H0R1|AP5M1_HUMAN	16.7366	0.000204499	54731.9	ALLFELR;AVWLISHEPGTPLCGTVR;LLDDDKDFVESR;QGIADTWQVVGTVTCK	1;1;1;1	4	4	0.1082	67850;641078;390266;551700	-	AP-5 complex subunit mu-1 OS=Homo sapiens GN=AP5M1 PE=1 SV=2
5182_1	sp|Q9Y6V7|DDX49_HUMAN	5.07477	0.00789293	54192	ELAYQIAEQFR	1	1	1	0.0228	342115	-	Probable ATP-dependent RNA helicase DDX49 OS=Homo sapiens GN=DDX49 PE=1 SV=1
6284_1	sp|P14324|FPPS_HUMAN	47.7167	0	48244.6	ATPEQYQILK;CSWLVVQCLQR;ELVEPR;EVLEYNAIGGK;IGTDIQDNK;IGTDIQDNKCSWLVVQCLQR;KQDADSLQR;LKEVLEYNAIGGK;QDFVQHFSQIVR;VLTEDEMGHPEIGDAIAR	1;1;1;1;1;1;1;1;1;1	10	26	0.21	239789;239815;239800;239844;388505;18084;241058;134127;754313;160988;379990;379985;418765;418759;418763;418764;418746;419370;627340;633300;633297;627345;627337;633302;627344;633301	-	Farnesyl pyrophosphate synthase OS=Homo sapiens GN=FDPS PE=1 SV=4
3811_1	sp|Q6DD87|ZN787_HUMAN	36.2154	0	40517.7	AQHGDGLGAAGGEEPAHICVECGEGFVQGAALR;GFGHGAGLLAHQR;IHAVGAPSVCSSCGQSYYR;IHTGEKPYTCPDCGR;LHPELSGPGVAAK;SFSHWSK;TFSQSSHLVQHR	1;1;1;1;1;1;1	7	10	0.2924	857133;314875;673473;673465;563785;288361;288366;76194;376106;376101	-	Zinc finger protein 787 OS=Homo sapiens GN=ZNF787 PE=1 SV=3
3389_1	sp|Q7Z569|BRAP_HUMAN	10.6171	0.000204499	67261.2	FVAPFNEVIEQMK;VAIIHQHLGR	1;1	2	2	0.0389	444656;210073	-	BRCA1-associated protein OS=Homo sapiens GN=BRAP PE=1 SV=2
2151_1	sp|Q8WUW1|BRK1_HUMAN	19.2306	0.000204499	8739.46	EIHQDWANR;EYIEIITSSIK;EYIEIITSSIKK;IADFLNSFDMSCR;KIADFLNSFDMSCR;RIEYIEAR	1;1;1;1;1;1	6	7	0.56	225648;299544;374886;456398;456408;523923;154948	-	Protein BRICK1 OS=Homo sapiens GN=BRK1 PE=1 SV=1
822_1	sp|Q68CQ7|GL8D1_HUMAN	8.2566	0.00039093	41909	GAGNQYNYIGYLDYK;SWLNSDSLK;VKEDPDQGESMKPLTFAR	1;1;1	3	3	0.1132	540664;154745;658544	-	Glycosyltransferase 8 domain-containing protein 1 OS=Homo sapiens GN=GLT8D1 PE=1 SV=2
7674_1	sp|P51149|RAB7A_HUMAN	70.0879	0	23474.8	AQAWCYSK;ATIGADFLTK;DEFLIQASPR;DPENFPFVVLGNK;EAINVEQAFQTIAR;EVMVDDR;FQSLGVAFYR;FSNQYK;GADCCVLVFDVTAPNTFK;LVTMQIWDTAGQER;NNIPYFETSAK;TLDSWRDEFLIQASPR;TSLMNQYVNK;VIILGDSGVGK	1;1;1;1;1;1;1;1;1;1;1;1;1;1	14	76	0.715	138647;149125;149127;149123;149116;149122;149121;230377;403807;403821;403824;403837;403820;403840;403813;403826;403798;404393;403768;403776;404371;404398;403844;464013;464009;464059;464501;464022;464027;464010;464043;464584;464512;68264;238064;238050;238046;238051;34479;647429;647427;647428;647426;647432;647868;493827;493799;493829;493821;493815;502657;502674;502648;502647;502641;292552;292559;29…	-	Ras-related protein Rab-7a OS=Homo sapiens GN=RAB7A PE=1 SV=1
7427_1	sp|Q8N5V2|NGEF_HUMAN	21.5356	0.000204499	82444.7	LLVQNILK;SLNLLVSHFMENER;SVNEPLTLNIPWSR;SVPIISHSR;YQVFDSAPR	1;1;1;1;1	5	6	0.0761	103008;516057;482406;130257;171503;171515	-	Ephexin-1 OS=Homo sapiens GN=NGEF PE=1 SV=2
5260_1	sp|Q9BU02|THTPA_HUMAN	27.4102	0	25550	CPGAAGVLGPHTEYK;KFLPGPGTEER;LIVYLQR;LLEVNSSR;LQELGGTLEYR;LVLLGADEEEPQLR	1;1;1;1;1;1	6	6	0.287	447100;261987;87310;93538;289984;459809	-	Thiamine-triphosphatase OS=Homo sapiens GN=THTPA PE=1 SV=3
3448_2	sp|P15531|NDKA_HUMAN	20.53	0.000204499	17137.7	DRPFFAGLVK;FMQASEDLLK;FMQASEDLLKEHYVDLK;GDFCIQVGR;GLVGEIIK;GLVGEIIKR;NIIHGSDSVESAEK;TFIAIKPDGVQR;VMLGETNPADSKPGTIR	1;1;1;0;0;0;1;0;0	4	16	0.5789	213630;213623;213627;213619;213620;213634;213631;213625;213624;213614;234187;664156;155832;155836;155825;155835;155831;155824;155808;51806;51812;51823;51836;124638;124623;124628;124626;408949;408946;408951;409423;328791;328788;328792;328790;328789;328787;328796;328775;328770;561501;561499;568737;568740;569094;561507;561498;568719;561475;562207;561517;561504;569088;561502	-	Nucleoside diphosphate kinase A OS=Homo sapiens GN=NME1 PE=1 SV=1
3448_1	sp|P22392|NDKB_HUMAN	5.83195	0.00384481	17286.9	DRPFFPGLVK;GDFCIQVGR;GLVGEIIK;GLVGEIIKR;QHYIDLK;TFIAIKPDGVQR;VMLGETNPADSKPGTIR	1;0;0;0;1;0;0	2	5	0.4211	230703;230712;230706;230705;155832;155836;155825;155835;155831;155824;155808;51806;51812;51823;51836;124638;124623;124628;124626;93097;328791;328788;328792;328790;328789;328787;328796;328775;328770;561501;561499;568737;568740;569094;561507;561498;568719;561475;562207;561517;561504;569088;561502	-	Nucleoside diphosphate kinase B OS=Homo sapiens GN=NME2 PE=1 SV=1
8080_1	sp|Q9H307|PININ_HUMAN	20.3453	0.000204499	81565	FKQESTVATER;IFGLLMGTLQK;LEVQAEEER;RIEFAEQINK;VELAQLQEEWNEHNAK	1;1;1;1;1	5	5	0.0795	299366;257607;183911;272605;622494	-	Pinin OS=Homo sapiens GN=PNN PE=1 SV=4
8001_1	sp|P15848|ARSB_HUMAN	18.5806	0.000204499	59649.4	GVGFVASPLLK;IELLHNIDPNFVDSSPCPR;LLPQLLK;NMYSTNIFTK	1;1;1;1	4	5	0.0882	175324;707519;50331;50330;256310	-	Arylsulfatase B OS=Homo sapiens GN=ARSB PE=1 SV=1
5949_1	sp|Q14669|TRIPC_HUMAN	73.6151	0	220296	ADLGLWR;EGIFAVDTMLK;GNAQNTDGAIWQWR;HLAESESLLTSPPK;LFLQFVTGSPR;LLDTNPEINQSDSQDSR;LPVGGFR;LVDNFQHEENLLQQVASK;MNNCLSQMEQFPVK;MSQLFHR;SIVSESDVSSFEIQHSGFVK;SLNPPLTIVR;SSAVVVDAIPVFLEK;SVYHLEDIVR;TCPFFFPFDTR;TIGSGASSK;VEPVGNAPLLALVHK	1;1;1;1;1;1;1;1;1;1;1;1;1;1;1;1;1	17	26	0.1054	52882;258705;477673;421434;281540;281534;619881;19326;677128;677135;534495;93808;696089;696079;696069;188615;188614;455854;261992;262036;380113;380118;42946;447445;447446;447447	-	E3 ubiquitin-protein ligase TRIP12 OS=Homo sapiens GN=TRIP12 PE=1 SV=1
2528_1	sp|P40692|MLH1_HUMAN	6.89434	0.00151143	84548	IAAGEVIQRPANAIK;TLPNASTVDNIR	1;1	2	2	0.0357	444409;302650	-	DNA mismatch repair protein Mlh1 OS=Homo sapiens GN=MLH1 PE=1 SV=1
3755_1	sp|Q9P299|COPZ2_HUMAN	12.8862	0.000204499	23533	ADDGGLTEQSVAQVLQSAK;AVFILDNDGRR;LQEPSLYTIK	1;1;1	3	3	0.1905	614429;288273;240447	-	Coatomer subunit zeta-2 OS=Homo sapiens GN=COPZ2 PE=2 SV=1
4323_1	sp|Q16740|CLPP_HUMAN	37.2581	0	30160.6	ALPLIPIVVEQTGR;AYDIYSR;GQATDIAIQAEEIMK;HSLPNSR;IMIHQPSGGAR;QLYNIYAK;VLVHPPQDGEDEPTLVQK;YMSPMEAQEFGILDK	1;1;1;1;1;1;1;1	8	17	0.343	419991;419992;79539;478275;43935;43934;224775;224771;224783;224773;235013;138410;138407;643562;549852;549866;549870	-	ATP-dependent Clp protease proteolytic subunit, mitochondrial OS=Homo sapiens GN=CLPP PE=1 SV=1
5224_1	sp|P33176|KINH_HUMAN	109.672	0	109617	AAEMMASLLK;DQDNMQAELNR;ELQTLHNLR;ELQTLHNLRK;FQGEDTVVIASKPYAFDR;FRPLNESEVNR;FRPLNESEVNRGDK;FVCSPDEVMDTIDEGK;HVAVTNMNEHSSR;IKEAVR;IRDLLDVSK;ISFLENNLEQLTK;LFVQDLATR;LHDPEGMGIIPR;LITDLQDQNQK;QAVEQQIQSHR;QISSLRDEVEAK;QLDDKDEEINQQSQLVEK;SAEIDSDDTGGSAAQK;SHSIFLINVK;SLTEYLQNVEQK;STLLFGQR;TNLSVHEDKNR;VFQSSTSQEQVYNDCAK	1;1;1;1;1;1;1;1;1;1;1;1;1;1;1;1;1;1;1;1;1;1;1;1	24	33	0.2773	163002;322419;196948;274930;274932;656814;657167;656825;656820;338078;338119;501163;584833;407084;407074;415007;407080;7964;160060;443410;162165;323290;311613;311627;317306;345941;689564;444465;219094;390333;94876;309575;640332	-	Kinesin-1 heavy chain OS=Homo sapiens GN=KIF5B PE=1 SV=1
4152_1	sp|Q9Y3C4|TPRKB_HUMAN	33.5043	0	19648.5	AVHLYK;MQLTHQLDLFPECR;NLPEIMNITEVK;NLPEIMNITEVKK;QINQEYLISQVEGHQVSLK;QLTHQLDLFPECR;VTLLLFK	1;1;1;1;1;1;1	7	19	0.3371	14270;562557;360761;360758;432264;432244;432269;432270;432265;432262;432259;704634;704868;498892;54641;54642;54639;54643;54640	-	EKC/KEOPS complex subunit TPRKB OS=Homo sapiens GN=TPRKB PE=1 SV=1
1425_1	sp|Q9NZN5|ARHGC_HUMAN	77.8159	0	173125	AYHSGEGHMPFR;DDNGFGLTVSGDNPVFVQSVK;DIIPTQMQR;EGILSPSELRK;FQTFVQDAESNPLCR;IEADLEHLK;ILASTADSK;KVEESYTILCQR;LSTVLVR;MIHEGPLVWK;QILNYVNQAVK;QLLVQQLGLTEK;RQEVINELFYTER;SMGLTLAESELTK;TASQGPQTDSVIQNSENIK;VLDQVFYQR;VTEHGTPKPFR;YPLLLDNIAK	1;1;1;1;1;1;1;1;1;1;1;1;1;1;1;1;1;1	18	25	0.138	353826;353828;699889;699611;699606;183391;261087;572926;572892;164444;87826;430498;35224;251391;296037;296015;343519;519890;349077;649002;649328;225362;283918;283916;220411	-	Rho guanine nucleotide exchange factor 12 OS=Homo sapiens GN=ARHGEF12 PE=1 SV=1
2520_1	sp|Q6P6B7|ANR16_HUMAN	12.3813	0.000204499	39258.9	ALKEELQAAGGCPGPAGDTLLHCAAR;ATSTHLTALHYAAK;SALHLACAGQHLACAK	1;1;1	3	3	0.1551	792707;408611;525384	-	Ankyrin repeat domain-containing protein 16 OS=Homo sapiens GN=ANKRD16 PE=1 SV=1
4904_1	sp|Q9C0E2|XPO4_HUMAN	52.387	0	130056	ADLTHLLSPQMGK;ALVLGGFAHMDTETK;AQETDSPLFLATR;HQQQLLASPGSSTVDNK;LADAFNK;LHGQLQR;LLSAILR;LTASSTPPTLDR;LTASSTPPTLDRK;NLTANGVASR;SPPLNFLSSPVQR;VLMAPPSMVNNEQR	1;1;1;1;1;1;1;1;1;1;1;1	12	17	0.1121	367165;463890;389129;572682;572264;573310;31815;63125;34415;34425;34423;278266;353025;353035;133606;384461;461577	-	Exportin-4 OS=Homo sapiens GN=XPO4 PE=1 SV=2
300_1	sp|Q05D32|CTSL2_HUMAN	16.9268	0.000204499	52966.1	DLNILGR;EHCVCVQGNYIK;LIPFLEK;LVELNEDVRPHIR	1;1;1;1	4	6	0.0837	40186;420051;67024;464175;464180;464173	-	CTD small phosphatase-like protein 2 OS=Homo sapiens GN=CTDSPL2 PE=1 SV=2
8042_1	sp|Q9Y2I1|NISCH_HUMAN	10.244	0.000204499	166524	LISLLAR;LLAAFPGVTPR;LSSLEGLHTK	1;1;1	3	4	0.0186	34414;209038;172681;172679	-	Nischarin OS=Homo sapiens GN=NISCH PE=1 SV=3
7313_1	sp|Q9H9A5|CNO10_HUMAN	13.7333	0.000204499	82257.5	LLNSSNIAEHPGFMK;SNQTTTDNLR;SVMNTAGNSAPSLFLK	1;1;1	3	3	0.0551	500075;213268;488194	-	CCR4-NOT transcription complex subunit 10 OS=Homo sapiens GN=CNOT10 PE=1 SV=1
1290_1	sp|Q9UQN3|CHM2B_HUMAN	14.0968	0.000204499	23891.2	MAGAMSTTAK;SLPSASTSK;TLQTMQNFQK	1;1;1	3	5	0.1362	117071;75887;75883;266608;266623	-	Charged multivesicular body protein 2b OS=Homo sapiens GN=CHMP2B PE=1 SV=1
7581_1	sp|P05067|A4_HUMAN	8.04678	0.00039093	86888.1	AVIQHFQEK;THPHFVIPYR;VESLEQEAANER	1;1;1	3	3	0.0403	182325;282709;345768	-	Amyloid beta A4 protein OS=Homo sapiens GN=APP PE=1 SV=3
3950_1	sp|Q9BRX9|WDR83_HUMAN	18.7801	0.000204499	34320.8	AVVLWDVASGQVVR;DGQCTLVSSLDSTLR;FNVDGNYCLTCGSDK;LWNPLR	1;1;1;1	4	5	0.1587	415926;415925;496091;545579;39418	-	WD repeat domain-containing protein 83 OS=Homo sapiens GN=WDR83 PE=1 SV=1
3149_2	sp|O95782|AP2A1_HUMAN	137.168	0	107478	AADLLYAMCDR;ACNQLGQFLQHR;ALLLSTYIK;ALQVGCLLR;ANHPMDAEVTK;ASPDLVPMGEWTAR;DDVQGYAAK;DFLTPPLLSVR;EMGEAFAADIPR;FFQPTEMAAQDFFQR;FINLFPETK;GLAVFISDIR;GPGAGSALDDGR;IAGDYVSEEVWYR;ILVAGDSMDSVK;LEPNAQAQMYR;LINNAIK;LINNAIKNDLASR;LLQCYPPPEDAAVK;LPVTINK;LVECLETVLNK;MYLFYGNK;NADVELQQR;NNGVLFENQLLQIGVK;QIVSEMLR;QLSLPQQEAQK;QSAALCLLR;RDPSSNDINGGMEPTPSTVSTPSPSADLLGLR;SSPPVQFSLLHSK;THIDTVINALK;TSKEPVSR;TSVQFQNFSPT…	1;0;0;1;1;1;0;1;1;1;1;0;1;0;1;1;0;0;1;1;1;1;0;1;1;1;0;1;1;1;1;1;1;1;0;1;1;1;0	28	109	0.4729	301113;301107;401204;401212;401206;401196;401205;142845;142843;142844;142842;146439;146440;146442;146445;260711;260703;432821;116118;277890;277901;277887;277888;277895;277874;277886;306091;593067;593062;593060;599643;593061;593323;599657;599646;599665;599649;599660;593059;593044;599651;593064;593330;593069;593057;593329;593063;593041;187917;187932;187921;187938;177192;177196;177210;166192;461948;…	-	AP-2 complex subunit alpha-1 OS=Homo sapiens GN=AP2A1 PE=1 SV=3
3149_1	sp|O94973|AP2A2_HUMAN	113.712	0	103895	ACNQLGQFLQHR;AKHPMDTEVTK;ALLLSTYIK;AVDLLYAMCDR;AVEYLR;DDVQGYAAK;EMAEAFAGEIPK;FFQPTEMASQDFFQR;GLAVFISDIR;GPSTVTDLEDTKR;HPMDTEVTK;IAGDYVSEEVWYR;LEPNLQAQMYR;LINNAIK;LINNAIKNDLASR;LLQCYPPPDPAVR;LTECLETILNK;MFIFYGNK;NADVELQQR;NNGVLFENQLLQIGLK;QLSNPQQEVQNIFK;QSAALCLLR;SSPLIQFHLLHSK;THIETVINALK;THIETVINALKTER;TSPDLVPMGDWTSR;TSVSLAVSR;TTQIGCLLR;TVFEALQAPACHENLVK;VAILAEK;VIQIVINR;VIQIVINRDDVQGYAAK;YGGTFQN…	0;1;0;1;1;0;1;1;0;1;1;0;1;0;0;1;1;1;0;1;1;0;1;1;1;1;1;1;1;0;1;1;1;0	23	69	0.3781	401204;401212;401206;401196;401205;277261;277264;277267;142845;142843;142844;142842;318488;318479;21387;21364;21379;21388;21385;21371;21378;21384;21358;21377;116118;297643;605927;605565;599644;599647;600004;177192;177196;177210;371600;371591;159206;461948;461942;347970;339275;339234;34330;384534;430525;430532;430549;431079;322709;141737;166258;568102;507832;507841;507831;507840;507817;508281;5083…	-	AP-2 complex subunit alpha-2 OS=Homo sapiens GN=AP2A2 PE=1 SV=2
1052_3	sp|Q9H4A3|WNK1_HUMAN	24.6033	0.000204499	250640	DLLNHAFFQEETGVR;GLQHPNIVR;ILNVSNK;SQQQDDIEELETK;VPPAVIIPPAAPLSGR;VVECQLETHNR	1;0;1;1;1;1	5	7	0.0298	557919;148238;35105;449979;446137;446136;446135;351835	-	Serine/threonine-protein kinase WNK1 OS=Homo sapiens GN=WNK1 PE=1 SV=2
1052_2	sp|Q9BYP7|WNK3_HUMAN	6.34918	0.00317046	198292	EAVGNSLIKPSLNQLK;FCINQTIR;GLQHPNIVR	1;1;0	2	2	0.0183	526970;155994;148238	-	Serine/threonine-protein kinase WNK3 OS=Homo sapiens GN=WNK3 PE=1 SV=3
4190_1	sp|Q5T5P2|SKT_HUMAN	49.1258	0	213983	EPGTLVYIEKPR;GPITSYSK;HVTDGLLK;LCELEDFVEDLKK;QLQLQNQELLR;QVFAYSTATIPK;QVGEAVATLK;SASAYCNPSMQAEMHMEQSLYR;SLGVLYLQYGDETK;SMVVPGNATIPR	1;1;1;1;1;1;1;1;1;1	10	12	0.0628	361335;361337;63357;77940;488804;350982;317998;140016;783047;461660;268662;269377	-	Sickle tail protein homolog OS=Homo sapiens GN=KIAA1217 PE=1 SV=2
7540_1	sp|Q32MZ4|LRRF1_HUMAN	22.072	0.000204499	89198.7	AGGEELDEGVAK;DSLAEVEEK;HAHSILQFQFAEVK;HGIILNSEIATNGETSDTLNNVGYQGPTK	1;1;1;1	4	5	0.0792	229701;141699;498161;835194;835199	-	Leucine-rich repeat flightless-interacting protein 1 OS=Homo sapiens GN=LRRFIP1 PE=1 SV=2
8173_1	sp|P61086|UBE2K_HUMAN	47.8817	0	22392.6	DQWAAAMTLR;GEIAGPPDTPYEGGR;IENLCAMGFDR;IPETYPFNPPK;KIENLCAMGFDR;LWAHVYAGAPVSSPEYTK;NAVIVALSSK;QNPEMFK;VDLVDENFTELR;VDLVDENFTELRGEIAGPPDTPYEGGR;YQLEIK	1;1;1;1;1;1;1;1;1;1;1	11	21	0.505	221903;424940;317646;303872;303879;303858;400640;635483;635482;635468;133317;133326;133325;133314;81465;389062;826935;826938;827033;37425;37418	-	Ubiquitin-conjugating enzyme E2 K OS=Homo sapiens GN=UBE2K PE=1 SV=3
1298_1	sp|O14727|APAF_HUMAN	41.6435	0	141749	ADLPEQAHSIIKECK;DLAALLHDGIPVVSSSSGK;DSVSGITSYVR;IHVSPDFK;LDQDESFSQR;LQLINGR;LVNAIQQK;NCSQLQDLHKK;NTMFGHTNSVNHCR;SVLAAEAVR;TLQVFK;TVWHIQFTADEK	1;1;1;1;1;1;1;1;1;1;1;1	12	14	0.1042	540807;594427;235436;103639;258944;45237;91695;344278;508539;508534;508537;92747;16415;403026	-	Apoptotic protease-activating factor 1 OS=Homo sapiens GN=APAF1 PE=1 SV=2
3288_1	sp|Q14192|FHL2_HUMAN	41.2543	0	32170.6	CAGCTNPISGLGGTK;CSLSLVGR;ECFVCTACR;EDQLLCTDCYSNEYSSK;FDCHHCNESLFGK;FDCHHCNESLFGKK;GFLTER;GSSWHETCFICHR;HWHEACFHCSQCR;NSLVDKPFAAK;NSLVDKPFAAKEDQLLCTDCYSNEYSSK;QHAMQCVQCK	1;1;1;1;1;1;1;1;1;1;1;1	12	15	0.4158	412416;80883;246575;676993;677221;495351;495350;558630;10580;509623;574030;239289;239296;854761;296337	-	Four and a half LIM domains protein 2 OS=Homo sapiens GN=FHL2 PE=1 SV=3
5477_1	sp|Q9NYJ8|TAB2_HUMAN	14.3991	0.000204499	76446.6	EIDLFQAR;TQDTEDDEGAQWNCTACTFLNHPALIR;TSSTSSSVNSQTLNR	1;1;1	3	3	0.0722	127984;845188;452776	-	TGF-beta-activated kinase 1 and MAP3K7-binding protein 2 OS=Homo sapiens GN=TAB2 PE=1 SV=1
704_1	sp|Q9Y446|PKP3_HUMAN	6.87692	0.00151143	87029	LFNHANQEVQR;SVENAVCVLR	1;1	2	2	0.0263	334921;211466	-	Plakophilin-3 OS=Homo sapiens GN=PKP3 PE=1 SV=1
2986_1	sp|Q13084|RM28_HUMAN	17.364	0.000204499	30137.9	EFYSEILDKK;ERVEDVPIPIYFPPESQR;FGMDLK;LLEEKDPVPLFK;VWKPQLFER	1;1;1;1;1	5	9	0.2148	285498;693221;693240;5418;5416;5422;376810;376812;246901	-	39S ribosomal protein L28, mitochondrial OS=Homo sapiens GN=MRPL28 PE=1 SV=4
6932_1	sp|P02790|HEMO_HUMAN	43.5239	0	51643.3	FDPVRGEVPPR;GGYTLVSGYPK;LLQDEFPGIPSPLDAAVECHR;NFPSPVDAAFR;QGHNSVFLIK;RLWWLDLK;SGAQATWTELPWPHEK;SLGPNSCSANGPGLYLIHGPNLYCYSDVEK;VDGALCMEK;YYCFQGNQFLR	1;1;1;1;1;1;1;1;1;1	10	25	0.2987	283913;208784;208823;740957;740961;740962;740966;257372;257367;257378;209434;209428;209426;201406;583583;583571;583599;583589;583588;854597;854594;854595;142938;413964;413977	-	Hemopexin OS=Homo sapiens GN=HPX PE=1 SV=2
6127_1	sp|O75607|NPM3_HUMAN	6.11616	0.00351617	19331.4	NHDHQEIAVPVANLK	1	1	1	0.0843	514539	-	Nucleoplasmin-3 OS=Homo sapiens GN=NPM3 PE=1 SV=3
1691_1	sp|P01700|LV147_HUMAN	5.07477	0.00805208	12275.9	SGTSASLAISGLR	1	1	3	0.1111	257154;257151;257153	-	Immunoglobulin lambda variable 1-47 OS=Homo sapiens GN=IGLV1-47 PE=1 SV=2
3249_1	sp|O15228|GNPAT_HUMAN	12.3527	0.000204499	77138	AIQEHPVVLLPSHR;CSVLNSEEIHYVIK;CYTPLVYK	1;1;1	3	3	0.0529	467700;516868;151503	-	Dihydroxyacetone phosphate acyltransferase OS=Homo sapiens GN=GNPAT PE=1 SV=1
1335_1	sp|Q9UBU6|FA8A1_HUMAN	11.1909	0.000204499	44095.4	DDPQAEPQAPGRPTAPGLAAAAAADKLEPPR;TAAGISTPAPVAGLGPR	1;1	2	3	0.1162	837893;436609;436607	-	Protein FAM8A1 OS=Homo sapiens GN=FAM8A1 PE=1 SV=1
6462_1	sp|Q99707|METH_HUMAN	39.6563	0	140437	FVAGALGPTNK;GNNDILSITQPDVIYQIHK;IGPYTNFVNIGER;IMVLDGGMGTMIQR;IPLLIGGATTSK;TLRDEINAILQK;VIDLGVMTPCDK;YSAPVIHVLDASK	1;1;1;1;1;1;1;1	8	8	0.0838	167222;692339;406225;428731;227448;369103;330187;360247	-	Methionine synthase OS=Homo sapiens GN=MTR PE=1 SV=2
6897_1	sp|P55957|BID_HUMAN	31.6106	0	21981	DVFHTTVNFINQNLR;ELDALGHELPVLAPQWEGYDELQTDGNR;HLAQVGDSMDR;IEADSESQEDIIR;SIPPGLVNGLALQLR;VASHTPSLLR	1;1;1;1;1;1	6	30	0.4718	575637;575635;845202;845315;845222;845455;260713;419229;442923;442925;442918;442901;442917;442932;442908;442922;442907;442905;442931;442924;442938;442912;443489;443499;170694;170683;170687;170706;170690;170699	-	BH3-interacting domain death agonist OS=Homo sapiens GN=BID PE=1 SV=1
7507_1	sp|Q6P2E9|EDC4_HUMAN	53.191	0	151567	DHMGSVMAQVR;EAFQSVVLPAFEK;EPVLAQLR;FSPDIFSSVSVPPSLK;HSQEELLQR;IQEEILVHIR;LCTQLEGLQSTVTGHVER;LFQFLQAEPHNSLGK;LGTQEYLQQLESHMK;LTEHQVAEPPEDWPALIWQQQR;SCQAMFQQINDSFR	1;1;1;1;1;1;1;1;1;1;1	11	15	0.1078	261839;397668;96121;524959;207700;273955;652065;652063;536031;536044;536675;570139;793765;793761;537398	-	Enhancer of mRNA-decapping protein 4 OS=Homo sapiens GN=EDC4 PE=1 SV=1
353_1	sp|Q9HB21|PKHA1_HUMAN	21.0991	0.000204499	45524.9	AVSGAIVAQR;DNLFEIVTTSR;EDSFVWYMDNPQNLPSGSSR;TFYVQADSPEEMHSWIK;YFILDTR	1;1;1;1;1	5	5	0.1609	118475;298798;733254;664549;96692	-	Pleckstrin homology domain-containing family A member 1 OS=Homo sapiens GN=PLEKHA1 PE=1 SV=2
7175_1	sp|Q9Y3A4|RRP7A_HUMAN	10.0603	0.000204499	32314	ELLNFYAWQHR;LLSTCGLVQSVELQEKPDLAESPK	1;1	2	2	0.125	404333;789978	-	Ribosomal RNA-processing protein 7 homolog A OS=Homo sapiens GN=RRP7A PE=1 SV=2
2864_1	sp|Q00341|VIGLN_HUMAN	261.502	0	141368	AFHPFIAGPYNR;AKPEYHK;ANSFTVSSVAAPSWLHR;APDMSSSEEFPSFGAQVAPK;ASVITQVFHVPLEER;DCVEAAK;DFSVQIK;DKFPEVIINFPDPAQK;DLANIAEVEVSIPAK;DMNQFGEGEQAK;DQGLSIMVSGK;EENAVHSTEPVVQENGDEAGEGR;EIAEEYGGVMVSFPR;ELLELASR;ELQAEQEDR;EQLAQAVAR;FPDREENAVHSTEPVVQENGDEAGEGR;GAVITQIR;GNSLQEILER;HEVLLISAEQDKR;ICLEIMQR;IDLPAENSNSETIIITGK;IEGDPQGVQQAK;IMDEFK;INIPPPSVNR;IQIPRPDDPSNQIK;ITLEGPTEDVNVAQEQIEGMVK;ITQQMPK;IVGELEQMVSEDV…	1;1;1;1;1;1;1;1;1;1;1;1;1;1;1;1;1;1;1;1;1;1;1;1;1;1;1;1;1;1;1;1;1;1;1;1;1;1;1;1;1;1;1;1;1;1;1;1;1;1;1;1;1;1;1;1;1	57	198	0.4874	354537;354574;354519;354516;73220;579966;579953;579962;579978;668697;668694;668688;673050;673476;668698;533941;533937;533939;533955;533946;533935;533944;533942;534363;534349;36967;55522;591202;591216;591206;591209;591200;591204;591192;591201;591205;453009;453011;453016;453012;452989;453007;453010;453637;333442;204806;204812;214639;214625;757468;513326;513332;521122;521082;513330;513325;98330;1925…	-	Vigilin OS=Homo sapiens GN=HDLBP PE=1 SV=2
86_1	sp|Q6DD88|ATLA3_HUMAN	73.5087	0	60503.4	ALASILLQDHIR;DIYYNNMEEVCGGEKPYLSPDILEEK;DQHSFELDEK;EHQHEEIQNVR;EQLQALIPYVLNPSK;ESGHSNWLGDPEEPLTGFSWR;GADDAMESSKPGPVQVVLVQK;GLLEYFK;IYQGEDLPHPK;KVAVVLMDTQGAFDSQSTVK;LKDIAGEFK;NVFSTFR;QLALDHFKK;SMLQATAEANNLAAAASAK;VAVVLMDTQGAFDSQSTVK	1;1;1;1;1;1;1;1;1;1;1;1;1;1;1	15	41	0.366	331710;332196;331709;331711;331708;839906;272269;272277;371456;527822;527820;527831;527825;748422;748628;748595;688487;693210;688485;688486;688761;693473;688484;71345;300024;300023;680856;680601;681343;142399;71871;182437;182445;587725;581340;581927;581331;587717;587739;587658;641876	-	Atlastin-3 OS=Homo sapiens GN=ATL3 PE=1 SV=1
1558_1	sp|Q96S66|CLCC1_HUMAN	9.84629	0.000204499	61983.1	HIGGPESEPPQALRPR;ILIEAGK;LAFAQHQAEVAK	1;1;1	3	3	0.0635	541732;18546;309733	-	Chloride channel CLIC-like protein 1 OS=Homo sapiens GN=CLCC1 PE=1 SV=1
3983_1	sp|Q9C0I1|MTMRC_HUMAN	49.8967	0	86092.8	EWVMGGHCFLDR;IGFQSLIQK;LINSSDELQDNFR;LLEMMEEVQSLQEK;LPAYFVVPTPLPEENVQR;LVCTDFK;SFLDGIYK;STDYHGLLLPHIEGPEIK;TEDLSSNFLSLQEIQTAYSK;TLFGQLK;VIGENDITLHCVDQIYGVFDEK;WIPEAQILGGGQVATLSK	1;1;1;1;1;1;1;1;1;1;1;1	12	18	0.2222	420035;148247;444223;524820;532880;665011;665007;77837;103619;649430;649438;649439;649434;720351;42782;778193;595783;595784	-	Myotubularin-related protein 12 OS=Homo sapiens GN=MTMR12 PE=1 SV=2
1059_1	sp|Q9NZ01|TECR_HUMAN	27.9071	0	36010.8	DYPPLR;HYEVEILDAK;LCFLDKVEPHATIAEIK;LLETLFVHR;SLKDEDVLQK;THPQWYPAR;VEPHATIAEIK	1;1;1;1;1;1;1	7	14	0.1981	25560;255383;638019;638014;638018;638015;199929;229947;229941;217513;217514;217506;250292;250297	-	Very-long-chain enoyl-CoA reductase OS=Homo sapiens GN=TECR PE=1 SV=1
3281_2	sp|Q15418|KS6A1_HUMAN	58.4316	0	82670.8	APQAPLHSVVQQLHGK;DILADVNHPFVVK;DKLPQSQLSHQDLQLVK;DLKPENILLDEEGHIK;DVYDDGKHVYLVTELMR;EASFVLHTIGK;EISITHHVK;ETIGVGSYSECKR;FTLSGGNWNTVSETAK;HVYLVTELMR;ICDFGFAK;LHYAFQTEGK;MLHVDPHQR;NLVFSDGYVVK;QVLQHPWVTQK;TVEYLHSQGVVHR;YGQHPNIITLK	1;1;1;0;1;1;1;1;1;1;0;0;0;1;1;1;0	12	22	0.2735	526632;526625;398780;636001;636345;635998;593209;659881;659882;659890;246215;246202;246207;246200;162671;408894;527166;527167;279461;111398;241589;203240;268023;339986;339998;430069;292732;292731	-	Ribosomal protein S6 kinase alpha-1 OS=Homo sapiens GN=RPS6KA1 PE=1 SV=2
5774_1	sp|Q9UBV2|SE1L1_HUMAN	46.0882	0	88698.5	AADMGNPVGQSGLGMAYLYGR;AASQGYTVAR;GDVQAQVGLGQLHLHGGR;LMTAYNSYK;LVANHVASDISLTGGSVVQR;LWCATTYDYK;SCHTAVELFK;TTLTSDESVKDHTTAGR	1;1;1;1;1;1;1;1	8	17	0.1448	686033;143486;143479;143492;585362;585069;585074;176774;186389;650568;650571;650570;650569;314573;240181;575839;575843	-	Protein sel-1 homolog 1 OS=Homo sapiens GN=SEL1L PE=1 SV=3
5734_1	sp|C4AMC7|WASH3_HUMAN	6.8381	0.00151143	49963.8	EEAVQQMADALQYLQK;VSGDIFSR	1;1	2	2	0.0518	593870;77119	sp|A8K0Z3|WASH1_HUMAN;sp|Q6VEQ5|WASH2_HUMAN	Putative WAS protein family homolog 3 OS=Homo sapiens GN=WASH3P PE=1 SV=2
1878_1	sp|Q75QN2|INT8_HUMAN	16.5069	0.000204499	113016	AIGQTELNASNPEEVLQLAAQR;DLVYILMAK;GNMAAFLK;LLVDQMR;QAKPGPPQLSVMNQMQQEK	1;1;1;1;1	5	5	0.0653	738700;163658;63033;74189;684560	-	Integrator complex subunit 8 OS=Homo sapiens GN=INTS8 PE=1 SV=1
1018_1	sp|Q9H1Y0|ATG5_HUMAN	22.8414	0.000204499	32426.3	EVCPSAIDPEDGEK;FDQFWAINR;IPTCFTLYQDEITER;IYQTTTERPFIQK;LFRPVAADGQLHTLGDLLK	1;1;1;1;1	5	7	0.2545	441495;243276;602223;481898;481890;663604;663608	-	Autophagy protein 5 OS=Homo sapiens GN=ATG5 PE=1 SV=2
5454_1	sp|Q02040|AK17A_HUMAN	8.42038	0.00039093	80685.9	GMVQNHQFSTLR;KPDDSHTHDELGVAHADLLQPVLDILQTVSSGCVSATTLHPLGGQPPAGAPKESPAHPEADGAPK;LIAELLSR	1;1;1	3	3	0.1223	371551;896713;92158	-	A-kinase anchor protein 17A OS=Homo sapiens GN=AKAP17A PE=1 SV=2
523_1	sp|Q9Y315|DEOC_HUMAN	73.6366	0	35208.5	AAGCNIPVASVAAGFPAGQTHLK;ASMIAMMAGSDFIK;AVTFIDLTTLSGDDTSSNIQR;DSLAWLSLVK;EELGDEWLKPELFR;ETVNATFPVAIVMLR;EWQAAWLLK;GITTAAVCVYPAR;GTELDLSWISK;IGASTLLSDIER;IQVNHPAVLR;KEWQAAWLLK;QIYHHVTGR;RAEQIQAR;TILATGELGTLTNVYK	1;1;1;1;1;1;1;1;1;1;1;1;1;1;1	15	34	0.5849	711063;711060;711342;711344;401606;715133;715128;715125;715135;715118;202696;202695;202666;202688;550911;550922;501308;510015;210525;348384;273110;287396;287391;287393;287389;211700;211699;211698;286154;188876;118383;518539;519000;519006	-	Deoxyribose-phosphate aldolase OS=Homo sapiens GN=DERA PE=1 SV=2
7469_1	sp|P28070|PSB4_HUMAN	26.8908	0.000204499	29185.5	FQIATVTEK;QPVLSQTEAR;QVLGQMVIDEELLGDGHSYSPR;TQNPMVTGTSVLGVK;VNNSTMLGASGDYADFQYLK	1;1;1;1;1	5	14	0.2879	149129;149120;149119;200369;755651;434357;434367;434978;443352;442783;434389;442778;699298;699584	-	Proteasome subunit beta type-4 OS=Homo sapiens GN=PSMB4 PE=1 SV=4
5796_1	sp|Q9UJX6|ANC2_HUMAN	18.1874	0.000204499	93768.8	DQQLVYSAGVYR;LLQSPLCAGCSSDK;QALEQFHQLSQVLHR;VSAEAVTTTLHQVTR	1;1;1;1	4	4	0.0681	360098;436253;582061;475832	-	Anaphase-promoting complex subunit 2 OS=Homo sapiens GN=ANAPC2 PE=1 SV=1
479_1	sp|P52292|IMA1_HUMAN	24.2769	0.000204499	57825.9	FVSFLGR;GINSSNVENQLQATQAAR;LLGASELPIVTPALR;NNQGTVNWSVDDIVK;TGVVPQLVK	1;1;1;1;1	5	6	0.121	50534;607662;444102;444103;516018;102976	-	Importin subunit alpha-1 OS=Homo sapiens GN=KPNA2 PE=1 SV=1
1175_2	sp|P11712|CP2C9_HUMAN	34.5033	0	55591.8	CLVEELRK;DQQFLNLMEK;EALIDLGEEFSGR;EFPNPEMFDPHHFLDEGGNFKK;FDYKDQQFLNLMEK;FSLMTLR;GFGIVFSNGK;GFGIVFSNGKK;GIFPLAER;HPEVTAK;NRSPCMQDR;NVAFMK;NYLIPK;SHMPYTDAVVHEVQR;SIEDRVQEEAR;SLTNLSK;SPCMQDR;VQEEAR;YALLLLLK;YALLLLLKHPEVTAK;YFMPFSAGK;YIDLLPTSLPHAVTCDIK	1;1;1;1;1;1;1;1;1;0;1;1;0;1;1;1;0;1;1;1;1;1	19	112	0.3653	153239;153242;153278;153229;281778;281770;281772;291533;380769;380772;380773;380763;380760;788759;788762;788758;788766;788760;582196;575835;575840;582666;575837;575844;582198;582658;582201;582209;70678;70673;78289;70672;70675;70670;70671;70681;70666;70665;78290;78291;144437;144972;144444;144440;144452;144441;144451;217151;217155;217162;217157;217149;86272;86266;86258;86274;86257;86256;86260;32759…	-	Cytochrome P450 2C9 OS=Homo sapiens GN=CYP2C9 PE=1 SV=3
5217_2	sp|Q13838|DX39B_HUMAN	39.7379	0	48959.9	AIVDCGFEHPSEVQHECIPQAILGMDVLCQAK;DFLLKPELLR;DVQEIFR;ELAFQISK;FMQDPMEIFVDDETK;GLAITFVSDENDAK;GMPQEER;GSYVSIHSSGFR;HFILDECDK;ILNDVQDR;ILVATNLFGR;LTLHGLQQYYVK;MLEQLDMR;NCPHIVVGTPGR;QVMMFSATLSK;RDVQEIFR;VAVFFGGLSIK;VNIAFNYDMPEDSDTYLHR;YMPNVK	0;0;0;0;1;0;1;0;1;0;0;0;0;1;1;0;1;1;1	8	35	0.4953	873297;270280;270278;270283;270275;270274;270270;270273;270281;270276;270291;270271;270290;270272;270279;270265;270282;270293;88298;88278;100926;100925;100931;100873;586001;585992;586350;406107;406102;406103;406091;406109;60376;299950;299944;230908;230911;118764;118733;184943;184952;184955;184946;184950;184957;184953;184942;184945;184944;184949;184951;184954;185644;184948;184956;396596;396587;396…	-	Spliceosome RNA helicase DDX39B OS=Homo sapiens GN=DDX39B PE=1 SV=1
1175_4	sp|P10632|CP2C8_HUMAN	102.676	0	55788.7	DFIDCFLIK;DQNFLTLMK;EALIDNGEEFSGR;EHQASLDVNNPR;FDYKDQNFLTLMK;FNENFR;FSLTTLR;GLGIISSNGK;GLGIISSNGKR;GNSPISQR;HPEVTAK;HRSPCMQDR;ICAGEGLAR;KSDYFMPFSAGK;NGNFKK;NLNTTAVTK;NYLIPK;RFNENFR;SDYFMPFSAGK;SFTNFSK;SHMPYTDAVVHEIQR;SPCMQDR;VKEHQASLDVNNPR;VQEEAHCLVEELR;VQEEAHCLVEELRK;VQEEIDHVIGR;YGLLLLLK;YSDLVPTGVPHAVTTDTK	1;1;1;1;1;1;0;1;1;1;0;1;1;1;1;1;0;1;1;1;1;0;1;1;1;1;1;1	24	88	0.4327	227000;227004;188381;188384;198100;381310;381326;381307;348838;348835;502111;502104;502698;50733;56328;56334;56338;56337;56319;56330;56327;56329;56335;56339;56331;56332;105557;105561;106072;106065;184263;184271;66300;66297;32759;32756;32757;237067;237066;237063;237064;105928;105930;356675;347234;347237;4190;113989;113997;113984;114385;113980;113994;113990;20667;123464;123470;273361;273366;281630;…	-	Cytochrome P450 2C8 OS=Homo sapiens GN=CYP2C8 PE=1 SV=2
2207_2	sp|Q9Y3C6|PPIL1_HUMAN	19.1194	0.000204499	18225.1	GGASIYGK;HTIFGR;IIKDFMIQGGDPTGTGR;NFAELAR;VCQGIGMVNR;VGMVETNSQDRPVDDVK	1;0;1;1;1;1	5	6	0.3916	21963;14209;570681;48625;203978;603695;603303	-	Peptidyl-prolyl cis-trans isomerase-like 1 OS=Homo sapiens GN=PPIL1 PE=1 SV=1
5217_1	sp|O00148|DX39A_HUMAN	6.11616	0.00351617	49098	AIVDCGFEHPSEVQHECIPQAILGMDVLCQAK;DFLLKPELLR;DVQEIFR;ELAFQISK;GLAITFVSDENDAK;GSYVSIHSSGFR;ILNDVQDR;ILVATNLFGR;LTLHGLQQYYVK;MLEQLDMR;RDVQEIFR;VSVFFGGLSIK	0;0;0;0;0;0;0;0;0;0;0;1	1	2	0.3115	873297;270280;270278;270283;270275;270274;270270;270273;270281;270276;270291;270271;270290;270272;270279;270265;270282;270293;88298;88278;100926;100925;100931;100873;406107;406102;406103;406091;406109;299950;299944;118764;118733;184943;184952;184955;184946;184950;184957;184953;184942;184945;184944;184949;184951;184954;185644;184948;184956;396596;396587;396603;396591;396599;396581;396585;396579;39…	-	ATP-dependent RNA helicase DDX39A OS=Homo sapiens GN=DDX39A PE=1 SV=2
4863_1	sp|Q9Y4G6|TLN2_HUMAN	183.034	0	271443	AGALQVCPTDSYTKR;ANQAIQMACQNLVDPGSSPSQVLSAATIVAK;AQHTHDAITEAAQLMK;AVAAGNSCR;AVADHIPQLVQGVR;AVGSSMAQLLTCAAQGNEHYTGVAAR;AVTESINQLITLCTQQAPGQK;DIEQASLAAVSQSLATR;DPPTWSVLAGHSHTVSDSIK;DPVQLNLLYVQAR;DVDVALK;ERELEEAR;EVANSTANLVK;FFYSDQNVDSR;FFYSDQNVDSRDPVQLNLLYVQAR;FQDVLMSLAK;GAAANPENEDQQQR;GAASKPVDDPSMYQLK;GITMATAK;GIWLEAGR;GTFVDYQTTVVK;GVAASTTDPAAAHAMLDSAR;HFVQSAK;HTSALCNACR;ILDHQQQMTVLDQTK;KAVSDMLTACK…	1;1;1;0;1;1;1;1;1;0;1;0;0;0;0;1;1;1;0;1;1;1;1;1;1;1;0;1;1;1;0;1;1;1;1;1;1;0;1;1;0;0;1;1;0;1;1;1;1;1;0;1	38	54	0.275	504090;845828;552774;552771;87410;418321;418309;418310;792696;792945;793058;794900;795007;726675;550550;550546;683215;432278;432283;432288;432284;24969;147226;211058;211062;347164;820524;820521;215444;431386;524861;37058;37060;85474;336247;336805;612910;46445;238831;567020;567583;567599;258669;419623;419622;643364;704070;704360;219628;73278;73276;72571;72703;72589;72608;622987;622988;769837;55842…	-	Talin-2 OS=Homo sapiens GN=TLN2 PE=1 SV=4
7940_1	sp|P0C024|NUDT7_HUMAN	15.0494	0.000204499	26925.1	DPTDMDDAATALR;RAPGEVCFPGGK;YSHLPYNK;YSVLLPLVAK	1;1;1;1	4	5	0.1807	355384;287180;142604;184336;184321	-	Peroxisomal coenzyme A diphosphatase NUDT7 OS=Homo sapiens GN=NUDT7 PE=2 SV=1
7353_1	sp|Q9C037|TRIM4_HUMAN	8.09433	0.00039093	57424.2	LVFSQEGR;SEIQDVNYSLEAVK	1;1	2	2	0.044	100821;467490	-	E3 ubiquitin-protein ligase TRIM4 OS=Homo sapiens GN=TRIM4 PE=1 SV=2
790_1	sp|Q93009|UBP7_HUMAN	57.0225	0	128220	DLLQFFKPR;EEAIEHNYGGHDDDLSVR;FAIVMMGR;FDKDHDVMLFLK;HQYINEDEYEVNLK;IIGVHQEDELLECLSPATSR;IQSLLDIQEKEFEK;ITDFENRR;LSESVLSPPCFVR;LSEVLQAVTDHDIPQQLVER;MNYFQVAK;TIPNDPGFVVTLSNR;VFYELQHSDKPVGTK	1;1;1;1;1;1;1;1;1;1;1;1;1	13	22	0.1579	223214;223217;223213;660671;95741;420789;565341;718473;718671;531762;531759;155326;411575;411572;411580;724242;724243;724762;132432;484701;485338;544862	-	Ubiquitin carboxyl-terminal hydrolase 7 OS=Homo sapiens GN=USP7 PE=1 SV=2
2141_2	sp|Q8ND30|LIPB2_HUMAN	49.7864	0	98482.3	AALLSQIPGPTAAYIK;FNPHCLHR;GSGVHGGLIILEPR;IRDLEVCLEGHQVK;LALEMLELPQER;LDLMTEVSELK;LNAAEEMLQQELLSR;RPADESNLSPSEVVQWSNHR;SALLDHIWVTR;SVDLAEYAPNLR;VTSQLHHLSIK	1;1;1;1;1;1;1;1;1;0;1	10	11	0.1644	476485;170395;363493;519422;384456;289450;543462;728166;308899;308889;330245;280446	-	Liprin-beta-2 OS=Homo sapiens GN=PPFIBP2 PE=1 SV=3
1865_1	sp|Q13268|DHRS2_HUMAN	46.9565	0	29907.7	DGAHVVISSR;ILSVNVK;LQGEGLSVAGIVCHVGK;NFKEHHQLQR;TALLGLTR;TLALELAPK;VAVVTGSTSGIGFAIAR;VFHGNESLWK;VNCVVPGIIK	1;1;1;1;1;1;1;1;1	9	49	0.35	150378;150382;150371;150375;30034;29997;533439;533440;533437;533434;533431;533432;324238;324716;324233;324234;59654;59571;59633;59573;59570;59679;59595;110704;110697;110707;110694;472485;472478;472475;472484;472468;472483;472474;255320;255319;255331;255321;255793;255296;255326;255794;255322;181878;181871;181876;181879;181870;181882	-	Dehydrogenase/reductase SDR family member 2, mitochondrial OS=Homo sapiens GN=DHRS2 PE=1 SV=4
1718_1	sp|O00562|PITM1_HUMAN	9.6952	0.000204499	134763	ASDTVVCEGRPQVLSGR;ILDTIDIVR;TNQAYSAFLR	1;1;1	3	3	0.0289	580425;159547;227003	-	Membrane-associated phosphatidylinositol transfer protein 1 OS=Homo sapiens GN=PITPNM1 PE=1 SV=4
3367_2	sp|Q01518|CAP1_HUMAN	106.856	0	51868.7	ALLVTASQCQQPAENK;AQSGPVR;CVNTTLQIK;EFHTTGLAWSK;EIGGDVQK;EMNDAAMFYTNR;EPAVLELEGK;EPAVLELEGKK;GYADSPSK;HAEMVHTGLK;HAEMVHTGLKLER;HVDWVK;HVSDDMK;INSITVDNCK;INSITVDNCKK;KEPAVLELEGK;LEAVSHTSDMHR;LSDLLAPISEQIK;NSLDCEIVSAK;QVAYIYK;SSEMNVLIPTEGGDFNEFPVPEQFK;TDGCHAYLSK;TLWNGQK;VENQENVSNLVIEDTELK;VPTISINK	1;1;1;1;1;1;1;1;1;1;1;0;1;1;1;1;1;1;1;1;1;1;1;1;0	23	132	0.4863	549359;549360;549352;549362;550001;549999;550007;550000;549353;549341;549357;550006;549358;549355;550478;6921;168241;168131;288782;288771;288796;288780;59845;59844;405234;405233;405237;396124;413932;405235;396126;396700;172670;253177;49957;196253;196252;196248;207149;207144;196249;196246;207157;207134;207148;428344;33271;33258;33262;33263;53222;222574;222573;222570;222556;297256;297248;297259;297…	-	Adenylyl cyclase-associated protein 1 OS=Homo sapiens GN=CAP1 PE=1 SV=5
6857_1	sp|Q14156|EFR3A_HUMAN	25.4417	0.000204499	92864.9	DLYFLTNK;IAESLGGSGYSVER;IGSYLAER;LSVPYVPQVTDEDR;TMEAPYFLPEHIFR;VPVFGTSTHTLDISQLGDLGTR	1;1;1;1;1;1	6	7	0.0974	138805;375159;375150;89302;478183;546194;729620	-	Protein EFR3 homolog A OS=Homo sapiens GN=EFR3A PE=1 SV=2
1965_1	sp|O75352|MPU1_HUMAN	8.61517	0.00039093	26620.5	GLGLGIVAGSLLVK;LLVPILLPEK	1;1	2	3	0.0972	300337;205213;205214	-	Mannose-P-dolichol utilization defect 1 protein OS=Homo sapiens GN=MPDU1 PE=1 SV=2
4404_1	sp|Q92734|TFG_HUMAN	52.1051	0	43421.2	IPIHNEDITYDELVLMMQR;LLDSLEPPGEPGPSTNIPENDTVDGR;LLDSLEPPGEPGPSTNIPENDTVDGREEK;LLSNDEVTIK;LTLFVNGQPRPLESSQVK;NQDEINKNVMSAFGLTDDQVSGPPSAPAEDR;NVMSAFGLTDDQVSGPPSAPAEDR;QSTQVMAASMSAFDPLK;QSTQVMAASMSAFDPLKNQDEINK	1;1;1;1;1;1;1;1;1	9	40	0.31	733373;737086;733595;733370;733374;799692;799595;839868;202587;202605;202633;647686;647695;647249;648103;647673;647676;647242;647253;647668;647666;856046;758705;758713;758837;758716;758827;761806;762010;758708;758710;572973;572950;572967;573341;573749;793601;793414;793420;793421	-	Protein TFG OS=Homo sapiens GN=TFG PE=1 SV=2
6972_1	sp|Q96P48|ARAP1_HUMAN	52.5298	0	162089	AGLSLQR;AQEGWFSLSGSELR;AVFPEGPCEEPLQLR;EEITAIVK;EGEQHVDDVSSALK;FEVITNNR;FISVACISHVAAIGDQK;ILAGLLR;IWAAAPNR;LGSVSLIPLR;RYHPLFGNQEELDK;SLLGLGLPSGGFHDR;VAGTASGTQHAGDFICTVYLEEK;VLPILHGLGTDSHLVVK	1;1;1;1;1;1;1;1;1;1;1;1;1;1	14	16	0.1221	18843;451724;451728;542060;86296;423907;128545;574851;22946;83751;157990;543770;430599;430603;757625;567307	-	Arf-GAP with Rho-GAP domain, ANK repeat and PH domain-containing protein 1 OS=Homo sapiens GN=ARAP1 PE=1 SV=3
8407_1	sp|P49411|EFTU_HUMAN	114.768	0	49510.2	AEAGDNLGALVR;DKPHVNVGTIGHVDHGK;DLEKPFLLPVEAVYSVPGR;DPELGLK;EHLLLAR;ELAMPGEDLK;ELLTEFGYK;FNLILR;GEETPVIVGSALCALEGR;GITINAAHVEYSTAAR;GTVVTGTLER;HYAHTDCPGHADYVK;IILPPEK;IILPPEKELAMPGEDLK;ILAEGGGAK;KGDECELLGHSK;LLDAVDTYIPVPAR;NMITGTAPLDGCILVVAANDGPMPQTR;QIGVEHVVVYVNK;TIGTGLVTNTLAMTEEEK;TTLTAAITK;TVVTGIEMFHK;VEAQVYILSK;YEEIDNAPEER	1;1;1;1;1;1;1;1;1;1;1;1;1;1;1;1;1;1;1;1;1;1;1;1	24	85	0.635	236753;572334;572341;572330;572339;572343;572332;572346;572342;572340;572294;682235;682238;682247;682222;682229;682228;29360;63195;63189;183925;182248;31094;31108;31102;31104;31107;591145;508295;508792;508297;508284;508787;147881;147878;147877;555032;555035;43800;43796;43808;43803;43809;43804;605120;605119;605126;46010;344675;440362;440368;440370;440367;440378;440359;811962;811955;812077;408181;4…	-	Elongation factor Tu, mitochondrial OS=Homo sapiens GN=TUFM PE=1 SV=2
3727_1	sp|Q9NQH7|XPP3_HUMAN	59.5268	0	56996.8	AILFVPR;APVEEAFLYAK;DGEMVLLDGGCESSCYVSDITR;ELWDGPR;GADILAYPPVVAGGNR;GVQQLIQR;IEDDVVVTQDSPLILSADCPK;KYCPHHVGHYLGMDVHDTPDMPR;LKDLGIMK;LMSLIQK;LTSQAFIETMFTSK;NIKENNAFK;QLPSHK;SLPLQPGMVITIEPGIYIPEDDKDAPEK;SNTLHYVK	1;1;1;1;1;1;1;1;1;1;1;1;1;1;1	15	41	0.3846	46218;46219;46217;46232;46222;46230;46231;46227;46220;46203;46204;266173;266192;266197;758983;73162;453512;453502;453490;453522;453517;453473;103358;103362;103354;729571;729565;729561;729847;805432;93650;100087;54199;471450;471441;471472;168707;5107;836849;113919;113922	-	Probable Xaa-Pro aminopeptidase 3 OS=Homo sapiens GN=XPNPEP3 PE=1 SV=1
7392_1	sp|P21796|VDAC1_HUMAN	84.7388	0	30753.6	EHINLGCDMDFDIAGPSIR;GYGFGLIK;KLETAVNLAWTAGNSNTR;LETAVNLAWTAGNSNTR;LGLGLEFQA;LTFDSSFSPNTGK;LTFDSSFSPNTGKK;REHINLGCDMDFDIAGPSIR;SENGLEFTSSGSANTETTK;TDEFQLHTNVNDGTEFGGSIYQK;TKSENGLEFTSSGSANTETTK;VNNSSLIGLGYTQTLKPGIK;VTGSLETK;VTQSNFAVGYK;WTEYGLTFTEK;YQIDPDACFSAK	1;1;1;1;1;1;1;1;1;1;1;1;1;1;1;1	16	78	0.6184	689778;689971;694344;689985;694345;689757;689984;689979;694642;64488;64486;64494;64491;625420;624949;625447;624948;624966;624965;624943;624947;625793;575608;106425;360542;360541;360531;360537;432089;432095;432080;432079;432072;432098;432073;730034;629820;629814;629815;629817;629812;784227;784219;784214;784212;784229;784555;784218;784226;784565;784216;698202;698422;698199;698198;698204;698417;6986…	-	Voltage-dependent anion-selective channel protein 1 OS=Homo sapiens GN=VDAC1 PE=1 SV=2
482_1	sp|Q13616|CUL1_HUMAN	77.8171	0	89622	AGIQQVYTR;DCLFRPLNK;ESTEFLQQNPVTEYMK;FINNNAVTK;FYTQQWEDYR;GELVTNCFK;GQTPGGAQFVGLELYK;GQTPGGAQFVGLELYKR;KGQTPGGAQFVGLELYK;LLETHIHNQGLAAIEK;LLIQAAIVR;LLVLEDENANVDEVELKPDTLIK;MYNLVSR;MYVQTVLDVHKK;NYLTNLLK;VQVYLHESTQDELAR	1;1;1;1;1;1;1;1;1;1;1;1;1;1;1;1	16	24	0.2191	148825;222145;623932;623935;142322;142323;380598;164343;503315;576883;565594;562319;562856;130978;785722;785719;77866;77871;83681;83680;395439;121879;563083;563091	-	Cullin-1 OS=Homo sapiens GN=CUL1 PE=1 SV=2
4294_1	sp|Q02413|DSG1_HUMAN	56.7979	0	113676	ALNSMGQDLERPLELR;ASAISVTVLNVIEGPVFRPGSK;EQYGQYALAVR;IHSDCAANQQVTYR;ISGVGIDQPPYGIFVINQK;KLADISLGK;QEPSDSPMFIINR;SSSDHHFNQTIGSASPSTAR;TYVVTGNMGSNDKVGDFVATDLDTGRPSTTVR;VGDFVATDLDTGRPSTTVR;YQGTILSIDDNLQR;YVMGNNPADLLAVDSR	1;1;1;1;1;1;1;1;1;1;1;1	12	19	0.1773	585037;591179;712171;300614;502018;657554;657547;657543;657529;105143;435234;670314;861369;645411;487697;487748;546154;539042;539414	-	Desmoglein-1 OS=Homo sapiens GN=DSG1 PE=1 SV=2
6310_1	sp|Q8IYB8|SUV3_HUMAN	64.7432	0	87935.4	ATEPPSPDAGELSLASR;ELDGIIQDGVHNITK;ELEPITTSQALQIAGR;FMDMFPDASLIR;FSAELIQHIPLSLR;IIFYSLIKPSINEK;LFHQAFISFR;LLAHEIFEK;LLNLEGFPSGSQSR;LVQQGLLTPDMLK;NEPLTFAWLR;QPFVCSSLLQFAR;SGVYCGPLK;SNAAGVPCDLVTGEER;VTVQPNGK	1;1;1;1;1;1;1;1;1;1;1;1;1;1;1	15	22	0.2417	520229;496306;534988;534987;384744;481527;481524;503410;281971;182406;182416;419374;419381;419375;392593;271883;271887;445558;122695;508584;508589;58223	-	ATP-dependent RNA helicase SUPV3L1, mitochondrial OS=Homo sapiens GN=SUPV3L1 PE=1 SV=1
3072_1	sp|P04066|FUCO_HUMAN	24.4866	0.000204499	53654.7	DLVGELGTALR;DNYPPGFSYADFGPQFTAR;FKPQSLPDHKWEMCTSIDK;ITMLGIQGDLK;YVVLTTK	1;1;1;1;1	5	16	0.1438	209970;209960;209955;209964;209963;209949;687172;687429;687434;687176;687173;737294;238667;238674;248219;49842	-	Tissue alpha-L-fucosidase OS=Homo sapiens GN=FUCA1 PE=1 SV=4
1485_1	sp|Q9H9S4|CB39L_HUMAN	27.0387	0.000204499	39062.8	DVTQIFNNILR;GYEAPQIALR;LIEFLSSFQK;LLGELILDR;LLQSENYVTK;LMMNLLR;VFVASPHK;YISKPENLK	1;1;1;1;1;0;1;0	6	13	0.2196	322229;193016;252553;150905;150912;150921;150906;150915;150908;150914;150920;242385;88473;80627;80625;78707;177718	-	Calcium-binding protein 39-like OS=Homo sapiens GN=CAB39L PE=1 SV=3
3760_1	sp|Q8IYQ7|THNS1_HUMAN	107.964	0	83017.1	AQILLER;CIHPADIPAAR;DGQLMTELFNR;FAPAIMQALK;FICASNQNHVLTDFIK;IAVVAFFPENGVSDFQK;IVGQNSGTSMK;KLAQTFSPSIDILK;LAQTFSPSIDILK;LESQHHFQIEK;LGCCVIDVDDDILEK;LGEMIETAYGENFACSK;LQDVGNEQFLEEEGK;MEYQVCAADMNVLK;MMGIPIR;NIILMGPPGAGK;SHVEQLVQNQFI;SLVGATYVER;TCPVIISSTAHYSK;TWNMSVSEK;VFCESGASPEEVADK;YQDVDSETFISTR	1;1;1;1;1;1;1;1;1;1;1;1;1;1;1;1;1;1;1;1;1;1	22	69	0.3513	58478;58518;257443;257448;257455;316632;316626;176507;176503;186110;186112;176504;186107;610697;610214;595322;595324;595330;595326;595311;595667;595670;595686;595668;595671;595664;195623;449348;449347;379431;379996;358064;358095;358052;552117;615564;615566;538992;539004;539000;539001;539005;539032;539014;538988;539433;507012;515160;507005;47144;225473;225474;225470;225478;384309;384313;384302;384…	-	Threonine synthase-like 1 OS=Homo sapiens GN=THNSL1 PE=1 SV=2
1485_2	sp|Q9Y376|CAB39_HUMAN	47.1288	0	39843.7	DVAQIFNNILR;FQNDRTEDEQFNDEK;GYESPEIALNCGIMLR;HNFTIMTK;LIEFLSK;LLHSENYVTK;LLHSENYVTKR;LLSAEFLEQHYDR;LMMNLLR;NIQFEAFHVFK;TEDEQFNDEK;TQPILDILLK;VFVANPNK;YISKPENLK	1;1;1;1;1;1;1;1;0;1;1;1;1;0	12	22	0.3695	304015;613828;613492;613491;577899;135948;127935;127956;62076;247632;247647;337492;479779;480242;88473;80627;80625;349075;349086;349035;276126;216810;216806;216809;80083;177718	-	Calcium-binding protein 39 OS=Homo sapiens GN=CAB39 PE=1 SV=1
6938_1	sp|P78318|IGBP1_HUMAN	23.8974	0.000204499	39197.5	AAEMLSQLDLFSR;EYYLLHLQR;LPELFETGR;WIDISLEEIESIDQEIK;YGALPDQGIAK;YLLVPAFQGALTMK	1;1;1;1;1;1	6	9	0.2153	406723;406758;414731;264292;264290;161570;662223;203388;444827	-	Immunoglobulin-binding protein 1 OS=Homo sapiens GN=IGBP1 PE=1 SV=1
1198_1	sp|Q03426|KIME_HUMAN	50.4463	0	42424.3	LKEVAGLPDDCAVTER;LQPHSNGKVDLSLPNIGIK;LQSLDTSFLEQGDVTTPTSEQVEK;LTGAGGGGCGITLLKPGLEQPEVEATK;MIHGNPSGVDNAVSTWGGALR;MLSEVLLVSAPGK;SPALQILLTNTK;VDLSLPNIGIK;VILHGEHAVVHGK	1;1;1;1;1;1;1;1;1	9	34	0.3662	556050;556029;653134;791414;791686;791567;791562;791417;791431;791595;791593;791597;791715;688437;684344;684341;688707;684342;684339;688710;328160;328171;328168;337524;337522;301632;301634;301635;301629;226139;226133;358250;358254;358248	-	Mevalonate kinase OS=Homo sapiens GN=MVK PE=1 SV=1
6087_1	sp|Q9UJC5|SH3L2_HUMAN	17.8896	0.000204499	12318.2	ESNTVFSFLGLKPR;KPTQGNPLPPQIFNGDR;NVPPEKKPTQGNPLPPQIFNGDR;YCGDYDSFFESK	1;1;1;1	4	7	0.4579	467155;467173;467178;467167;599810;774280;426565	-	SH3 domain-binding glutamic acid-rich-like protein 2 OS=Homo sapiens GN=SH3BGRL2 PE=1 SV=2
8417_1	sp|Q9H993|ARMT1_HUMAN	46.5721	0	51139.9	AISLLSK;DRIPQILTK;HGEEGVEAEKK;HKSEFFEK;IPQILTK;LLQISLWGNK;LRNELQTDKPFIPLVEK;NELQTDKPFIPLVEK;TIEDLDENQLKDEFFK;VIDTLHR;YGIFQYDGPL	1;1;1;1;1;1;1;1;1;1;1	11	29	0.2154	15010;172289;172288;252963;155905;44982;228475;655776;655778;655779;655777;655775;655774;655773;655780;555370;555821;555820;555358;555367;637847;637837;637834;637845;637848;637850;63926;63931;228673	-	Protein-glutamate O-methyltransferase OS=Homo sapiens GN=ARMT1 PE=1 SV=1
1862_1	sp|O00116|ADAS_HUMAN	51.62	0	72865.7	AHGHCLHEIFLLR;EEILANGGSLSHHHGVGK;EGMFER;ESGYCTGHEPDSLEFSTVGGWVSTR;ESISDVGFGMLK;EWIQNTLGVNVEHK;GVQFAPFSTCR;IPDIVLWPTCHDDVVK;KGQIELTGK;TIISLDTSQMNR;YGSVAFPNFEQGVACLR	1;1;1;1;1;1;1;1;1;1;1	11	17	0.2325	471151;471157;584987;28099;804963;291984;504165;504168;504155;284242;610272;610271;119491;348350;613568;613569;613567	-	Alkyldihydroxyacetonephosphate synthase, peroxisomal OS=Homo sapiens GN=AGPS PE=1 SV=1
2905_1	sp|Q92997|DVL3_HUMAN	8.65014	0.00039093	78005.9	IEPGDMLLQVNEINFENMSNDDAVRVLR;YNFLGISIVGQSNER	1;1	2	2	0.0601	852404;519883	-	Segment polarity protein dishevelled homolog DVL-3 OS=Homo sapiens GN=DVL3 PE=1 SV=2
439_1	sp|O43251|RFOX2_HUMAN	8.29529	0.00039093	41348.4	KIEVNNATAR;YAQPATATAATAAAAAAAAYSDGYGR	1;1	2	2	0.0923	191711;754029	-	RNA binding protein fox-1 homolog 2 OS=Homo sapiens GN=RBFOX2 PE=1 SV=3
2363_1	sp|Q8TC07|TBC15_HUMAN	42.0854	0	79439.7	DPYTATMIGFSK;HYGFNEILK;IDLGERPVVQR;ILNVDNMK;KDSSSVVEWTQAPK;LLIESLEK;TLLVNCQNK;TNDQDGLISGILR;VTNYIFDSLR;YVVLCESPQDKR	1;1;1;1;1;1;1;1;1;1	10	16	0.1534	321026;194724;194728;291820;106020;450043;449660;105120;176327;361301;260405;260410;413148;413133;413094;413149	-	TBC1 domain family member 15 OS=Homo sapiens GN=TBC1D15 PE=1 SV=2
5868_1	sp|Q86VR2|F134C_HUMAN	6.11616	0.00351617	51363.7	ALVEVLGPYEPLLSR	1	1	1	0.0322	498687	-	Protein FAM134C OS=Homo sapiens GN=FAM134C PE=1 SV=1
1962_1	sp|Q9H9L3|I20L2_HUMAN	6.84446	0.00151143	39129.6	DTSHIPPLNR;IVVGHAIHNDFK	1;1	2	2	0.0623	213448;331583	-	Interferon-stimulated 20 kDa exonuclease-like 2 OS=Homo sapiens GN=ISG20L2 PE=1 SV=1
1610_2	sp|Q9UBI6|GBG12_HUMAN	23.0668	0.000204499	8001.17	ASADLMSYCEEHAR;LEASIER;SDPLLIGIPTSENPFK;SDPLLIGIPTSENPFKDK;TASTNNIAQAR;TVQQLR	1;1;1;1;1;0	5	16	0.7778	489592;489596;47156;535492;535507;535513;535496;535489;536094;634080;211452;212024;212033;212015;211419;212013;18839	-	Guanine nucleotide-binding protein G(I)/G(S)/G(O) subunit gamma-12 OS=Homo sapiens GN=GNG12 PE=1 SV=3
4563_1	sp|Q5T6F2|UBAP2_HUMAN	7.3016	0.000765111	117044	IPYQSPVSSSESAPGTIMNGHGGGR;LPVDYYGIPFAAPTALASR	1;1	2	2	0.0393	763528;650278	-	Ubiquitin-associated protein 2 OS=Homo sapiens GN=UBAP2 PE=1 SV=1
7217_1	sp|Q86V97|KBTB6_HUMAN	6.11616	0.00351617	76088.8	EMVIFFGHPR;SQAQSYIAQNFK	0;1	1	1	0.0326	262984;351894	-	Kelch repeat and BTB domain-containing protein 6 OS=Homo sapiens GN=KBTBD6 PE=1 SV=1
6547_1	sp|Q9BRR9|RHG09_HUMAN	8.83742	0.00039093	83207.9	RPPLQSLQER;VSGNLAVVQK	1;1	2	2	0.0267	258834;139454	-	Rho GTPase-activating protein 9 OS=Homo sapiens GN=ARHGAP9 PE=1 SV=2
6492_1	sp|Q9BRQ6|MIC25_HUMAN	22.8494	0.000204499	26441.4	ASLPTGEGSISHEEQK;DRPHEVLLCSDLVK;LSSEQFHEAASK;MKEPSSPPPAPTSSTFGLQDGNLR	1;1;1;1	4	5	0.2809	505593;511982;511986;322477;768658	-	MICOS complex subunit MIC25 OS=Homo sapiens GN=CHCHD6 PE=1 SV=1
8309_1	sp|Q9Y450|HBS1L_HUMAN	45.3266	0	75425.6	ESDVGFIPTSGLSGENLITR;GFPVLLHYQTVSEPAVIK;GLCLLEQIDSFKPPQR;GQNALVELQTQRPIALELYK;INVGCIFCGPK;LCVSDVFK;LGHFLK;LYSCLDHMR;SLGVTQLAVAVNK;YGGSTIAAGVVTEIKE	1;1;1;1;1;1;1;1;1;1	10	13	0.2003	671758;671731;642605;607793;722820;722814;281776;116746;6977;242108;302246;302252;467104	-	HBS1-like protein OS=Homo sapiens GN=HBS1L PE=1 SV=1
3481_2	sp|O15066|KIF3B_HUMAN	11.6611	0.000204499	85072.8	GVIPNSFDHIFTHISR;QELEQTQNELTRELK;SQNQQYLVR;SVGATNMNEHSSR	1;1;1;1	4	5	0.071	584374;591883;205455;205458;354875	-	Kinesin-like protein KIF3B OS=Homo sapiens GN=KIF3B PE=1 SV=1
7291_1	sp|P62304|RUXE_HUMAN	18.6227	0.000204499	10796.6	GDNITLLQSVSN;IMLKGDNITLLQSVSN;IQVWLYEQVNMR;VMVQPINLIFR	1;1;1;1	4	20	0.4239	279319;279315;279763;551434;467055;458216;467062;467052;467031;320904;320905;329387;320910;320917;329391;320903;329398;329400;329388;329408	-	Small nuclear ribonucleoprotein E OS=Homo sapiens GN=SNRPE PE=1 SV=1
4525_1	sp|O75023|LIRB5_HUMAN	8.7951	0.00039093	64085.8	EGAAHPPLCLK;EGLPWAR;FHIPSTVYDSAGR	1;1;1	3	3	0.0525	241055;51629;389020	-	Leukocyte immunoglobulin-like receptor subfamily B member 5 OS=Homo sapiens GN=LILRB5 PE=1 SV=1
581_1	sp|Q9GZS3|WDR61_HUMAN	40.3967	0	33559.8	ENSETVVTGSLDDLVK;EYSLDTR;FILSIAYSPDGK;IVSVGDDQEIHIYDCPI;LLHTLEGHAMPIR;QEQAHDDAIWSVAWGTNKK;SLTFSPDSQLLVTASDDGYIK;TNQYGILFK;VNIFGVESGKK	1;1;1;1;1;1;1;1;1	9	13	0.4098	524468;78165;308683;634472;410074;410064;418919;696648;716035;716023;172139;231875;231867	-	WD repeat-containing protein 61 OS=Homo sapiens GN=WDR61 PE=1 SV=1
8485_1	sp|O95249|GOSR1_HUMAN	33.7081	0	28594.6	ANFMAIR;DILQDYTHEFHK;FPAVNSLIQR;HRDILQDYTHEFHK;LIEETISIAMATK;MAEYTNSAGVPSLNAALMHTLQR;MNTLANR;TELFLK	1;1;1;1;1;1;1;1	8	18	0.32	49389;56529;441585;441588;441984;441577;210619;584022;372461;761412;764232;764236;764229;48144;48129;48113;21416;21417	-	Golgi SNAP receptor complex member 1 OS=Homo sapiens GN=GOSR1 PE=1 SV=1
4195_1	sp|Q14CX7|NAA25_HUMAN	66.3559	0	112221	ALQQHLCVVQLTR;DIQYPFLGPVPTR;FIEKDIQYPFLGPVPTR;GLETHLIALK;HIQHDTIGYLLTR;KVPNSEEYHSHLFMAYAR;LISGLPSLNHPVEPK;LLGLYHTMDK;LNNSLHFAQVR;LRPIYDYLDNGNNK;LSLEEETLWLR;MQQAGMALYK;SLLDQLK;TMFLPLAER;VFVDLLPATQCTK	1;1;1;1;1;1;1;1;1;1;1;1;1;1;1	15	23	0.1759	451459;418239;649948;179649;179642;451912;695113;470391;470393;470394;239748;301357;301366;519349;354122;208156;208169;46811;168722;178615;412212;412204;412211	-	N-alpha-acetyltransferase 25, NatB auxiliary subunit OS=Homo sapiens GN=NAA25 PE=1 SV=1
5175_1	sp|P20674|COX5A_HUMAN	29.8045	0	16751.7	GINTLVTYDMVPEPK;ILEVVKDK;KGINTLVTYDMVPEPK;LNDFASTVR;RLNDFASTVR;WVTYFNKPDIDAWELRK	1;1;1;1;1;1	6	39	0.3333	509927;509918;509926;509924;509929;509928;517821;517823;517816;517822;517836;509911;517828;509933;509932;517812;518252;104480;104479;104481;104482;570307;570306;570739;143091;143065;143081;143079;143108;143078;143113;143088;143073;232483;232478;232481;232490;232477;695858	-	Cytochrome c oxidase subunit 5A, mitochondrial OS=Homo sapiens GN=COX5A PE=1 SV=2
7039_1	sp|Q96CW5|GCP3_HUMAN	9.21991	0.000204499	103506	LSELGWLHNK;VIGSNFAPTVERDEFLVAEK;YLLDVLNKK	1;1;1	3	3	0.043	243443;706805;186211	-	Gamma-tubulin complex component 3 OS=Homo sapiens GN=TUBGCP3 PE=1 SV=2
2142_1	sp|P09497|CLCB_HUMAN	10.1219	0.000204499	25175.1	LTQEPESIR;LTQEPESIRK;SVLMSLK;VAQLCDFNPK	1;1;1;1	4	4	0.1179	166289;245717;31665;240179	-	Clathrin light chain B OS=Homo sapiens GN=CLTB PE=1 SV=1
8200_1	sp|Q9NZM4|GSCR1_HUMAN	6.11616	0.00351617	158393	TAFPSFEDALHR	1	1	1	0.0077	354967	-	Glioma tumor suppressor candidate region gene 1 protein OS=Homo sapiens GN=GLTSCR1 PE=1 SV=2
4785_1	sp|Q8IZ07|AN13A_HUMAN	14.3928	0.000204499	67576.8	AIQESLLTSTEGLCPSALSETSR;DYHNTSMALEGVPELLQK;VYTVNNVNVITK	1;1;1	3	3	0.0898	757029;657408;340034	-	Ankyrin repeat domain-containing protein 13A OS=Homo sapiens GN=ANKRD13A PE=1 SV=3
5318_1	sp|Q9BVJ6|UT14A_HUMAN	12.2972	0.000204499	87924.1	NLPNVIINEK;TIQTPIGSTWNTQR;TSSSLATVK	1;1;1	3	4	0.0428	216713;471520;471140;81669	-	U3 small nucleolar RNA-associated protein 14 homolog A OS=Homo sapiens GN=UTP14A PE=1 SV=1
3642_1	sp|Q14213|IL27B_HUMAN	6.11616	0.00351617	25380	VGPIEATSFILR	1	1	1	0.0524	304087	-	Interleukin-27 subunit beta OS=Homo sapiens GN=EBI3 PE=1 SV=2
7788_1	sp|Q8IUR7|ARMC8_HUMAN	18.8498	0.000204499	75460.2	ANLIVLGAVPR;DKPIEMQLTSAK;DMGIVDILHK;LLYLLQQETSSTELK;TLPCLVR	1;1;1;1;1	5	7	0.0817	197053;338174;208318;208315;208311;553345;66455	-	Armadillo repeat-containing protein 8 OS=Homo sapiens GN=ARMC8 PE=1 SV=2
886_1	sp|Q00G26|PLIN5_HUMAN	45.0851	0	50759.7	ATCTAVCDVYSAAK;DRHPLLGSACR;DVVASSVTGVVDLAR;LAENCVCGLTTR;LPFLQQPSETVVTSAK;SSVWEQDQQNVVQR;SVDALQTAFADAR;SVSHAVDVVLEK;VVALPLVR	1;1;1;1;1;1;1;1;1	9	12	0.2484	425946;425949;291619;410054;356698;356638;543559;543552;522919;340318;292211;70466	-	Perilipin-5 OS=Homo sapiens GN=PLIN5 PE=1 SV=2
4354_1	sp|Q9NY33|DPP3_HUMAN	8.36235	0.00039093	82537.8	SVGKPALER;VILGSEAAQQHPEEVR	1;1	2	2	0.0339	111169;551800	-	Dipeptidyl peptidase 3 OS=Homo sapiens GN=DPP3 PE=1 SV=2
1365_1	sp|Q8NC51|PAIRB_HUMAN	77.0743	0	44938.5	AKVEFNIR;EETQPPVALKK;EMTLDEWK;FDQLFDDESDPFEVLK;FEKPLEEK;GGSGSHNWGTVK;GGSGSHNWGTVKDELTESPK;KNPLPPSVGVVDK;KPNEGADGQWKK;PGHLQEGFGCVVTNR;RFEKPLEEK;RPDQQLQGEGK;SAAQAAAQTNSNAAGK;SEEAHAEDSVMDHHFR;SKSEEAHAEDSVMDHHFR;SSASAPDVDDPEAFPALA;SSFSHYSGLK;SSFSHYSGLKHEDK	1;1;1;1;1;1;1;1;1;1;1;1;1;1;1;1;1;1	18	36	0.4632	121016;267472;267482;155784;624279;141861;237124;237115;669942;331707;331703;336181;336184;506556;506551;230582;230586;230600;230590;230597;276782;276809;276800;276815;276811;276803;277272;277639;395172;606202;606201;677032;550329;189888;189890;480197	-	Plasminogen activator inhibitor 1 RNA-binding protein OS=Homo sapiens GN=SERBP1 PE=1 SV=2
8175_1	sp|Q6P1Q0|LTMD1_HUMAN	25.7162	0.000204499	41763.4	ECFSNHPLGMNQLQALHVK;LGIGQLTAQEVK;LTDLCTK;NLMSYVVTK;QSHPEIISYLEK;VIPLISDAGLR	1;1;1;1;1;1	6	6	0.1944	707198;277485;62271;157730;385444;216779	-	LETM1 domain-containing protein 1 OS=Homo sapiens GN=LETMD1 PE=1 SV=1
5787_1	sp|O60513|B4GT4_HUMAN	5.85232	0.00384481	40015.7	ISRPLPEVGK;LLHQVSR	1;1	2	2	0.0494	180351;63595	-	Beta-1,4-galactosyltransferase 4 OS=Homo sapiens GN=B4GALT4 PE=1 SV=1
4873_1	sp|Q9NPH3|IL1AP_HUMAN	6.82193	0.00151143	65376.7	TQILSIK;VAFPLEVVQK	1;1	2	2	0.0298	41208;201451	-	Interleukin-1 receptor accessory protein OS=Homo sapiens GN=IL1RAP PE=1 SV=2
3683_1	sp|Q9NZJ7|MTCH1_HUMAN	38.612	0	41517.3	CMVQFVGR;ETSYEMMMQCVSR;LLIQVGHEPMPPTLGTNVLGR;LMSNALSTVTR;MLAHPLHVISMR;VFPPDEIEQVSNKDDMK;YIVQVDGK;YSGVLSSIGK	1;1;1;1;1;1;1;1	8	8	0.2571	130644;495951;712418;241103;363454;640407;94805;137438	-	Mitochondrial carrier homolog 1 OS=Homo sapiens GN=MTCH1 PE=1 SV=1
5044_1	sp|O15037|KHNYN_HUMAN	13.3571	0.000204499	74487.4	GGNLVTGTQR;LAEETDGIIVSNDQFR;LYSLSLLSLTPSR	1;1;1	3	3	0.0575	133607;570940;389332	-	Protein KHNYN OS=Homo sapiens GN=KHNYN PE=1 SV=3
5473_1	sp|P50895|BCAM_HUMAN	28.4372	0	67362.6	DASFHCAAHYSLPEGR;LSVPPLVEVMR;LSWSQLGGSPAEPIPGR;LVLAEAQVGDER;QGWVSSSLTLK;VAYLDPLELSEGK	1;1;1;1;1;1	6	7	0.1274	575461;267517;546730;547169;302690;248794;379908	-	Basal cell adhesion molecule OS=Homo sapiens GN=BCAM PE=1 SV=2
2580_1	sp|P61081|UBC12_HUMAN	39.6161	0	20886.6	DINELNLPK;EAAEVLQNNR;EAAEVLQNNRR;FVFSFK;GGYIGSTYFER;LFEQNVQR;LVICPDEGFYK;RLFEQNVQR;TCDISFSDPDDLLNFK;VGQGYPHDPPK	1;1;1;1;1;1;1;1;1;1	10	24	0.4536	158458;158453;209763;301900;30622;30619;30618;30621;30623;273421;273419;273428;273422;148144;148151;148142;326231;326234;239255;602528;602524;602530;242244;242238	-	NEDD8-conjugating enzyme Ubc12 OS=Homo sapiens GN=UBE2M PE=1 SV=1
7299_1	sp|Q96S55|WRIP1_HUMAN	6.32703	0.00334572	72087.8	FVTLSATNAK;SIEVYSAYNNVK	1;1	2	2	0.0331	156161;353373	-	ATPase WRNIP1 OS=Homo sapiens GN=WRNIP1 PE=1 SV=2
1279_1	sp|Q9UL03|INT6_HUMAN	12.4175	0.000204499	100326	IFTLLK;LFALVLR;LVTGIDNYGQGR;TAFDLLNLNR	1;1;1;1	4	5	0.0395	16167;53828;53827;297749;231176	-	Integrator complex subunit 6 OS=Homo sapiens GN=INTS6 PE=1 SV=1
8312_1	sp|Q99584|S10AD_HUMAN	23.4962	0.000204499	11464.1	ELVTQQLPHLLK;FNEYWR;KDSLSVNEFK;LIGELAK;SLDVNQDSELKFNEYWR	1;1;1;1;1	5	13	0.4694	371835;371833;371834;371837;371836;371839;91880;224770;224744;224737;18558;685462;686001	-	Protein S100-A13 OS=Homo sapiens GN=S100A13 PE=1 SV=1
2427_1	sp|Q9H6S0|YTDC2_HUMAN	45.3521	0	160147	APSKPWSQVDEATIR;FTAGAFSDHMALLR;GIWSTTPSNER;IAVNIALER;IFCTQPR;LASNALQEPSSFR;LSQSLGLVSK;QSLPVFEK;SQDWGSAGLGGVFK;TQLLGQLR;TTANLAALK	1;1;1;1;1;1;1;1;1;1;1	11	15	0.0825	513911;513921;513888;514508;437051;272329;131888;94656;372164;147491;106410;106396;365806;97330;86879	-	Probable ATP-dependent RNA helicase YTHDC2 OS=Homo sapiens GN=YTHDC2 PE=1 SV=2
5672_1	sp|P63165|SUMO1_HUMAN	10.6435	0.000204499	11549.7	FLFEGQR;QGVPMNSLR;VIGQDSSEIHFK	1;1;1	3	3	0.2772	83135;140768;337296	-	Small ubiquitin-related modifier 1 OS=Homo sapiens GN=SUMO1 PE=1 SV=1
5988_1	sp|Q13370|PDE3B_HUMAN	16.7851	0.000204499	124255	FCNVELRPPPASPQQPR;IPTQQFMNYFR;LLVCQVCIK;TNAFLVATNAPQAVLYNDR	1;1;1;1	4	4	0.0504	641332;385884;203461;667737	-	cGMP-inhibited 3',5'-cyclic phosphodiesterase B OS=Homo sapiens GN=PDE3B PE=1 SV=2
6313_1	sp|Q96G25|MED8_HUMAN	7.37452	0.000765111	29061.8	NQVIIPLVLSPDRDEDLMR;QTFNPTDTNALVAAVAFGK	1;1	2	2	0.1418	707301;632291	-	Mediator of RNA polymerase II transcription subunit 8 OS=Homo sapiens GN=MED8 PE=1 SV=2
7843_1	sp|Q9NVH1|DJC11_HUMAN	44.4338	0	63238.7	AGFFGTVVEYGAER;AGLPGFYDPCVGEEK;AIYDIYGK;CFVTTNCALQFSSR;GLEMEGWEVVER;GVLHQVMVLDSEALR;LILTEASK;NTVGYLQWR;VIDVTVPLQCLVK;VLYQFR	1;1;1;1;1;1;1;1;1;1	10	16	0.2039	417904;417877;489295;103615;517184;379643;504208;74311;74309;74313;206053;206059;408225;408224;408223;50539	-	DnaJ homolog subfamily C member 11 OS=Homo sapiens GN=DNAJC11 PE=1 SV=2
39_1	sp|Q14814|MEF2D_HUMAN	7.66906	0.000765111	55903.4	LFQYASTDMDK;TNADIIETLR	1;1	2	2	0.0403	313420;211057	-	Myocyte-specific enhancer factor 2D OS=Homo sapiens GN=MEF2D PE=1 SV=1
3804_1	sp|Q6ZWJ1|STXB4_HUMAN	6.11616	0.00351617	61623.4	AVLASQTSLTPLGR	1	1	1	0.0253	369104	-	Syntaxin-binding protein 4 OS=Homo sapiens GN=STXBP4 PE=1 SV=2
1922_1	sp|Q99536|VAT1_HUMAN	57.704	0	41893.4	ACGLNFADLMAR;CLVLTGFGGYDK;ENGVTHPIDYHTTDYVDEIKK;EVAEAATGEDASSPPPK;GVDIVMDPLGGSDTAK;LPPLPVTPGMEGAGVVIAVGEGVSDRK;NLMALAR;TEAASDPQHPAASEGAAAAAASPPLLR;TVENVTVFGTASASK;VLLVPGPEK;VMVLNR;VVTYGMANLLTGPK	1;1;1;1;1;1;1;1;1;1;1;1	12	37	0.4656	325036;325042;334166;325068;334131;320283;320293;320281;320291;761179;761165;761391;761185;498398;456070;464396;456082;792498;41894;776737;776931;776937;776929;422535;422557;422524;423127;423115;108620;14764;397286;397281;406334;406331;406314;397699;406321	-	Synaptic vesicle membrane protein VAT-1 homolog OS=Homo sapiens GN=VAT1 PE=1 SV=2
4315_1	sp|Q8N9N2|ASCC1_HUMAN	7.22418	0.000765111	45480.6	FQASGLIVK;IDVLLDTFRR	1;1	2	3	0.0475	114523;272695;272704	-	Activating signal cointegrator 1 complex subunit 1 OS=Homo sapiens GN=ASCC1 PE=1 SV=1
36_1	sp|Q9HAB8|PPCS_HUMAN	76.8921	0	33983.8	AFIISFK;ALEIYQHQVVVANILESR;FLDNFSSGR;FLDNFSSGRR;HTAFIGDR;HTAFIGDRN;IQSSGGPLQITMK;IVDNLQSR;KALEIYQHQVVVANILESR;LETDPAIVINR;LLLSEEEIEK;LLLSEEEIEKGVEIEEK;LLSPLVK;QSFVFIVTK;SAFPYAHR;VPLEARPVR;VVLVTSGGTK;WAEVMAR	1;1;1;1;1;1;1;1;1;1;1;1;1;1;1;1;1;1	18	70	0.463	50611;50602;50613;50599;50610;50594;50612;50595;50597;50592;50614;50604;50574;50591;668858;668851;668849;668850;151035;151041;244518;93042;146708;146705;337473;346400;337460;337461;346479;337459;346475;338191;337462;337453;346402;104708;104695;104704;104697;104687;104698;703844;703845;268088;268079;246872;246875;638923;638928;638933;638927;638925;638924;638926;28864;28868;28870;28871;28873;164861…	-	Phosphopantothenate--cysteine ligase OS=Homo sapiens GN=PPCS PE=1 SV=2
2146_1	sp|Q13098|CSN1_HUMAN	64.4526	0	55501.2	AESTPEIAEQR;ALIQYFSPYVSADMHR;DSQTQAILTK;EGSQGELTPANSQSR;ELQNAPDAIPESGVEPPALDTAWVEATR;GERDSQTQAILTK;GHDDLGDHYLDCGDLSNALK;LFLELEPQVR;LQFIADHCPTLR;MALSFVQR;NQIHVK;NVISSSSFK;TFNVDMYEEIHR;TFNVDMYEEIHRK;TLYTQIR	1;1;1;1;1;1;1;1;1;1;1;1;1;1;1	15	32	0.3422	261892;606620;606614;606621;606619;613247;185511;449488;829986;829902;830080;829901;387406;704943;704942;270196;270213;400807;400804;108367;108370;116777;17182;117176;117179;117182;445328;445326;512235;512247;82361;82343	-	COP9 signalosome complex subunit 1 OS=Homo sapiens GN=GPS1 PE=1 SV=4
1178_1	sp|Q13614|MTMR2_HUMAN	7.63249	0.000765111	73335	KVEELQR;LYDPLLEYR;YLQAIMDSNAQSHK	0;1;1	2	2	0.0467	85574;234250;472138	-	Myotubularin-related protein 2 OS=Homo sapiens GN=MTMR2 PE=1 SV=4
1178_2	sp|Q9P2M7|CING_HUMAN	148.059	0	136304	ATIYGILR;AVAGQGELTR;DQEVEHVR;EGSSESETSVR;ELEETSEETGHWQSMFQK;ELLEEVLEGK;ETQEENDEFR;EVEEQHEVNEQLQAR;FITEPVSGAEMGTLR;HGLETQVMELQNK;HVQGPEPAKEVLLK;ILGLEQQLK;KVEELQR;LASSEGFQKPSASLSQLESQNQLLQER;LDKELLAQR;LETELDEEKNTVELLTDR;LGQEQQTLNR;MQPLVMVSSGSTK;MVAEAEATVLGQR;QALQQLQAQLEDYKEK;QKLEPSQVGLER;QPAQSQNLSPLSGFSR;QQLEEALNASQEEEGSLAAAK;QTQDWVLQSFEEPRR;RAAVETTLR;SAQDPTMLQFK;SMQDATQDHAVLEAER;SNSMLELAPK;TVLQSTN…	1;1;1;1;1;1;1;1;1;1;1;1;0;1;1;1;1;1;1;1;1;1;1;1;1;1;1;1;1;1;1;1	31	42	0.3492	88603;88597;88606;133065;137750;225014;699788;219601;219592;299836;583993;473285;431056;441428;150902;85574;829911;173640;173625;686577;686572;237265;340350;345908;355069;620444;620445;351502;351501;530191;530719;705521;615176;140570;281780;568579;568199;176269;93883;693504;693522;543149;35215	-	Cingulin OS=Homo sapiens GN=CGN PE=1 SV=2
3097_1	sp|P38570|ITAE_HUMAN	5.08265	0.00789293	130077	GLQVVAVK;LRGLQVVAVK	1;1	2	2	0.0085	45298;172345	-	Integrin alpha-E OS=Homo sapiens GN=ITGAE PE=1 SV=3
6291_1	sp|Q96C36|P5CR2_HUMAN	8.06199	0.00039093	33615.7	IIASSPEMNLPTVSALR;LAIQLGAQALLGAAK;MGVNLTR	1;1;1	3	3	0.1219	567647;382331;36198	-	Pyrroline-5-carboxylate reductase 2 OS=Homo sapiens GN=PYCR2 PE=1 SV=1
5003_1	sp|Q8WU39|MZB1_HUMAN	6.11616	0.00351617	20681.2	ELSELVYTDVLDR	1	1	1	0.0688	444637	-	Marginal zone B- and B1-cell-specific protein OS=Homo sapiens GN=MZB1 PE=1 SV=1
2144_1	sp|P31751|AKT2_HUMAN	31.0565	0	55733.1	AIQMVANSLK;DEVAHTVTESR;ERPEAPDQTLPPLNNFSVAECQLMK;HPFLTALK;ITDFGLCK;LLPPFKPQVTSEVDTR;SDGSFIGYK;SLLAGLLK;TFCGTPEYLAPEVLEDNDYGR	1;1;1;0;0;1;1;1;0	6	10	0.2412	167223;177145;269750;820148;820354;96430;109230;579021;579372;119202;45630;45638;756119	-	RAC-beta serine/threonine-protein kinase OS=Homo sapiens GN=AKT2 PE=1 SV=2
2144_2	sp|P31749|AKT1_HUMAN	29.5225	0	55650.8	DEVAHTLTENR;EAPLNNFSVAQCQLMK;EEWTTAIQTVADGLK;ERPQDVDQR;FFAGIVWQHVYEK;HPFLTALK;ITDFGLCK;LSPPFKPQVTSETDTR;NDGTFIGYK;SLLSGLLK;TFCGTPEYLAPEVLEDNDYGR	1;1;1;1;1;0;0;1;1;1;0	8	10	0.2792	293006;588715;501655;209228;481396;96430;109230;569135;139161;53141;53165;53125;756119	-	RAC-alpha serine/threonine-protein kinase OS=Homo sapiens GN=AKT1 PE=1 SV=2
4026_1	sp|P06312|KV401_HUMAN	12.7951	0.000204499	13371.6	ESGVPDR;LLIYWASTR;SSQSVLYSSNNK	1;1;1	3	9	0.2314	24730;196457;196451;196461;196448;196447;196464;310013;310008	-	Immunoglobulin kappa variable 4-1 OS=Homo sapiens GN=IGKV4-1 PE=1 SV=1
6957_1	sp|P56937|DHB7_HUMAN	30.2911	0	38181.8	ELEPLLCHSDNPSQLIWTSSR;KSNFSLEDFQHSK;LDCIYLNAGIMPNPQLNIK;MDLDEDTAEK;VVLITGASSGIGLALCK;YATDLLSVALNR;YLSATTGFGR	1;1;1;1;1;1;1	7	10	0.2991	762806;762979;451710;698060;697783;224514;500243;323892;323880;166208	-	3-keto-steroid reductase OS=Homo sapiens GN=HSD17B7 PE=1 SV=1
922_1	sp|P28161|GSTM2_HUMAN	10.5017	0.000204499	25728	ISAYMK;ITQSNAILR;KYTMGDAPDYDR;LKPEYLQALPEMLK;LLLEYTDSSYEEK;LLLEYTDSSYEEKK;LYSQFLGK;MAVWGNK;NQVFEPSCLDAFPNLK;SQWLNEK;YTMGDAPDYDR	0;0;0;1;0;0;1;0;1;0;0	3	3	0.422	6112;12974;6119;140098;140091;140090;140103;140088;140086;140095;378497;387667;378473;387663;387664;378471;507966;463753;463793;463766;463757;463752;463756;530652;530640;110579;42125;48880;42123;42120;599738;87036;87033;304138	-	Glutathione S-transferase Mu 2 OS=Homo sapiens GN=GSTM2 PE=1 SV=2
7802_1	sp|Q68EM7|RHG17_HUMAN	48.0469	0	95377.3	AALDCSTSHLDEFYSDPHAVAGALK;AESSSGGGTVPSSAGILEQGPSPGDGSPPKPK;ALAVLEK;DQLAADMYNFMAK;LAQTSDVNK;LPLTALAQNMQEASTQLEDSLLGK;LPPQNFVNFR;LVACFQGQHGTDAER;LVLDWDSVR;RLVACFQGQHGTDAER;TEVLSEDLLQIER	1;1;1;1;1;1;1;1;1;1;1	11	16	0.1793	794260;794258;794259;825817;18543;426590;120131;782680;262569;262579;515909;184134;184163;586046;586038;441291	-	Rho GTPase-activating protein 17 OS=Homo sapiens GN=ARHGAP17 PE=1 SV=1
922_3	sp|Q03013|GSTM4_HUMAN	12.1213	0.000204499	25544.8	HNLCGETEEEK;IFEPNCLDAFPNLK;ISAYMK;ITQSNAILCYIAR;KHNLCGETEEEK;KYTMGDAPDYDR;LGLDFPNLPYLIDGAHK;LLLEYTDSSYEEK;LLLEYTDSSYEEKK;SQWLNEK;VAVWGNK;VDILENQAMDVSNQLAR;YTMGDAPDYDR	0;1;0;0;0;0;0;0;0;0;1;1;0	3	7	0.5413	328923;510405;510380;6112;12974;6119;429299;429291;429302;429296;429286;429677;429290;429295;429305;402100;402096;402098;402095;378497;387667;378473;387663;387664;378471;601277;463753;463793;463766;463757;463752;463756;530652;530640;87036;87033;30287;30293;613989;614405;614443;304138	-	Glutathione S-transferase Mu 4 OS=Homo sapiens GN=GSTM4 PE=1 SV=3
922_5	sp|P09488|GSTM1_HUMAN	15.8866	0.000204499	25695.1	CLDAFPNLK;CLDAFPNLKDFISR;HNLCGETEEEK;ISAYMK;ITQSNAILCYIAR;KHNLCGETEEEK;KYTMGDAPDYDR;LGLDFPNLPYLIDGAHK;LKLYSEFLGK;LLLEYTDSSYEEK;LLLEYTDSSYEEKK;LYSEFLGK;MAVWGNK;PMILGYWDIR;SQWLNEK;YLEELPEK;YLEELPEKLK;YTMGDAPDYDR	1;1;0;0;0;0;0;0;1;0;0;1;0;1;0;1;1;0	7	17	0.5917	168593;168600;168599;519350;519348;519342;519351;328923;6112;12974;6119;429299;429291;429302;429296;429286;429677;429290;429295;429305;402100;402096;402098;402095;378497;387667;378473;387663;387664;378471;601277;244087;463753;463793;463766;463757;463752;463756;530652;530640;111025;111026;42125;48880;42123;42120;280745;280741;290614;87036;87033;142273;279973;279970;279969;304138	-	Glutathione S-transferase Mu 1 OS=Homo sapiens GN=GSTM1 PE=1 SV=3
922_4	sp|P21266|GSTM3_HUMAN	65.3889	0	26542.1	CLDEFPNLK;FSWFAGEK;HNMCGETEEEK;IAAYLQSDQFCK;IRVDIIENQVMDFR;ITQSNAILR;LKPQYLEELPGQLK;LLLEFTDTSYEEK;LLLEFTDTSYEEKR;MAQWGNKPVC;MPINNK;QFSMFLGK;RYTCGEAPDYDR;SQWLDVK;VDIIENQVMDFR;YTCGEAPDYDR	1;1;1;1;1;0;1;1;1;1;1;1;1;1;1;1	15	43	0.5911	205312;205305;205325;118206;118209;118207;118208;339487;339488;385274;385273;385281;385872;544895;552376;140098;140091;140090;140103;140088;140086;140095;498680;498677;498681;498683;498678;498679;462616;543039;543024;543025;543026;239540;15134;8225;15133;111444;119215;111452;111451;417796;74550;74529;405656;405658;413621;405655;405672;329531	-	Glutathione S-transferase Mu 3 OS=Homo sapiens GN=GSTM3 PE=1 SV=3
5098_1	sp|Q96BY7|ATG2B_HUMAN	14.0258	0.000204499	232616	FIGTGIK;LATSQMNK;LSPSWNPK;VTFIDTVLR	1;1;1;1	4	4	0.0154	16411;81229;97080;162720	-	Autophagy-related protein 2 homolog B OS=Homo sapiens GN=ATG2B PE=1 SV=5
1369_1	sp|O75340|PDCD6_HUMAN	40.8943	0	21854.8	AGVNFSEFTGVWK;DNSGMIDKNELK;LSDQFHDILIR;LSDQFHDILIRK;LTDIFR;QALSGFGYR;SIISMFDR;SIISMFDRENK;YITDWQNVFR	1;1;1;1;1;1;1;1;1	9	38	0.3822	384212;384217;384215;384210;384205;339670;335665;335643;335658;335647;335652;335670;335655;408702;408701;27139;27134;27110;131750;117133;117145;117139;124423;117127;124424;117130;325699;325705;334860;325707;334843;334839;326785;326787;326780;326792;326789;327466	-	Programmed cell death protein 6 OS=Homo sapiens GN=PDCD6 PE=1 SV=1
5536_2	sp|P07814|SYEP_HUMAN	278.973	0	170483	AALLNQHYQVNFK;AIQGGTSHHLGQNFSK;AKINEAVECLLSLK;DNYSPGWK;DQDLEPGAPSMGAK;EAPCVLIYIPDGHTK;EDVDAAVK;EENLADWYSQVITK;EKTGQEYKPGNPPAEIGQNISSNSSASILESK;ERPTPSLNNNCTTSEDSLVLYNR;EVIPVNVPEAQEEMK;EVIPVNVPEAQEEMKEVAK;EYIPGQPPLSQSSDSSPTR;FDDTNPEK;FNHWELK;FPPEASGYLHIGHAK;FVELPGAEMGK;GFFICDQPYEPVSPYSCK;GNAAWQEQLK;GSQFGQSCCLR;HEELMLGDPCLK;IISLDAK;INEAVECLLSLK;IQPHPR;IVQIPFCGEIDCEDWIKK;IWAFNK;KEENLADWYSQVITK;KGDIIQ…	1;1;1;1;1;1;1;1;1;1;1;1;1;0;1;1;1;1;1;1;1;1;1;1;1;1;1;1;1;1;1;1;1;1;1;1;1;1;1;1;1;1;1;1;1;1;1;1;1;1;1;1;1;1;1;1;1;1;1	58	168	0.459	441811;441803;512384;512382;512383;512373;512400;512374;512372;462847;116084;378519;369743;379066;527672;527682;527669;60425;519278;859676;859831;859771;795009;795139;795010;527212;684373;657677;658166;115543;119230;481381;481401;481399;481391;481388;481382;481376;231563;231557;241572;241577;699273;699271;699521;210365;301692;384158;384106;384105;25305;354130;354128;354127;20179;714209;714429;319…	-	Bifunctional glutamate/proline--tRNA ligase OS=Homo sapiens GN=EPRS PE=1 SV=5
167_1	sp|Q15643|TRIPB_HUMAN	25.477	0.000204499	227447	ALAFEQLLK;DLEIQALHAR;LMSLANSSEGKVDK;LQQALSDAENEIMR;LQVDYTGLIQSYEQNETK;TIQVLQIEK	1;1;1;1;1;1	6	6	0.0374	147997;224221;405715;478132;682082;166123	-	Thyroid receptor-interacting protein 11 OS=Homo sapiens GN=TRIP11 PE=1 SV=3
5536_1	sp|P47897|SYQ_HUMAN	188.41	0	87742.9	AFIHWVSQPLMCEVR;AINFNFGYAK;AMAVLESLR;ANNGICFLR;ATGILLYGLASR;DRPMEESLLLFEAMR;DVLNDTAPR;DVVENGETADQTLSLMEQLR;EAATQAQQTLGSTIDK;FDDTNPEK;FDDTNPEKEEAK;FHKPGENYK;GEELKGHNTLPSPWR;GFHQVPFAPIVFIER;GFPPEAINNFCAR;GHNTLPSPWR;GKFSEGEATLR;GLAYVCHQR;GPSGCVESLEVTCR;HRPQLLVER;HTGYVIELQHVVK;IHTEPQLSAALEYVR;ILQLVATGAVR;KIHTEPQLSAALEYVR;LAWGQPVGLR;LFTLTALR;LGYFSVDPDSHQGK;LNLHYAVVSK;MIKNEVDMQVLHLLGPK;NEVDMQVLHLLGPK;N…	1;1;1;1;1;1;1;1;1;0;1;1;1;1;1;1;1;1;1;1;1;1;1;1;1;1;1;1;1;1;1;1;1;1;1;1;1;1;1;1	39	137	0.5819	597047;603308;210388;210380;126707;162942;163390;162941;163395;264462;264463;264452;264455;264467;264459;264479;264454;583227;132452;713714;713724;713703;714191;713962;713720;713966;713970;713974;714393;501607;501618;501600;115543;373815;373830;194135;194129;532144;532135;549046;549055;549025;412492;412509;412497;412482;412998;412481;412508;223530;242294;184572;184576;444142;444144;212367;212368;…	-	Glutamine--tRNA ligase OS=Homo sapiens GN=QARS PE=1 SV=1
3924_1	sp|P21359|NF1_HUMAN	10.0148	0.000204499	319168	IGQYLSSNR;ISSSQQHPHLR;SQLFLK	1;1;1	3	3	0.0092	149429;295886;16417	-	Neurofibromin OS=Homo sapiens GN=NF1 PE=1 SV=2
5983_1	sp|Q9NY93|DDX56_HUMAN	21.0881	0.000204499	61551	GLVLVPTK;IEELLSGENR;ILSHLQQDSLK;KATGPVVEQAVR;SLLFVNTLER	1;1;1;1;1	5	8	0.0932	51020;51021;51011;220100;291787;276553;276550;240493	-	Probable ATP-dependent RNA helicase DDX56 OS=Homo sapiens GN=DDX56 PE=1 SV=1
225_1	sp|Q9NYH9|UTP6_HUMAN	5.82535	0.00384481	70148.8	ALLAVIGADSVTLK;MIQFEK	1;1	2	2	0.0335	344049;37904	-	U3 small nucleolar RNA-associated protein 6 homolog OS=Homo sapiens GN=UTP6 PE=2 SV=2
5291_1	sp|P52566|GDIR2_HUMAN	19.3129	0.000204499	22973.6	APEPHVEEDDDDELDSK;APNVVVTR;ATFMVGSYGPRPEEYEFLTPVEEAPK;ELQEMDKDDESLIK	1;1;1;1	4	6	0.3234	622441;65047;65044;826631;828136;517710	-	Rho GDP-dissociation inhibitor 2 OS=Homo sapiens GN=ARHGDIB PE=1 SV=3
265_1	sp|Q13615|MTMR3_HUMAN	8.65232	0.00039093	133534	LLILDAR;VPVPSQQLFEPSR	1;1	2	2	0.0167	45269;408087	-	Myotubularin-related protein 3 OS=Homo sapiens GN=MTMR3 PE=1 SV=3
6299_1	sp|P58557|YBEY_HUMAN	14.2418	0.000204499	19286	FDLGIICVDNK;NIQHINR;NVPTDVLSFPFHEHLK	1;1;1	3	6	0.2036	298228;82310;600144;600135;600510;600138	-	Putative ribonuclease OS=Homo sapiens GN=YBEY PE=1 SV=2
7669_1	sp|Q9H9A6|LRC40_HUMAN	72.6997	0	68207.1	DCGTSVPQGLLK;ELHVGENQIEMLEAEHLK;FLALEGNPLR;FLPEFPSCSLLK;IAGQDLR;ILPEEITNLR;INVDIPEEANQNLSFGATER;LDLSNNDISSLPYSLGNLHLK;LIISNNK;LNLSSNELK;LNVSHNK;LQSLTDDLR;LTFLDLR;NLSEVPQCVWR;QATLIPDEVFDAVK;SNIVTSINFSK;SVPDEIILLR;TLLLDGNPFR	1;1;1;1;1;1;1;1;1;1;1;1;1;1;1;1;1;1	18	22	0.3405	287232;287219;287235;679575;201386;382110;382118;29793;244032;705787;729373;40745;140939;44474;161124;76064;76065;353305;441814;251397;217282;211122	-	Leucine-rich repeat-containing protein 40 OS=Homo sapiens GN=LRRC40 PE=1 SV=1
2661_1	sp|Q9UBU8|MO4L1_HUMAN	12.8846	0.000204499	41447.6	EYAVNEVVAGIK;GNTDNKEYAVNEVVAGIK;QLFYLPAK	1;1;1	3	4	0.0718	297297;616104;616399;122369	-	Mortality factor 4-like protein 1 OS=Homo sapiens GN=MORF4L1 PE=1 SV=2
6019_1	sp|P06748|NPM_HUMAN	73.4513	0	32554.8	ADKDYHFK;CGSGPVHISGQHLVAVEEDAESEDEEEEDVK;DELHIVEAEAMNYEGSPIK;DYHFKVDNDENEHQLSLR;FINYVK;GPSSVEDIK;LKCGSGPVHISGQHLVAVEEDAESEDEEEEDVK;MQASIEK;MSVQPTVSLGGFEITPPVVLR;MTDQEAIQDLWQWR;SKGQESFK;TVSLGAGAK;TVSLGAGAKDELHIVEAEAMNYEGSPIK;VDNDENEHQLSLR;VTLATLK	1;1;1;1;1;1;1;1;1;1;1;1;1;1;1	15	471	0.5238	143370;143373;143376;143387;143366;143365;143363;860827;860826;686050;690005;690011;686079;686074;690010;686044;686065;686069;690014;686078;690001;686303;686307;686047;690012;689987;686048;686311;690023;686063;686075;686058;686057;690002;686056;689999;686067;686049;686066;686324;686061;686068;686314;686062;686059;686080;686053;686041;686043;686064;686076;690216;690218;686045;686087;686322;686040;…	-	Nucleophosmin OS=Homo sapiens GN=NPM1 PE=1 SV=2
1307_1	sp|Q9NRG4|SMYD2_HUMAN	10.3192	0.000204499	49655.6	AEGLGGLER;LECSPMVVFGENWNPSETVR;NVIEEFRR	1;1;1	3	3	0.0855	85324;738240;162100	-	N-lysine methyltransferase SMYD2 OS=Homo sapiens GN=SMYD2 PE=1 SV=2
3534_2	sp|Q9UQE7|SMC3_HUMAN	95.1199	0	141454	AILNGIDSINK;DFVEDDTTHG;EENAEQQALAAK;ETEGGTVLTATTSELEAINKR;GALTGGYYDTR;GSGSQSSVPSVDQFTGVGIR;INELLK;INQMATAPDSQR;IRELGSLPQEAFEK;KYEAIQLTFK;LFYHIVDSDEVSTK;LHTLEEEKEELAQYQK;MNLPGEVTFLPLNK;NFSEVFQK;QVIIQGFR;RLDQVEQELNELR;SEDLDNSIDKTEAGIK;SLQSLEASLHAMESTR;SNPYYIVK;VETYLNENLRK;VLDHFR;VSHIDVITAEMAK	1;1;1;1;1;1;0;1;1;1;1;1;1;1;1;1;1;1;1;1;1;1	21	34	0.2219	219011;205235;303092;706791;229188;632201;13864;321502;321546;477933;477925;268107;268093;268077;496879;639178;639166;455203;455200;464127;455201;131738;113527;490901;539436;539045;550453;550457;550450;123970;349189;348446;34539;368949;368934	-	Structural maintenance of chromosomes protein 3 OS=Homo sapiens GN=SMC3 PE=1 SV=2
3534_3	sp|O75116|ROCK2_HUMAN	91.8941	0	160799	EFINLQSALESER;EFINLQSALESERR;ELQDQLEAEQYFSTLYK;EQEFPVEPVGEK;ETAAPVVPELSSDIDSSNFDDIEDDKGDVETFPIPK;GAFGEVQLVR;IFQILYANEGESK;IFQILYANEGESKK;INELLK;KPPAPDPFAR;LADFGTCMK;LAEIMNR;LEGWLSLPVR;LFHVRPVTQTDVYR;MPGAPETAPGDGAGASR;MQTQQVNTLK;NDQWHWDNIR;NIDNFLNR;NLLLLANSTEEQQK;QLDETNALLR;SQLQALHIGLDSSSIGSGPGDAEADDGFPESR;TLTSDVANLANEKEELNNK;VIQQSLEQEEAEHK;VNQLQR;VYYDISTAK	1;1;0;1;1;0;1;1;0;1;0;0;1;1;1;1;1;1;1;1;1;1;1;1;1	20	31	0.2219	437069;436485;517407;517390;675716;353318;879532;167734;167707;423152;489997;490012;489995;489988;13864;180144;180135;180134;151003;60496;226612;537253;439574;239723;239733;351149;351144;135218;470358;229368;849467;675156;674933;504662;504668;23759;160311	-	Rho-associated protein kinase 2 OS=Homo sapiens GN=ROCK2 PE=1 SV=4
5867_1	sp|O75794|CD123_HUMAN	14.7242	0.000204499	39110.2	DYTQYYDHISK;LNWSAPR;SVILPLPQNVK;VQEAINSLGGSVFPK	1;1;1;1	4	5	0.131	379065;58704;250442;441839;441842	-	Cell division cycle protein 123 homolog OS=Homo sapiens GN=CDC123 PE=1 SV=1
4029_1	sp|P12110|CO6A2_HUMAN	62.2731	0	108512	AREEGIR;DDDLNLR;DIASTPHELYR;DVTVTAIGIGDMFHEK;DYDSLAQPGFFDR;HESENLYSIACDKPQQVR;LFAVAPNQNLK;LGEQNFHK;NDYATMLPDSTEIDQDTINR;NFVINVVNR;NLEWIAGGTWTPSALK;NLQGISSFR;YGGLHFSDQVEVFSPPGSDR	1;1;1;1;1;1;1;1;1;1;1;1;1	13	39	0.1619	52855;67126;303119;303116;538095;433236;433240;693907;693912;694212;254437;254441;118706;728980;729487;728977;729486;167264;167267;167253;167265;543090;543095;543087;543491;142699;142713;142707;699309;699303;699315;699314;699307;699306;699311;699308;699300;699317;699310	-	Collagen alpha-2(VI) chain OS=Homo sapiens GN=COL6A2 PE=1 SV=4
8423_1	sp|Q99575|POP1_HUMAN	33.3504	0	114636	AAEISAMLK;EACLSILGHFPR;EAEEVMDAGCQESAGPER;ITDQEASENHVAATGSHLCVLR;LIGPLSHSILTEAIK;QGSLVLYR;SQTELPDEK	1;1;1;1;1;1;1	7	9	0.0908	99962;360120;632109;749790;749773;749796;465512;100942;152976	-	Ribonucleases P/MRP protein subunit POP1 OS=Homo sapiens GN=POP1 PE=1 SV=2
434_1	sp|P19404|NDUV2_HUMAN	68.1473	0	27374	AAAVLPVLDLAQR;DIEEIIDELK;DTPENNPDTPFDFTPENYK;DTPENNPDTPFDFTPENYKR;FSCEPAGGLTSLTEPPK;FSCEPAGGLTSLTEPPKGPGFGVQAGL;NSDSILEAIQK;NSDSILEAIQKK;QNGWLPISAMNK;VAEVLQVPPMR;VYEVATFYTMYNR;YHIQVCTTTPCMLR	1;1;1;1;1;1;1;1;1;1;1;1	12	49	0.5301	324442;324440;324443;324439;324444;324445;255427;712206;712015;712010;747741;747556;747558;747735;747559;747555;563862;563861;563858;563856;794150;794144;794141;794146;794308;255927;329303;329336;329315;329884;336761;336772;336738;337313;266901;266887;266891;266899;276419;507564;498809;507565;498805;508112;499204;508106;566162;559049;566158	-	NADH dehydrogenase [ubiquinone] flavoprotein 2, mitochondrial OS=Homo sapiens GN=NDUFV2 PE=1 SV=2
1138_1	sp|Q08380|LG3BP_HUMAN	57.8694	0	65289.3	ASHEEVEGLVEK;AVDTWSWGER;ELSEALGQIFDSQR;IYTSPTWSAFVTDSSWSAR;LADGGATNQGR;RIDITLSSVK;SDLAVPSELALLK;SLGWLK;STSSFPCPAGHFNGFR;TIAYENK;VEIFYR;YSSDYFQAPSDYR;YYPYQSFQTPQHPSFLFQDK	1;1;1;1;1;1;1;1;1;1;1;1;1	13	18	0.2684	318557;249071;465933;690224;160264;202781;202778;335215;335207;335210;2935;554671;56550;56556;50835;468917;770212;770366	-	Galectin-3-binding protein OS=Homo sapiens GN=LGALS3BP PE=1 SV=1
3572_1	sp|Q5VYK3|ECM29_HUMAN	163.031	0	204160	AGEQLAPFLPQLVPR;AIACVVTACSAELEK;AIQTLGYFPVGDGDFPHQK;ALQSQSWK;DAWQMTEEEYTPPAGAK;DNHSPEIQHGSLLALGFTVGR;EGAVLKPELK;EIQSAFVSVLSENDELSQDVASK;ELCSLASDLSQPDLVYK;ESSCLALNDLLR;FASTVFPSDHIPSR;FLPPVLLK;FVDKTEWIK;HEVSGETVVFQGGALGK;HIISPNPHVR;HSVATAADLELK;IVAISCAADILK;LHLVESLLSR;LLLQGLMDSVEAK;LMSALLSGLTDR;QSLIDWNNPAIINK;SASPFNLAEKPK;SCAFAMGHLVR;SITYSLENK;SLMNNSK;SMIEQLIK;SVPNQPSTNEILQAVLK;TLMSSGQMAPSSSNK;TSCA…	1;1;1;1;1;1;1;1;1;1;1;1;1;1;1;1;1;1;1;1;1;1;1;1;1;1;1;1;1;1;1;1;1;1	34	55	0.2341	487861;487869;487864;480341;671170;671180;671189;106336;616859;714071;172277;765108;765278;765104;765431;621993;355018;449117;449111;449113;96458;96459;96460;224211;224198;529084;226556;276383;286722;286718;224956;224968;224943;224967;370531;289024;483021;295458;295449;295504;272968;157663;157665;37239;114045;114041;583784;430277;301920;301919;229995;623359;747924;141039;246391	-	Proteasome-associated protein ECM29 homolog OS=Homo sapiens GN=ECM29 PE=1 SV=2
3154_1	sp|Q15121|PEA15_HUMAN	12.2323	0.000204499	15030.8	ISEEDELDTK;RPDLLTMVVDYR	1;1	2	4	0.1692	232263;405073;405075;413300	-	Astrocytic phosphoprotein PEA-15 OS=Homo sapiens GN=PEA15 PE=1 SV=2
3374_1	sp|Q9H0N5|PHS2_HUMAN	5.44618	0.00555266	14356.4	MNHHPEWFNVYNK;NQAILDLK	1;1	2	2	0.1615	529448;92081	-	Pterin-4-alpha-carbinolamine dehydratase 2 OS=Homo sapiens GN=PCBD2 PE=1 SV=4
7439_1	sp|P61978|HNRPK_HUMAN	103.682	0	50944.4	DLAGSIIGK;ENTQTTIK;GGDLMAYDR;GGDLMAYDRR;GSDFDCELR;GSYGDLGGPIITTQVTIPK;IDEPLEGSEDR;IILDLISESPIK;IILDLISESPIKGR;IITITGTQDQIQNAQYLLQNSVK;ILLQSK;LFQECCPHSTDR;LLIHQSLAGGIIGVK;NAGAVIGK;NLPLPPPPPPR;NTDEMVELR;RPAEDMEEEQAFK;RPAEDMEEEQAFKR;SRNTDEMVELR;TDYNASVSVPDSSGPER;VVLIGGKPDR	1;1;1;1;1;1;1;1;1;1;1;1;1;1;1;1;1;1;1;1;1	21	139	0.4471	73895;73880;100344;100337;131028;216359;181535;614541;614545;614540;614940;278517;278518;278525;326540;326524;326538;326530;326528;326533;326525;326532;326531;326534;326535;326549;326523;326526;326544;326527;326553;326539;326546;326521;326548;326556;326522;326552;326517;326557;326554;326560;326543;326558;326545;326502;326551;445698;445699;782694;782695;782836;782693;1917;1910;1914;1930;443525;443…	-	Heterogeneous nuclear ribonucleoprotein K OS=Homo sapiens GN=HNRNPK PE=1 SV=1
2345_2	sp|P16278|BGAL_HUMAN	91.481	0	76026.6	AGATLDLLVENMGR;AYVAVDGIPQGVLER;DSFLKDGQPFR;ESILLR;FEKVPEGPIPPSTPK;GQVWINGFNLGR;HHLGDDVVLFTTDGAHK;HHLGDDVVLFTTDGAHKTFLK;LMPPPPQK;MFEIDYSR;QHYGFVLYR;SLYPLTFIQVK;SSDPDYLAAVDK;TEAVASSLYDILAR;TTLPQDCSNPAPLSSPLNGVHDR;TVGAALDILCPSGPIK;VNYGAYINDFK;VPEGPIPPSTPK;WLGVLLPK;YISGSIHYSR	1;1;1;1;1;1;1;1;1;1;1;1;1;1;1;1;1;1;1;1	20	129	0.3309	403830;394713;394699;394709;394721;403832;403860;462268;462285;462286;462292;462271;462293;462290;462276;462303;462278;462802;307936;307917;307930;14387;14351;481044;481046;481048;481050;481052;338177;338168;338164;338175;338839;338768;338157;338749;338790;592725;592707;592711;592713;592704;592709;592721;592715;592723;592698;592717;738371;88909;160752;160753;235005;234997;235022;235009;307679;307…	-	Beta-galactosidase OS=Homo sapiens GN=GLB1 PE=1 SV=2
1005_1	sp|Q9HBI0|PARVG_HUMAN	11.9862	0.000204499	37461.9	EAIVNFVNQK;LEAEDIALTATSQK;LTVVLEAVNR	1;1;1	3	4	0.1027	221504;411029;411053;190729	-	Gamma-parvin OS=Homo sapiens GN=PARVG PE=1 SV=1
7666_1	sp|Q9Y6D9|MD1L1_HUMAN	35.6936	0	83015.6	AILGSYDSELTPAEYSPQLTR;ETNGLLQEELEGLQR;FVVELQQR;GGTVPADLEAAAASLPSSK;LKEVFQTK;SHLIQVER;SQSSSAEQSFLFSR	1;1;1;1;1;1;1	7	11	0.1295	728885;535841;141506;542154;542159;542168;542152;542211;128696;123235;449009	-	Mitotic spindle assembly checkpoint protein MAD1 OS=Homo sapiens GN=MAD1L1 PE=1 SV=2
6150_1	sp|Q92917|GPKOW_HUMAN	14.6083	0.000204499	52196.6	GLGLGANLTEAQALTPTGPSR;RQPPARPPGPSTDTGALADGVVSQAVK;VMVVLGPQTGR	1;1;1	3	6	0.1239	651203;650919;794062;794196;794063;218252	-	G patch domain and KOW motifs-containing protein OS=Homo sapiens GN=GPKOW PE=1 SV=2
4577_1	sp|Q9Y512|SAM50_HUMAN	49.9287	0	51943.3	DVVVQHVHFDGLGR;GMSAEYSFPIWK;ICDGVQFGAGIR;LPNLLGR;NFSVNLYK;NLIEVMR;NSSILPR;QEILENKDVVVQHVHFDGLGR;SSLSHAMVIDSR;VNQELAGYTGGDVSFIK;VTGQFPWSSLR	1;1;1;1;1;1;1;1;1;1;1	11	20	0.2431	457752;457736;369768;297674;33134;124467;74176;34589;34580;34581;34592;34601;34606;34595;753956;303816;566993;567557;289452;289453	-	Sorting and assembly machinery component 50 homolog OS=Homo sapiens GN=SAMM50 PE=1 SV=3
2775_2	sp|P12081|SYHC_HUMAN	38.0319	0	57374.2	AELLYK;ASAELIEEEVAK;EKVFDVIIR;HGAEVIDTPVFELK;IFSIVEQR;LIYDLK;LVSELWDAGIK;TTETQVLVASAQK;VFDVIIR;VPCVGLSIGVER;YDGLVGMFDPK;YDLTVPFAR	1;1;1;1;1;1;1;1;1;0;0;0	9	11	0.2181	16604;295435;193911;193905;446023;446026;128206;27178;262083;346522;67849;293673;268314;268310;171063	-	Histidine--tRNA ligase, cytoplasmic OS=Homo sapiens GN=HARS PE=1 SV=2
2775_1	sp|P49590|SYHM_HUMAN	27.8268	0	56851.7	DLSPQHMVVR;ENFVAEIQKR;IFYIVEQR;ILDLVISCFK;TTETQVFVATPQK;TTETQVFVATPQKNFLQER;VPCVGLSIGVER;YDGLVGMFDPK;YDLTVPFAR	1;1;1;1;1;1;0;0;0	6	7	0.1759	234227;263707;263700;164490;250324;389191;711331;293673;268314;268310;171063	-	Probable histidine--tRNA ligase, mitochondrial OS=Homo sapiens GN=HARS2 PE=1 SV=1
6116_1	sp|P49327|FAS_HUMAN	512.31	0	273254	AAEQYTPK;AALQEELQLCK;ACLDTAVENMPSLK;ADEASELACPTPK;AFDTAGNGYCR;AFEVSENGNLVVSGK;AGLYGLPR;AINCATSGVVGLVNCLR;AMMANR;AQVADVVVSR;CLATHGR;CPPGVVPACHNSK;CTVFHGAQVEDAFR;CVLLSNLSSTSHVPEVDPGSAELQK;DGAWGAFR;DGLLENQTPEFFQDVCKPK;DGVVRPLK;DHRDNLEFFLAGIGR;DIMLATGK;DNLEFFLAGIGR;DPETLVGYSMVGCQR;DPSQQELPR;DTSFEQHVLWHTGGK;EAHLPPGAMAAVGLSWEECK;EDGLAQQQTQLNLR;EGGFLLLHTLLR;EQGVTFPSGDIQEQLIR;FCFTPHTEEGCLSER;FDASFFGVHPK;…	1;1;1;1;1;1;1;1;1;1;1;1;1;1;1;1;1;1;1;1;1;1;1;1;1;1;1;1;1;1;1;1;1;1;1;1;1;1;1;1;1;1;1;1;1;1;1;1;1;1;1;1;1;1;1;1;1;1;1;1;1;1;1;1;1;1;1;1;1;1;1;1;1;1;1;1;1;1;1;1;1;1;1;1;1;1;1;1;1;1;1;1;1;1;1;1;1;1;1;1;1;1;1;1	104	519	0.4875	88743;303869;443131;443132;443127;443708;443141;451249;353855;353860;262205;262204;262832;443817;443802;443791;443807;443777;443804;443762;443798;443830;443812;443836;443786;443782;443847;443815;443792;443840;443832;443806;443831;443781;443810;443825;60659;60660;60642;60643;60654;60631;60639;60637;569651;569661;569643;569668;569656;569641;569652;569613;569657;569647;569645;4851;4850;151724;151742…	-	Fatty acid synthase OS=Homo sapiens GN=FASN PE=1 SV=3
113_1	sp|P17213|BPI_HUMAN	10.8118	0.000204499	53865.1	GLDYASQQGTAALQK;VTNSVSSELQPYFQTLPVMTK	1;1	2	2	0.0739	444611;745324	-	Bactericidal permeability-increasing protein OS=Homo sapiens GN=BPI PE=1 SV=4
5826_1	sp|Q9UKV5|AMFR_HUMAN	7.54061	0.000765111	72948.8	FPWPSLR;LNQHNHFFHFDGSR	1;1	2	2	0.0327	86159;549176	-	E3 ubiquitin-protein ligase AMFR OS=Homo sapiens GN=AMFR PE=1 SV=2
7947_1	sp|Q96H79|ZCCHL_HUMAN	5.18295	0.00656644	32940.5	QGVHAAGAAEAGPLASVPAQSAK;VLCAHGGR	1;1	2	2	0.1033	670704;71235	-	Zinc finger CCCH-type antiviral protein 1-like OS=Homo sapiens GN=ZC3HAV1L PE=1 SV=2
6588_1	sp|Q9NSK7|CS012_HUMAN	11.3132	0.000204499	16275.5	GALVTGAMAFVGGLVGGPPGLAVGGAVGGLLGAWMTSGQFKPVPQILMELPPAEQQR;LFNEAAAIIR;LLCSLSGER	1;1;1	3	6	0.5	894273;193119;193133;193134;193122;148447	-	Protein C19orf12 OS=Homo sapiens GN=C19orf12 PE=1 SV=3
1475_1	sp|Q5T749|KPRP_HUMAN	6.5064	0.00224803	64093.2	LQLFPR;TSFSPCVPQCQTQGSYGSFTEQHR	1;1	2	3	0.0518	30380;30378;809211	-	Keratinocyte proline-rich protein OS=Homo sapiens GN=KPRP PE=1 SV=1
510_1	sp|Q9ULC4|MCTS1_HUMAN	40.4801	0	20541.8	EGPFYPTLR;ENVSNCIQLK;FVLSGANIMCPGLTSPGAK;GIGIENIHYLNDGLWHMK;LLHKYPFILPHQQVDK;MSAEDIEK;QHALCVGVMK;QREGPFYPTLR;YPFILPHQQVDK	1;1;1;1;1;1;1;1;1	9	28	0.5083	169771;169769;169763;248067;615708;615703;621464;621442;615706;615701;616116;621738;676629;676611;681270;681275;681251;635624;94972;209278;209300;209282;209280;339872;408620;408617;408622;408615	-	Malignant T-cell-amplified sequence 1 OS=Homo sapiens GN=MCTS1 PE=1 SV=1
8015_1	sp|Q9UKY1|ZHX1_HUMAN	20.0217	0.000204499	98037.2	FLNEQDLDELVNK;HETALVNPDSFGIR;TDIVSWFGDTR;VLQASFLNSSVLTDEELNR	1;1;1;1	4	7	0.0653	457650;446475;446496;447151;299932;683977;683457	-	Zinc fingers and homeoboxes protein 1 OS=Homo sapiens GN=ZHX1 PE=1 SV=1
2734_1	sp|P33316|DUT_HUMAN	32.1298	0	26546.6	AGGSPAPGPETPAISPSKR;ARPAEVGGMQLR;GNVGVVLFNFGK;HFIDVGAGVIDEDYR;IFYPEIEEVQALDDTER;TDIQIALPSGCYGR	1;1;1;1;1;1	6	10	0.3532	558000;302641;293213;302638;274437;524399;524349;664360;664357;444238	-	Deoxyuridine 5'-triphosphate nucleotidohydrolase, mitochondrial OS=Homo sapiens GN=DUT PE=1 SV=4
7183_1	sp|Q6NUN0|ACSM5_HUMAN	166.789	0	64719	AANVLGGACGLQPGDR;AFIVLTPAYSSHDPEALTR;ASPPYDVQIVDDEGNVLPPGEEGNVAVR;DGYFWFMGR;DPLAIYFTSGTTGAPK;EASTEHNCMR;ELQEHVKR;FPITTLCCVPTIFR;HCLTGGEALNPDVR;HQTGVELYEGYGQSETVVICANPK;IGPVEVESALAEHPAVLESAVVSSPDPIR;IGPVEVESALAEHPAVLESAVVSSPDPIRGEVVK;IVATWEAISLGR;KAANVLGGACGLQPGDR;KVAFVSELPK;LEEAGHRPPNPAFWWVNGTGAEIK;LLVQEDLTR;LLVSDSSRPGWLNFR;LPEWWLVSVACMR;MDKDGYFWFMGR;MMLVLPR;MVEHSQSSYGLGFVASGR;NDDVINSSSYR;SIITSDS…	1;1;1;1;1;1;1;1;1;1;1;1;1;1;1;1;1;1;1;1;1;1;1;1;1;1;1;1;1;1;1;1	32	169	0.6822	446426;446433;446424;670689;670699;670700;670692;670691;670714;670698;825820;825988;825824;825822;825990;825812;825816;825912;825821;825916;825920;825921;825924;825915;825989;232207;489436;489437;489429;489430;263970;149738;533875;533873;533869;533864;533868;438063;438065;438066;795013;829181;829185;865784;865783;865780;865785;865781;311760;311749;311753;311744;311750;311757;311755;311756;311768;…	-	Acyl-coenzyme A synthetase ACSM5, mitochondrial OS=Homo sapiens GN=ACSM5 PE=1 SV=2
1044_1	sp|P05981|HEPS_HUMAN	10.823	0.000204499	44982.5	EWIFQAIK;LPHTQR;VPIISNDVCNGADFYGNQIKPK	1;1;1	3	3	0.0863	148536;21700;756683	-	Serine protease hepsin OS=Homo sapiens GN=HPN PE=1 SV=1
3852_1	sp|Q96JG6|VPS50_HUMAN	22.1754	0.000204499	111104	EGFTQASLGLLANQR;KPIYWIVAGKALDYEQMLLLMANVK;LPPVLNLQELEAYR;QLLIGLLK;SNFSILQLHEFK;VADLILEK	1;1;1;1;1;1	6	6	0.0851	472384;826167;498669;83588;396491;84973	-	Syndetin OS=Homo sapiens GN=VPS50 PE=1 SV=3
3479_1	sp|P24534|EF1B_HUMAN	31.3837	0	24748.3	EKASLPGVK;LAQYESK;LAQYESKK;LVPVGYGIK;SIQADGLVWGSSK;SPAGLQVLNDYLADK;SSILLDVKPWDDETDMAK	1;1;1;1;1;1;1	7	17	0.32	97304;97295;56558;116352;105708;330246;330235;330240;471530;471529;471524;471523;471515;471500;471525;663219;663205	-	Elongation factor 1-beta OS=Homo sapiens GN=EEF1B2 PE=1 SV=3
5150_1	sp|Q9Y3E5|PTH2_HUMAN	33.1339	0	19181	APDEETLIALLAHAK;MLGLTVSLIQDAGR;QWEYCGQPK;THTDTESEASILGDSGEYK;TQIAPGSQTVLGIGPGPADLIDK;VAAQCSHAAVSAYK	1;1;1;1;1;1	6	14	0.5251	465385;465365;465386;411144;403359;242546;655517;713838;713837;714335;396294;396292;396957;396298	-	Peptidyl-tRNA hydrolase 2, mitochondrial OS=Homo sapiens GN=PTRH2 PE=1 SV=1
7556_1	sp|Q9NVS2|RT18A_HUMAN	12.7325	0.000204499	22169.8	ESPNPPNPSGQCPICR;KITGLCQEEHR;LPEGVVPK;MPVGSPLLR	1;1;1;1	4	5	0.2245	572058;343755;56682;117624;124947	-	39S ribosomal protein S18a, mitochondrial OS=Homo sapiens GN=MRPS18A PE=1 SV=1
2552_1	sp|Q9UHV9|PFD2_HUMAN	31.5636	0	16637.6	AAELEMELNEHSLVIDTLK;EVLPALENNK;EVLPALENNKEQIQK;GAVSAEQVIAGFNR;IIETLTQQLQAK;LMGEDEKPAAK;MVGGVLVER	1;1;1;1;1;1;1	7	17	0.5195	688477;199132;547644;371708;371715;371711;371695;371709;372090;352596;352591;352590;352592;238482;238490;112835;112850	-	Prefoldin subunit 2 OS=Homo sapiens GN=PFDN2 PE=1 SV=1
2740_2	sp|P00738|HPT_HUMAN	57.2468	0	45176.6	AVGDKLPECEADDGCPKPPEIAHGYVEHSVR;AVGDKLPECEAVCGKPK;DIAPTLTLYVGKK;FTDHLK;GSFPWQAK;HYEGSTVPEK;HYEGSTVPEKK;ILGGHLDAK;KQLVEIEK;LPECEAVCGKPK;LRTEGDGVYTLNDK;LRTEGDGVYTLNNEK;NPANPVQR;SCAVAEYGVYVK;SPVGVQPILNEHTFCAGMSK;TEGDGVYTLNDK;TEGDGVYTLNDKK;TEGDGVYTLNNEK;VGYVSGWGR;VMPICLPSK;VMPICLPSKDYAEVGR;VTSIQDWVQK;VVLHPNYSQVDIGLIK;YVMLPVADQDQCIR	1;0;0;1;0;1;1;0;0;0;0;1;0;0;1;0;0;1;1;0;1;1;1;1	12	45	0.5837	863396;591117;591114;591116;591104;371832;25562;94386;94376;94383;94375;94385;94384;211335;287198;95518;95522;125439;353292;459233;459239;459673;459229;525931;525999;526438;82712;82719;82721;82718;329028;329017;329045;329035;329022;329055;693420;693423;697972;697966;698233;697958;697974;693419;697978;697973;697964;309067;383139;383117;382991;382989;122604;122603;152163;152167;152166;582392;582373…	-	Haptoglobin OS=Homo sapiens GN=HP PE=1 SV=1
2740_1	sp|P00739|HPTR_HUMAN	14.3099	0.000204499	39004.7	AVGDKLPECEAVCGKPK;DIAPTLTLYVGKK;GSFPWQAK;ILGGHLDAK;KQLVEIEK;LPECEAVCGKPK;LRTEGDGVYTLNDK;NPANPVQR;SCAVAEYGVYVK;TEGDGVYTLNDK;TEGDGVYTLNDKK;VGYVSGWGQSDNFK;VMPICLPSK;VTSIQHWVQK;VVLHPNYHQVDIGLIK	0;0;0;0;0;0;0;0;0;0;0;1;0;1;1	3	6	0.3966	591117;591114;591116;591104;371832;94386;94376;94383;94375;94385;94384;95518;95522;125439;353292;459233;459239;459673;459229;82712;82719;82721;82718;329028;329017;329045;329035;329022;329055;309067;383139;383117;440569;152163;152167;152166;259576;586285;586281;586288;586694	-	Haptoglobin-related protein OS=Homo sapiens GN=HPR PE=2 SV=2
629_1	sp|P48723|HSP13_HUMAN	32.8399	0	51895.1	IFTAEELEAEIGR;ILVPIQQVLK;KLFDTLNEDLFQK;LFDTLNEDLFQK;LGGQDFNQR;QGGMFLTR;VINEPTAAAMAYGLHK	1;1;1;1;1;1;1	7	11	0.1465	404960;214986;214987;475223;408026;407615;407619;148350;89611;514531;514513	-	Heat shock 70 kDa protein 13 OS=Homo sapiens GN=HSPA13 PE=1 SV=1
3116_1	sp|A8MXV4|NUD19_HUMAN	19.329	0.000204499	42206.6	EAFEEAGVLLLRPR;LANFASLSDLHK;SADWLGLFAPHHGPPR;SPHQGFMPGAHVFSGGVLDAADR	1;1;1;1	4	6	0.1733	469979;311661;311676;549365;738863;738838	-	Nucleoside diphosphate-linked moiety X motif 19 OS=Homo sapiens GN=NUDT19 PE=1 SV=1
830_1	sp|Q8N4N3|KLH36_HUMAN	17.0771	0.000204499	69851.7	FDVLGVEAYSPQCNQWTR;FTYGHAGTIYK;NLLCYDHR;QVLENIHFPLIPK;TDSWSYVAGLPR	1;1;1;1;1	5	5	0.1006	692821;277674;176749;442874;332375	-	Kelch-like protein 36 OS=Homo sapiens GN=KLHL36 PE=1 SV=1
3471_1	sp|Q9Y3D6|FIS1_HUMAN	12.2323	0.000204499	16927	GLLQTEPQNNQAK;STQFEYAWCLVR	1;1	2	7	0.1645	383817;383812;383821;384345;448490;448482;448476	-	Mitochondrial fission 1 protein OS=Homo sapiens GN=FIS1 PE=1 SV=2
2872_2	sp|P50453|SPB9_HUMAN	34.994	0	42376.3	ADLSAMSAER;AFQSLLTEVNK;AQLLELPYAR;ELSFIR;GNTATQMAQALSLNTEEDIHR;HLGIVDAFQQGK;LAHVGEVR;LTAWTKPDCMK;LVLVNAIYFK;SLTFEK	1;1;1;1;1;1;1;1;0;1	9	17	0.2793	155210;273812;229510;229507;27128;27120;27127;726540;726785;726968;309751;310301;310317;77213;331945;331941;233271;233272;11440	-	Serpin B9 OS=Homo sapiens GN=SERPINB9 PE=1 SV=1
6828_1	sp|P61964|WDR5_HUMAN	43.3356	0	36565.5	DGSLIVSSSYDGLCR;FSPNGEWLASSSADK;FTLAGHTK;IWDVSSGK;IWGAYDGK;LGISDVAWSSDSNLLVSASDDK;LQGHTDVVISTACHPTENIIASAALENDK;TLIDDDNPPVSFVK;YILAATLDNTLK	1;1;1;1;1;1;1;1;1	9	13	0.3922	484012;484009;467341;467336;74172;74167;80834;89564;721621;839810;448666;448663;323937	-	WD repeat-containing protein 5 OS=Homo sapiens GN=WDR5 PE=1 SV=1
2872_1	sp|P30740|ILEU_HUMAN	13.4517	0.000204499	42714.7	FAYGYIEDLK;FQSLNADINKR;LGVQDLFNSSK;LVLVNAIYFK	1;1;1;0	3	3	0.1108	256345;305696;250119;233271;233272	-	Leukocyte elastase inhibitor OS=Homo sapiens GN=SERPINB1 PE=1 SV=1
26_1	sp|P49448|DHE4_HUMAN	25.9297	0.000204499	61395.4	AKPYEGSILEVDCDILIPAATEK;ALASLMTYK;AQHSQHR;CAVVDVPFGGAK;CIAVGESDGSIWNPDGIDPK;DDGSWEVIEGYR;DIVHSALAYTMER;DSNYHLLLSVQESLER;ELEDFKLQHGSILGFPK;FTMELAK;FTMELAKK;GFIGPGVDVPAPDMNTGER;HGGTIPIVPTAEFQDSISGASEK;IIAEGANGPTTPEADK;IIAEGANGPTTPEADKIFLER;IIKPCNHVLSLSFPIR;KGFIGPGVDVPAPDMNTGER;LQHGSILGFPK;MVEGFFDR;NLNHVSYGR;RDDGSWEVIEGYR;RFTMELAK;TAAYVNAIEK;TFVVQGFGNVGLHSMR;YNLGLDLR;YSTDVSVDEVK	1;0;0;0;0;0;1;1;0;0;0;1;1;0;0;0;1;0;0;0;0;0;0;0;0;0	6	7	0.5018	772277;131235;131238;131239;131237;138819;138818;131228;138815;68291;257023;257030;257022;682311;682315;682310;682327;682525;682322;682324;682528;682308;682323;375448;375444;375446;375440;375450;375445;375437;375449;375442;375447;419689;608649;629360;629373;629392;629381;629368;629362;629387;629364;629377;629367;629384;629372;629397;629376;629374;629366;629365;629403;629361;629389;56900;56904;569…	-	Glutamate dehydrogenase 2, mitochondrial OS=Homo sapiens GN=GLUD2 PE=1 SV=2
26_2	sp|P00367|DHE3_HUMAN	61.4056	0	61359.2	AKPYEGSILEADCDILIPAASEK;ALASLMTYK;AQHSQHR;CAVVDVPFGGAK;CIAVGESDGSIWNPDGIDPK;DDGSWEVIEGYR;DIVHSGLAYTMER;DSNYHLLMSVQESLER;DSNYHLLMSVQESLERK;ELEDFKLQHGSILGFPK;FTMELAK;FTMELAKK;GASIVEDKLVEDLR;GFIGPGIDVPAPDMSTGER;HGGTIPIVPTAEFQDR;IIAEGANGPTTPEADK;IIAEGANGPTTPEADKIFLER;IIKPCNHVLSLSFPIR;ISGASEKDIVHSGLAYTMER;KGFIGPGIDVPAPDMSTGER;LQHGSILGFPK;MVEGFFDR;NLNHVSYGR;NYTDNELEK;RDDGSWEVIEGYR;RFTMELAK;TAAYVNAIEK;T…	1;0;0;0;0;0;1;1;1;0;0;0;1;1;1;0;0;0;1;1;0;0;0;1;0;0;0;0;1;0;0	11	132	0.5627	764097;764098;764105;764103;764087;764085;764092;764089;764096;764095;764082;764083;764088;764107;764094;764091;131235;131238;131239;131237;138819;138818;131228;138815;68291;257023;257030;257022;682311;682315;682310;682327;682525;682322;682324;682528;682308;682323;375448;375444;375446;375440;375450;375445;375437;375449;375442;375447;411972;411980;411964;411936;411968;411977;411974;411938;411956;4…	-	Glutamate dehydrogenase 1, mitochondrial OS=Homo sapiens GN=GLUD1 PE=1 SV=2
1685_1	sp|P23219|PGH1_HUMAN	6.25184	0.00334572	68641.7	ILPSVPK;TCPYVSFR	1;1	2	3	0.025	22374;146182;146190	-	Prostaglandin G/H synthase 1 OS=Homo sapiens GN=PTGS1 PE=1 SV=2
6652_1	sp|Q86VS8|HOOK3_HUMAN	65.4036	0	83074.4	AEDSVLLK;AIIEDLEPR;ESPVSAGNDAYVDLDR;FNNSSLK;HLQLQTQLEQLQEETFR;IDPAYFDENWLNR;IKTEVGDNWR;LASTGSGQSFLAR;LEGQVESYKK;LLEVQSQVEELQK;LNQEGSDNEK;QNQGAAPEIQALK;SQLETYKR;SSLLAENQVLMER	1;1;1;1;1;1;1;1;1;1;1;1;1;1	14	17	0.2228	74211;158455;525180;43613;43611;684918;496814;255902;298849;298862;233682;440324;203778;342286;342238;143972;411015	-	Protein Hook homolog 3 OS=Homo sapiens GN=HOOK3 PE=1 SV=2
621_1	sp|Q8NBF6|AVL9_HUMAN	8.38038	0.00039093	71902.4	GFVAGATNILFR;IGNVMVTTSR	1;1	2	2	0.034	281998;168711	-	Late secretory pathway protein AVL9 homolog OS=Homo sapiens GN=AVL9 PE=1 SV=1
1222_1	sp|Q9HAT2|SIAE_HUMAN	15.4885	0.000204499	58277.1	DKQTVAYR;DSPFGSIHPR;IFEISCCSDHR;YAWTTWPCEYK	1;1;1;1	4	5	0.0765	122790;189918;189921;374381;419091	-	Sialate O-acetylesterase OS=Homo sapiens GN=SIAE PE=1 SV=1
2391_1	sp|Q9UBS8|RNF14_HUMAN	23.9432	0.000204499	53801.6	DYFEIQIR;ELVEAELFAR;HFNDPGSPCFNR;IYLDLPQNFK;LFLCSICFCEK;NEYLQADEANKR	1;1;1;1;1;1	6	7	0.1329	172019;231144;387669;274391;404223;389535;389552	-	E3 ubiquitin-protein ligase RNF14 OS=Homo sapiens GN=RNF14 PE=1 SV=1
8054_1	sp|Q9UJ68|MSRA_HUMAN	47.5106	0	26115.7	EGQTFYYAEDYHQQYLSK;GVYSTQVGFAGGYTSNPTYK;NPNGYCGLGGTGVSCPVGIK;NPNGYCGLGGTGVSCPVGIKK;QMEAALSSK;SAIYPTSAK;VFWENHDPTQGMR;VLSEHGFGPITTDIR;VVYQPEHMSFEELLK	1;1;1;1;1;1;1;1;1	9	16	0.5106	719013;719016;719326;672854;645288;645631;645295;683877;115204;101717;477641;477642;490925;587746;587744;587741	-	Mitochondrial peptide methionine sulfoxide reductase OS=Homo sapiens GN=MSRA PE=1 SV=1
6693_1	sp|O00193|SMAP_HUMAN	8.88132	0.00039093	20320.2	SASPDDDLGSSNWEAADLGNEER;STSHFR	1;1	2	2	0.1585	754403;15808	-	Small acidic protein OS=Homo sapiens GN=SMAP PE=1 SV=1
3431_1	sp|Q06265|EXOS9_HUMAN	16.3675	0.000204499	48918.1	FGFAESIANQR;ISFGTDYGCCIVELGK;VAEITELILK	1;1;1	3	4	0.0843	267211;575811;200924;200927	-	Exosome complex component RRP45 OS=Homo sapiens GN=EXOSC9 PE=1 SV=3
1854_1	sp|Q06033|ITIH3_HUMAN	30.252	0	99786.5	EVSFDVELPK;FAHNVVTMR;GISMLNK;LIQDAVTGLTVNGQITGDKR;NHQLIVTR;SLPEGVANGIEVYSTK;VSDIRPGSDPTKPDATLVVK	1;1;1;1;1;1;1	7	15	0.1011	221971;221979;167061;167059;26338;673762;673761;674125;122905;502795;503255;502702;503300;502808;672512	-	Inter-alpha-trypsin inhibitor heavy chain H3 OS=Homo sapiens GN=ITIH3 PE=1 SV=2
29_1	sp|P49006|MRP_HUMAN	11.7349	0.000204499	19517.2	AAATPESQEPQAK;GDVTAEEAAGASPAK;LSGLSFK	1;1;1	3	3	0.1795	319251;345182;21731	-	MARCKS-related protein OS=Homo sapiens GN=MARCKSL1 PE=1 SV=2
7897_1	sp|Q6PI48|SYDM_HUMAN	127.826	0	73516.1	ACSLLGK;AICIPEGAK;DFDGLVQVIIPQDESAASVK;DFDGLVQVIIPQDESAASVKK;DVIAFPK;EENPRELESAHHPFTAPHPSDIHLLYTEPK;EFLVPSREPGK;ELESAHHPFTAPHPSDIHLLYTEPK;FYSLPQSPQQFK;IHNAELQR;IIDISDVFR;ILCEAPVESVVQVSGTVISRPAGQENPK;IPEFSSFVVR;KILCEAPVESVVQVSGTVISRPAGQENPK;KLPFEIK;LMETQEEDVVLLTAGEHNK;LPFEIK;LRLECADLLETR;NFAADHFNQEILPVFLNANR;NTEIGFLQDALSKPHGTVK;NWNSPVANFIMESQR;QNTFLVLR;RIPEFSSFVVR;SQHYDLVLNGNEIGGGSIR;SSHLGQEVTLCGW…	1;1;1;1;1;1;1;1;1;1;1;1;1;1;1;1;1;1;1;1;1;1;1;1;1;1;1;1	28	57	0.4806	20652;112015;112020;112001;682618;682616;682610;682808;682839;716552;716555;716836;35943;866193;278315;818336;818337;400305;400314;122805;168780;168782;168751;828835;828838;828837;233775;838931;838864;74319;688721;693413;19863;410547;410516;733604;660373;660378;660376;660591;564895;564886;564887;127306;127305;128593;324403;652344;652347;653941;141803;100592;100593;100591;364388;364390;364387	-	Aspartate--tRNA ligase, mitochondrial OS=Homo sapiens GN=DARS2 PE=1 SV=1
4411_1	sp|O94855|SC24D_HUMAN	127.855	0	112936	AVLHQPLK;CTTYCFPCTSDMAK;EILVNQTAHMLACYR;GGQVYATNTR;GQIPPLVTTDCMIQDQGNASPR;IGFDAIMR;IHNLGLNCSSQLADLYK;ILFQPQTNVYDSLAK;IPKEEQEETSAIR;KIGFDAIMR;KLDPDSIPSPIQVIENDR;KLVNTDK;KNCASPSAASQLILPDSMK;LDHYEKPELSLGSYEYVATLDYCR;LDPDSIPSPIQVIENDR;LFIFHSSLPTAEAPGK;LICEELK;LSEDSGALIQCAVLYTTISGQR;MIMGIIQQK;NCASPSAASQLILPDSMK;NCVLLSRPEISTDER;QQFLNDLR;QREQPEMVFR;STMLPAAVR;VGFITYNK;VLHFFNVK;VLPVYMNCLLK;YNNFQMHLDR;YQCG…	1;1;1;1;1;1;1;1;1;1;1;1;1;1;1;1;1;1;1;1;1;1;1;1;1;1;1;1;1	29	67	0.3382	88125;88126;88128;541885;541883;576222;163941;747790;748018;748274;95135;95131;102028;624893;625419;625775;625394;540037;540046;540041;540025;540402;432964;155551;654658;654664;654662;654668;654652;654656;654855;654851;654663;47245;649044;649033;824248;610778;610809;610755;610757;610814;610820;610793;529191;529177;529179;529187;87140;744781;161706;161721;603676;603665;563093;563085;148138;148148;…	-	Protein transport protein Sec24D OS=Homo sapiens GN=SEC24D PE=1 SV=2
7876_1	sp|Q9H3G5|CPVL_HUMAN	39.4052	0	54129.1	AFDMINR;ELSLVGPFPGLNMK;FLSLPEVR;GGGHILPYDQPLR;NNDFYVTGESYAGK;QAGDFHQVIIR;QCHECIEHIR;QCHECIEHIRK;SDSEVAGYIR;SLMGMDWK	1;1;1;1;1;1;1;1;1;1	10	22	0.2017	77776;77769;70163;70166;70160;417588;113493;113490;113498;113489;113499;374198;450811;450810;292680;292673;293525;349923;422300;180516;180519;116592	-	Probable serine carboxypeptidase CPVL OS=Homo sapiens GN=CPVL PE=1 SV=2
2053_1	sp|P17568|NDUB7_HUMAN	17.4473	0.000204499	16391.3	DSFPNFLACK;DYCAHHLIR;EMVATQQEMMDAQLR;EREMVATQQEMMDAQLR;GQGPGEVDPK	1;1;1;1;1	5	5	0.3358	244442;236068;559381;668947;123883	-	NADH dehydrogenase [ubiquinone] 1 beta subcomplex subunit 7 OS=Homo sapiens GN=NDUFB7 PE=1 SV=4
6395_1	sp|P50579|MAP2_HUMAN	36.5477	0	52858.1	ALDQASEEIWNDFR;IDFGTHISGR;MEEGEVYAIETFGSTGK;NFDVGHVPIR;NLCDLGIVDPYPPLCDIK;NLNGHSIGQYR;VQTDPPSVPICDLYPNGVFPK;YLMALK	1;1;1;1;1;1;1;1	8	15	0.2238	518070;183973;183958;183974;587163;216627;674617;278152;278177;278175;278156;736386;736392;17167;17164	-	Methionine aminopeptidase 2 OS=Homo sapiens GN=METAP2 PE=1 SV=1
1378_1	sp|O75886|STAM2_HUMAN	19.2248	0.000204499	58127.7	AIELSLQEQK;HSELSELNVK;IFHLEVCSR;LVNEAPVYSVYSK;PLFTANPFEQDVEK;VLEALELYNK	1;0;0;1;1;1	4	4	0.1257	219616;217568;220636;399825;487127;240453	-	Signal transducing adapter molecule 2 OS=Homo sapiens GN=STAM2 PE=1 SV=1
4419_1	sp|Q8WV74|NUDT8_HUMAN	28.6974	0	25354.3	CDPADQDVVHTALR;GVPALLYTLR;HKGDVSFPGGK;LAGLTCSGAEGLARPK;MLPDCLSAEGELR;YTLPVFLHGPHR	1;1;1;1;1;1	6	8	0.322	467845;184317;184316;200325;200276;470354;411384;381633	-	Nucleoside diphosphate-linked moiety X motif 8 OS=Homo sapiens GN=NUDT8 PE=1 SV=2
153_1	sp|O95352|ATG7_HUMAN	72.9618	0	77909.3	CCPAIGTLYNTNTLESFK;DVAHSIIFEVK;EGFNFLAK;FDNVLPVSLAFDK;GFNMSIPMPGHPVNFSSVTLEQAR;GYYYNGDSAGLPAR;HITFVDNAK;LGCYFCNDVVAPGDSTR;LPEMAFSPDCPK;LTLEFSAFDMSAPTPAR;MNEPPTSLGLVPHQIR;NFLVLAAHR;QPLYEFEDCLGGGKPK;RLAESSVDLNLK;TLMGWGVR	1;1;1;1;1;1;1;1;1;1;1;1;1;1;1	15	23	0.2902	670824;671097;671103;277801;96006;397666;786601;418463;418457;418478;419110;152159;152122;619453;619457;365113;589440;563173;150473;583560;328780;328778;94134	-	Ubiquitin-like modifier-activating enzyme ATG7 OS=Homo sapiens GN=ATG7 PE=1 SV=1
6474_1	sp|Q9H2X3|CLC4M_HUMAN	47.6804	0	45321.8	AAVGELPDQSK;AAVGELPEK;DFQFQQIHGHK;LQEIYQELTELK;LQEIYQELTQLK;LQEIYQELTR;SKLQEIYQELTR;TAEEQNFLQLQTSR;VQQLGLLEEDPTTSGIR	1;1;1;1;1;1;1;1;1	9	22	0.2456	191050;91586;351876;351867;420358;420354;420355;419946;419952;419940;420958;297869;297859;297863;420964;420970;420968;503226;503222;504038;590443;590821	-	C-type lectin domain family 4 member M OS=Homo sapiens GN=CLEC4M PE=1 SV=1
6264_1	sp|Q02878|RL6_HUMAN	87.5244	0	32707.6	AIPQLQGYLR;AVDSQILPK;EKVLATVTKPVGGDK;EKYEITEQR;FVIATSTK;HLTDAYFK;HQEGEIFDTEK;HQEGEIFDTEKEK;IDISNVK;IDISNVKIPK;QLASGLLLVTGPLVLNR;SAMYSR;SVFALTNGIYPHK;VLATVTKPVGGDK;VLATVTKPVGGDKNGGTR;YEITEQR;YEITEQRK;YYPTEDVPR;YYPTEDVPRK	1;1;1;1;1;1;1;1;1;1;1;1;1;1;1;1;1;1;1	19	147	0.4583	219802;219812;219805;219800;219794;219808;219799;220304;219797;219807;219798;219793;118009;118011;118024;118041;439908;439911;439909;242713;70393;70388;70385;70400;70396;70378;70402;70399;70405;70391;129348;129392;129358;129423;129330;129360;129297;129370;129343;129323;129325;129324;129391;129321;129319;129362;129389;129338;129377;129369;129350;321930;321938;321927;321931;321936;321926;321923;321…	-	60S ribosomal protein L6 OS=Homo sapiens GN=RPL6 PE=1 SV=3
8213_1	sp|Q8N4S9|MALD2_HUMAN	5.68738	0.00453278	64127.2	ELSAEVQAVLR;KFDELDAVMSR	1;1	2	2	0.0394	255021;308466	-	MARVEL domain-containing protein 2 OS=Homo sapiens GN=MARVELD2 PE=1 SV=2
4837_1	sp|Q53EP0|FND3B_HUMAN	29.0594	0	132803	ACCISTGGHSQCSESLPVR;GPVTSHGFSVK;IQAINEIGAGPFSQFIK;ITNYLLEWDEGKR;LECAAAGPQSLK;QVYKGEEATFQISGLQTNTDYR;VQDILSGIEKPQVSNIQAR;VYAMYNSVK	1;1;1;1;1;1;1;1	8	10	0.1013	675661;191616;581408;488163;270555;775225;775354;672728;672517;176778	-	Fibronectin type III domain-containing protein 3B OS=Homo sapiens GN=FNDC3B PE=1 SV=2
2250_1	sp|Q16851|UGPA_HUMAN	206.915	0	56904.7	ADVKGGTLTQYEGK;AHVDEFK;AHVDEFKSVSK;AMSQDGASQFQEVIR;ARGLPDNISSVLNK;CEFVMEVTNK;EFPTVPLVK;ESLLPVAK;FVQDLSK;FVQDLSKAMSQDGASQFQEVIR;GGTLTQYEGK;GLPDNISSVLNK;GPSVDWGK;GTVIIIANHGDR;GTVIIIANHGDRIDIPPGAVLENK;IDIPPGAVLENK;IFNTNNLWISLAAVK;ILTTASSHEFEHTK;ILTTASSHEFEHTKK;INKESLLPVAK;IQRPPEDSIQPYEK;IVSGNLR;IYTFNQSR;LGSSFTK;LNGGLGTSMGCK;LQEQNAIDMEIIVNAK;LRLVEIAQVPK;LVEIAQVPK;NENTFLDLTVQQIEHLNK;QELELSVK;QELELSVKK…	1;1;1;1;1;1;1;1;1;1;1;1;1;1;1;1;1;1;1;1;1;1;1;1;1;1;1;1;1;1;1;1;1;1;1;1;1;1;1;1;1	41	1046	0.685	398703;59764;59758;59781;59760;271827;504047;504049;512778;504000;504046;512788;504042;504034;504021;504029;504011;504036;513266;504028;512775;512776;505144;504035;504454;504534;512789;504489;504463;512784;512760;504026;504037;504539;504039;505162;513257;504588;504442;504030;513315;504070;505157;512765;504052;504033;504005;504550;504527;504538;504018;504023;408162;277153;277156;285819;277149;2771…	-	UTP--glucose-1-phosphate uridylyltransferase OS=Homo sapiens GN=UGP2 PE=1 SV=5
7596_1	sp|Q9H9J2|RM44_HUMAN	27.2307	0.000204499	37511.7	DFLITQMTGK;EAVLLNLK;ELFEMWK;LIAEGPGETVLVAEEEAAR;LYGFTENR;NLVDFLTGEEVVCHVAR;SEKPNWDYHAEIQAFGHR	1;1;1;1;1;1;1	7	11	0.262	216531;226340;84493;123454;627656;627667;132059;629249;696916;696915;696931	-	39S ribosomal protein L44, mitochondrial OS=Homo sapiens GN=MRPL44 PE=1 SV=1
786_1	sp|O95716|RAB3D_HUMAN	8.90636	0.00039093	24251.8	CDLEDER;TITTAYYR;TSFLFR;TYSWDNAQVILVGNK	0;0;1;1	2	2	0.1644	101104;126106;126104;29029;525500	-	Ras-related protein Rab-3D OS=Homo sapiens GN=RAB3D PE=1 SV=1
1853_1	sp|O95613|PCNT_HUMAN	9.61583	0.000204499	377806	LLGLFGETLR;QQMSSLLLASTLQSTLDAGRCPEPPSGSPPEGPEIQLEVTQR;VPGAHPQPR	1;1;1	3	3	0.0183	193913;889483;112083	-	Pericentrin OS=Homo sapiens GN=PCNT PE=1 SV=4
786_3	sp|P61026|RAB10_HUMAN	20.8944	0.000204499	22526.6	FFETSAK;KTYDLLFK;NIDEHANEDVER;TPVKEPNSENVDISSGGGVTGWK;TVELQGK;TVELQGKK	0;1;1;1;1;1	5	11	0.29	51960;51964;51957;145486;383612;383615;739839;739836;740005;739827;739821;740002;30650;86329	-	Ras-related protein Rab-10 OS=Homo sapiens GN=RAB10 PE=1 SV=1
786_2	sp|P51153|RAB13_HUMAN	20.7831	0.000204499	22759.7	ENASAGVER;FAEDNFNNTYISTIGIDFK;FFETSAK;LQVWDTAGQER;SSMNVDEAFSSLAR;TITTAYYR	1;1;0;1;1;0	4	12	0.335	99183;99759;703409;703422;51960;51964;51957;303805;303804;303808;423862;432394;432406;432380;424411;126106;126104	-	Ras-related protein Rab-13 OS=Homo sapiens GN=RAB13 PE=1 SV=1
786_5	sp|P61006|RAB8A_HUMAN	26.5252	0.000204499	23653.2	ANINVENAFFTLAR;GAMGIMLVYDITNEK;KLEGNSPQGSNQGVK;LEGNSPQGSNQGVK;NIEEHASADVEK;SFDNIR;TIELDGK;TITTAYYR	1;0;1;1;1;1;0;0	5	14	0.372	458668;458669;458681;458673;459314;458692;506571;506568;440202;440203;369320;369314;326697;326709;326706;21527;30898;126106;126104	-	Ras-related protein Rab-8A OS=Homo sapiens GN=RAB8A PE=1 SV=1
786_4	sp|A6NIZ1|RP1BL_HUMAN	18.3485	0.000204499	20911.6	CDLEDER;EQGQNLAR;EQVEVDAQQCMLEILDTAGTEQFTAMR;QWNNCAFLESSAK;SALTVQFVQGIFVEK;VKDTDDVPMILVGNK;YDPTIEDSYR	0;0;1;1;0;1;0	3	9	0.5163	101104;92472;842604;843829;842538;445802;446265;503821;503818;503819;491861;500720;500721;491866;278065	-	Ras-related protein Rap-1b-like protein OS=Homo sapiens PE=2 SV=1
786_7	sp|Q92930|RAB8B_HUMAN	22.1247	0.000204499	23569.1	FLETSAK;GAMGIMLVYDITNEK;KMNDSNSAGAGGPVK;LAIDYGIK;NIEEHASSDVER;SSANVEEAFFTLAR;TCLLFR;TIELDGK;TITTAYYR	1;0;1;1;1;1;1;0;0	6	14	0.4444	38034;506571;506568;379673;81356;81366;81372;352700;439672;439665;439683;439666;439668;43646;43652;43649;30898;126106;126104	-	Ras-related protein Rab-8B OS=Homo sapiens GN=RAB8B PE=1 SV=2
786_6	sp|P62834|RAP1A_HUMAN	22.4546	0.000204499	20973.7	CDLEDER;EQGQNLAR;LVVLGSGGVGK;QWCNCAFLESSAK;SALTVQFVQGIFVEK;VKDTEDVPMILVGNK;YDPTIEDSYR;YDPTIEDSYRK	0;0;1;1;0;1;0;1	4	19	0.4348	101104;92472;125087;125096;125094;125074;125077;470062;470061;470447;503821;503818;503819;499477;499442;499452;499436;508323;499457;500206;278065;352743;352738;352736;352731	-	Ras-related protein Rap-1A OS=Homo sapiens GN=RAP1A PE=1 SV=1
786_9	sp|P62820|RAB1A_HUMAN	29.5462	0	22663.4	EFADSLGIPFLETSAK;FADDTYTESYISTIGVDFK;GAHGIIVVYDVTDQESFNNVK;IQSTPVK;KVVDYTTAK;MGPGATAGGAEK;NATNVEQSFMTMAAEIK;SCLLLR;TIELDGK;TITSSYYR;VVDYTTAK;YASENVNK	0;0;1;1;1;1;1;0;0;0;1;0	6	29	0.6341	533848;533851;533850;533847;533854;533858;533844;533853;533852;533840;533841;533856;533857;533843;693380;693381;693383;727542;727564;727551;727560;727570;727812;727540;727575;727804;727558;727572;29888;29886;29883;144031;144030;144029;152964;152965;607631;607636;601896;601895;601898;608122;607623;608118;26016;26013;26006;26014;30898;127033;127029;127025;127032;127024;83154;83151;95674	-	Ras-related protein Rab-1A OS=Homo sapiens GN=RAB1A PE=1 SV=3
786_8	sp|Q9H0U4|RAB1B_HUMAN	20.8261	0.000204499	22157.2	EFADSLGIPFLETSAK;FADDTYTESYISTIGVDFK;GAHGIIVVYDVTDQESYANVK;KVVDNTTAK;MGPGAASGGERPNLK;NPEYDYLFK;SCLLLR;SDLTTKK;TIELDGK;TITSSYYR;YASENVNK	0;0;1;1;1;1;0;1;0;0;0	5	33	0.6169	533848;533851;533850;533847;533854;533858;533844;533853;533852;533840;533841;533856;533857;533843;693380;693381;693383;721255;721261;721248;721262;721258;721249;721243;721263;721448;721259;721223;721252;721254;721431;721264;721447;721669;721253;721459;721251;120373;384241;384250;384247;393353;384228;384239;393892;393340;384266;393355;238461;26016;26013;26006;26014;37100;30898;127033;127029;127025…	-	Ras-related protein Rab-1B OS=Homo sapiens GN=RAB1B PE=1 SV=1
5207_1	sp|Q01469|FABP5_HUMAN	9.08266	0.00039093	15154.6	LVVECVMNNVTCTR;TTQFSCTLGEK	1;1	2	2	0.1852	518726;285316	-	Fatty acid-binding protein, epidermal OS=Homo sapiens GN=FABP5 PE=1 SV=3
1994_1	sp|Q9BZ67|FRMD8_HUMAN	14.34	0.000204499	51186.2	AGPGEQGLLNAYR;FTSAPDDDVAMDEPFLQFR;NVFFPK	1;1;1	3	3	0.0819	329144;701082;21684	-	FERM domain-containing protein 8 OS=Homo sapiens GN=FRMD8 PE=1 SV=1
4867_1	sp|Q10472|GALT1_HUMAN	8.33909	0.00039093	64177.4	ATPYTFPGGTGQIINK;LNGPVTMLK	1;1	2	3	0.0447	503302;118932;126223	-	Polypeptide N-acetylgalactosaminyltransferase 1 OS=Homo sapiens GN=GALNT1 PE=1 SV=1
7206_1	sp|P49790|NU153_HUMAN	99.1332	0	153843	AGSSWQCDTCLLQNK;CLACESAKPGTK;CVACETPKPGTCVK;EGSVLDILK;FGVSSSSSGPSQTLTSTGNFK;FKPVIGTWDCDTCLVQNKPEAIK;GFDTSSSSSNSAASSSFK;IGVSSDSGSINPMSEGFK;ILQSLEK;NIVPGWLQR;NTPYQAPVR;NVFSSSGTSFSGR;QLSAQSYGVTSSTAR;RPIGSWECSVCCVSNNAEDNK;SPGFASPK;SSFNLGTIETK;STFSFSMTKPSEK;SVYFKPSLTPSGEFR;TSQLGDSPFYPGK;TTLSASGTGFGDK;TTYGGAAAAVR	1;1;1;1;1;1;1;1;1;1;1;1;1;1;1;1;1;1;1;1;1	21	31	0.1953	553872;315211;472638;472636;119422;119415;667113;667084;667105;799621;799726;547797;572943;53047;171740;152603;152597;321951;447134;762594;36149;36150;243372;243379;404275;529108;358522;358524;268354;149439;149447	-	Nuclear pore complex protein Nup153 OS=Homo sapiens GN=NUP153 PE=1 SV=2
981_1	sp|Q8IV45|UN5CL_HUMAN	5.50968	0.00521195	57780.8	LDCASAIQNYLSGTHGGSPGPER;TYSSNTTLLDAK	1;1	2	3	0.0676	745847;746006;310073	-	UNC5C-like protein OS=Homo sapiens GN=UNC5CL PE=1 SV=2
6063_1	sp|Q96FQ6|S10AG_HUMAN	25.7266	0.000204499	11794	AADKLIQNLDANHDGR;AVIVLVENFYK;ELNHMLSDTGNR;ELNHMLSDTGNRK;LIQNLDANHDGR	1;1;1;1;1	5	15	0.3883	546268;299111;299109;299110;299099;353253;424494;424504;424490;433326;425084;424479;340845;341519;340827	-	Protein S100-A16 OS=Homo sapiens GN=S100A16 PE=1 SV=1
6921_1	sp|Q96C01|F136A_HUMAN	46.6859	0	15630.7	AKDSIDAGSK;CHVPLAQAQALVTSELEK;CVDDHMHLIPTMTK;DSIDAGSK;EALLSIGK;MKEALLSIGK;MQGLMFR;QQLDSCVTK;QVHQCIER;VQEAVESMVK	1;1;1;1;1;1;1;1;1;1	10	53	0.6232	127959;641389;641373;641372;641391;641386;641375;641392;641382;641374;641385;641383;641376;641411;641395;641388;641393;641387;641390;641380;641366;641916;641352;641361;520121;520109;520172;520091;36981;53036;53032;53058;53050;53031;186170;186155;176548;176550;77816;77814;77813;83649;83642;77809;83650;83648;168945;165133;165132;165136;194179;194172;205396	-	Protein FAM136A OS=Homo sapiens GN=FAM136A PE=1 SV=1
6866_1	sp|Q86WR0|CCD25_HUMAN	19.521	0.000204499	24463.1	EVLMDCAHLVK;KVNEILNR;LSSAHVYLR;TADMDVGQIGFHR	1;1;1;1	4	9	0.1971	310670;310671;125047;152785;387208;387207;387224;387773;387770	-	Coiled-coil domain-containing protein 25 OS=Homo sapiens GN=CCDC25 PE=1 SV=2
4710_1	sp|P19784|CSK22_HUMAN	87.0297	0	41187.1	DVKPHNVMIDHQQK;EAMEHPYFYPVVK;EPFFHGQDNYDQLVR;EYWDYEAHVPSWGNQDDYQLVR;GKYSEVFEAINITNNER;HLVSPEALDLLDK;LIDTVKDPVSK;LIDWGLAEFYHPAQEYNVR;PGPAAGSR;REPFFHGQDNYDQLVR;TPALVFEYINNTDFK;VLGTEELYGYLK;VLGTEELYGYLKK;VYAEVNSLR;YHIDLDPHFNDILGQHSR;YSEVFEAINITNNER	1;1;1;1;1;1;1;1;1;1;1;1;1;1;1;1	16	50	0.5371	516075;516070;516071;524006;524023;474190;474185;474187;593831;593839;806556;806562;806437;637913;389267;389278;389268;389254;389260;389263;389257;254497;254499;254494;731208;6122;6123;649830;649822;649824;649825;555690;555684;352037;352048;423685;423683;155460;694716;694722;694721;694947;694712;694717;694714;694710;567473;567475;567485;567483	-	Casein kinase II subunit alpha' OS=Homo sapiens GN=CSNK2A2 PE=1 SV=1
2218_1	sp|P0CG08|GPHRB_HUMAN	6.11616	0.00351617	52881.9	QLFLETADLYATK	1	1	1	0.0286	423632	sp|B7ZAQ6|GPHRA_HUMAN	Golgi pH regulator B OS=Homo sapiens GN=GPR89B PE=1 SV=1
2886_1	sp|Q6P587|FAHD1_HUMAN	24.0187	0.000204499	24826.7	FWEWGK;GLPWTLAK;IITLEEGDIILTGTPK;NLHHELELGVVMGK;SFTASCPVSAFVPK	1;1;1;1;1	5	15	0.2589	63296;63295;79034;79036;527842;527837;527835;527833;527832;527838;527824;527840;456686;456708;415145	-	Acylpyruvase FAHD1, mitochondrial OS=Homo sapiens GN=FAHD1 PE=1 SV=2
2070_1	sp|Q9H999|PANK3_HUMAN	10.2513	0.000204499	41067.9	ATLVTITNNIGSVAR;DIYGGDYER;FPTQDLPTFIQMGR;VVFVGNFLR;YLTSNVAYGSTGIR	1;0;1;0;0	2	3	0.1649	433137;174379;495571;495558;155660;155666;155662;417442	-	Pantothenate kinase 3 OS=Homo sapiens GN=PANK3 PE=1 SV=1
2070_2	sp|Q9BZ23|PANK2_HUMAN	39.3023	0	62641.2	ASATSVSSAGEQAAGDPEGR;ATLITITNNIGSIAR;DITAEEEEEEVESLK;DIYGGDYER;FPTHDMPAFIQMGR;GILYIDSVGFNGR;LGSYSGPTSVSR;LPFDLK;LVYFEPK;YLTSNVAYGSTGIR	1;1;1;0;1;1;1;1;0;0	7	8	0.2193	587170;447867;545625;174379;493748;367208;251833;251835;15338;82736;417442	-	Pantothenate kinase 2, mitochondrial OS=Homo sapiens GN=PANK2 PE=1 SV=3
2070_3	sp|Q8TE04|PANK1_HUMAN	47.3582	0	64298.1	ATLVTITNNIGSIAR;DITAEEEQEEVENLK;DIYGGDYER;FEEDFR;FGLQGSAVASSFGNMMSK;FIQMGSEK;GPVGGSDAAPQR;LPLLPELQPQPLLPQHDSPAK;LVYFEPK;MIADLQLHK;NFSSLHTTLCATGGGAFK;VVFVGNFLR;YLTSNTAYGK	1;1;0;1;1;1;1;1;0;1;1;0;1	10	14	0.2625	440939;440934;557202;557206;174379;58053;576080;102314;102319;189422;733655;82736;164794;164792;595956;155660;155666;155662;192694	-	Pantothenate kinase 1 OS=Homo sapiens GN=PANK1 PE=1 SV=2
5445_1	sp|Q8IV38|ANKY2_HUMAN	30.4012	0	49266.7	GTVQEAGTLLSSK;IITTTNLHPVK;LAGPLHK;LDYYTKPQGLDK;LDYYTKPQGLDKEPK;MVIYCDQTCQK;VNCLDENGMTPLMHAAYK	1;1;1;1;1;1;1	7	10	0.1701	296623;265831;265830;265833;16436;383796;565933;386430;663412;663406	-	Ankyrin repeat and MYND domain-containing protein 2 OS=Homo sapiens GN=ANKMY2 PE=1 SV=1
1813_1	sp|Q8NBJ7|SUMF2_HUMAN	47.369	0	33821.8	EATVKPFAIDIFPVTNK;ERLEHPVLHVSWNDAR;FLMGTNSPDSR;LEHPVLHVSWNDAR;LPTEEEWEFAAR;MGNTPDSASDNLGFR;QPAGPGSGIR;RLPTEEEWEFAAR;SVLWWLPVEK;TNLWQGK	1;1;1;1;1;1;1;1;1;1	10	22	0.3289	603827;603830;603831;603829;629296;629298;629305;267762;267767;507778;507788;404765;468293;468296;459469;459973;102396;102393;102394;486551;277457;60480	-	Sulfatase-modifying factor 2 OS=Homo sapiens GN=SUMF2 PE=1 SV=2
1894_1	sp|Q9UID3|VPS51_HUMAN	15.7783	0.000204499	85988.2	FISATDTIR;IDVFSPVEFNK;LATNMAVITDFSAR	1;1;1	3	3	0.0435	143559;298848;421917	-	Vacuolar protein sorting-associated protein 51 homolog OS=Homo sapiens GN=VPS51 PE=1 SV=2
7418_1	sp|O15091|MRRP3_HUMAN	13.2736	0.000204499	67272.5	AFFDFGK;EALLLLEDIKK;SRPPFDVVIDGLNVAK	1;1;1	3	5	0.0583	53239;293352;535006;534993;535003	-	Mitochondrial ribonuclease P protein 3 OS=Homo sapiens GN=KIAA0391 PE=1 SV=2
494_1	sp|P02792|FRIL_HUMAN	60.5696	0	20007.1	AAMALEK;AAMALEKK;ALFQDIK;DDVALEGVSHFFR;ELAEEKR;KLNQALLDLHALGSAR;KMGDHLTNLHR;KPAEDEWGKTPDAMK;LGGPEAGLGEYLFER;LNQALLDLHALGSAR;MGDHLTNLHR;TDPHLCDFLETHFLDEEVK	1;1;1;1;1;1;1;1;1;1;1;1	12	119	0.6286	15551;67804;54961;54941;54946;54944;54949;54936;54968;54950;411943;411971;411962;411922;411927;74127;74126;531841;531829;531820;531821;531824;531826;531832;531839;531823;531843;531822;531838;531836;531837;531819;531830;531840;531833;531825;531831;532265;315409;324711;315461;324718;315415;522922;531083;522920;522911;522906;531071;522916;531074;522910;473251;473246;473227;473229;473236;473237;47324…	-	Ferritin light chain OS=Homo sapiens GN=FTL PE=1 SV=2
3838_1	sp|Q969Y2|GTPB3_HUMAN	40.0019	0	52026.2	DLALAAEALR;EGVGPVEQEGVR;GWAETLTK;KPVSIVSPEPGTTR;LLLVLNK;LLSDPR;SGVHVVVTGPPNAGK;SSGAPAPGSGATIFALSSGQGR;TSGPASGHALR	1;1;1;1;1;1;1;1;1	9	16	0.2134	151241;276784;87694;399356;399369;45008;45006;810;371777;635479;635480;635461;157187;157184;157180;157179	-	tRNA modification GTPase GTPBP3, mitochondrial OS=Homo sapiens GN=GTPBP3 PE=1 SV=2
5704_1	sp|Q86TX2|ACOT1_HUMAN	90.0363	0	46248.1	AATLILEPAGR;ADTLGELDLER;AESTFLFLVGQDDHNWK;AHAMAQVDAWK;ASLHALVGSPIIWGGEPR;DGYADIVDVLNSPLEGPDQK;GALFQAHAR;GGELCLSMASFLK;GLAPEQPVTLR;GPGVGLLGISK;HLGGHEGTIPSK;HLGGHEGTIPSKV;QLQTFFHK;SEFYANEACKR;TPLAVELEVLDGHDPDPGR;YFLPPGVR;YKGETLPPVGVNR;YRADTLGELDLER	1;1;1;1;1;1;1;1;1;1;1;1;1;1;1;1;1;1	18	79	0.4893	189674;189689;262373;262369;645316;645317;645315;260283;260294;260291;260284;269742;260285;260289;260288;260293;260286;269744;269736;591997;591996;591993;591990;591989;591992;591942;686098;686096;686328;686086;686105;686088;686094;686093;686339;117939;376991;233853;233854;233856;233813;131431;131425;131426;131441;131420;131422;131418;131449;263035;263070;321701;321695;321708;154371;154384;154870;…	-	Acyl-coenzyme A thioesterase 1 OS=Homo sapiens GN=ACOT1 PE=1 SV=1
989_2	sp|Q9NZJ9|NUDT4_HUMAN	25.2158	0.000204499	20293.2	AACLCFR;EVYEEAGVK;EWFKVEDAIK;SEQEDEVLLVSSSR;VLQCHKPVHAEYLEK;YPDQWIVPGGGMEPEEEPGGAAVR	1;1;1;1;1;1	6	6	0.4389	83323;143401;281442;457573;588601;773889	-	Diphosphoinositol polyphosphate phosphohydrolase 2 OS=Homo sapiens GN=NUDT4 PE=1 SV=2
291_1	sp|O14756|H17B6_HUMAN	52.3331	0	35942.5	EIQHFGVK;GQTSDRLETVTLDVTK;ISIVEPGYFR;IVNVSSILGR;MESIAAATQWVK;REIQHFGVK;SWPKPAQAV;TGMTNMTQSLER;VLAACLTEK;YGVEAFSDILR;YGVEAFSDILRR;YSAGWDAK;YVFITGCDSGFGNLLAR	1;0;1;1;1;1;1;1;0;1;1;0;1	10	30	0.388	111538;551810;552373;551813;551808;233780;233774;233783;233773;233790;233771;233798;159596;159594;323251;323284;331971;190624;124004;123996;124002;351751;342482;351748;342486;351749;134859;134865;134871;134873;134868;134870;134872;134869;284351;284352;284360;375765;375762;375760;83326;83324;83327;603713;603707	-	17-beta-hydroxysteroid dehydrogenase type 6 OS=Homo sapiens GN=HSD17B6 PE=1 SV=1
291_2	sp|O75452|RDH16_HUMAN	63.7547	0	35650.5	CTQDLSLVTNCMEHALIACHPR;DKYVFITGCDSGFGK;FVADYKK;GQTSDRLETVTLDVTK;QVLSHLR;SAEQMEQK;SFLEIWDR;TESVAAAAQWVK;VAMIEPGYFK;VLAACLTEK;VSLFGGGYCISK;VVNVSSVMGR;YGVEAFSDSLR;YGVEAFSDSLRR;YSAGWDAK;YVFITGCDSGFGK	1;1;1;0;1;1;1;1;1;0;1;1;1;1;0;1	13	34	0.4921	787899;787894;518095;518094;518093;71924;551810;552373;551813;551808;63602;107641;163470;163459;163465;163474;163468;279366;279378;279373;279359;279381;217061;134859;134865;134871;134873;134868;134870;134872;134869;294916;153954;162540;153928;162553;162538;269767;269759;360099;360088;360078;360075;360083;83326;83324;83327;389503;389501	-	Retinol dehydrogenase 16 OS=Homo sapiens GN=RDH16 PE=1 SV=2
4459_1	sp|P48357|LEPR_HUMAN	12.8146	0.000204499	132408	GPEFWR;IPQSQYDVVSDHVSK;ISWEKPVFPENNLQFQIR	1;1;1	3	3	0.0335	36638;522437;713118	-	Leptin receptor OS=Homo sapiens GN=LEPR PE=1 SV=2
7410_1	sp|P07305|H10_HUMAN	24.2569	0.000204499	20850.2	GVGASGSFR;LVTTGVLK;TENSTSAPAAKPK;VGENADSQIK;YSDMIVAAIQAEK	1;1;1;1;1	5	55	0.2732	55870;55885;55897;55880;55887;55882;55894;55924;55868;55898;55912;55911;55861;53153;53136;303839;303257;303254;303255;303836;303253;303832;160959;160951;160957;382637;382641;382623;382646;382633;382645;391903;391897;391895;382603;391901;391902;391907;391896;382635;382627;382625;382642;382630;382653;392405;382629;391904;382612;382644;391906;383182;382617;391909;392406	-	Histone H1.0 OS=Homo sapiens GN=H1F0 PE=1 SV=3
2889_1	sp|Q7L7X3|TAOK1_HUMAN	15.3772	0.000204499	115997	AGNILLTEPGQVK;DLEHAMLLR;FQQHIQAQQK;KPPLFNMNAMSALYHIAQNESPTLQSNEWSDYFRNFVDSCLQK;LQHQTELTNQLEYNK	0;1;1;1;1	4	4	0.0899	326025;181158;276842;891503;591474	-	Serine/threonine-protein kinase TAO1 OS=Homo sapiens GN=TAOK1 PE=1 SV=1
2889_2	sp|Q9H2K8|TAOK3_HUMAN	30.3839	0	105340	AGNILLTEPGQVK;EVETHANNSSIELEK;FQQQILAQQK;FVDYCLQK;IPQERPTSAELLR;KQVAIIEK;LDEAQEAECQALR;LQHQTELENQLEYNK;QLIALENK	0;1;1;1;1;1;1;1;1	8	8	0.1147	326025;521136;262648;166201;422025;97359;435174;602587;97306	-	Serine/threonine-protein kinase TAO3 OS=Homo sapiens GN=TAOK3 PE=1 SV=2
5469_1	sp|O75832|PSD10_HUMAN	47.65	0	24412.4	ASTNIQDTEGNTPLHLACDEER;ASTNIQDTEGNTPLHLACDEERVEEAK;DHYEATAMHR;GAQVNAVNQNGCTPLHYAASK;GGLGLILK;LLVSQGASIYIENK;LLVSQGASIYIENKEEK;MIHILLYYK;NRHEIAVMLLEGGANPDAK;TPLQVAK	1;1;1;1;1;1;1;1;1;1	10	29	0.5221	760839;760634;760635;760636;834287;834354;261774;700934;701166;700929;701114;701137;701133;29143;29158;29159;436601;616522;616182;616178;616726;241842;241843;654355;654356;654336;654357;654354;23199	-	26S proteasome non-ATPase regulatory subunit 10 OS=Homo sapiens GN=PSMD10 PE=1 SV=1
8194_1	sp|Q96IJ6|GMPPA_HUMAN	50.8572	0	46262.1	AVILIGGPQK;GNVYIHPTAK;HPFLLLGTTANR;LLPAITILGCR;MDSESLFK;NQQDGQLEDSPGLWPGAGTIR;SAGSALYASR;SFTNQIIL;VAPSAVLGPNVSIGK;VEGTPSDPNPNDPR;YLQEFAPLGTGGGLYHFR	1;1;1;1;1;1;1;1;1;1;1	11	22	0.3262	130385;130378;130379;130374;182346;182359;326003;326013;326001;326002;260174;110908;711554;123510;123507;100912;366095;366092;366109;366093;413566;651475	-	Mannose-1-phosphate guanyltransferase alpha OS=Homo sapiens GN=GMPPA PE=1 SV=1
2078_1	sp|Q86V81|THOC4_HUMAN	24.8366	0.000204499	26871.6	GAGGFGGGGGTR;QLPDKWQHDLFDSGFGGGAGVETGGK;QQLSAEELDAQLDAYNAR;QYNGVPLDGRPMNIQLVTSQIDAQR;SLGTADVHFER	1;1;1;1;1	5	14	0.358	107655;797787;654245;654272;812106;812193;812298;812101;814087;814385;812448;262364;262333;262339	-	THO complex subunit 4 OS=Homo sapiens GN=ALYREF PE=1 SV=3
4451_1	sp|Q9H3P7|GCP60_HUMAN	56.0784	0	60556	AFHPTYEEK;CCHLFSTYVASHK;ESLPVIAAPSMWTRPQIK;FDNSYSLWR;GPGASGEQPEPGEAAAGGAAEEAR;IQQDADSVITVGR;NANKPLLDEIVPVYR;QLQEQHYQQYMQQLYQVQLAQQQAALQK;QQEVVVAGSSLPTSSK;THTDSSEKELEPEAAEEALENGPK	1;1;1;1;1;1;1;1;1;1	10	20	0.3201	195482;474108;474106;650924;237614;237618;237612;691609;691305;691603;361280;361268;541817;542272;541835;541812;865130;477918;477897;786046	-	Golgi resident protein GCP60 OS=Homo sapiens GN=ACBD3 PE=1 SV=4
4308_1	sp|Q13825|AUHM_HUMAN	56.66	0	35586.2	AIGMSLAK;AVGLISHVLEQNQEGDAAYR;AVGLISHVLEQNQEGDAAYRK;DRLEGLLAFK;GIVVLGINR;HLEEENR;LAIIPGGGGTQR;LEGLLAFK;MGLVETK;MSSSEVGPFVSK;SEVPGIFCAGADLK;SEVPGIFCAGADLKER;TEDELR	1;1;1;1;1;1;1;1;1;1;1;1;1	13	26	0.3186	36250;42683;692936;692955;692942;693186;726213;726446;221606;221615;221605;221623;102988;102994;102989;96217;207908;80699;80705;31581;276270;276280;397018;397017;545308;26214	-	Methylglutaconyl-CoA hydratase, mitochondrial OS=Homo sapiens GN=AUH PE=1 SV=1
1344_1	sp|O43660|PLRG1_HUMAN	61.1203	0	57158.1	ASVHTLSGHTNAVATVR;AVVLHPR;CIAVEPGNQWFVTGSADR;CQAAEPQIITGSHDTTIR;HYTFASGSPDNIK;IWDLASGK;LLTAEADK;LSLTGHISTVR;LWDLVAGK;TGYNFQR;VHAAVQPGSLDSESGIFACAFDQSESR;VISGHLGWVR;VYREDDTATEETHPVSWKPEIIK	1;1;1;1;1;1;1;1;1;1;1;1;1	13	38	0.3405	532191;532190;532195;532193;36924;645296;645284;645611;645294;642463;381342;381335;381337;381351;381333;80318;67250;235765;85611;85615;85610;85614;78869;78866;818227;818230;818225;818309;818231;818455;818223;818454;818310;196997;196988;196991;802993;802997	-	Pleiotropic regulator 1 OS=Homo sapiens GN=PLRG1 PE=1 SV=1
3830_1	sp|Q9UHJ6|SHPK_HUMAN	68.9576	0	51458	AAPDDPSGFAVLASCAR;AEAAVESAVAGPQGR;AVSHLVTWQDGR;CSSEFLASLPQPK;DTHLTITPTVLGER;HLPDQLASVTR;ILQALHECLAALPRPQLR;ISSSDLSLGHVTR;MIQAAVQQR;SSGFPVHLLPDIAEPGSVAGR;TGQGCEWTEGGITPVFEPR;TSHMWFEIPK;VMGSGSALSR	1;1;1;1;1;1;1;1;1;1;1;1;1	13	36	0.3808	523934;523932;523937;523938;523940;523930;368334;368336;368790;342734;342735;397007;445174;265481;265464;673768;673769;344379;344389;344404;152182;161111;152582;675610;675603;675605;675608;675602;679681;679876;287989;287990;287979;115227;122616;122625	-	Sedoheptulokinase OS=Homo sapiens GN=SHPK PE=1 SV=3
6827_1	sp|P17813|EGLN_HUMAN	7.75105	0.000581846	70533.1	TQILEWAAER;VLPGHSAGPR	1;1	2	2	0.0304	255436;127233	-	Endoglin OS=Homo sapiens GN=ENG PE=1 SV=2
6577_1	sp|P13984|T2FB_HUMAN	21.2317	0.000204499	28362.8	DLVDITKQPVVYLK;EHPFVLQSVGGQTLTVFTESSSDK;NTWELKPEYR;QNTGVWLVK	1;1;1;1	4	5	0.2289	485474;783382;323729;152238;152237	-	General transcription factor IIF subunit 2 OS=Homo sapiens GN=GTF2F2 PE=1 SV=2
6345_1	sp|P84090|ERH_HUMAN	26.0499	0.000204499	12251	ADTQTYQPYNK;ADTQTYQPYNKDWIK;IYVLLR;MYEEHLK;MYEEHLKR;TYADYESVNECMEGVCK	1;1;1;1;1;1	6	23	0.4423	319740;319744;596261;596269;596259;596268;596264;596258;31461;31474;31468;31473;31467;31472;107206;185887;185892;185886;185902;660209;660211;660212;665501	-	Enhancer of rudimentary homolog OS=Homo sapiens GN=ERH PE=1 SV=1
4349_1	sp|P01601|KVD16_HUMAN	6.11616	0.00351617	12722.2	SLIYAASSLQSGVPSR	1	1	1	0.1368	487811	-	Immunoglobulin kappa variable 1D-16 (Fragment) OS=Homo sapiens GN=IGKV1D-16 PE=3 SV=2
1509_1	sp|P29279|CTGF_HUMAN	6.34242	0.00317046	38064.8	NMMFIK;TTTLPVEFK	1;1	2	2	0.043	33229;148849	-	Connective tissue growth factor OS=Homo sapiens GN=CTGF PE=1 SV=2
3086_2	sp|Q92793|CBP_HUMAN	10.6068	0.000204499	265182	KGWHEHVTQDLR;LVQAIFPTPDPAALK;LVQAIFPTPDPAALKDR;MQVSQGMNSFNPMSLGNVQLPQAPMGPRAASPMNHSVQMNSMGSVPGMAISPSR;QIISHWK;RMENLVAYAK;SPSSPQQQQQVLNILK	1;0;0;1;0;1;1	4	4	0.0475	419756;459410;459407;459852;588998;588999;895823;90652;242377;565983	-	CREB-binding protein OS=Homo sapiens GN=CREBBP PE=1 SV=3
2310_1	sp|P09326|CD48_HUMAN	13.2381	0.000204499	27665.2	IVEWDSR;LDPQSGALYISK;LQVLDPVPKPVIK;VRLDPQSGALYISK	1;1;1;1	4	5	0.1399	87032;297300;387050;387051;442278	-	CD48 antigen OS=Homo sapiens GN=CD48 PE=1 SV=2
6384_1	sp|Q53S33|BOLA3_HUMAN	17.9293	0.000204499	12106.4	IFTSVPK;TVQQHQMVNQALK;TVQQHQMVNQALKEEIK;VTQILK	1;1;1;1	4	10	0.2804	36874;36863;430061;430076;651196;650861;650873;650874;656093;1795	-	BolA-like protein 3 OS=Homo sapiens GN=BOLA3 PE=1 SV=1
4834_1	sp|Q8N3R9|MPP5_HUMAN	16.4404	0.000204499	77245.5	FASAVPHTTR;IHNAITVHMNK;NLYGTSIDSVR;NSDLKPYIIFIAPPSQER;VYESIGQYGGETVK	1;1;1;1;1	5	7	0.0948	174041;289486;259067;670742;670749;670748;433381	-	MAGUK p55 subfamily member 5 OS=Homo sapiens GN=MPP5 PE=1 SV=3
5663_4	sp|Q96C19|EFHD2_HUMAN	37.6866	0	26680.5	AAAGELQEDSGLCVLAR;ADLNQGIGEPQSPSR;DGFIDLMELK;EFLLIFR;EVDEDFDSK;FEEEIKAEQEER;LGAPQTHLGLK;RADLNQGIGEPQSPSR;RVFNPYTEFK;SFFEAK;VFNPYTEFK;VQAINVSSR	1;1;0;1;1;1;0;1;1;0;1;1	9	15	0.4458	550461;550896;452797;233519;101846;101845;101841;171851;171850;436937;436951;437487;205162;205160;205164;533826;302622;12965;12967;12969;210348;119381	-	EF-hand domain-containing protein D2 OS=Homo sapiens GN=EFHD2 PE=1 SV=1
5663_3	sp|Q7Z7H5|TMED4_HUMAN	28.7545	0	25926.3	CFIEEIPDETMVIGNYR;DKLTELQLR;EVFLPSTPGLGMHVEVK;EVFLPSTPGLGMHVEVKDPDGK;FRLTSESTNQR;LTELQLR;MALFAGGK;SFFEAK;TQMWDK;VHLDIQVGEHANNYPEIAAK	0;1;1;1;1;1;1;0;1;1	8	20	0.4361	669900;669891;669896;669918;669893;191787;584401;738686;738688;325189;73417;43930;12965;12967;12969;43270;706053;706293;706055;706061;706275;706057;706056;706060;706059;706065;706058;706062	-	Transmembrane emp24 domain-containing protein 4 OS=Homo sapiens GN=TMED4 PE=1 SV=1
5663_2	sp|Q9BVK6|TMED9_HUMAN	29.2521	0	27260.2	CFIEEIPDETMVIGNYR;DKLSELQLR;EEYQPATPGLGMFVEVK;EEYQPATPGLGMFVEVKDPEDK;FSLFAGGMLR;LSELQLR;QLVEQVEQIQK;SFFEAK;VHLDIQVGEHANDYAEIAAK	0;1;1;1;1;1;1;0;1	7	16	0.4043	669900;669891;669896;669918;669893;183615;605675;762192;181723;181722;181749;181725;191045;181707;181720;181712;191048;66497;327106;327101;12965;12967;12969;699142	-	Transmembrane emp24 domain-containing protein 9 OS=Homo sapiens GN=TMED9 PE=1 SV=2
5663_1	sp|Q9BUP0|EFHD1_HUMAN	28.6632	0	26910.8	DGFIDLMELK;DLESMFK;EFLLIFHK;LGAPQTHLGLK;LIKDLESMFK;RLDINEGAARPR;VFNPYTEFPEFSR;VQALSSASK	0;1;1;0;1;1;1;1	6	11	0.3054	233519;71168;153566;153568;205162;205160;205164;258797;342330;486109;486096;486101;486510;80628;80626	-	EF-hand domain-containing protein D1 OS=Homo sapiens GN=EFHD1 PE=1 SV=1
445_10	sp|P07947|YES_HUMAN	38.8753	0	60762.5	AANILVGENLVCK;DAWEIPR;EVLEQVER;FQIINNTEGDWWEAR;GSLLDFLK;HYTEHADGLCHK;IADFGLAR;KLDNGGYYITTR;LGQGCFGEVWMGTWNGTTK;LIEDNEYTAR;LLLNPGNQR;MPCPQGCPESLHELMNLCWK;NGYIPSNYVAPADSIQAEEWYFGK;TLKPGTMMPEAFLQEAQIMK;VPYPGMVNR;WTAPEAALYGR;YRPENTPEPVSTSVSHYGAEPTTVSPCPSSSAK	0;0;0;1;0;1;0;0;1;0;1;1;1;1;0;0;1	8	19	0.4383	360771;360773;79244;133038;599685;599678;599687;599726;81360;81363;81361;398975;398972;398974;68096;68101;68104;360672;360673;360675;360659;361154;682018;682304;682010;258620;144083;144073;144085;144079;763508;799591;717978;717699;147792;147798;264183;867564	-	Tyrosine-protein kinase Yes OS=Homo sapiens GN=YES1 PE=1 SV=3
195_5	sp|P54855|UDB15_HUMAN	56.3449	0	60996.3	AEMWLIR;DAVLNKK;DLLNALK;FDGKKPNTLGSNTR;FSVGYTFEK;GAALSVDIR;IHHDQPMKPLDR;ILDRWIYGVSK;LEVYPTSLTK;SSAIKLEVYPTSLTK;SVINDPVYK;SVINDPVYKENVMK;TILEELVQR;VLVWPTEYSHWINMK;WIYGVSK	1;1;1;1;1;1;1;1;0;1;1;1;1;1;1	14	47	0.2434	93869;93864;93861;35102;34677;435961;435935;435946;435929;435975;168535;168529;168526;168540;85578;85564;85571;85624;409538;409533;409541;417992;417994;418027;417989;409948;331651;214802;214825;214803;214815;488333;488335;148498;148497;487734;487736;487740;496237;182980;182968;182983;182988;182979;182976;183014;183003;183010;608654;608651;63395	-	UDP-glucuronosyltransferase 2B15 OS=Homo sapiens GN=UGT2B15 PE=1 SV=3
195_4	sp|P16662|UD2B7_HUMAN	47.2674	0	60655	ADVWLIR;ANVIASALAQIPQK;FDGNKPDTLGLNTR;IEIYPTSLTK;IQHDQPVKPLDR;TELENFIMQQIK;TELENFIMQQIKR;TILDELIQR;VDFNTMSSTDLLNALK;VDFNTMSSTDLLNALKR;VINDPSYK;VINDPSYKENVMK;WIPQNDLLGHPK	1;1;0;1;0;1;1;1;0;1;1;1;0	9	88	0.2287	73355;73357;73339;73344;374910;374921;374918;374911;374925;374923;374916;374922;374913;374908;374917;374909;374920;374924;374915;374914;374927;375346;375343;374912;374905;375349;374907;374926;374906;442717;442645;442721;442571;442641;442704;442694;442666;442670;442714;442654;442727;442643;442746;442667;442566;442699;442534;443239;442681;442689;442709;442673;442708;442711;442700;442730;223780;2237…	-	UDP-glucuronosyltransferase 2B7 OS=Homo sapiens GN=UGT2B7 PE=1 SV=1
195_3	sp|P06133|UD2B4_HUMAN	45.0782	0	60473.2	ADIWLIR;ANVIASALAK;ANVIASALAKIPQK;FCKDIVSNK;FDGNKPDTLGLNTR;FEVYPVSLTK;IHHDQPVKPLDR;IPFVYSLR;TEFEDIIK;TILDELVQR;TVINDPLYK;TVINDPLYKENAMK;WIPQNDLLGHPK	1;1;1;1;0;1;0;1;1;1;1;1;0	10	33	0.2216	79410;79402;79400;111728;111733;111736;111751;375354;375890;188826;442717;442645;442721;442571;442641;442704;442694;442666;442670;442714;442654;442727;442643;442746;442667;442566;442699;442534;443239;442681;442689;442709;442673;442708;442711;442700;442730;235125;235127;235129;235130;392050;392058;392067;392046;392055;392065;392064;392068;129804;129800;129799;129460;174212;174207;174191;162147;162…	-	UDP-glucuronosyltransferase 2B4 OS=Homo sapiens GN=UGT2B4 PE=1 SV=2
195_2	sp|P36537|UDB10_HUMAN	31.6396	0	60734.2	ADIWLMR;ANVIATALAK;FDGNKPDALGLNTR;HSGGFIFPPSYVPVVMSK;IQHDQPVKPLDR;KADIWLMR;LEVYPTSLTK;NSWNFK;TVINDPSYK;TVINDPSYKENIMK;VDFNTMSSTDLLNALK;WIPQNDLLGHPK	1;1;1;1;0;1;0;1;1;1;0;0	8	23	0.2273	87111;87104;118545;426769;426763;426764;426766;426768;626101;626120;626123;386935;386934;386938;386925;386908;386932;386915;154412;147876;154399;214802;214825;214803;214815;37840;37839;149038;504685;496923;496235;504679;496239;496259;554431;554429;561018;561014;554439;554432;554824;561373;561005;561393;554414;554435;554423;371144;371149;371186;371180;371159;371141;371150;371162;371145;371118;3711…	-	UDP-glucuronosyltransferase 2B10 OS=Homo sapiens GN=UGT2B10 PE=1 SV=1
195_1	sp|Q6UWM9|UD2A3_HUMAN	25.7078	0.000204499	60215	ANIIASALAQIPQK;GAAVEINFK;IHHDQPVKPLDR;LNDFFVEIR;LYDWIPQNDLLGHPK;VILEELIVR	1;1;0;1;1;1	5	14	0.129	382313;382304;382311;382312;106919;106973;392050;392058;392067;392046;392055;392065;392064;392068;216053;571918;571923;572347;571914;572708;172329;172331	-	UDP-glucuronosyltransferase 2A3 OS=Homo sapiens GN=UGT2A3 PE=2 SV=2
2330_1	sp|O43684|BUB3_HUMAN	53.5186	0	37131.2	LCQFHR;LNQPPEDGISSVK;LYDVPANSMR;MHDLNTDQENLVGTHDAPIR;NMGYVQQR;QGYVLSSIEGR;TPCNAGTFSQPEK;VAVEYLDPSPEVQK;VLVWDLR;VYTLSVSGDR;YQHTGAVLDCAFYDPTHAWSGGLDHQLK	1;1;1;1;1;1;1;1;1;1;1	11	29	0.4268	67135;67138;351357;351371;351359;224015;224004;234103;724639;724638;720757;724640;721004;129918;137649;129914;137635;250746;250762;250760;381803;381813;455663;84947;84948;180598;180602;847349;847348	-	Mitotic checkpoint protein BUB3 OS=Homo sapiens GN=BUB3 PE=1 SV=1
1501_1	sp|Q8N2G8|GHDC_HUMAN	25.9295	0.000204499	57487.3	ALLLDALR;AVGQWAGAK;AYPEVLAQGR;GEDIGEDLFSEALGR;LSWLAGLQHR;RLEQSTLHVHQSQQQALR;VVGAYNQCPVVR	1;1;1;1;1;1;1	7	8	0.1547	78802;78795;79590;184724;473073;233848;689642;338774	-	GH3 domain-containing protein OS=Homo sapiens GN=GHDC PE=1 SV=2
652_1	sp|O15156|ZBT7B_HUMAN	4.89297	0.00939047	57990.2	AFLQTK;AVLAACSHYFK	1;1	2	2	0.0315	4293;282615	-	Zinc finger and BTB domain-containing protein 7B OS=Homo sapiens GN=ZBTB7B PE=1 SV=2
2006_1	sp|Q9NPQ8|RIC8A_HUMAN	34.6096	0	59671.5	ALLIFLEK;AMEILK;ESVAPVLSVLTECAR;HLGTLLR;LKESVAPVLSVLTECAR;LMTHLDTDVKR;QQLFQELK;SFPHDVQFFDLR;VIWLQSVR	1;1;1;1;1;1;1;1;1	9	15	0.145	106154;106156;3149;3137;3146;485319;43789;596738;596720;319959;319960;148214;420708;132818;132821	-	Synembryn-A OS=Homo sapiens GN=RIC8A PE=1 SV=3
8593_1	sp|Q9H6K4|OPA3_HUMAN	8.81057	0.00039093	19983.5	AAWNALR;LLYLGIR;QVSKPLANR	1;1;1	3	3	0.1285	40605;61147;138488	-	Optic atrophy 3 protein OS=Homo sapiens GN=OPA3 PE=1 SV=1
6715_1	sp|O14972|DSCR3_HUMAN	39.0616	0	32989.3	DATEIQNIQIADGDVCR;FTPSPVDFTITPETLQNVK;LFTCPTLETTNFK;SVELQLVR;TCEFIVHSAPQK;TEIPFEFPLHLK;VETCGCAEGYAR;VYHAGEVLSGVVVISSK	1;1;1;1;1;1;1;1	8	17	0.3704	614705;683255;683253;683263;683262;683257;455025;104403;104407;370359;370367;370363;370364;400914;400915;344590;543162	-	Down syndrome critical region protein 3 OS=Homo sapiens GN=DSCR3 PE=2 SV=1
6186_1	sp|P40818|UBP8_HUMAN	49.277	0	127444	AKPQIPAER;ALWTGQYR;CTLQDCLR;FLDPITGTFR;FYCSHCR;GEVAEEFGIIMK;IVPGLPSGWAK;LPPVLLVHLK;NLNPVFGGSGPALTGLR;QQQDYFHSILGPGNIK;SDVSPIIQPVPSIK;STGDVPHTSVTGDSGSGKPFK	1;1;1;1;1;1;1;1;1;1;1;1	12	15	0.1279	137116;129453;163327;224817;146128;316261;197748;197761;200941;200944;506270;586089;406381;662607;662588	-	Ubiquitin carboxyl-terminal hydrolase 8 OS=Homo sapiens GN=USP8 PE=1 SV=1
571_1	sp|Q5VYX0|RNLS_HUMAN	30.1008	0	37822.9	EGDCNFVAPQGISSIIK;FVSIDNK;IDVPWAGQYITSNPCIR;QQLEAVSYSSR;QTSGPLYLAVWDK;YALGLFYEAGTK	1;1;1;1;1;1	6	7	0.2251	582342;49404;640115;640099;283072;405049;322062	-	Renalase OS=Homo sapiens GN=RNLS PE=1 SV=1
1371_1	sp|Q8N5G2|MACOI_HUMAN	13.2106	0.000204499	76129.5	AVAFAAASR;IKLDLFSALGDAK;LDLFSALGDAKR;SQISSLSSTER	1;1;1;1	4	4	0.0512	68626;355290;305784;242270	-	Macoilin OS=Homo sapiens GN=TMEM57 PE=1 SV=1
7066_1	sp|P60174|TPIS_HUMAN	87.0413	0	30771.7	DCGATWVVLGHSER;FFVGGNWK;HVFGESDELIGQK;IAVAAQNCYK;IIYGGSVTGATCK;KQSLGELIGTLNAAK;QSLGELIGTLNAAK;RHVFGESDELIGQK;SNVSDAVAQSTR;TATPQQAQEVHEK;VAHALAEGLGVIACIGEK;VIADNVK;VPADTEVVCAPPTAYIDFAR;VTNGAFTGEISPGMIK;VVFEQTK;VVLAYEPVWAIGTGK	1;1;1;1;1;1;1;1;1;1;1;1;1;1;1;1	16	64	0.6364	461935;461938;461939;109808;109809;109807;109805;393900;393894;393888;206585;318634;318643;318636;318625;318645;440431;440440;440437;440436;440434;369580;369574;369577;476819;476812;264117;264692;264118;264635;264131;398680;398672;399101;571500;571531;571511;571491;24351;698906;698903;698882;698892;698897;698890;698904;698889;698898;698907;480910;480463;488803;480484;480907;480913;480915;480477;6…	-	Triosephosphate isomerase OS=Homo sapiens GN=TPI1 PE=1 SV=3
4342_1	sp|P21579|SYT1_HUMAN	9.71003	0.000204499	47542.8	LTVVILEAK;TLNPVFNEQFTFK	1;1	2	2	0.0521	125109;461222	-	Synaptotagmin-1 OS=Homo sapiens GN=SYT1 PE=1 SV=1
1546_1	sp|Q6PHW0|IYD1_HUMAN	19.6428	0.000204499	33338.5	FISNEQVPMEVIDNVIR;LLMLLPVGYPSK;RKPLDQIMVTV;SQEFYELLNK;TAGTAPSGAHTEPWTFVVVK;VLLGRPAHEK	1;1;1;1;1;1	6	9	0.2768	649378;321380;321383;302218;302213;302209;285441;660553;194391	-	Iodotyrosine deiodinase 1 OS=Homo sapiens GN=IYD PE=1 SV=2
3670_1	sp|P22670|RFX1_HUMAN	10.4748	0.000204499	104693	AILVLLSK;AVLQNTAQINQMLSDLNR;VAAAGAFAQTLR	1;1;1	3	3	0.0388	65635;652715;230688	-	MHC class II regulatory factor RFX1 OS=Homo sapiens GN=RFX1 PE=1 SV=2
8331_1	sp|O00519|FAAH1_HUMAN	27.3109	0	63025.2	ALLCEDMFR;ELAPEAVLFTYVGK;GYFGDIWDK;LDPTVPPLPFREEVYTSSQPLR;LSVGPMAR;LWELQHEIEVYR;VGYYETDNYTMPSPAMR	1;1;1;1;1;1;1	7	8	0.1572	216945;437248;182650;773989;52886;60466;476845;641745	-	Fatty-acid amide hydrolase 1 OS=Homo sapiens GN=FAAH PE=1 SV=2
7285_1	sp|Q96S99|PKHF1_HUMAN	6.29459	0.00334572	31174.7	IAAVESCFGASGQPLALPGR;SFVVSAASATER	1;1	2	2	0.1147	643861;259028	-	Pleckstrin homology domain-containing family F member 1 OS=Homo sapiens GN=PLEKHF1 PE=1 SV=3
1613_2	sp|O95822|DCMC_HUMAN	99.7903	0	54968.8	ADLLEAQALK;ALQTPLMR;AMDELLR;ASEQVLSLVAQFQK;AVPPTPAYELR;EAAVLLQAEDR;EHPPSETEEK;EISEITGGPINETLK;EKTPAPAEGQCADFVSFYGGLAETAQR;GFGVDHGQVAEQSAGVLHLR;GITGSCGLMANYR;GLFHHISK;INWMADVSLR;ISEAEAVHPVK;LCAWYLYGEK;LLLSSSEWVQSEK;NELFTDSECKEISEITGGPINETLK;NWMDMK;RAVPPTPAYELR;TPAPAEGQCADFVSFYGGLAETAQR;VTWHSPCEVLQK;YFLEETGPNSTSYLGSK	1;1;1;1;1;1;1;1;1;1;1;1;1;1;1;1;1;1;1;1;1;1	22	66	0.4949	166055;166057;97741;60850;442848;442842;442835;442843;442841;442846;442805;443472;443469;253727;253706;253722;253693;253687;253740;253698;253697;253692;253721;254317;234802;470334;470336;821869;821871;821866;821873;821996;667442;667448;667454;667451;667449;667462;369727;102139;102145;248086;233124;233103;233117;303760;303761;303758;419830;419823;419824;813572;49939;343406;790072;790075;790065;407…	-	Malonyl-CoA decarboxylase, mitochondrial OS=Homo sapiens GN=MLYCD PE=1 SV=3
7751_1	sp|Q14624|ITIH4_HUMAN	91.4678	0	103293	AEAQAQYSAAVAK;ANTVQEATFQMELPK;FAHTVVTSR;GPDVLTATVSGK;ILDDLSPR;IPKPEASFSPR;ITFELVYEELLK;LAILPASAPPATSNPDPAVSR;LALDNGGLAR;LGVYELLLK;NGIDIYSLTVDSR;NMEQFQVSVSVAPNAK;NPLVWVHASPEHVVVTR;NVVFVIDK;QGPVNLLSDPEQGVEVTGQYER;SPEQQETVLDGNLIIR;WKETLFSVMPGLK;YIFHNFMER;YYLQGAK	1;1;1;1;1;1;1;1;1;1;1;1;1;1;1;1;1;1;1	19	33	0.2591	306912;306936;524850;524842;524866;140903;140887;210559;97140;260999;414876;657535;132161;154101;154102;154103;154105;154104;391298;390817;545313;622660;622664;623040;100061;100054;751123;573103;436587;277192;285833;277196;58173	-	Inter-alpha-trypsin inhibitor heavy chain H4 OS=Homo sapiens GN=ITIH4 PE=1 SV=4
1643_1	sp|Q14195|DPYL3_HUMAN	69.213	0	61924.1	AITIASQTNCPLYVTK;DNFTAIPEGTNGVEER;FIPCSPFSDYVYK;GAPLVVICQGK;GMTTVDDFFQGTK;GMYDGPVFDLTTTPK;IFNLYPR;IMLEDGNLHVTQGAGR;IVAPPGGR;IVNDDQSFYADIYMEDGLIK;MADLHAVPR;MDENQFVAVTSTNAAK;MSVIWDK;NHQSAAEYNIFEGMELR;NLHQSGFSLSGTQVDEGVR;QIGDNLIVPGGVK;SAADLISQAR;SCCDYALHVDITHWNDSVK	1;1;1;1;1;1;0;1;0;0;1;0;0;1;1;1;1;1	13	29	0.4298	559207;559555;559953;545235;545236;545231;480799;480794;480803;480795;208893;208967;387163;396151;396147;499203;95221;95219;95220;95223;95217;526845;526843;527216;526863;27719;27723;737753;136961;144373;534118;541983;534130;534530;76259;76262;76260;76258;645883;645891;653013;653604;308223;147329;730957	-	Dihydropyrimidinase-related protein 3 OS=Homo sapiens GN=DPYSL3 PE=1 SV=1
1643_3	sp|Q16555|DPYL2_HUMAN	122.04	0	62254.6	AITIANQTNCPLYITK;DIGAIAQVHAENGDIIAEEQQR;DNFTLIPEGTNGTEER;FQMPDQGMTSADDFFQGTK;GIQEEMEALVK;GLYDGPVCEVSVTPK;GSPLVVISQGK;GTVVYGEPITASLGTDGSHYWSK;IAVGSDADLVIWDPDSVK;ILDLGITGPEGHVLSRPEEVEAEAVNR;IVAPPGGR;IVLEDGTLHVTEGSGR;IVNDDQSFYADIYMEDGLIK;KPFPDFVYK;MDENQFVAVTSTNAAK;MSVIWDK;MVIPGGIDVHTR;NLHQSGFSLSGAQIDDNIPR;NLHQSGFSLSGAQIDDNIPRR;QIGENLIVPGGVK;QQAPPVR;SCCDYSLHVDISEWHK;SSAEVIAQAR;THNSSLEYNIFEGMECR;TVTPA…	1;1;1;1;1;1;1;1;1;1;0;1;0;1;0;0;1;1;1;1;1;1;1;1;1;1	22	108	0.6399	576869;576874;576868;576870;576867;577316;577654;743692;743686;743694;743915;743898;743910;743916;744147;564871;564875;564865;564880;687414;691588;687413;687604;687410;691962;691960;687411;691583;691589;691957;691587;687415;687607;691585;692476;692475;687412;687416;271806;271805;272497;479748;479743;479739;479745;479737;479690;172819;752783;752784;752792;607382;607395;821936;821935;821941;821932;…	-	Dihydropyrimidinase-related protein 2 OS=Homo sapiens GN=DPYSL2 PE=1 SV=1
1643_2	sp|Q14117|DPYS_HUMAN	117.286	0	56593.7	AALSGGTTMIIDFAIPQK;AITIASAVNCPLYIVHVMSK;ALGHDLLPPGGAPAGLR;ALGKDDFTK;APYKGEVATLK;CKEIGAIAQVHAENGDLIAEGAK;DRTCTPTPVER;EIGAIAQVHAENGDLIAEGAK;EIGAIAQVHAENGDLIAEGAKK;FVAVTSTNAAK;GGSLIEAFETWR;GKVVYEAGVFSVTAGDGK;IFNLYPR;ILVQDKGVNSFK;IPNGVNGVEDR;KPFAEYIYK;LVLPGGIDTHTHMQFPFMGSR;MDENRFVAVTSTNAAK;MFMAYK;MLALGITGPEGHELCRPEAVEAEATLR;MSVIWEK;SIDDFHQGTK;TCTPTPVER;VVYEAGVFSVTAGDGK;VVYGEPIAASLGTDGTHYWNK	1;1;1;1;1;1;1;1;1;1;1;1;0;1;1;1;1;1;1;1;1;1;1;1;1	24	104	0.553	588238;588235;588233;588234;701799;697808;475313;475307;475296;475317;475310;475308;475298;475294;475293;475292;475322;475315;475303;475321;475309;475311;475297;475316;475304;475302;475314;475295;475305;475299;129501;129489;231230;747001;747219;321497;675590;675579;675582;675591;675761;675751;710364;187896;187902;187908;187910;187884;187900;187873;187927;340814;340810;560717;560784;95221;95219;95…	-	Dihydropyrimidinase OS=Homo sapiens GN=DPYS PE=1 SV=1
3678_1	sp|P19474|RO52_HUMAN	53.0629	0	54135.1	ALCWVCAQSR;DHAMVPLEEAAQEYQEK;FDSYPMVLGAQHFHSGK;GGGSVCPVCR;HYWEVDVTGK;IHAEFVQQK;LAQQSQALQELISELDRR;LGDTQQSIPGNEER;LQVALGELR;LQVALGELRR;NFLVEEEQR;QLANMVNNLK;SESWNLKDLDITSPELR	1;1;1;1;1;1;1;1;1;1;1;1;1	13	26	0.3179	274142;274147;639659;615990;616001;615993;154158;154161;263402;182349;182348;182334;673737;440593;441147;131890;131887;131884;217305;217307;222559;210532;220727;220711;644159;644145	-	E3 ubiquitin-protein ligase TRIM21 OS=Homo sapiens GN=TRIM21 PE=1 SV=1
1961_1	sp|P49593|PPM1F_HUMAN	42.7323	0	49800.1	AIGDVFQKPYVSGEADAASR;AYFAVFDGHGGVDAAR;DPQELLEGGNQGEGDPQAEGR;IEALGGFVSHMDCWR;LWEVAGQWQK;QWLVSIHAIR;TDQMFLR;VAEELVAAAR;VNGTLAVSR;YAAVHVHTNAAR	1;1;1;1;1;1;1;1;1;1	10	18	0.2863	668489;668513;668466;668465;668484;668478;496789;699804;558270;558254;270611;270616;258472;90063;145947;93216;308007;308021	-	Protein phosphatase 1F OS=Homo sapiens GN=PPM1F PE=1 SV=3
8283_1	sp|P09234|RU1C_HUMAN	18.524	0.000204499	17381.2	ENVKDYYQK;FYCDYCDTYLTHDSPSVR;TTAAFQQGK;WMEEQAQSLIDK	1;1;1;1	4	12	0.3019	237134;726305;726304;726306;108148;108159;108156;108162;108174;108160;404803;404745	-	U1 small nuclear ribonucleoprotein C OS=Homo sapiens GN=SNRPC PE=1 SV=1
1265_1	sp|Q9P265|DIP2B_HUMAN	74.6428	0	171382	AILSMNGLSYGVIR;EGSVMGVTVSR;GAPQSLLLSESGK;GHLNAGDNVVLLYPPGIELIAAFYGCLYAGCIPVTVRPPHAQNLTATLPTVR;GLGNQVEVLK;GTTVCTASCLQLHK;LAYTLLNK;LSFGDAAQTLWAR;MIVDVSK;MSHSAVNALCR;SDIHTEAVQAALAK;SIQGSSTSSSASSTLSHGEVK;TPLGGIHISQTK;TQNGEIVQFK;TWPTIIDTDDLPR;VALQQSFSK;VVIVNPETK	1;1;1;1;1;1;0;1;1;1;1;1;1;1;1;1;1	16	19	0.1529	413403;195642;294445;294440;894340;158969;456528;100999;380870;381551;36742;271053;271057;391419;654788;274907;223638;440194;136145;131872	-	Disco-interacting protein 2 homolog B OS=Homo sapiens GN=DIP2B PE=1 SV=3
1265_3	sp|Q9Y2E4|DIP2C_HUMAN	58.9335	0	170658	DGSVLGVTVTR;DINLSSLR;DMHWALVAHR;GAIANSLTCVQLHK;GLGSQTESLK;IALTQSFSK;IAQASGR;IIIANPETK;IQQLVNTLK;LLWFVTESK;LQCELYPSR;LSFGDTQTIWAR;MSHAATSAFCR;QEVICPCASSPEALTVAIR;SPTGEIPQFK;TGYLGFLR;TWPLILDTDDLPK;VAYSILHK;VNPLSWIQK;YHPIDIETSVIR	1;1;1;1;1;0;0;1;1;1;0;0;1;1;1;0;1;1;1;0	14	24	0.133	184813;184811;93546;264705;423216;141856;129781;130224;2262;131869;131880;159079;196406;196405;196409;224007;223987;357478;266472;674304;674609;184694;184686;184695;96378;431107;431112;431120;431110;98378;172771;384923;384922	-	Disco-interacting protein 2 homolog C OS=Homo sapiens GN=DIP2C PE=1 SV=2
1265_2	sp|Q14689|DIP2A_HUMAN	50.0417	0	170261	APLGGIHISETK;AVYTLTYGK;GEPLTAGVPRPPSLLATLQR;GLGAQTGVLR;GTVTSTATCVQLHK;IALTQSFSK;IAQASGR;LAYTLLNK;LEGTPYLCK;LQCELYPSR;LSFGDTQTIWAR;MIVEVSK;NVFEAVPVTTGGAPIFDRPFTR;SACVLTTQAVTR;SPCLTALDTTGK;TGYLGFLR;TWPTILDTDDIPK;VAAALMEK;YHPIDIETSVIR	1;1;1;1;1;0;0;0;1;0;0;1;1;1;1;0;1;1;0	12	14	0.1356	258420;139819;666051;118468;418131;418117;129781;130224;2262;100999;170468;224007;223987;357478;42312;746479;746478;306287;280643;96378;424591;54063;384923;384922	-	Disco-interacting protein 2 homolog A OS=Homo sapiens GN=DIP2A PE=1 SV=2
6319_1	sp|Q9UJ14|GGT7_HUMAN	14.1744	0.000204499	70422.8	GLHEAHQLYGR;LPSSSSEMGSQDGSPLR;VDVLSWVHGSR	1;1;1	3	3	0.0589	291190;539002;276372	-	Gamma-glutamyltransferase 7 OS=Homo sapiens GN=GGT7 PE=1 SV=2
68_1	sp|O43169|CYB5B_HUMAN	14.2713	0.000204499	16322	ELWLVIHGR;GQEVETSVTYYR;QYYIGDIHPSDLKPESGSK	1;1;1	3	7	0.274	196506;196503;196504;378578;378581;379097;683206	-	Cytochrome b5 type B OS=Homo sapiens GN=CYB5B PE=1 SV=2
2648_1	sp|O00159|MYO1C_HUMAN	180.056	0	121606	AVASEIFK;CPENAFFLDHVR;DGTIDFTPGSELLITK;DLQIYSR;DQAVMISGESGAGK;EASELLR;FDEVLIR;GAPVGGHILSYLLEK;GDVVLQSDHVIETLTK;GEELLSPLNLEQAAYAR;HLGYKPEEYK;KDNYPQSVPR;KYEAFLQR;LFISTR;LGTDEISPR;LLQFYAETCPAPER;LLQSNPVLEAFGNAK;LLSVEGSTLR;NGHLAVVAPR;NPIMSQCFDR;NPQSYLYLVK;QKGDVVLQSDHVIETLTK;QLLLTPNAVVIVEDAK;QLPQNVLDTSWPTPPPALR;QPGRFDEVLIR;SAICIQSWWR;SISPEWK;SLCPETWPTWAGRPQDGVAVLVR;SRVVHQNHGER;TALSANR;TFTWLVGK;TLFATED…	1;1;1;1;1;1;1;1;1;1;1;1;1;1;1;1;1;1;1;1;1;1;1;1;1;1;1;1;1;1;1;1;1;1;1;1;1;1;1;1	40	92	0.3979	69380;419168;419158;419630;524934;524939;524927;524953;524951;82069;331170;331151;47158;80952;445678;445674;547634;597681;597678;597676;598194;280684;280683;280674;247548;157816;16642;125669;518756;518770;518757;518753;470369;470371;470378;470367;470375;470365;470373;470368;167289;148227;148554;148543;282898;259182;259183;259181;646336;646334;646333;646331;533075;533077;533073;533076;682457;68263…	-	Unconventional myosin-Ic OS=Homo sapiens GN=MYO1C PE=1 SV=4
4774_1	sp|O15382|BCAT2_HUMAN	15.2108	0.000204499	44259.1	AHEWMFPV;EVFGSGTACQVCPVHR;LGGNYGPTVLVQQEALKR	1;1;1	3	3	0.1071	140258;569466;623803	-	Branched-chain-amino-acid aminotransferase, mitochondrial OS=Homo sapiens GN=BCAT2 PE=1 SV=2
7710_1	sp|Q8TED0|UTP15_HUMAN	21.95	0.000204499	58378.6	AVHTVDFTADKYHVVSGADDYTVK;GVLANALAGR;ITQDTLYWNNYK;TVTCLCLSSSGQR;VLDPTCTIK	1;1;1;1;1	5	6	0.1313	789473;103359;448090;448577;399663;153188	-	U3 small nucleolar RNA-associated protein 15 homolog OS=Homo sapiens GN=UTP15 PE=1 SV=3
7833_1	sp|Q8IV63|VRK3_HUMAN	7.87574	0.000581846	52847.7	FLVLPSLGR;VTTSLEALPTGTVLTDK	1;1	2	2	0.0549	133351;544015	-	Inactive serine/threonine-protein kinase VRK3 OS=Homo sapiens GN=VRK3 PE=1 SV=2
803_1	sp|Q86X83|COMD2_HUMAN	20.5073	0.000204499	22731.1	IAVEFLR;LDVQLASR;LHLNQNGDHNTK;LLLQLYLDNRK;QQIKPAVTIK	1;1;1;1;1	5	12	0.2412	61106;61115;61117;85590;85556;355475;356192;354243;354245;198442;198439;198436	-	COMM domain-containing protein 2 OS=Homo sapiens GN=COMMD2 PE=1 SV=2
5306_1	sp|Q9Y2P8|RCL1_HUMAN	7.35464	0.000765111	40816.6	LLLEEIYR;VSPQMANR	1;1	2	5	0.0429	154523;154513;154514;86061;86039	-	RNA 3'-terminal phosphate cyclase-like protein OS=Homo sapiens GN=RCL1 PE=1 SV=3
7522_1	sp|Q9NVZ3|NECP2_HUMAN	19.2641	0.000204499	28321.3	AAEWQLDQPSWSGR;AFIGIGFGDR;GDAFDFNVALQDHFK;LNIANMK;TSGELFAQAPVDQFPGTAVESVTDSSR	1;1;1;1;1	5	14	0.2776	485034;156595;533696;533208;41353;41348;810122;810012;810222;810004;810018;810019;810016;810119	-	Adaptin ear-binding coat-associated protein 2 OS=Homo sapiens GN=NECAP2 PE=1 SV=1
918_2	sp|Q13188|STK3_HUMAN	15.0214	0.000204499	56265	AGNILLNTEGHAK;AIFMIPTNPPPTFR;EISIMQQCDSPYVVK;GLEYLHFMR;KPELWSDDFTDFVK;LGEGSYGSVFK;QPEEVFDVLEK;VPQDGDFDFLK;YYGSYFK	0;0;1;0;1;1;0;1;0	4	4	0.2138	325362;325304;325392;470827;470828;470838;566547;224082;224078;534561;209731;322503;291125;96550	-	Serine/threonine-protein kinase 3 OS=Homo sapiens GN=STK3 PE=1 SV=2
918_1	sp|Q13043|STK4_HUMAN	9.45841	0.000204499	55594.9	AGNILLNTEGHAK;AIFMIPTNPPPTFR;GLEYLHFMR;KPELWSDNFTDFVK;QPEEVFDVLEK;RQPILDAIEAK;YYGSYFK	0;0;0;1;0;1;0	2	2	0.1622	325362;325304;325392;470827;470828;470838;224082;224078;534177;322503;275946;96550	-	Serine/threonine-protein kinase 4 OS=Homo sapiens GN=STK4 PE=1 SV=2
3654_1	sp|P54577|SYYC_HUMAN	171.612	0	59106.1	AFCEPGNVENNGVLSFIK;AMLESIGVPLEK;APWELLELR;DFAAEVVHPGDLK;EYTLDVYR;FNTPALK;GQPDEELKPK;GVESQGMLLCASIEGINR;HPDADSLYVEK;HVLFPLK;IADFLK;IDVGEAEPR;IFTFAEK;IITVEKHPDADSLYVEK;ISEECIAQWK;KAFCEPGNVENNGVLSFIK;KIFTFAEK;KLASAAYPDPSK;LASAAYPDPSK;LGSISCK;LSSVVTQHDSK;MSSSEEESK;MSSSEEESKIDLLDR;NLQEVLGEEK;NSEPEEVIPSR;NSVEVALNK;QTNFMTK;QVEPLDPPAGSAPGEHVFVK;SEFVILR;SEFVILRDEK;TVVSGLVQFVPK;TVVSGLVQFVPKEELQDR;VDAQFGGID…	1;1;1;1;1;1;1;1;1;1;1;1;1;1;1;1;1;1;1;1;1;1;1;1;1;1;1;1;1;1;1;1;1;1;1;1	36	91	0.6193	641582;641587;641577;641593;641794;641803;641818;294452;303961;199193;199194;199174;199190;199198;199188;359111;359075;159785;159783;36229;208272;620695;626312;286414;286450;286454;64100;64101;64102;64099;3798;3821;3864;3838;3830;3842;124793;64894;64892;64891;64896;628960;280593;280575;680300;124121;124016;272552;194168;27030;245600;245590;138605;540663;540661;540667;540669;219489;277235;277255;1…	-	Tyrosine--tRNA ligase, cytoplasmic OS=Homo sapiens GN=YARS PE=1 SV=4
8470_1	sp|A6NIH7|U119B_HUMAN	15.0484	0.000204499	28119	AGGGVLNR;LIMHNK;LMIENPYETR;VTENYLCKPEDNIYSIDFTR	1;1;1;1	4	4	0.1753	18407;22831;281768;761838	-	Protein unc-119 homolog B OS=Homo sapiens GN=UNC119B PE=1 SV=1
7230_1	sp|O15488|GLYG2_HUMAN	11.4536	0.000204499	55149.2	LVVLITPQVSSLLR;NWSTTDIHK;RPELGLTLTK	1;1;1	3	5	0.0659	437916;437913;183278;183276;200016	-	Glycogenin-2 OS=Homo sapiens GN=GYG2 PE=1 SV=2
7098_1	sp|Q01995|TAGL_HUMAN	68.0123	0	22596.4	AAEDYGVIK;GDPNWFMK;HVIGLQMGSNR;KYDEELEER;LGFQVWLK;LVEWIIVQCGPDVGRPDR;LVNSLYPDGSKPVK;LVNSLYPDGSKPVKVPENPPSMVFK;QMEQVAQFLK;TDMFQTVDLFEGK;TDMFQTVDLFEGKDMAAVQR;TLMALGSLAVTK;VPENPPSMVFK;YDEELEER	1;1;1;1;1;1;1;1;1;1;1;1;1;1	14	49	0.6468	115727;129237;252420;251691;251682;127314;127316;127317;127315;676376;676373;676375;676379;676367;676377;426444;426450;426446;426929;426445;802924;802925;257846;257844;266118;266082;433273;433277;433269;433271;433275;441968;433855;433846;433339;730469;726970;248317;248298;248315;248303;248306;248301;257591;257595;270579;270572;279275;171408	-	Transgelin OS=Homo sapiens GN=TAGLN PE=1 SV=4
5698_1	sp|P07306|ASGR1_HUMAN	55.918	0	33165	DLSEDHSSLLLHVK;EYQDLQHLDNEESDHHQLR;FVQHHIGPVNTWMGLHDQNGPWK;GLSTQGGNVGR;GPPPPQPLLQR;LEDAHLVVVTSWEEQK;NWRPEQPDDWYGHGLGGGEDCAHFTDDGR;QFVSDLR;SCYWFSR;SLESQLEK;TCCPVNWVEHER;TKEYQDLQHLDNEESDHHQLR	1;1;1;1;1;1;1;1;1;1;1;1	12	34	0.5464	466078;466068;466071;466061;466067;749568;749385;749386;749381;797282;797400;797397;152569;152574;152579;153001;152572;152581;245277;601182;601183;858693;69284;69288;69197;135081;99910;99908;461881;461882;462458;462462;789090;789089	-	Asialoglycoprotein receptor 1 OS=Homo sapiens GN=ASGR1 PE=1 SV=2
6354_1	sp|P14621|ACYP2_HUMAN	29.3381	0	11132.6	GTVTGQVQGPEDK;GTVTGQVQGPEDKVNSMK;IGVVGWVK;LEYSNFSIRY;STAQSLK;SVDYEVFGR;VQGVCFR	1;1;1;1;1;1;1	7	14	0.596	311508;311473;598117;598499;598110;66081;66086;66091;297102;16028;165765;165770;69569;69571	-	Acylphosphatase-2 OS=Homo sapiens GN=ACYP2 PE=1 SV=2
4967_2	sp|Q9Y678|COPG1_HUMAN	131.932	0	97655.5	AGAVSALAK;ALCQITDSTMLQAIER;ALQQYTLEPSEKPFDLK;ATFYLNVLEQK;CSFDVVKR;DEESGGGSNPFQHLEK;GGHDILVR;GLGPLFK;HPSAVTACNLDLENLVTDSNR;ILHLLGQEGPK;KDEESGGGSNPFQHLEK;LFQSNDPTLR;LFQSNDPTLRR;LLLLDTVTMQVTAR;MCYLTIK;NKHEMVVYEAASAIVNLPGCSAK;NTHTLLLAGVFR;QEIFQEQLAAVPEFR;QISSFMSEISDEFK;SAVLQEAR;SLPYNQPGTCYTLVALPK;SSPEPVALTESETEYVIR;SVPLATAPMAEQR;TLEEAVGNIVK;VFNETPINPR;VPSVSSSALVSSLHLLK;VVLEHEEVR;VVVVQAISALCQK	1;1;1;1;1;1;1;1;1;1;1;1;1;1;0;1;1;1;1;0;1;1;1;1;1;1;1;0	25	96	0.3867	35097;588146;588137;594271;594224;588149;595216;588140;645451;645450;645746;318000;317992;137372;536906;536904;537393;70371;70365;14830;14829;14824;14833;14835;732295;732555;732292;248325;248324;248327;248322;248323;248321;591348;591341;239738;329861;329852;329856;464218;464222;464220;464216;464217;97041;104608;763749;763750;766903;764071;327157;327159;570232;570227;570240;570673;570220;570231;57…	-	Coatomer subunit gamma-1 OS=Homo sapiens GN=COPG1 PE=1 SV=1
4967_1	sp|Q9UBF2|COPG2_HUMAN	38.8657	0	97559.6	AEITLVATKPEK;ALHQYTLEPSEKPFDMK;GGYDLLVR;IFNETPINPR;ITDGTMLQAIER;LFQSNDQTLR;MCYLTIK;NSHSLYLAGIFR;SAVLQEAR;SSEPVQLTEAETEYFVR;VVLENEAVR;VVVVQAISALCQK	1;1;1;1;1;1;0;1;0;1;1;0	9	12	0.155	302222;653947;81304;81289;81306;245667;245677;330236;258308;97041;104608;347516;73728;638169;145940;369598;369603;369596;369599;369591;369584;369606;369607;370125	-	Coatomer subunit gamma-2 OS=Homo sapiens GN=COPG2 PE=1 SV=1
8656_1	sp|Q9UL15|BAG5_HUMAN	42.1621	0	51167.7	ELEQNANHPHR;ICAVQEIIEDCMK;KQPSLPLSEDAHPSVAK;LAQNILSYLDLK;NELLQAQNPSELYLSSK;QLLALDAVDPQGEEK;SVEQQVIGFSGLSDDKNYK;YLDLEEEADTTK	1;1;1;1;1;1;1;1	8	18	0.2595	328446;473586;473572;569726;569725;569737;355971;620780;621180;620772;620771;482352;677620;677613;677622;375981;375991;375988	-	BAG family molecular chaperone regulator 5 OS=Homo sapiens GN=BAG5 PE=1 SV=1
1652_2	sp|P31513|FMO3_HUMAN	151.176	0	59994.4	CFHSR;DYKEPGVFNGK;EPGVFNGKR;ESAVFDAVMVCSGHHVYPNLPK;ESFPGLNHFK;FGTFLK;FKHENYGLMPLNGVLR;FSDHAEEGR;GTCTLPSMEDMMNDINEK;GVFPPLLEK;HENYGLMPLNGVLR;HPDFATTGQWDVTTER;IQEYIIAFAK;KESAVFDAVMVCSGHHVYPNLPK;LAMEVYFGPCSPYQFR;LVGPGQWPGAR;NAILTQWDR;NNEIILFK;NNLPTAISDWLYVK;SCLEEGLEPTCFEK;SGSWVMSR;SLKPMQTR;SNDIGGLWK;SRNNEIILFK;SVFSNSSK;TAEQVMISSR;TFVSSVNK;TFVSSVNKHPDFATTGQWDVTTER;VAIIGAGVSGLASIR;VLVVGLGNSGCDIATELSR;…	1;1;1;1;1;1;1;1;1;1;1;1;1;1;1;1;0;1;1;1;1;1;1;1;1;1;1;1;1;1;1	30	278	0.5639	3584;3578;275702;275724;275705;275696;275699;276262;275711;275703;276268;275700;275687;276250;276253;276272;134332;134330;757992;757996;757988;757983;757991;757995;757993;758150;757990;761024;757989;761019;758134;757982;761012;758003;761013;761022;761017;757974;757969;761018;757968;761025;758133;230321;230311;230319;230309;230300;230303;230313;230322;230312;230299;230293;230949;230956;230947;2302…	-	Dimethylaniline monooxygenase [N-oxide-forming] 3 OS=Homo sapiens GN=FMO3 PE=1 SV=5
4617_1	sp|Q8WTW3|COG1_HUMAN	40.0928	0	108909	AELQSIEEGVQGQQDALNSAK;AQAISPCVQNFCSALDSK;DPAALFETHGAEEIR;FPILIR;LDDLLAYLPSDDSSLPK;LDLRDPAALFETHGAEEIR;LLNQPHHGAGIK;SCMVQVVAAYEK;TQSVACIK;YADAGTVQEMLR	1;1;1;1;1;1;1;1;1;1	10	13	0.1276	705578;641767;641806;498509;24632;24633;24641;592795;688032;293282;352225;88414;333511	-	Conserved oligomeric Golgi complex subunit 1 OS=Homo sapiens GN=COG1 PE=1 SV=1
3327_1	sp|P21912|SDHB_HUMAN	84.6922	0	31608.8	AGDKPHMQTYEVDLNK;CGPMVLDALIK;CGPMVLDALIKIK;CHTIMNCTR;DDFTEER;DLVPDLSNFYAQYK;EGICGSCAMNINGGNTLACTR;GAQTAAATAPR;IKNEVDSTLTFR;IYPLPHMYVIK;LQDPFSLYR;MMATYK;QQYLQSIEER;RIDTNLNK;SIEPYLK;SIEPYLKK;WDPDKAGDKPHMQTYEVDLNK;WMIDSR;YLGPAVLMQAYR	1;1;1;1;1;1;1;1;1;1;1;1;1;1;1;1;1;1;1	19	101	0.6286	586426;586432;586416;586808;592646;592631;586408;255463;255467;255469;255465;263027;255471;263040;255464;393641;240771;90416;90417;90419;90420;507655;507660;507676;507656;507672;715590;715601;719483;715860;719485;715893;715858;715861;716142;715614;719481;715890;719482;715867;715567;715520;716144;716415;139235;374225;374226;374793;374218;374216;374222;374242;345553;345557;345560;345563;345547;3455…	-	Succinate dehydrogenase [ubiquinone] iron-sulfur subunit, mitochondrial OS=Homo sapiens GN=SDHB PE=1 SV=3
271_1	sp|Q8TBF2|PGFS_HUMAN	10.695	0.000204499	21209.1	EHACVVAGLR;FGCVVCR;VGACILK;VLLHFVQK	1;1;1;1	4	4	0.1616	189472;83325;25680;124193	-	Prostamide/prostaglandin F synthase OS=Homo sapiens GN=FAM213B PE=1 SV=1
8236_1	sp|Q9BS40|LXN_HUMAN	9.83214	0.000204499	25733.9	AALVAQNYINYQQGTPHR;FAVEEIIQK	1;1	2	2	0.1216	657444;168322	-	Latexin OS=Homo sapiens GN=LXN PE=1 SV=2
7529_1	sp|P82930|RT34_HUMAN	32.7349	0	25634.5	AMIIAER;AWGILTFK;DSQLYAVDYETLTRPFSGR;EQLNRPR;LLQLLGR;LPLFGLGR;NGDTSTEEPMLNVQR;VRPDYTAQNLDHGK	1;1;1;1;1;1;1;1	8	17	0.3899	41366;100958;100953;100955;706007;706009;706008;706012;91043;44997;44994;73460;73481;73469;517182;476189;476181	-	28S ribosomal protein S34, mitochondrial OS=Homo sapiens GN=MRPS34 PE=1 SV=2
2607_1	sp|P50440|GATM_HUMAN	130.2	0	48424.3	AENACVPPFTIEVK;AGWTIITPPTPIIPDDHPLWMSSK;ATEPLPK;AVAEIEEMCNILK;DCPVSSYNEWDPLEEVIVGR;DYFHR;FVTTEFEPCFDAADFIR;HLAPDYR;KAVAEIEEMCNILK;LGITTIK;NANSLGGGFHCWTCDVR;NSCAADDKATEPLPK;RGTLQSYLD;RHLAPDYR;RPDPIDWSLK;RVMVDANEVPIQK;SIIKDYFHR;SQVTNYLGIEWMR;SRFFEYR;TEGVTVR;TPDFESTGLYSAMPR;VHIISFK;VMVDANEVPIQK;WLSMNVLMLDEK;WLSMNVLMLDEKR;WTTAPKPTMADELYNQDYPIHSVEDR;YKTPDFESTGLYSAMPR;YWPFYQK	1;1;1;1;1;1;1;1;1;1;1;1;1;1;1;1;1;1;1;1;1;1;1;1;1;1;1;1	28	308	0.6454	456131;456114;456112;456137;456132;456127;456119;456139;456104;456113;456120;456117;456115;456116;456143;456121;456125;456118;456128;456144;456135;456153;456130;456129;456111;456122;456123;456087;456138;456146;456126;456098;456106;456102;456140;456610;456099;456133;456107;796290;794056;22837;22836;427770;427748;427757;436382;436378;436379;436372;427718;427753;427756;427750;436367;427754;427740;42…	-	Glycine amidinotransferase, mitochondrial OS=Homo sapiens GN=GATM PE=1 SV=1
549_2	sp|O95487|SC24B_HUMAN	113.065	0	137331	AEFFQHLIEDR;CNLCYR;CTLTNIPQTQALLNK;DLLNALPNMFTNTR;DLTQLPVITSNTIVR;DSRPLSPILHIVK;DSRPLSPILHIVKDESPAK;ETHSALGPALQAAFK;GLSMHTFHGNFFVR;IGFEAVMR;IVPQPPLQK;KIGFEAVMR;KLNCSPDSFR;LMSPTGGR;LNCSPDSFR;LPLGLLLHPFR;MIHPNLYR;NILPMTPVWAPVPNLNADLKK;SFITWLR;SQPLVHLMK;SSPVVSTVLSGSSGSSSTR;TPPTANHPVEPVTSVTQPSELLQQK;TYINPFVSFIDQR;VNDVPEEFMYNPLTR;VSVFQTQLPSLGAGLLQSR;VVQHLGPATDFYK;VVQHLGPATDFYKK;VYAMCQIK;YSAGCIYYYPSFHY…	1;0;1;1;1;1;1;1;1;0;1;0;1;0;1;1;1;1;1;1;1;1;1;1;1;1;1;1;1	25	71	0.265	363193;363188;363191;78843;78842;529186;529184;529183;529198;479298;506304;506308;506303;506860;506310;403467;403468;403470;674794;674798;674797;674785;674793;674801;439341;439351;439348;439337;439335;439344;439343;439342;439301;439792;494952;494986;494969;95130;142088;155555;155554;258607;47601;47634;179790;288445;160320;151548;160319;733649;95218;156803;156804;156808;164804;156751;156749;559859…	-	Protein transport protein Sec24B OS=Homo sapiens GN=SEC24B PE=1 SV=2
5507_1	sp|Q9BSQ5|CCM2_HUMAN	9.91411	0.000204499	48806.6	VPIHDIAAVSYVR;YLGQLTSIPGYLNPSSR	1;1	2	3	0.0676	383459;383458;594414	-	Cerebral cavernous malformations 2 protein OS=Homo sapiens GN=CCM2 PE=1 SV=1
1423_1	sp|O95298|NDUC2_HUMAN	11.4656	0.000204499	14178.4	EMFGYMK;LHPEDFPEEDKK;RNPEPLR;TYGEIFEK	1;1;1;1	4	4	0.2857	87349;407914;77509;125193	-	NADH dehydrogenase [ubiquinone] 1 subunit C2 OS=Homo sapiens GN=NDUFC2 PE=1 SV=1
7949_1	sp|Q96GS4|BORC6_HUMAN	12.6079	0.000204499	37203.6	ALQPVQGLAR;DAVDSLGEAVDMSIK;EALENEPGPQGTLSGAGSR	1;1;1	3	3	0.1232	156847;443745;595951	-	BLOC-1-related complex subunit 6 OS=Homo sapiens GN=BORCS6 PE=1 SV=2
2841_1	sp|Q52LJ0|FA98B_HUMAN	37.5439	0	37167	EMACPYSVLISGDIK;INDALSCEYECR;LDVTVQSFGWSDR;MDLNSEQAEQLER;RLDVTVQSFGWSDR;SLCNLEESITSAGR;STTSDIPHMLNQVESK;TACAINK;TTITMAHLLAAR;VKTDDIAR	1;1;0;1;0;1;1;0;1;1	7	17	0.3364	512834;512835;432352;421805;421818;449975;449976;457973;450324;503680;503676;436994;562067;569016;569017;562566;569489;569498;31550;301445;301444;93545	-	Protein FAM98B OS=Homo sapiens GN=FAM98B PE=1 SV=1
2841_2	sp|Q8NCA5|FA98A_HUMAN	40.2009	0	55366.3	AQEGGGSEVFQELK;GGRPNEIEPPPPEMPPWQK;GPLLEDGALSQAVSAGASSPEFTK;IEAINQAIANEYEVR;KAQEGGGSEVFQELK;LDVTVQSFGWSDR;LKETLAK;MLCVNAPPK;RLDVTVQSFGWSDR;TACAINK;TTISVAHLLAAR	1;1;1;1;1;0;1;1;0;0;1	8	17	0.2351	405605;405606;688729;688731;688955;733920;538138;538608;472766;421805;421818;41201;41209;146254;503680;503676;31550;275531;275530;275533;275532;275534	-	Protein FAM98A OS=Homo sapiens GN=FAM98A PE=1 SV=1
1969_1	sp|Q53H96|P5CR3_HUMAN	33.3255	0	28644.9	AATMSAVEAATCR;IAAQTLLGTAK;LLQHLLEACGR;MAGAIAQGLIR;MLLHEGQHPAQLR;SDVCTPGGTTIYGLHALEQGGLR;VEAQHILASAPTDR	1;1;1;1;1;1;1	7	11	0.3504	325017;325015;174288;174291;174290;308126;192282;433572;748672;420893;420899	-	Pyrroline-5-carboxylate reductase 3 OS=Homo sapiens GN=PYCRL PE=1 SV=3
3882_1	sp|Q9Y625|GPC6_HUMAN	6.11616	0.00351617	62694.9	TFVQGLTVGR	1	1	1	0.018	168801	-	Glypican-6 OS=Homo sapiens GN=GPC6 PE=1 SV=1
3204_1	sp|Q9UPP1|PHF8_HUMAN	6.11616	0.00351617	117790	SSGSSSSGLGTVSNSPASQR	1	1	1	0.0189	589092	-	Histone lysine demethylase PHF8 OS=Homo sapiens GN=PHF8 PE=1 SV=3
4072_1	sp|Q07960|RHG01_HUMAN	70.4082	0	50404.2	AINPINTFTK;ALYIVHPTMFIK;DAAITLK;ETVAYLQAHALTTEGIFR;FLLDHQGELFPSPDPSGL;HQIVEVAGDDK;HQIVEVAGDDKYGR;IIVFSACR;LLGYLK;MPPSHQLDHSK;NPEQEPIPIVLR;NWPSDEMPDFPK;SANTQVVR;SSSPELVTHLK;VPATLQVLQTLPEENYQVLR;YDDFLK	1;1;1;1;1;1;1;1;1;1;1;1;1;1;1;1	16	36	0.3941	193852;193842;193843;379428;14771;649691;649696;649673;649951;633318;633317;633320;633322;633315;633323;251836;462104;115923;3961;3934;3960;288687;288678;288680;363485;363486;396711;74145;243865;243872;728933;728932;728934;728935;728931;40066	-	Rho GTPase-activating protein 1 OS=Homo sapiens GN=ARHGAP1 PE=1 SV=1
3544_1	sp|P62306|RUXF_HUMAN	19.2608	0.000204499	9718.78	CNNVLYIR;GVEEEEEDGEMR;GVEEEEEDGEMRE;LKWGMEYK	1;1;1;1	4	19	0.3372	155998;155982;156477;155999;155978;365650;437390;437391;437393;437396;437394;445285;437389;445282;445284;445283;437388;157656;157652	-	Small nuclear ribonucleoprotein F OS=Homo sapiens GN=SNRPF PE=1 SV=1
5555_1	sp|P62256|UBE2H_HUMAN	13.0504	0.000204499	20642.1	FYGPQGTPYEGGVWK;HEVTILGGLNEFVVK;VDLPDKYPFK	1;1;1	3	3	0.2186	514361;498213;257892	-	Ubiquitin-conjugating enzyme E2 H OS=Homo sapiens GN=UBE2H PE=1 SV=1
6028_1	sp|Q9BQA1|MEP50_HUMAN	31.4528	0	36701.1	AHAAQVTCVAASPHKDSVFLSCSEDNR;ETPPPLVPPAAR;FCKYEHDDIVSTVSVLSSGTQAVSGSK;KETPPPLVPPAAR;SDGALLLGASSLSGR;VWDLAQQVVLSSYR;YEHDDIVSTVSVLSSGTQAVSGSK	1;1;1;1;1;1;1	7	9	0.2807	827876;270806;270819;822102;344996;362642;503348;502853;759731	-	Methylosome protein 50 OS=Homo sapiens GN=WDR77 PE=1 SV=1
7650_1	sp|Q9BQI0|AIF1L_HUMAN	7.93231	0.000581846	17056.6	DFVNMMLGK;LVMMFEGK	1;1	2	2	0.1133	157585;109798	-	Allograft inflammatory factor 1-like OS=Homo sapiens GN=AIF1L PE=1 SV=1
4535_1	sp|Q96RS6|NUDC1_HUMAN	7.93701	0.000581846	66713.3	HDVDALLWQPHSSK;LFVLTTK;QVGQVAK	1;1;1	3	3	0.048	486203;49201;13799	-	NudC domain-containing protein 1 OS=Homo sapiens GN=NUDCD1 PE=1 SV=2
1428_2	sp|Q5T4S7|UBR4_HUMAN	250.398	0	573476	AEHASSLLELASTTK;ALATNPALR;ALGTLGMTTNEK;ALSVLGCGHTSSTK;APSYIEIFGR;AQQALSELHTVEK;AVEILR;AYLLQNFNEEGTTEKPSK;CSASVPANPGVCGNCGENVYQCHK;DCHVLTFSSSGSVSDHLVLHPQLATGNFIIK;DNPEATQQMNDLIIGK;EPTYQLNIHDIK;GLAIQHPGTQVLIGTDSIPNLHK;GWETDGPPAALSIMAQSTSIQR;HFSSDAVPHPR;HLILLIK;IIPYLSFGEVEK;IISLDLPVAEVYK;IISLDLPVAEVYKK;ILGPAESDEFLAR;IQIGTQAIER;ISSYVNWIK;KVPTSNTEGGWSCSLAEYIR;LCTFTITQK;LDRTEIITFTAMMK;LFQLTEK;LLLIWQHK;…	1;1;1;1;1;1;1;1;1;1;1;1;1;1;1;1;1;1;1;1;1;1;1;1;1;1;1;1;1;1;1;1;1;1;1;1;1;1;1;1;1;1;1;1;1;1;1;1;1;1;1;1;1;1;1;1;1;1	58	83	0.154	447738;447732;447767;447729;96414;264797;370899;216037;391408;931;951;664918;664905;792898;792899;793013;793012;860862;562081;400861;750382;750204;730075;273624;62115;357606;394938;462892;462894;371028;370962;200438;200481;188517;715341;189453;505726;76468;155679;171313;171304;109033;79809;354747;354748;354743;405123;614701;614736;693916;357818;184156;644537;522122;304010;303944;248200;248198;342…	-	E3 ubiquitin-protein ligase UBR4 OS=Homo sapiens GN=UBR4 PE=1 SV=1
5817_1	sp|Q14534|ERG1_HUMAN	22.9971	0.000204499	63882.4	ANHAELILANPSPVLIYQISSSETR;ELHAPLTVVADGLFSK;IVGEFLQPGGYHVLK;IYPQIPDHLKEPFLEATDNSHLR;SEVQIPYPLSENNQVQSGR	1;1;1;1;1	5	6	0.1707	800395;519988;499062;499064;801914;686355	-	Squalene monooxygenase OS=Homo sapiens GN=SQLE PE=1 SV=3
3365_1	sp|P02730|B3AT_HUMAN	79.3166	0	101727	AAATLMSER;ADFLEQPVLGFVR;ASTPGAAAQIQEVK;ATFDEEEGRDEYDEVAMPV;FIFEDQIRPQDR;FIFEDQIRPQDREELLR;GWVIHPLGLR;HSHAGELEALGGVKPAVLTR;IDAYMAQSR;IPPDSEATLVLVGR;LQEAAELEAVELPVPIR;LSVPDGFK;SVTHANALTVMGK;VIGDFGVPISILIMVLVDFFIQDTYTQK;VLLPLIFR;YQSSPAKPDSSFYK	1;1;1;1;1;1;1;1;1;1;1;1;1;1;1;1	16	49	0.2338	107322;411651;411658;411655;411649;343868;343851;344412;701333;450530;450543;450531;450565;702073;702066;212375;212377;212376;656576;656616;656581;656624;157582;398883;398886;398884;398881;398888;398885;398891;398880;398889;398890;398877;398887;398875;398865;398878;398892;398866;598937;68051;319968;319956;328632;845887;118139;471748;471736	-	Band 3 anion transport protein OS=Homo sapiens GN=SLC4A1 PE=1 SV=3
7616_1	sp|O75380|NDUS6_HUMAN	30.6107	0	13702.8	EVNENFAIDLIAEQPVSEVETR;QKEVNENFAIDLIAEQPVSEVETR;TGTCGYCGLQFR;VIACDGGGGALGHPK;VTHTGQVYDDKDYR;VYINLDKETK	1;1;1;1;1;1	6	21	0.6048	766454;766443;805406;805448;371890;371895;371888;365887;365881;365882;365889;365878;365894;365886;365864;365891;519694;519695;258406;258398;258402	-	NADH dehydrogenase [ubiquinone] iron-sulfur protein 6, mitochondrial OS=Homo sapiens GN=NDUFS6 PE=1 SV=1
4673_1	sp|Q9P2K8|E2AK4_HUMAN	15.1335	0.000204499	186794	HSFINPQPK;IFVLNQLR;LQTSLANLHQK;VLSASNVLVDAEGTVK	1;1;1;1	4	5	0.0267	164410;133977;275429;470841;471202	-	eIF-2-alpha kinase GCN2 OS=Homo sapiens GN=EIF2AK4 PE=1 SV=3
840_1	sp|P48728|GCST_HUMAN	79.1229	0	43917.6	AAMDFPGAK;AHSPILNMEGTK;DLALMQDK;DSHTDSHLHTR;IGTVTSGCPSPSLK;MPFVPTNYYTLK;MVAFAGWSLPVQYR;QHCSLFDVSHMLQTK;QQMAVVSK;RAAMDFPGAK;RTPLYDFHLAHGGK;RVGLMCEGAPMR;TPLYDFHLAHGGK;VGLMCEGAPMR;VIVPQLK;VRELQNQGR	1;1;1;1;1;1;1;1;1;1;1;1;1;1;1;1	16	77	0.3623	88715;88713;95330;300637;300625;300644;310054;300641;310057;300631;310049;310058;99837;99839;107252;305413;305412;305408;362472;362473;362456;362408;402302;410901;410893;402298;410879;490347;490354;481857;481837;481855;481846;481852;481853;481854;490332;580397;580405;580398;587187;580392;580399;580394;580366;586783;580402;580395;586785;80593;80596;162462;162460;475216;475217;475220;475218;346771;…	-	Aminomethyltransferase, mitochondrial OS=Homo sapiens GN=AMT PE=1 SV=1
7867_1	sp|Q92692|NECT2_HUMAN	29.7307	0	57705.9	AEQVIFVR;LSFVSAK;MARAAALLPSR;MGPSFPSPKPGSER;VEHESFEEPALIPVTLSVR;VQVLPEVR;VTFSQDPTTVALCISK	1;1;1;1;1;1;1	7	10	0.1543	114076;21721;218280;402213;402203;687802;687789;687791;102521;554069	-	Nectin-2 OS=Homo sapiens GN=NECTIN2 PE=1 SV=1
6189_1	sp|Q9Y2U9|KLDC2_HUMAN	10.3385	0.000204499	46069.3	AAHACATVGNR;GLYDFYLPR;HLLHSVNQR	1;1;1	3	4	0.0714	199495;199491;209785;184825	-	Kelch domain-containing protein 2 OS=Homo sapiens GN=KLHDC2 PE=1 SV=1
576_2	sp|P10114|RAP2A_HUMAN	10.5025	0.000204499	20602.3	VPVILVGNK;VPVILVGNKVDLESER;VVVLGSGGVGK;YDPTIEDFYR;YDPTIEDFYRK	1;1;0;0;0	2	2	0.2077	102214;553798;118553;118529;118538;118547;118551;313415;313411;387231;387198	-	Ras-related protein Rap-2a OS=Homo sapiens GN=RAP2A PE=1 SV=1
576_3	sp|Q9Y3L5|RAP2C_HUMAN	17.2328	0.000204499	20731.4	ALAQEWGCPFMETSAK;QMNYSSLPEK;VDLEPEREVMSSEGR;VPLILVGNKVDLEPER;VVVLGSGGVGK;YDPTIEDFYR;YDPTIEDFYRK	1;1;1;1;0;0;0	4	7	0.3934	584836;578442;584844;243200;538013;564283;564282;118553;118529;118538;118547;118551;313415;313411;387231;387198	-	Ras-related protein Rap-2c OS=Homo sapiens GN=RAP2C PE=1 SV=1
576_1	sp|P61225|RAP2B_HUMAN	9.27734	0.000204499	20491.2	SALTVQFVTGSFIEK;VPMILVGNK;VVVLGSGGVGK;YDPTIEDFYR;YDPTIEDFYRK	1;1;0;0;0	2	4	0.2514	483053;483001;118089;118095;118553;118529;118538;118547;118551;313415;313411;387231;387198	-	Ras-related protein Rap-2b OS=Homo sapiens GN=RAP2B PE=1 SV=1
6146_1	sp|P35542|SAA4_HUMAN	12.3379	0.000204499	14737.3	AYWDIMISNHQNSNR;GNYDAAQR;GPGGVWAAK	1;1;1	3	8	0.2462	587623;587625;587631;593819;81845;58195;58196;58186	-	Serum amyloid A-4 protein OS=Homo sapiens GN=SAA4 PE=1 SV=2
3586_1	sp|Q15269|PWP2_HUMAN	27.4373	0	102387	EGDFNNLTAAAFHK;FSNLLGTVYR;LVQEALEAVPR;SVLASASWDK;VLFDPFELDTSVTPGR;VTVFDLK	1;1;1;1;1;1	6	8	0.074	436323;226442;259223;259227;162490;565071;565064;49130	-	Periodic tryptophan protein 2 homolog OS=Homo sapiens GN=PWP2 PE=2 SV=2
1035_1	sp|P55072|TERA_HUMAN	212.259	0	89265.7	AIANECQANFISIK;DHFEEAMR;DVDLEFLAK;EAVCIVLSDDTCSDEK;EDEEESLNEVGYDDIGGCR;EDEEESLNEVGYDDIGGCRK;ELQELVQYPVEHPDK;ELQELVQYPVEHPDKFLK;EMVELPLR;EMVELPLRHPALFK;ESIESEIR;ESIESEIRR;ETVVEVPQVTWEDIGGLEDVKR;EVDIGIPDATGR;FGMTPSK;GDDLSTAILK;GDIFLVR;GGNIGDGGGAADR;GILLYGPPGTGK;GPELLTMWFGESEANVR;GVLFYGPPGCGK;HPALFK;IVSQLLTLMDGLK;KGDIFLVR;KYEMFAQTLQQSR;LAGESESNLR;LAGESESNLRK;LDQLIYIPLPDEK;LEILQIHTK;LGDVISIQPCPDVK;LI…	1;1;1;1;1;1;1;1;1;1;1;1;1;1;1;1;1;1;1;1;1;1;1;1;1;1;1;1;1;1;1;1;1;1;1;1;1;1;1;1;1;1;1;1	44	153	0.5546	458153;458165;458171;458145;458167;458193;148309;154850;154825;154848;154849;584545;584543;584539;584541;584544;584548;697601;729453;577987;577968;577993;578004;577985;577973;704346;704635;704344;704343;704345;704638;704347;125304;125306;511520;511519;511517;511525;511514;519478;519482;114263;193631;765664;765658;765836;765661;765665;765666;765837;765830;269247;269267;27788;27787;33185;147863;147…	-	Transitional endoplasmic reticulum ATPase OS=Homo sapiens GN=VCP PE=1 SV=4
5379_1	sp|Q86WU2|LDHD_HUMAN	89.1861	0	54835.7	AFAEQLGR;ALALHGTCTGEHGIGMGK;ALALHGTCTGEHGIGMGKR;ALNAHLR;AVLDPQGLMNPGK;AVVGGSHVSTAAVVR;CEPPDAVVWPQNVEQVSR;DFVEALK;DNVLNLEVVLPDGR;GYSTDVCVPISR;ILELNQEDFSVVVEPGVTR;ILELNQEDFSVVVEPGVTRK;LLHTAGR;LPEIVVQTK;QLLQEEVGAVGVETMR;RALALHGTCTGEHGIGMGK;TEEIVQQNGASDFSWAK	1;1;1;1;1;1;1;1;1;1;1;1;1;1;1;1;1	17	43	0.3609	80869;80875;572160;572157;632528;632524;632522;632519;37684;37686;325794;334983;325802;334981;325793;334976;366711;366712;366713;366710;366714;676530;49001;445193;333534;333537;333535;685925;686180;685920;686181;719846;27906;27908;27905;27910;145192;556924;550012;550023;632537;637285;611652	-	Probable D-lactate dehydrogenase, mitochondrial OS=Homo sapiens GN=LDHD PE=1 SV=1
635_1	sp|Q6ULP2|AFTIN_HUMAN	16.1091	0.000204499	102137	LLSSLGIDTR;TDENIDTPGTPK;VIAGLPDLTFMHAK;VLMFPATLTPSTSSQEK	1;1;1;1	4	4	0.0566	167290;294850;423676;583291	-	Aftiphilin OS=Homo sapiens GN=AFTPH PE=1 SV=2
2544_1	sp|Q16527|CSRP2_HUMAN	28.6818	0	20939.9	GYGYGQGAGTLNMDR;KNLDSTTVAIHDEEIYCK;NLDSTTVAIHDEEIYCK;PVWGGGNK;TVYHAEEVQCDGR	1;1;1;1;1	5	11	0.2798	448406;448414;448404;683635;645608;645902;45420;45415;45421;450314;450316	-	Cysteine and glycine-rich protein 2 OS=Homo sapiens GN=CSRP2 PE=1 SV=3
5330_1	sp|P86791|CCZ1_HUMAN	47.9985	0	55830.2	AEMPGNLQHYGR;AMSDYWVVGK;ELYVILNQK;FIYFNHMNLAEK;FLTGPLNLNDPDAK;ILFYHPNEVEK;ILGDINSDFTR;IQSFINR;LFNGTFLK;NVGLCEAIVQFTR;TPSVSLTSVHPDLMK;VDEDEEIIVK	1;1;1;1;1;1;1;1;1;1;1;1	12	19	0.2739	344671;217462;194361;431011;431004;431558;424600;425691;354042;354046;354119;274305;75957;102476;102472;420271;420269;475213;238515	sp|P86790|CCZ1B_HUMAN	Vacuolar fusion protein CCZ1 homolog OS=Homo sapiens GN=CCZ1 PE=1 SV=1
8062_1	sp|Q14353|GAMT_HUMAN	40.5916	0	26301.1	ILGKPVMER;TEVMALVPPADCR;VLEVGFGMAIAASK;VQEAPIDEHWIIECNDGVFQR;WETPYMHALAAAASSK;YYAFPQMITPLVTK;YYAFPQMITPLVTKG	1;1;1;1;1;1;1	7	23	0.3729	151306;151303;151284;160036;393855;393852;402923;402924;366046;366051;776552;776546;776381;776384;776551;538481;507278;507897;507292;507288;536037;536035;536036	-	Guanidinoacetate N-methyltransferase OS=Homo sapiens GN=GAMT PE=1 SV=1
801_1	sp|P43694|GATA4_HUMAN	6.11616	0.00351617	44537.5	VGLSCANCQTTTTTLWR	1	1	1	0.0385	633590	-	Transcription factor GATA-4 OS=Homo sapiens GN=GATA4 PE=1 SV=2
2004_1	sp|Q9UBB4|ATX10_HUMAN	78.0232	0	53454.8	AEGDISNVANGFK;ALTALFK;CGLQFLGNIASR;DDIPVFLR;ELRVEQESLLTAFR;ETTNIFSNCGCVR;HAELIASTFVDQCK;ITSDEPLTKDDIPVFLR;LASEEPPDDEEALATIR;LSGVMVPAPIQDLEALR;NACIECSVNQNSIR;NLTEDNSQNQDLIAK;SPELVQAMFPK;VEQESLLTAFR;VGFEVEK;VLDILKK	1;1;1;1;1;1;1;1;1;1;1;1;1;1;1;1	16	31	0.3747	315238;26900;26882;26883;26892;323755;323731;323789;323772;119787;119799;517433;447503;447502;478703;478699;478687;629712;629722;629714;629717;590278;590302;571989;503064;503496;522935;271861;297872;42951;51869	-	Ataxin-10 OS=Homo sapiens GN=ATXN10 PE=1 SV=1
2803_1	sp|O43402|EMC8_HUMAN	23.1133	0.000204499	23757.7	FTMDCVAPTIHVYEHHENR;IAEGFSDTALIMVDNTK;LTTQAYCK;SYETLVDFDNHLDDIR;VKDASPNQVAEK;YPHCAVNGLLVAEK	1;1;1;1;1;1	6	9	0.4095	739596;578236;578232;578573;124418;626919;293581;453979;453982	-	ER membrane protein complex subunit 8 OS=Homo sapiens GN=EMC8 PE=1 SV=1
3165_1	sp|P54802|ANAG_HUMAN	41.2601	0	82213.6	AAAVSEAEADFYEQNSR;ALAAKPGLDTYSLGGGGAAR;AVLGAVPR;DFCGCHVAWSGSQLR;LLLTSAPSLATSPAFR;SDVFEAWR;SFGMTPVLPAFAGHVPEAVTR;YDLLDLTR;YGVSHPDAGAAWR	1;1;1;1;1;1;1;1;1	9	13	0.1696	590935;590938;586650;33129;558963;492566;492567;492563;136866;696771;136611;352746;352739	-	Alpha-N-acetylglucosaminidase OS=Homo sapiens GN=NAGLU PE=1 SV=2
3840_1	sp|P52209|6PGD_HUMAN	75.9309	0	53106	AGQAVDDFIEK;AQADIALIGLAVMGQNLILNMNDHGFVVCAFNR;CLSSLKDER;FQFDGDKK;GILFVGSGVSGGEEGAR;HEMLPASLIQAQR;IISYAQGFMLLR;LVPLLDTGDIIIDGGNSEYR;LVPLLDTGDIIIDGGNSEYRDTTR;SFLEDIR;SFLEDIRK;TIFQGIAAK;VDDFLANEAK;VGTGEPCCDWVGDEGAGHFVK;VVGAQSLK;YGPSLMPGGNK	1;1;1;1;1;1;1;1;1;1;1;1;1;1;1;1	16	63	0.4017	240969;871596;187080;187069;124416;465048;465112;465047;465087;465026;413340;413350;413323;413333;413336;413327;413328;421926;413325;421958;421927;421923;376747;376746;689854;689862;689853;689860;689849;689876;689870;689890;689852;689868;689895;689848;690103;689859;689850;690092;788903;788905;788907;788902;788906;789024;76700;76701;136183;107117;107138;195588;720952;720950;720951;40728;40759;1945…	-	6-phosphogluconate dehydrogenase, decarboxylating OS=Homo sapiens GN=PGD PE=1 SV=3
1075_1	sp|Q9NX05|F120C_HUMAN	9.86808	0.000204499	120511	AHQLVLPPCDVVIK;QTAQLIVGHVGNK;SPQTPELVSALTFR	0;1;1	2	2	0.0374	463539;463507;340569;441822	-	Constitutive coactivator of PPAR-gamma-like protein 2 OS=Homo sapiens GN=FAM120C PE=2 SV=3
4048_1	sp|Q9NVE7|PANK4_HUMAN	68.5815	0	85937	AVASQPDSVDAAER;AVSAVLESDPYFGFEEAKR;DVYGGAHQTLGLSGNLIASSFGK;EHCLNEFNFPDPYSK;FDELLHLASR;GEVQALFLR;GLLAGNVFDWGAK;GQHSNVDMLVR;GTEVILACNSGPALNDVTHSESLIVAER;LFSVIFK;LLLVQTGSSSPCLDLSR;NAWLAER;QQPFAYGTLTVR;VIQATGGGAYK;VYFGGFFIR	1;1;1;1;1;1;1;1;1;1;1;1;1;1;1	15	21	0.2652	369808;677873;677872;724707;606210;245653;245666;147921;330292;276774;276763;827705;63995;63994;586654;586645;586945;66690;349668;163095;186043	-	Pantothenate kinase 4 OS=Homo sapiens GN=PANK4 PE=1 SV=1
100_1	sp|P13284|GILT_HUMAN	6.11616	0.00351617	27945	GMQLMHANAQR	1	1	7	0.044	295262;277220;285858;285853;277223;295261;277645	-	Gamma-interferon-inducible lysosomal thiol reductase OS=Homo sapiens GN=IFI30 PE=1 SV=3
4842_1	sp|Q2TAY7|SMU1_HUMAN	93.8319	0	57507.2	AAIAQALAGEVSVVPPSR;DSSQILSASFDQTIR;DTEMLATGAQDGK;DVEEEKFPTQLSR;DVIGIAHHPHQNLIATYSEDGLLK;EGGDFVCCALSPR;GHSSFVNEATFTQDGHYIISASSDGTVK;GVTCLSFSK;IQSGQCLR;LIMQYLK;LMALLGQALK;NPEHFVVCNR;QTDPMIMLK;SFSSGKR;SLGSTAGTDITVNSVILLPK;SNTVVIMNMQGQIVR;TLKEFR;YIHLENLLAR	1;1;1;1;1;1;1;1;1;1;1;1;1;1;1;1;1;1	18	113	0.4581	539662;539654;539655;539660;539647;539656;539666;539650;539642;539639;539651;539659;540082;504674;504657;504676;504666;504672;504667;324021;332912;457634;457619;789861;789859;789862;789974;789972;789858;789860;789979;790150;398967;398968;398971;827744;827745;827812;827881;827882;827877;131744;131745;131741;131743;113850;113851;113841;113843;89412;89415;89411;89416;95835;89410;95834;95836;159618;1…	-	WD40 repeat-containing protein SMU1 OS=Homo sapiens GN=SMU1 PE=1 SV=2
6237_1	sp|Q7RTV0|PHF5A_HUMAN	21.4445	0.000204499	12397	CVICDSYVRPCTLVR;CVICGGPGVSDAYYCK;HHPDLIFCR;ICDECNYGSYQGR;IVNLGSSK	1;1;1;1;1	5	12	0.5545	606593;570445;242227;242219;242229;242208;480049;480048;47253;47256;47254;47250	-	PHD finger-like domain-containing protein 5A OS=Homo sapiens GN=PHF5A PE=1 SV=1
7152_1	sp|Q6IA69|NADE_HUMAN	22.239	0.000204499	79233.6	HICTPR;MALANEGNYR;MIQDLTK;NGGIYLLANQK;SPLFAAHGGSSR;VDLVTMVTSK;VIFLNR	1;1;1;1;1;1;1	7	10	0.0878	33231;207059;216931;61399;239862;237184;237170;237168;178128;26093	-	Glutamine-dependent NAD(+) synthetase OS=Homo sapiens GN=NADSYN1 PE=1 SV=3
6041_2	sp|P48960|CD97_HUMAN	19.3151	0.000204499	91809.1	GGHWATEGCQVLGSK;HGIPNNQK;LVDELMEAPGDVEALAPPVR;TSSAEVTIQNVIK;VCTDVNECTSGQNPCHSSTHCLNNVGSYQCR	1;1;1;1;1	5	7	0.1042	461937;461929;88816;679794;354694;355240;872518	-	CD97 antigen OS=Homo sapiens GN=CD97 PE=1 SV=4
8190_1	sp|Q8WVP5|TP8L1_HUMAN	6.11616	0.00351617	20814.1	DLLHQAVGPHLTAK	1	1	3	0.0753	416506;416505;416500	-	Tumor necrosis factor alpha-induced protein 8-like protein 1 OS=Homo sapiens GN=TNFAIP8L1 PE=1 SV=2
3465_1	sp|Q96BP2|CHCH1_HUMAN	16.7333	0.000204499	13466	EIQGFLDCAAR;SIQETLGESGSLLPNK;SIQETLGESGSLLPNKLNK	1;1;1	3	7	0.2542	290507;507879;507880;507854;507870;652175;652460	-	Coiled-coil-helix-coiled-coil-helix domain-containing protein 1 OS=Homo sapiens GN=CHCHD1 PE=1 SV=1
842_1	sp|Q641Q2|WAC2A_HUMAN	16.135	0.000204499	147095	DLYIDRPLPYLIGSK;GIWKPETPQDSSGLAPFK;LTDEDFSPFGSGGGLFSGGK;QVDGLIR;SHGLESVPVLPGSGEAGVSFDLPAQADTLHSANK	1;1;1;1;1	5	5	0.0701	551866;629681;635063;40189;861262	-	WASH complex subunit 2A OS=Homo sapiens GN=WASHC2A PE=1 SV=3
2840_1	sp|Q92544|TM9S4_HUMAN	10.5025	0.000204499	74469.7	KCEVLCSQSNKPVTLTVEQSR;TNQIPR;TQLPYEYYSLPFCQPSK	1;0;1	2	2	0.0685	759070;13032;679729	-	Transmembrane 9 superfamily member 4 OS=Homo sapiens GN=TM9SF4 PE=1 SV=2
7193_1	sp|Q8NEZ5|FBX22_HUMAN	17.0671	0.000204499	44479.8	AANIPEHNTIGFMFACVGR;STFVLSNLAEVVER;VACVCR;VLTFLPAK	1;1;1;1	4	4	0.1166	675328;450643;26988;80182	-	F-box only protein 22 OS=Homo sapiens GN=FBXO22 PE=1 SV=1
2840_2	sp|Q99805|TM9S2_HUMAN	18.8203	0.000204499	75725.5	FCNPGFPIGCYITDK;IYYHVVETGSMGAR;LEFLKK;NAIEHPVR;RPSENLGQVLFGER;TNQIPR	1;1;1;1;1;0	5	6	0.095	562985;460119;460121;31698;100875;470801;13032	-	Transmembrane 9 superfamily member 2 OS=Homo sapiens GN=TM9SF2 PE=1 SV=1
8603_1	sp|Q7Z6K5|ARPIN_HUMAN	8.30551	0.00039093	24927.5	GNEIEPNFSATR;LPGAWDPAAHQGGNGVLLEGELIDVSR	1;1	2	4	0.1726	323121;806856;806851;807022	-	Arpin OS=Homo sapiens GN=ARPIN PE=1 SV=1
4131_1	sp|Q16563|SYPL1_HUMAN	9.66216	0.000204499	28546.7	IATGHNIIDELPPCK;TVTATFGYPFR	1;1	2	4	0.1004	510455;510453;510465;278616	-	Synaptophysin-like protein 1 OS=Homo sapiens GN=SYPL1 PE=1 SV=1
6629_1	sp|P00167|CYB5_HUMAN	34.943	0	15320.5	EQAGGDATENFEDVGHSTDAR;FLEEHPGGEEVLR;FLEEHPGGEEVLREQAGGDATENFEDVGHSTDAR;STWLILHHK;TFIIGELHPDDRPK;VYDLTK;YYTLEEIQK	1;1;1;1;1;1;1	7	372	0.5373	702461;702500;702805;702484;702488;702492;702435;702485;702791;702468;702503;702792;702789;702467;702463;702505;702431;702487;702473;702788;702444;702812;702496;702449;702477;702433;702494;702510;702458;702495;702507;702816;702808;702471;702483;703135;702800;702813;703139;702501;703141;702807;702493;702465;702457;702481;702798;702464;702508;702497;702470;702486;702462;702437;702448;702475;702442;…	-	Cytochrome b5 OS=Homo sapiens GN=CYB5A PE=1 SV=2
4429_1	sp|Q8N3V7|SYNPO_HUMAN	33.9214	0	99402.1	AASPAKPSSLDLVPNLPK;APAPQPPSLPDR;ASPAAAEEVVPEWASCLK;TARPFGIQAPGGTSQMER;VSTPATTTSTFSR;VTPNPDLLDLVQTADEK;YPTNAPGAFR	1;1;1;1;1;1;1	7	12	0.1141	570399;271200;271202;271220;271219;271211;613577;609419;615644;334891;595333;178525	-	Synaptopodin OS=Homo sapiens GN=SYNPO PE=1 SV=2
4040_1	sp|P53609|PGTB1_HUMAN	17.3934	0.000204499	42340.7	AITYIR;GSSYLGIPFNPSK;IFQYTNFEK;LLDLHQSWK;NYILSTQDR	1;1;1;1;1	5	5	0.122	16648;341527;239013;207843;188344	-	Geranylgeranyl transferase type-1 subunit beta OS=Homo sapiens GN=PGGT1B PE=1 SV=2
5470_1	sp|Q9BQG2|NUD12_HUMAN	60.7167	0	52042.7	AIAHQLIK;ESFQQPEVR;FCPTCGNATK;HIANLLATAK;KPWFLTNEVEECENYFSK;LCLKEDCPSLNGVHNTSYPR;LCQLNYTDIK;LCQLNYTDIKDYLAQPEK;NGHPEIVQFLLEK;NNSDWLLAK;QQAFFVPPSR;SLKQEIVTQFHCSAAEGDIAK;SVLAWHSR;VDPVVIMQVIHPDGTK	1;1;1;1;1;1;1;1;1;1;1;1;1;1	14	23	0.368	81793;194082;217393;156243;730963;731139;730962;740132;283116;704533;704531;430090;430087;430094;430089;161042;231113;733913;110472;544953;544959;544960;545456	-	Peroxisomal NADH pyrophosphatase NUDT12 OS=Homo sapiens GN=NUDT12 PE=1 SV=1
5169_1	sp|Q9HCN4|GPN1_HUMAN	21.1674	0.000204499	41713.7	DSLSPVLHPSDLILTR;FDQVMK;HPVCLLVLGMAGSGK;KSLANAESQQQR;TTFVQR	1;1;1;1;1	5	8	0.1471	551880;551875;27789;438279;438302;337321;21666;21672	-	GPN-loop GTPase 1 OS=Homo sapiens GN=GPN1 PE=1 SV=1
8576_1	sp|P43490|NAMPT_HUMAN	112.848	0	55486.6	AVPEGFVIPR;DLLNCSFK;DPVPGYSVPAAEHSTITAWGK;DPVPGYSVPAAEHSTITAWGKDHEK;DVYKEHFQDDVFNEK;EHFQDDVFNEK;GTDTVAGLALIK;GTDTVAGLALIKK;GVSSQETAGIGASAHLVNFK;GWNYILEK;KFPVTENSK;LHDFGYR;LLPPYLR;MWSIENIAFGSGGGLLQK;NAQLNIELEAAHH;STQAPLIIRPDSGNPLDTVLK;SYSFDEIRK;TPAGNFVTLEEGK;VIQGDGVDINTLQEIVEGMK;VLEILGK;YDGHLPIEIK;YLLETSGNLDGLEYK;YYGTKDPVPGYSVPAAEHSTITAWGK	1;1;1;1;1;1;1;1;1;1;1;1;1;1;1;1;1;1;1;1;1;1;1	23	91	0.5153	172743;172739;172757;172740;172733;172752;172776;172729;172769;172737;130652;130646;130653;696330;696340;796620;613193;612831;365094;219824;219831;294717;294715;634566;634869;634564;634864;143103;143106;154863;154882;154881;154871;154878;154879;154894;88729;88723;88730;88733;88721;88725;73058;73054;73051;73055;73052;73043;616985;394553;710622;710618;710619;710623;710611;710612;710609;710610;71061…	-	Nicotinamide phosphoribosyltransferase OS=Homo sapiens GN=NAMPT PE=1 SV=1
1351_3	sp|P69892|HBG2_HUMAN	5.07477	0.00805208	16116.3	EFTPEVQASWQK;FFDSFGNLSSASAIMGNPK;GHFTEEDKATITSLWGK;GTFAQLSELHCDK;GTFAQLSELHCDKLHVDPENFK;KVLTSLGDAIK;LHVDPENFK;LLVVYPWTQR;MVTGVASALSSR;VLTSLGDAIK;VNVEDAGGETLGR	0;0;0;0;0;0;0;0;1;0;0	1	1	0.7891	388992;640013;645001;639995;640014;639998;645282;645276;640010;615676;615677;615675;615670;419620;420079;781804;781805;210746;181680;181684;181676;287683;287529;287653;287744;287767;287748;287741;287808;287652;287734;287665;287753;287682;287710;287692;287709;287670;287750;287666;287496;287627;287492;287721;287755;287536;287774;287742;287590;287621;287512;287540;287495;287563;287570;287510;287588;…	-	Hemoglobin subunit gamma-2 OS=Homo sapiens GN=HBG2 PE=1 SV=2
460_1	sp|Q8WTX7|GATL3_HUMAN	5.21749	0.00656644	36252.6	LLFLPR;TQHGPSPTVHPIQSPQNR	1;1	2	2	0.0729	24629;637055	-	GATS-like protein 3 OS=Homo sapiens GN=GATSL3 PE=1 SV=1
1351_5	sp|P68871|HBB_HUMAN	53.7444	0	15988.3	EFTPPVQAAYQK;FFESFGDLSTPDAVMGNPK;FFESFGDLSTPDAVMGNPKVK;GTFATLSELHCDK;GTFATLSELHCDKLHVDPENFR;KVLGAFSDGLAHLDNLK;LHVDPENFR;LLGNVLVCVLAHHFGK;LLVVYPWTQR;SAVTALWGK;SAVTALWGKVNVDEVGGEALGR;VHLTPEEK;VHLTPEEKSAVTALWGK;VLGAFSDGLAHLDNLK;VNVDEVGGEALGR;VVAGVANALAHK;VVAGVANALAHKYH	1;1;1;1;1;0;0;1;0;1;1;0;1;0;1;0;0	10	1482	0.966	348192;348289;348150;348273;348066;348322;348274;348218;348160;348178;348247;348117;348124;348195;348275;348197;348210;348163;348310;348242;348097;348248;348120;348302;348159;348034;348234;348112;348309;348323;348125;348221;348250;348226;348172;348116;348255;348176;348134;348315;348293;348217;348182;348180;348147;348277;348145;348300;348294;348263;348328;348135;348291;348216;348211;348183;348039;…	-	Hemoglobin subunit beta OS=Homo sapiens GN=HBB PE=1 SV=2
1351_4	sp|P02042|HBD_HUMAN	46.1997	0	16045.3	EFTPQMQAAYQK;FFESFGDLSSPDAVMGNPK;GTFSQLSELHCDK;GTFSQLSELHCDKLHVDPENFR;KVLGAFSDGLAHLDNLK;LHVDPENFR;LLGNVLVCVLAR;LLVVYPWTQR;NFGKEFTPQMQAAYQK;TAVNALWGK;VHLTPEEK;VLGAFSDGLAHLDNLK;VNVDAVGGEALGR;VVAGVANALAHK;VVAGVANALAHKYH	1;1;1;1;0;0;1;0;1;1;0;0;1;0;0	8	145	0.9524	384149;384142;384704;384147;384117;384127;393251;384709;393242;393248;393246;384129;393777;393255;384139;393239;393244;393262;384138;393259;384742;393797;384140;384060;384161;393247;384177;384062;384108;384690;393217;657340;657352;657347;657344;657350;662398;657338;657342;657339;662416;662420;662402;657336;657343;662410;657341;662429;657346;662423;662397;657359;657641;657647;657650;662418;662428;…	-	Hemoglobin subunit delta OS=Homo sapiens GN=HBD PE=1 SV=2
3903_1	sp|Q96N23|CFA54_HUMAN	6.35267	0.00317046	351744	QNLIVLPLLALYQYFVSGICQDITR;SVFEVK;THHIDGDTYKPLASNSFMMDLHLELIQAQHR	1;1;1	3	3	0.02	825947;4676;871532	-	Cilia- and flagella-associated protein 54 OS=Homo sapiens GN=CFAP54 PE=2 SV=3
8183_1	sp|Q96DB5|RMD1_HUMAN	56.2514	0	35785.3	AEQVDPNFYSK;AIELNPK;ESEDAELLWR;IANAYIIK;KLLVYEALEYAK;LAAFWLMK;LLVYEALEYAK;LLVYEALEYAKR;LYQLLTQYK;MLFATPPSSTYEK;QIQTEAAQLLTSFSEKN;VEEILEQADYLYESGETEK	1;1;1;1;1;1;1;1;1;1;1;1	12	33	0.3662	300441;33710;33702;272359;88120;88107;88122;383502;383506;383498;383500;122293;130202;130204;309319;399372;226565;226561;409813;401180;401175;409826;401181;409829;610798;713011;713013;713216;713009;713205;713014;713012;713010	-	Regulator of microtubule dynamics protein 1 OS=Homo sapiens GN=RMDN1 PE=1 SV=1
2848_1	sp|P13073|COX41_HUMAN	64.5095	0	19564	AHESVVK;ASWSSLSMDEK;ASWSSLSMDEKVELYR;DHPLPEVAHVK;ESFAEMNR;FKESFAEMNR;HLSASQK;HYVYGPLPQSFDK;HYVYGPLPQSFDKEWVAK;RDHPLPEVAHVK;SEDFSLPAYMDR;SEDFSLPAYMDRR;VNPIQGLASK	1;1;1;1;1;1;1;1;1;1;1;1;1	13	49	0.5444	28479;28471;267725;267726;277128;614301;268607;268614;268612;268622;268620;268621;268609;268629;268615;268637;268594;123750;278101;287089;278093;278097;287092;29016;29011;29012;444242;444236;690867;690863;359235;359243;359241;377919;377922;377920;461921;461919;461927;461926;461928;145118;145130;145104;145114;145125;145131;145124;145151	-	Cytochrome c oxidase subunit 4 isoform 1, mitochondrial OS=Homo sapiens GN=COX4I1 PE=1 SV=1
2678_1	sp|Q7L3T8|SYPM_HUMAN	31.4042	0	53228.1	EYCLGPTHEEAITALIASQK;FGYPFVIIAGK;LGLPFVK;VFQPQNLR;VFQPQNLREDR;VIDQEMQAIGGQK;VNMPSLSPAELWQATNR;VQADVGTIGGTVSHEFQLPVDIGEDR	1;1;1;1;1;1;1;1	8	10	0.2211	709834;252638;30423;133159;361266;370407;370406;613623;613304;802797	-	Probable proline--tRNA ligase, mitochondrial OS=Homo sapiens GN=PARS2 PE=1 SV=1
1737_1	sp|Q8TBZ3|WDR20_HUMAN	11.884	0.000204499	62853.3	AADLSKPIDKR;NSTDSRPVSVTYR;VPFNSQGSNPVR	1;1;1	3	4	0.0633	253854;253848;407149;303216	-	WD repeat-containing protein 20 OS=Homo sapiens GN=WDR20 PE=1 SV=2
6276_1	sp|Q96BR5|COA7_HUMAN	10.0243	0.000204499	25692.1	KSIAACHNVGLLAHDGQVNEDGQPDLGK;LGAYYVTGK;LVDYLEGIRK	1;1;1	3	3	0.2035	826634;118320;248873	-	Cytochrome c oxidase assembly factor 7 OS=Homo sapiens GN=COA7 PE=1 SV=2
5719_1	sp|Q7Z4L5|TT21B_HUMAN	6.11616	0.00351617	150840	LLLQDSQNVEALR	1	1	1	0.0099	416487	-	Tetratricopeptide repeat protein 21B OS=Homo sapiens GN=TTC21B PE=1 SV=2
4427_1	sp|Q93050|VPP1_HUMAN	7.76889	0.000581846	96350.1	FLPFSFEHIR;FVNEVR;MQTNQTPPTYNK	1;1;1	3	3	0.0335	297774;26682;373900	-	V-type proton ATPase 116 kDa subunit a isoform 1 OS=Homo sapiens GN=ATP6V0A1 PE=1 SV=3
7887_1	sp|O96005|CLPT1_HUMAN	16.9479	0.000204499	76048.5	EEASTSLPTKPTQGASSASEPQEAPPKPAEDK;RGPAPQDQAGPGGAPR;SVAHLPWR;VAGIFPR	1;1;1;1	4	5	0.0942	853596;853648;434136;115942;25265	-	Cleft lip and palate transmembrane protein 1 OS=Homo sapiens GN=CLPTM1 PE=1 SV=1
17_1	sp|P62495|ERF1_HUMAN	69.2615	0	49000.1	FGATLEIVTDK;GFGGIGGILR;GNGTSMISLIIPPKDQISR;ILYLTPEQEK;ILYLTPEQEKDK;KVAETAVQLFISGDK;LSVLGAITSVQQR;VNIDFEPFKPINTSLYLCDNK;VNVAGLVLAGSADFK;VPPNGLVVYCGTIVTEEGKEK;YCFGVEDTLK;YFDEISQDTGK;YFDEISQDTGKYCFGVEDTLK	1;1;1;1;1;1;1;1;1;1;1;1;1	13	23	0.3616	241753;106108;651834;263788;263797;404496;404498;472930;472459;344527;344524;344532;344529;344530;771298;395492;395491;395496;724018;262254;303722;768808;769108	-	Eukaryotic peptide chain release factor subunit 1 OS=Homo sapiens GN=ETF1 PE=1 SV=3
7374_1	sp|Q9Y237|PIN4_HUMAN	17.5123	0.000204499	13801	FGYHIIMVEGR;FNEVAAQYSEDK;HILCEK;QGGDLGWMTR	1;1;1;1	4	7	0.2977	315333;315336;324689;315330;360956;39702;205869	-	Peptidyl-prolyl cis-trans isomerase NIMA-interacting 4 OS=Homo sapiens GN=PIN4 PE=1 SV=1
6483_1	sp|Q96AQ8|MCUR1_HUMAN	26.7034	0.000204499	39669.1	IKLELHQLK;KIETEVAGLK;SEFSALR;TEIVALHAQQDR;TMLESHKLDNIK;VKELYSLNEK	1;1;1;1;1;1	6	9	0.1671	195942;195946;195937;175285;43605;349649;349652;377147;258405	-	Mitochondrial calcium uniporter regulator 1 OS=Homo sapiens GN=MCUR1 PE=1 SV=1
7564_1	sp|O94992|HEXI1_HUMAN	6.11616	0.00351617	40598.5	LGAPAAGGEEEWGQQQR	1	1	2	0.0474	560534;560949	-	Protein HEXIM1 OS=Homo sapiens GN=HEXIM1 PE=1 SV=1
849_1	sp|O95255|MRP6_HUMAN	48.5702	0	164802	ALVASLPGQLQYK;ENSSEELVSR;GQVAESGSPAQLLAQK;INLTVPQGCLLAVVGPVGAGK;ISIIPQDPILFPGSLR;LLWDVVR;MQDYAWTPK;SSLASGLLR;TQAPFVAQNNAR;TTSEAQTEVPLDDPDR;VLALSSGSR	1;1;1;1;1;1;1;1;1;1;1	11	18	0.0918	353652;353653;213232;460740;460748;461319;663334;553413;553414;553807;84957;207504;86923;86925;86924;312219;556271;80405	-	Multidrug resistance-associated protein 6 OS=Homo sapiens GN=ABCC6 PE=1 SV=2
6620_1	sp|P17812|PYRG1_HUMAN	35.4562	0	66648	FSDSYASVIK;FVGQDVEGER;GIIASSVGTILK;GLGLSPDLVVCR;IYQYVINK;LLETCSIALVGK;SCGLHVTSIK;TKPTQNSVR;YIDSADLEPITSQEEPVR	1;1;1;1;1;1;1;0;1	8	12	0.1709	192105;205293;219868;219869;293638;293631;293649;150441;304701;304705;183390;146957;663200	-	CTP synthase 1 OS=Homo sapiens GN=CTPS1 PE=1 SV=2
6620_2	sp|Q9NRF8|PYRG2_HUMAN	53.9963	0	65635.8	ENFCNIHVSLVPQLSATGEQK;FEVNPNLIK;FLDINLYK;GLGLSPDLIVCR;HRFEVNPNLIK;ICSIALVGK;IYQHVINK;KLYGDVPFIEER;LHLPIGDSASNLLFK;NCLNLK;TKPTQNSVR;VPVLLEEQSIVK;YSDASDDSFSEPR	1;1;1;1;1;1;1;1;1;1;0;1;1	12	16	0.2321	742500;742477;742711;166800;144499;302069;341620;113504;139417;398221;481984;481980;25894;25897;146957;333953;403513	-	CTP synthase 2 OS=Homo sapiens GN=CTPS2 PE=1 SV=1
6073_1	sp|Q9BXF6|RFIP5_HUMAN	13.8226	0.000204499	70372	DPTQKPSPHPVKPLSAAPVEGSPDR;LKDSAVLDQSAK;SSGAGSTSDAYTVIQVGR	1;1;1	3	3	0.0842	785423;287390;548376	-	Rab11 family-interacting protein 5 OS=Homo sapiens GN=RAB11FIP5 PE=1 SV=1
1151_1	sp|P61927|RL37_HUMAN	17.5966	0.000204499	11070.9	AYHLQK;EGTTPKPK;RAAVAASSSS;THTLCR;TKGTSSFGK;YNWSAK	1;1;1;1;1;1	6	9	0.4639	24950;24944;65841;88242;34865;34864;90998;28142;28140	-	60S ribosomal protein L37 OS=Homo sapiens GN=RPL37 PE=1 SV=2
1382_1	sp|O95071|UBR5_HUMAN	27.125	0.000204499	309158	AYSIVIR;GLLDVLPK;IGFSVQPDR;NAQNPSLHHPR;NVAIFTAGQESPIILR;SHNDEHSDVLPVLDVCSLK;VLLLPLER;YCIFDLATGK	1;1;1;1;1;1;1;1	8	9	0.0314	49174;64591;141271;284990;284972;536196;690808;109112;237864	-	E3 ubiquitin-protein ligase UBR5 OS=Homo sapiens GN=UBR5 PE=1 SV=2
7763_1	sp|O43493|TGON2_HUMAN	20.5009	0.000204499	51082.4	ADTNQLADK;EAEDDDTGPEEGSPPKEEK;LSPHAFK;SGAEAQTPEDSPNR;SGAEEQGPIDGPSK;SSAEAQTPEDTPNK	1;1;1;1;1;1	6	6	0.1604	120070;661207;39816;394324;344159;402836	-	Trans-Golgi network integral membrane protein 2 OS=Homo sapiens GN=TGOLN2 PE=1 SV=2
1582_1	sp|P61599|NAA20_HUMAN	24.9374	0.000204499	20355.2	AFTCDDLFR;EEWHGHVTALSVAPEFR;LMELLEEISER;QLGYSVYR;SIIPLPHPVRPEDIE	1;1;1;1;1	5	12	0.3371	210261;632198;632206;632193;632192;632196;338792;338802;124853;527340;527363;527361	-	N-alpha-acetyltransferase 20 OS=Homo sapiens GN=NAA20 PE=1 SV=1
2117_1	sp|P61018|RAB4B_HUMAN	18.3485	0.000204499	23571.9	ETYNSLAAWLTDAR;FKQDSNHTIGVEFGSR;GAAGALLVYDITSR;MGSGIQYGDASLR	1;1;0;1	3	6	0.2676	475097;577205;577209;364972;364970;364973;364964;364920;334226;343651;334234	-	Ras-related protein Rab-4B OS=Homo sapiens GN=RAB4B PE=1 SV=1
3707_2	sp|O95166|GBRAP_HUMAN	6.11616	0.00351617	13909.3	FVYKEEHPFEK;VPVIVEK;YPDRVPVIVEK	1;1;1	3	8	0.188	390726;390718;390727;390719;390725;33526;311276;311229	-	Gamma-aminobutyric acid receptor-associated protein OS=Homo sapiens GN=GABARAP PE=1 SV=1
3786_1	sp|Q49A26|GLYR1_HUMAN	50.02	0	60518	ALDQSDNDMSAVYR;DLVLGPSGVLQGIRPGK;FFGTEDHAWIK;GLYEDCSSCFQAMGK;LAIALGDAVNHPTPMAAAANEVYKR;LGDLVWGK;MGHTVTVWNR;TPAEVVSTCDITFACVSDPK;TSFFLGEVGNAAK	1;1;1;1;1;1;1;1;1	9	16	0.2405	460979;524666;524669;524668;524671;524667;331930;546913;546914;783280;783544;79697;245548;255248;700065;326287	-	Putative oxidoreductase GLYR1 OS=Homo sapiens GN=GLYR1 PE=1 SV=3
2929_3	sp|P55795|HNRH2_HUMAN	48.9293	0	49232.3	ANMQHR;DLNYCFSGMSDHR;EGRPSGEAFVELESEEEVK;FFSDCK;GAYGGGYGGYDDYGGYNDGYGFGSDR;GLPFGCSK;GLPWSCSADEVMR;HTGPNSPDTANDGFVR;IQNGTSGIR;RGAYGGGYGGYDDYGGYNDGYGFGSDR;SNSVEMDWVLK;STGEAFVQFASQEIAEK;THYDPPR;THYDPPRK;VHIEIGPDGR;VTGEADVEFATHEDAVAAMAK;YGDGGSSFQSTTGHCVHMR	0;0;1;0;1;0;1;0;1;1;1;0;0;0;0;1;1	8	42	0.4521	23012;29653;470430;470431;470434;478015;478017;470433;470432;679727;679731;679725;41241;792425;69530;69519;69522;420523;429446;420520;429449;513701;513690;514286;514803;105472;105470;105473;105971;105975;105973;105476;105477;105983;105962;812363;812563;306777;306792;306797;316601;584926;584942;584940;584927;584932;584935;585283;584924;584925;584936;584933;78865;78867;138764;178088;178091;178094;1…	-	Heterogeneous nuclear ribonucleoprotein H2 OS=Homo sapiens GN=HNRNPH2 PE=1 SV=1
2929_2	sp|P31942|HNRH3_HUMAN	61.3595	0	36903.1	ATENDIANFFSPLNPIR;ATGEADVEFVTHEDAVAAMSK;DGMDNQGGYGSVGR;EIAENALGK;GFYDPPR;GFYDPPRR;GLPFGCSK;GMGGHGYGGAGDASSGFHGGHFVHMR;HNGPNDASDGTVR;RGGDGYDGGYGGFDDYGGYNNYGYGNDGFDDR;STGEAFVQFASK;VHIDIGADGR;YIEIFR;YIELFLNSTPGGGSGMGGSGMGGYGR	1;1;1;1;1;1;0;1;1;1;1;1;1;1	13	45	0.5838	615227;615218;615228;615236;615226;615711;694888;699291;367967;104678;62952;62943;135992;69530;69519;69522;774046;774045;777048;777047;777046;777045;325537;325536;325538;325527;325531;325535;325534;863530;863598;285435;285439;285447;285444;285449;285443;285450;156543;156550;156566;57418;57420;57411;57410;770512;770515;773396	-	Heterogeneous nuclear ribonucleoprotein H3 OS=Homo sapiens GN=HNRNPH3 PE=1 SV=2
2929_1	sp|P52597|HNRPF_HUMAN	48.9644	0	45642.9	ANMQHR;ATENDIYNFFSPLNPVR;DLSYCLSGMYDHR;GLPFGCTK;HSGPNSADSANDGFVR;ITGEAFVQFASQELAEK;QSGEAFVELGSEDDVK;SSQEEVR;TEMDWVLK;VHIEIGPDGR;VTGEADVEFATHEEAVAAMSK;YGDSEFTVQSTTGHCVHMR;YIEVFK	0;0;1;1;1;1;1;1;1;0;1;1;1	10	30	0.3952	23012;29653;642134;642135;642125;477630;477625;477629;486038;76658;484977;484964;595283;595281;595265;595309;595300;526307;526325;54696;142589;142582;178088;178091;178094;178105;698827;698846;698826;703183;698817;704113;704117;708625;708621;704112;704115;39360;39359	-	Heterogeneous nuclear ribonucleoprotein F OS=Homo sapiens GN=HNRNPF PE=1 SV=3
4237_1	sp|Q9UI30|TR112_HUMAN	20.4488	0.000204499	14190.3	GPVEGYEENEEFLR;ICPVEFNPNFVAR;LLTHNLLSSHVR;MFPISR	1;1;1;1	4	9	0.36	504429;504478;450095;450097;450101;354756;355291;21307;21308	-	Multifunctional methyltransferase subunit TRM112-like protein OS=Homo sapiens GN=TRMT112 PE=1 SV=1
5987_1	sp|Q15063|POSTN_HUMAN	74.553	0	93255.3	AAAITSDILEALGR;DGHFTLFAPTNEAFEK;DQGPNVCALQQILGTK;EIIKPAEK;ESDIMTTNGVIHVVDK;GCPAVLPIDHVYGTLGIVGATTTQR;GFEPGVTNILK;GMTSEEKEILIR;GSFTYFAPSNEAWDNLDSDIRR;IIDGVPVEITEK;IIHGNQIATNGVVHVIDR;LILQNHILK;LLYPADTPVGNDQLLEILNK;NGAIHIFR;TAVCIENSCMEK;VGLNELYNGQILETIGGK	1;1;1;1;1;1;1;1;1;1;1;1;1;1;1;1	16	35	0.2835	360796;577814;577809;577812;542155;542141;542165;542707;96825;549325;549931;783683;783677;230000;229997;364059;777603;777831;309797;309799;628610;177790;177791;708278;708274;708570;708568;96775;97122;384021;614938;614947;614931;614925;614930	-	Periostin OS=Homo sapiens GN=POSTN PE=1 SV=2
1843_2	sp|O00602|FCN1_HUMAN	46.9343	0	35056.1	DQDNDVSSSNCAEK;DWAAYK;GDAGQSQSCATGPR;LVLGAFVGGSAGNSLTGHNNNFFSTK;MDGSVDFYR;RMDGSVDFYR;VADEAEK;VADEAEKYK;VDLVDFEGNHQFAK;VVGLEGSDK;VVGLEGSDKLTILR	1;1;1;1;1;1;0;1;1;1;1	10	27	0.3282	452524;453113;22131;355357;785708;785703;785707;785709;785836;785701;785954;176084;176083;271017;279618;279620;25802;156499;478695;478694;478692;479158;479223;86671;416564;416565;416568;416566	-	Ficolin-1 OS=Homo sapiens GN=FCN1 PE=1 SV=2
1843_1	sp|Q15485|FCN2_HUMAN	36.9384	0	33979.5	DWATYK;GTHGSFANGINWK;LGEFWLGNDNIHALTAQGTSELR;MVGLEGSDKLTILR;NCHVSNLNGR;RVDGSVDFYR;VADEAEK;VDGSVDFYR;VDLVDFEDNYQFAK	1;1;1;1;1;1;0;1;1	8	21	0.3099	33184;353928;354415;353927;353926;773968;773971;774261;434420;434413;226934;226932;226929;227545;226933;253490;25802;159190;159181;159207;522888;523334	-	Ficolin-2 OS=Homo sapiens GN=FCN2 PE=1 SV=2
1159_2	sp|Q8WVM7|STAG1_HUMAN	37.712	0	144336	ALQSLYTNR;DGIEFAFK;FALTFGLDQIK;HVESDVLEACSK;IVSMTLDKEYDVAVEAIR;LELLLQK;MYSDAFLNDSYLK;NLLAAFSK;REDVWLPLISYR;TDTMIQTPGPLPAPQLTSTVLR;TSAHVSGIK;TYSILCSEEYTIQNR;YYNDYGDIIK	1;0;1;1;1;0;0;1;1;1;1;1;0	9	12	0.1224	163558;96283;275408;345100;659682;65599;65593;452056;68692;442230;442235;735174;735340;84131;599120;599123;280560	-	Cohesin subunit SA-1 OS=Homo sapiens GN=STAG1 PE=1 SV=3
1159_1	sp|Q8N3U4|STAG2_HUMAN	25.2765	0.000204499	141235	DGIEFAFK;EAIAMLHK;LELLLQK;MYSDAFLNDSYLK;NSLLAGGDDDTMSVISGISSR;QGPNANLVK;SQLIDELADKFNR;SSSTFSGIK;YYNDYGDIIK	0;1;0;0;1;1;1;1;0	5	6	0.0796	96283;91040;65599;65593;452056;672405;102849;443340;443328;91450;280560	-	Cohesin subunit SA-2 OS=Homo sapiens GN=STAG2 PE=1 SV=3
18_1	sp|Q01105|SET_HUMAN	53.5046	0	33468.7	EFHLNESGDPSSK;EQQEAIEHIDEVQNEIDR;IDFYFDENPYFENK;KPRPPPALGPEETSASAGLPK;LNEQASEEILK;LNEQASEEILKVEQK;QSPLPPQK;QSPLPPQKK;VEVTEFEDIK;VEVTEFEDIKSGYR	1;1;1;1;1;1;1;1;1;1	10	75	0.3586	387152;387153;387158;387147;387144;387732;699577;699570;699580;700078;699820;699569;584555;584554;584551;584558;584561;584557;584549;584556;584553;584564;584562;584559;584560;584841;584563;584843;674092;674108;674091;674082;674109;674031;674113;674105;674097;674102;673978;674077;674073;674118;674083;674099;674112;674111;286568;549482;549481;549501;549495;82348;82346;82355;82349;143249;143246;1432…	-	Protein SET OS=Homo sapiens GN=SET PE=1 SV=3
2445_1	sp|Q8TBK2|SETD6_HUMAN	11.5328	0.000204499	53155	MVATQPIPK;QGTVAGYGMVAR;VGLELSPK	1;1;1	3	3	0.0613	124529;251246;58336	-	N-lysine methyltransferase SETD6 OS=Homo sapiens GN=SETD6 PE=1 SV=2
5759_1	sp|Q7Z4I7|LIMS2_HUMAN	22.5656	0.000204499	38889.6	AMNNNWHPGCFR;AWCVSCFSCSTCNSK;CEKPFLGHR;CELCDVELADLGFVK;CHLVIDEQPLMFR;ELKGELYCLPCHDK;FPLELK;FVEFDMKPVCK;GELYCLPCHDK;MGVPICGACR;QWHVEHFVCAK;RPIEGR	1;1;0;1;1;0;0;0;0;0;0;0	4	4	0.3578	418403;589318;209754;209749;553911;499273;551175;551173;19866;19868;19867;19870;360030;355369;194500;383686;383677;383678;383685;12647	-	LIM and senescent cell antigen-like-containing domain protein 2 OS=Homo sapiens GN=LIMS2 PE=1 SV=1
5759_2	sp|P48059|LIMS1_HUMAN	39.7194	0	37225.8	AMNNSWHPECFR;AWCVNCFACSTCNTK;CEKPFLGHR;CHAIIDEQPLIFK;ELKGELYCLPCHDK;FPLELK;FVEFDMKPVCK;GELYCLPCHDK;GLAYCETHYNQLFGDVCFHCNR;KGLAYCETHYNQLFGDVCFHCNR;LAETLGR;MGVPICGACR;NDPYHPDHFNCANCGK;QWHVEHFVCAK;RPIEGR;VIEGDVVSALNK;VVNAMGK	1;1;0;1;0;0;0;0;1;1;1;0;1;0;0;1;1	9	16	0.5292	442996;450788;451092;599581;599924;599923;209754;209749;460708;460707;551175;551173;19866;19868;19867;19870;360030;355369;805304;820711;25026;194500;624639;624640;383686;383677;383678;383685;12647;270140;270122;9227	-	LIM and senescent cell antigen-like-containing domain protein 1 OS=Homo sapiens GN=LIMS1 PE=1 SV=4
8639_1	sp|Q9BUN8|DERL1_HUMAN	15.3791	0.000204499	28781.8	GGVSGFGVPPASMR;HNWGQGFR;NFLSTPQFLYR;SDIGDWFR	1;1;1;1	4	9	0.1633	313522;313530;313521;313525;132959;352451;352447;352460;129892	-	Derlin-1 OS=Homo sapiens GN=DERL1 PE=1 SV=1
3789_1	sp|P34949|MPI_HUMAN	56.416	0	46625.8	DTFNGNLPFLFK;GDCVECMACSDNTVR;KVPEFQFLIGDEAATHLK;KVVVEQLNLLVK;TEVPGSVTEYK;TLSQWIAENQDSLGSK;VFPLSCAVQQYAWGK;VLSVETPLSIQAHPNK;VPEFQFLIGDEAATHLK;VVVEQLNLLVK	1;1;1;1;1;1;1;1;1;1	10	20	0.2719	368344;368345;556200;656928;657239;656916;350509;350508;251205;557943;557935;557941;557945;547476;547472;538284;538282;538283;613678;276093	-	Mannose-6-phosphate isomerase OS=Homo sapiens GN=MPI PE=1 SV=2
8104_1	sp|Q86WV6|STING_HUMAN	6.11616	0.00351617	42165.7	LIAYQEPADDSSFSLSQEVLR	1	1	2	0.0554	742043;742059	-	Stimulator of interferon genes protein OS=Homo sapiens GN=TMEM173 PE=1 SV=1
6092_1	sp|O60880|SH21A_HUMAN	6.71965	0.00187688	14178.3	LLLATGLDGSYLLR;NLISAFQKPDQGIVIPLQYPVEK	1;1	2	2	0.2891	419494;783856	-	SH2 domain-containing protein 1A OS=Homo sapiens GN=SH2D1A PE=1 SV=1
2764_1	sp|Q99487|PAFA2_HUMAN	50.5064	0	44007	AMLAFLQK;FFSTETR;GFVVAVPEHR;GPVFFINTEK;IITVLGSVHR;LFYPCQK;LPVSWNGPFK;SAATTYFCK;SQTDFAFVTGNLIGK;VAVMGHSFGGATAILALAK;YEYCTGLAEYLQFNKR	1;1;1;1;1;1;1;1;1;1;1	11	23	0.3087	94903;94906;94901;79537;79535;189159;215437;215435;179672;179674;179670;179673;110397;210542;210537;210526;210536;154175;468534;573964;573969;660498;660269	-	Platelet-activating factor acetylhydrolase 2, cytoplasmic OS=Homo sapiens GN=PAFAH2 PE=1 SV=1
6374_1	sp|Q96FH0|BORC8_HUMAN	26.2504	0.000204499	13394.6	FTESVYVLANEPSVALYR;NLVDSSVYFR;RSLPELAQHK;SLPELAQHK;SVEGLLK;WEEQSQGAIYTVEYACSAVK	1;1;1;1;1;1	6	8	0.5462	661111;661707;245046;232579;143198;19353;730749;730744	-	BLOC-1-related complex subunit 8 OS=Homo sapiens GN=BORCS8 PE=1 SV=1
6708_1	sp|Q8IWA0|WDR75_HUMAN	18.8345	0.000204499	94438.4	SQSLLTFSTK;VQDTSNTGLGEDIIHQLSK;VQWGVFVPR;VWILTDDSDIYKK	1;1;1;1	4	5	0.0614	189586;660333;660337;174987;467549	-	WD repeat-containing protein 75 OS=Homo sapiens GN=WDR75 PE=1 SV=1
4161_1	sp|Q9H9Y2|RPF1_HUMAN	19.2997	0.000204499	40086.1	ILITTSDRPHGR;LCEQLSTVIPNSHVYYR;MFASLFPHNPQFIGR;YGEYEWVHKPR	1;1;1;1	4	5	0.1576	341035;667929;667922;551298;396798	-	Ribosome production factor 1 OS=Homo sapiens GN=RPF1 PE=1 SV=2
5751_1	sp|Q96PZ0|PUS7_HUMAN	14.4357	0.000204499	74988.2	LGELQGNHFTVVLR;NIVSAFGIIPR;YIVAYHAAGK	1;1;1	3	3	0.053	460330;237522;178104	-	Pseudouridylate synthase 7 homolog OS=Homo sapiens GN=PUS7 PE=1 SV=2
5008_1	sp|P26640|SYVC_HUMAN	222.524	0	140387	AASGYPVK;AASGYPVKVPLEVQEADEAK;ADFPAGIPECGTDALR;ADYNLTR;ALSPLEEWLR;AVLGEVVLYSGARPLSHQPGPEAPALPK;AVLVALK;CGEMAQAASAAVTR;DPGVITYDLPTPPGEK;DPGVITYDLPTPPGEKK;DVSGPMPDSYSPR;DVVEPLLRPQWYVR;EAFLQEVWK;EVYLHAIVR;FGLCAYMSQGR;GALINVPPPFLGLPR;GETTLWNPGCDHAGIATQVVVEK;GFVPSPTSQPGGHESLVDR;GIEDNPMVVPLCNR;HGLEAISIMDSR;ICLQPPPTSR;IETMLGDVAVAVHPK;ILPEAHQR;IQQQQPPPGEK;ITPAHDQNDYEVGQR;IWNNVTR;KDVSGPMPDSYSPR;KLGSSLDWDR…	1;1;1;1;1;1;1;1;1;1;1;1;1;1;1;1;1;1;1;1;1;1;1;1;1;1;1;1;1;1;1;1;1;1;1;1;1;1;1;1;1;1;1;1;1;1;1;1	48	144	0.3845	37048;674337;516349;516371;516365;516354;63317;253718;817087;816990;816992;6755;6731;373838;374402;373850;382407;520780;520792;520798;578977;578976;365089;374396;365103;554960;213431;213425;182435;182433;295687;449356;449359;449350;449353;449352;449357;449351;449358;762632;762638;762643;632792;632785;632784;632786;632790;476109;484461;476111;476105;476108;484442;476107;319876;319863;328503;328498…	-	Valine--tRNA ligase OS=Homo sapiens GN=VARS PE=1 SV=4
5275_2	sp|Q93088|BHMT1_HUMAN	87.7465	0	44969.8	AGASIIGVNCHFDPTISLK;AGPWTPEAAVEHPEAVR;AGSNVMQTFTFYASEDK;AGSNVMQTFTFYASEDKLENR;AHLMSQPLAYHTPDCNK;AIAEELAPER;EATTEQQLK;EAYNLGVR;EYWENLR;GFLPPASEK;GTAELMQQK;HGSWGSGLDMHTKPWVR;ISGQEVNEAACDIAR;KEYWENLR;KVFLQQLEVFMK;LKAHLMSQPLAYHTPDCNK;LMKEGLEAAR;QVADEGDALVAGGVSQTPSYLSCK;SETEVKK;VFLQQLEVFMK;VFLQQLEVFMKK;YIGGCCGFEPYHIR	1;1;1;1;1;0;1;0;1;0;1;1;1;1;1;1;1;1;1;1;1;0	18	179	0.5616	643279;643287;643303;643281;643290;643550;643260;643560;643285;643243;643272;643553;643549;575226;575231;575233;575236;575202;575227;575224;575217;575188;575237;605934;749758;752594;752762;752905;752583;752584;749757;752586;749954;749770;752593;749752;752590;752588;749761;749754;749756;749750;749747;752589;749751;749957;752581;752591;749945;752906;749948;749767;752764;749783;749749;750076;637555;…	-	Betaine--homocysteine S-methyltransferase 1 OS=Homo sapiens GN=BHMT PE=1 SV=2
2226_1	sp|P51884|LUM_HUMAN	54.3306	0	38404.8	FNALQYLR;ILGPLSYSK;ISETSLPPDMYECLR;ISNIPDEYFK;ISNIPDEYFKR;LKEDAVSAAFK;NIPTVNENLENYYLEVNQLEK;NNQIDHIDEK;SLEDLQLTHNK;SLEYLDLSFNQIAR;SVPMVPPGIK	1;1;1;1;1;1;1;1;1;1;1	11	65	0.355	144005;144014;144010;144006;144013;144004;144011;144017;144008;144007;144483;121473;121480;121478;121479;572552;572562;259437;259438;259447;259442;350203;232534;232528;232529;232541;232539;232532;232531;232530;232521;232522;232537;772931;772938;772937;772936;773130;772933;772945;260240;259351;300723;300739;300719;300712;505321;505323;505316;505299;505330;505318;505329;505280;144070;144068;144067;…	-	Lumican OS=Homo sapiens GN=LUM PE=1 SV=2
6918_1	sp|Q96ST3|SIN3A_HUMAN	47.0853	0	145085	AELVQLVSPFLGK;AFLEILHTYQK;EHLAQKPVFLPR;FQGQPDIYK;FRLDNTLGGTSEVIHR;LKVEDALSYLDQVK;NPSIAVPIVLK;SLLESTYQR;SPPVQPHTPVTISLGTAPSLQNNQPVEFNHAINYVNK;SQSIDTPGVISR;VLEAIQK	1;1;1;1;1;1;1;1;1;1;1	11	13	0.1186	360859;339428;339427;380483;380484;179899;574206;479976;214983;180596;881729;278656;40279	-	Paired amphipathic helix protein Sin3a OS=Homo sapiens GN=SIN3A PE=1 SV=2
5374_1	sp|P63172|DYLT1_HUMAN	6.11616	0.00351617	12444	EAIESAIGGNAYQHSK	1	1	2	0.1416	508621;508623	-	Dynein light chain Tctex-type 1 OS=Homo sapiens GN=DYNLT1 PE=1 SV=1
1106_3	sp|Q92598|HS105_HUMAN	103.584	0	96803.7	AFNDPFIQK;AGGIETIANEFSDR;CTPSVISFGSK;DISTTLNADEAVAR;EKENLSYDLVPLK;FICEQDHQNFLR;FVVQNVSAQK;IKELNNTCEPVVTQPKPK;KPVTDCVISVPSFFTDAERR;KVDQPPEAK;LMNDMTAVALNYGIYK;LVEHFCAEFK;MIMQDKLEK;NAVEEYVYEFR;NHAAPFSK;NQQITHANNTVSNFK;NQQITHANNTVSNFKR;QAYVDKLEELMK;RGPFELEAFYSDPQGVPYPEAK;SQFEELCAELLQK;SVLDAAQIVGLNCLR;TPNGPNIDKK;VEDVSAVEIVGGATR;VLGTAFDPFLGGK	1;1;1;0;1;1;1;1;1;1;1;1;0;1;0;1;1;1;1;1;1;1;1;1	21	35	0.3497	169744;406039;234912;404335;442823;472641;194308;672716;672721;731843;137924;575242;581618;290522;290523;205461;371416;72370;72371;72374;529686;529579;596645;596646;596650;596651;597075;596661;398737;765416;466964;466935;484214;484223;484201;484199;172105;417476;315527;315563	-	Heat shock protein 105 kDa OS=Homo sapiens GN=HSPH1 PE=1 SV=1
1106_2	sp|P34932|HSP74_HUMAN	59.6164	0	94271.2	AFSDPFVEAEK;AGGIETIANEYSDR;CTPACISFGPK;ELSTTLNADEAVTR;FVSEDDRNSFTLK;KFDEVLVNHFCEEFGK;LFEELGK;LKETAESVLK;LMNETTAVALAYGIYK;MIMQDKLEK;NFTTEQVTAMLLSK;NHAAPFSK;NKEDQYDHLDAADMTK;NLGQPIK;QSLTMDPVVK;VLATAFDTTLGGR;VLTFYR	1;1;1;1;1;1;1;1;0;0;1;0;1;1;1;1;1	14	19	0.2321	267148;414006;413999;414050;265934;427787;447613;642394;642405;55180;193144;193141;549440;556452;549447;205461;460198;72370;72371;72374;605221;28759;193002;315520;39402;39400	-	Heat shock 70 kDa protein 4 OS=Homo sapiens GN=HSPA4 PE=1 SV=4
1106_1	sp|O95757|HS74L_HUMAN	33.5775	0	94452.5	AVMEQANLQR;CTPACISLGSR;DISTTLNADEAVAR;IQLVMK;LMNETTAVALAYGIYK;LSLTQDPVVK;MIMQDKLEK;QLGQDLLNSYIENEGK;SQIVTNVR;VITFHK;VLATTFDPYLGGR;VNIHGIFSVASASVIEK	1;1;0;1;0;1;0;1;1;1;1;1	9	10	0.1621	220080;257719;404335;14997;14867;549440;556452;549447;182464;205461;576798;93225;18853;366637;555375	-	Heat shock 70 kDa protein 4L OS=Homo sapiens GN=HSPA4L PE=1 SV=3
7906_1	sp|Q12797|ASPH_HUMAN	87.8689	0	85809.4	AQCEDDLAEK;AQPWWTPK;EGIESGDPGTDDGR;FYFHLGDAMQR;GAIETYQEVASLPDVPADLLK;GDWSQFTLWQQGR;GHFASVWQR;GKIEEAVNAFK;GLFLPEDENLR;GLFLPEDENLREK;GSLLTLQR;IAESIPYLK;IEEAVNAFK;KVYEEVLSVTPNDGFAK;MHLGLVIPK;NDLGVGYLLIGDNDNAKK;QQFLGHMR;SLYNVNGLK;VYEEVLSVTPNDGFAK;YSIMHPGTHVWPHTGPTNCR	1;1;1;1;1;1;1;1;1;1;1;1;1;1;1;1;1;1;1;1	20	41	0.2731	232196;138777;363044;363047;351811;351809;360472;360476;360479;709195;473603;473601;473599;473608;473578;174514;174513;248785;248767;303854;448699;448685;448673;79815;148235;148231;148233;142287;606063;606061;143685;615260;140322;136147;136599;136601;554042;554034;554428;737494;737495	-	Aspartyl/asparaginyl beta-hydroxylase OS=Homo sapiens GN=ASPH PE=1 SV=3
6526_1	sp|Q5MNZ6|WIPI3_HUMAN	15.4709	0.000204499	38097.1	FLFNPK;IVVVLDSMIK;QSSLASASFLPK;VYNTDPLKEK	1;1;1;1	4	5	0.1105	27440;192383;264922;264870;249340	-	WD repeat domain phosphoinositide-interacting protein 3 OS=Homo sapiens GN=WDR45B PE=2 SV=2
4632_1	sp|P11182|ODB2_HUMAN	104.718	0	53452.9	AQIMNVSWSADHR;ASHNIGIAMDTEQGLIVPNVK;DMTVPILVSKPPVFTGK;EDILNYLEK;EELKPIAFAR;EWYVK;FNQKGEVYK;FSNLWK;GQVVQFK;ILKEDILNYLEK;IPHFGYCDEIDLTELVK;LAMENNIK;LREELKPIAFAR;LSDIGEGIR;LSEVVGSGK;LSEVVGSGKDGR;LSFMPFFLK;QTGAILPPSPK;RLAMENNIK;SYLENPAFMLLDLK;TLATPAVR;TMSAALK;VEIMPPPPKPK;VIDGATMSR;YDGVIKK	1;1;1;1;1;1;1;1;1;1;1;1;1;1;1;1;1;1;1;1;1;1;1;1;1	25	129	0.4668	424458;424448;424466;424464;433263;424442;424455;424447;433265;433268;703027;703022;707277;707278;703020;703023;703026;703035;707281;707569;703513;707279;707553;707973;707273;586261;579697;579703;579690;579707;579692;586264;586262;586272;579700;579694;579716;586269;579699;579702;586271;206055;206042;229499;229511;11390;189951;37590;37596;37597;42357;42359;411712;411713;411718;411711;411714;411715…	-	Lipoamide acyltransferase component of branched-chain alpha-keto acid dehydrogenase complex, mitochondrial OS=Homo sapiens GN=DBT PE=1 SV=3
78_1	sp|Q9Y2Z0|SGT1_HUMAN	78.1521	0	40998.5	ALEQKPDDAQYYCQR;AYCHILLGNYCVAVADAK;CQEAQNGSESEVWTHQSK;KGICEYHEK;LDIETGFHR;LEGQGDVPTPK;LELLHPIIPEQSTFK;LFQQIYSDGSDEVKR;NDVNVEFSEK;NDVNVEFSEKELSALVK;NLYPSSSPYTR;NYAAALETFTEGQK;SFMESGGTVLSTNWSDVGK;SFMESGGTVLSTNWSDVGKR;SLELNPNNSTAMLR	1;1;1;1;1;1;1;1;1;1;1;1;1;1;1	15	34	0.5096	601856;601861;601857;654988;675469;222506;174708;174669;208277;552944;552943;552937;552945;552946;561017;561013;561025;561040;233421;234029;616136;293016;293020;293014;440139;440142;440131;643712;689540;689232;689271;448639;456560;456571	-	Protein SGT1 homolog OS=Homo sapiens GN=SUGT1 PE=1 SV=3
2009_1	sp|Q9NXE4|NSMA3_HUMAN	10.2005	0.000204499	93292.1	FDFPVSYLPGPVK;LAQLITQAK	1;1	2	3	0.0266	398224;398179;125078	-	Sphingomyelin phosphodiesterase 4 OS=Homo sapiens GN=SMPD4 PE=1 SV=2
5934_1	sp|P04196|HRG_HUMAN	46.7874	0	59540.9	ADLFYDVEALDLESPK;ALDLINK;ALDLINKR;DGYLFQLLR;DHHHPHKPHEHGPPPPPDER;GEVLPLPEANFPSFPLPHHK;GGEGTGYFVDFSVR;KGEVLPLPEANFPSFPLPHHK;RPSEIVIGQCK;YKEENDDFASFR	1;1;1;1;1;1;1;1;1;1	10	19	0.2114	578227;34680;103845;197681;738020;738018;708251;708254;411376;411377;411373;739155;739157;739152;739331;739154;739335;294414;428053	-	Histidine-rich glycoprotein OS=Homo sapiens GN=HRG PE=1 SV=1
2895_1	sp|P36578|RL4_HUMAN	123.475	0	47667.4	AAAAAAALQAK;APIRPDIVNFVHTNLR;AWNDIK;EAVLLLK;EAVLLLKK;FCIWTESAFR;GPCIIYNEDNGIIK;IEEVPELPLVVEDK;IEEVPELPLVVEDKVEGYK;KLDELYGTWR;LAPGGHVGR;LDELYGTWR;LKAWNDIK;LNPYAK;MFAPTK;MINTDLSR;NIPGITLLNVSK;NNRQPYAVSELAGHQTSAESWGTGR;NVTLPAVFK;QPYAVSELAGHQTSAESWGTGR;RGPCIIYNEDNGIIK;SGQGAFGNMCR;SNYNLPMHK;TKEAVLLLK;VDKAAAAAAALQAK;YAICSALAASALPALVMSK	1;1;1;1;1;1;1;1;1;1;1;1;1;1;1;1;1;1;1;1;1;1;1;1;1;1	26	163	0.5059	111176;111157;111146;111117;111188;592906;592913;592908;592914;592905;592911;592917;592907;592912;592918;592909;592920;592923;592903;592910;593238;592919;592904;592899;592901;593246;592902;592916;19711;34381;34391;34396;34403;34393;34390;34372;91824;312087;312075;312086;312084;312077;312088;472223;472220;472218;472225;472226;472713;472215;472204;473940;473936;473934;473942;473935;473929;473923;69…	-	60S ribosomal protein L4 OS=Homo sapiens GN=RPL4 PE=1 SV=5
7532_1	sp|Q96QE5|TEFM_HUMAN	16.0478	0.000204499	41649.7	LFSSEQQASILHVLNTASTK;LTVLDWQQSDR;QFLFDSILK;STVQVCNSILCPK	1;1;1;1	4	4	0.1472	694001;337970;189183;419738	-	Transcription elongation factor, mitochondrial OS=Homo sapiens GN=TEFM PE=1 SV=1
58_2	sp|Q9Y2H1|ST38L_HUMAN	17.3256	0.000204499	53968.4	AKDLILR;DIKPDNLLLDAK;EQVAHIR;GHPFFEGVDWEHIR;NLTHNPPSDFSFQNMNSK;TRLGLDDFESLK	0;1;1;1;1;1	5	6	0.1509	51842;334586;63403;534117;667584;667859;357019	-	Serine/threonine-protein kinase 38-like OS=Homo sapiens GN=STK38L PE=1 SV=3
7306_1	sp|Q9NZ08|ERAP1_HUMAN	210.302	0	107166	AEGYFR;AEGYFRK;ALDLSLYLK;ASLINNAFQLVSIGK;DLIDKQTWTDEGSVSER;DMNEVETQFK;EMFDDVSYDK;ESALLFDAEK;EYLSADAFK;FELGSSSIAHMVMGTTNQFSTR;FMEFVSVSVTHPELK;GACILNMLR;GFFSSLK;GFFSSLKENGSQLR;GFPLITITVR;GMDGFCSR;HLAISNMPLVK;ILASTQFEPTAAR;LQWLLDESFK;LQWLLDESFKGDK;LSEEPLQVLEHPR;MAFPCFDEPAFK;NEDLWDSMASICPTDGVK;NPVGYPLAWQFLR;QDLAAIPDFQSGAMENWGLTTYR;QTWTDEGSVSER;RDMNEVETQFK;RSDGTPFPWNK;SDGTPFPWNK;SGIVQYLQK;SQHSSSSSHWHQ…	1;1;1;1;1;1;1;1;1;1;1;1;1;1;1;1;1;1;1;1;1;1;1;1;1;1;1;1;1;1;1;1;1;1;1;1;1;1;1;1;1;1	42	159	0.4655	18026;18027;71877;148920;148921;148919;456321;456317;456769;456319;456764;636424;267729;267724;277140;277564;272843;281155;196232;196235;151473;151481;751377;751379;748433;748434;748435;553196;153845;162485;162468;153850;153853;34107;34111;34109;34099;34105;453432;453891;453895;453897;192392;192394;192393;192397;192395;192396;192391;97411;258467;258468;258466;258469;258471;258461;266910;258460;25…	-	Endoplasmic reticulum aminopeptidase 1 OS=Homo sapiens GN=ERAP1 PE=1 SV=3
58_1	sp|Q15208|STK38_HUMAN	25.0735	0.000204499	54155.4	AKDLILR;DIKPDNLLLDSK;ERPAAISIEIK;LGLEDFESLK;NLNHSLPSDFTFQNMNSK;SNSFFEGVDWEHIR	0;1;1;1;1;1	5	10	0.1548	51842;343939;260142;260139;214700;214704;672173;672379;533182;532789;533194	-	Serine/threonine-protein kinase 38 OS=Homo sapiens GN=STK38 PE=1 SV=1
638_1	sp|Q5RI15|COX20_HUMAN	10.0007	0.000204499	13282.8	ILYEGTHLDPER;LLGFLDVENTPCAR	1;1	2	3	0.2203	384839;471858;471863	-	Cytochrome c oxidase protein 20 homolog OS=Homo sapiens GN=COX20 PE=1 SV=2
1389_1	sp|P01920|DQB1_HUMAN	21.2599	0.000204499	29972.2	AVTPLGPPDAEYWNSQK;HNYQLELR;NDQEETTGVVSTPLIR;TEALNHHNLLVCSVTDFYPAQIK	1;1;1;1	4	9	0.2452	597038;597040;597034;597549;597042;166274;550008;550480;793639	-	HLA class II histocompatibility antigen, DQ beta 1 chain OS=Homo sapiens GN=HLA-DQB1 PE=1 SV=2
6786_1	sp|Q86YS7|C2CD5_HUMAN	22.0027	0.000204499	110377	LISLMSGELQR;LSSLNLTNQALNK;SLNPQWNSEWFK;VDLFNDLNR	1;1;1;1	4	4	0.045	271960;370100;436329;185943	-	C2 domain-containing protein 5 OS=Homo sapiens GN=C2CD5 PE=1 SV=1
6701_1	sp|Q9ULX6|AKP8L_HUMAN	13.7425	0.000204499	71603.7	DQDLTQEIAMEHFVK;IQFVCSLCK;QTADFLQEYVTNK	1;1;1	3	3	0.0573	569478;217002;447113	-	A-kinase anchor protein 8-like OS=Homo sapiens GN=AKAP8L PE=1 SV=3
2001_1	sp|Q9Y4J8|DTNA_HUMAN	12.2323	0.000204499	83847.9	AQQNPTLLAELR;QLIAELENK;SAPDISFTIDANK;SASACSTPTHTPQDSLTGVGGDVQEAFAQSSR	0;0;1;1	2	3	0.0888	333850;333862;159405;347993;852397;852443	-	Dystrobrevin alpha OS=Homo sapiens GN=DTNA PE=1 SV=2
2001_2	sp|O60941|DTNB_HUMAN	17.445	0.000204499	71309.6	AQQNPTLLAELR;FDQFLK;LAAEAGNVTRPPTDLSFNFDANK;LPTAVFEGPSFGYTEHSVR;QLIAELENK;STSAGSTPTHCPQDSLSGVGGDVQEAFAQGTR	0;1;1;1;0;1	4	5	0.1611	333850;333862;38911;756861;672237;159405;848822;848985	-	Dystrobrevin beta OS=Homo sapiens GN=DTNB PE=1 SV=1
3031_1	sp|Q9H3N1|TMX1_HUMAN	19.9397	0.000204499	31770.8	DFINFISDKEWK;FIITALPTIYHCK;LLSESAQPLK;LLSESAQPLKK;VDVTEQPGLSGR	1;1;1;1;1	5	7	0.1714	439673;457246;457250;173555;253934;277701;278215	-	Thioredoxin-related transmembrane protein 1 OS=Homo sapiens GN=TMX1 PE=1 SV=1
4761_1	sp|Q9H1K1|ISCU_HUMAN	23.1187	0.000204499	17987.6	AALADYK;LHCSMLAEDAIK;NVGTGLVGAPACGDVMK;TFGCGSAIASSSLATEWVK;VVDHYENPR	1;1;1;1;1	5	7	0.3832	21627;353297;353308;492820;501480;634213;200207	-	Iron-sulfur cluster assembly enzyme ISCU, mitochondrial OS=Homo sapiens GN=ISCU PE=1 SV=2
3258_1	sp|Q16134|ETFD_HUMAN	135.422	0	68451.9	AAQIGAHTLSGACLDPGAFK;ALNEGGFQSIPK;ANCEPQTYGIGLK;DDSIPVNR;ELFPDWK;ELFPDWKEK;ELWVIDEK;FAEEADVVIVGAGPAGLSAAVR;FCPAGVYEFVPVEQGDGFR;FGILTEK;GAPLNTPVTEDR;GAPLNTPVTEDRFGILTEK;GIATNDVGIQK;GMEPWTLK;GTHTAMK;HHPSIRPTLEGGK;IPVPILPGLPMNNHGNYIVR;ITTHYTIYPR;LKQLAVAHEK;LQINAQNCVHCK;LTFPGGLLIGCSPGFMNVPK;NLSIYDGPEQR;NSWVWK;QLAVAHEK;TCDIKDPSQNINWVVPEGGGGPAYNGM;TIGLHVTEYEDNLK;VDHTVGWPLDR;VTIFAEGCHGHLAK	1;1;1;1;1;1;1;1;1;1;1;1;1;1;1;1;1;1;1;1;1;1;1;1;1;1;1;1	28	179	0.5251	638217;638215;638528;638519;638521;638527;279363;279365;279821;389574;389560;389633;389546;389536;92425;100286;100288;100283;100285;100298;240303;147321;147320;673720;673716;673722;673721;673708;673715;693873;693895;693869;693870;693877;693861;693875;693871;693874;693880;693900;694122;694129;693879;43147;43161;43114;43131;43098;43141;284343;284341;284336;661727;661125;191663;191670;191678;192245;…	-	Electron transfer flavoprotein-ubiquinone oxidoreductase, mitochondrial OS=Homo sapiens GN=ETFDH PE=1 SV=2
2669_1	sp|P31151|S10A7_HUMAN	16.7708	0.000204499	11463.6	ENFPNFLSACDKK;GTNYLADVFEK;GTNYLADVFEKK;KIDFSEFLSLLGDIATDYHK	1;1;1;1	4	5	0.4455	453233;277239;351978;729105;729096	-	Protein S100-A7 OS=Homo sapiens GN=S100A7 PE=1 SV=4
4830_1	sp|Q8NBN7|RDH13_HUMAN	44.164	0	35909.9	APAPEAEDEEVAR;GETLNHHVNAR;LAIVLFTK;LQGSGVTVNALHPGVAR;LVGLEAPSVR;QTALELAR;RLWAESAR;TVIVTGANTGIGK;VDILINNAGVMR;YFDGLK	1;1;1;1;1;1;1;1;1;1	10	13	0.3202	351174;272419;87312;87311;509449;509463;150488;85560;126154;126152;262137;311148;18051	-	Retinol dehydrogenase 13 OS=Homo sapiens GN=RDH13 PE=1 SV=2
7309_1	sp|Q96FS4|SIPA1_HUMAN	32.8667	0	112080	ALNGEQAAGHAR;FTFAETAGLRPGAR;LLEHVAPQLSPSCLR;RSFSELYTLSLQEPSR;SFSELYTLSLQEPSR;SFSELYTLSLQEPSRR;TQDTPAFGPALPAGGGPFAANADFR;TSAYSLEHADLGAGYYR	1;1;1;1;1;1;1;1	8	10	0.096	242252;413324;531773;531771;613000;548879;612955;756161;597462;597459	-	Signal-induced proliferation-associated protein 1 OS=Homo sapiens GN=SIPA1 PE=1 SV=1
1554_1	sp|Q9Y6M9|NDUB9_HUMAN	27.8802	0	21816.8	AMYPDYFAK;EAEEEFWYR;HLESWCVQR;QHPQPYIFPDSPGGTSYER;QLQEETPPGGPLTEALPPARK;VPEWCLDDWHPSEK;YFACLMR	1;1;1;1;1;1;1	7	15	0.4916	185793;185796;195457;278052;254125;694399;694407;694415;694388;694903;709013;709015;566785;566787;113090	-	NADH dehydrogenase [ubiquinone] 1 beta subcomplex subunit 9 OS=Homo sapiens GN=NDUFB9 PE=1 SV=3
2303_1	sp|Q14289|FAK2_HUMAN	27.5675	0	115800	DLAELINK;EIITSILLSGR;LAQQNAVTSLSEECKR;LGAQSIQPTANLDR;LIGSVDDLLPSLPSSSR;NVGLTLR	1;1;1;1;1;1	6	7	0.0723	92683;246439;581940;408085;548592;548595;29923	-	Protein-tyrosine kinase 2-beta OS=Homo sapiens GN=PTK2B PE=1 SV=2
5752_1	sp|P02462|CO4A1_HUMAN	12.2323	0.000204499	160514	AHGQDLGTAGSCLR;ILYHGYSLLYVQGNER	1;1	2	4	0.018	384737;384735;617453;617443	-	Collagen alpha-1(IV) chain OS=Homo sapiens GN=COL4A1 PE=1 SV=3
1672_1	sp|Q9Y3P9|RBGP1_HUMAN	14.9889	0.000204499	121660	EQQAQQEDPIER;LTYLGCASVNAPR;SYVITGSWNPK	1;1;1	3	3	0.0337	400687;373452;274796	-	Rab GTPase-activating protein 1 OS=Homo sapiens GN=RABGAP1 PE=1 SV=3
5615_1	sp|Q9BV38|WDR18_HUMAN	16.9114	0.000204499	47375	HGGLTLR;HLLGAEHGDEPR;LGLHQQGSEPSYLDR;LWDVQSK;NYISAWELQR	1;1;1;1;1	5	5	0.1181	22284;321082;521178;74561;290589	-	WD repeat-containing protein 18 OS=Homo sapiens GN=WDR18 PE=1 SV=2
2046_1	sp|Q15276|RABE1_HUMAN	8.30693	0.00039093	99229.4	DVQEQMAVLMQSR;LKAEILFLK	1;1	2	2	0.0255	435806;167343	-	Rab GTPase-binding effector protein 1 OS=Homo sapiens GN=RABEP1 PE=1 SV=2
4540_1	sp|P05155|IC1_HUMAN	64.8436	0	55119.4	FPVFMGR;FQPTLLTLPR;GVTSVSQIFHSPDLAIR;HRLEDMEQALSPSVFK;KYPVAHFIDQTLK;LEDMEQALSPSVFK;LLDSLPSDTR;LVLLNAIYLSAK;LYHAFSAMK;TLYSSSPR;TNLESILSYPK;TTFDPK;VATTVISK;VPMMNSK;VTTSQDMLSIMEK	1;1;1;1;1;1;1;1;1;1;1;1;1;1;1	15	33	0.294	63831;63822;63829;63838;236954;236942;236934;236958;236959;236937;579008;579001;579355;602611;602595;608635;448809;466427;192228;313321;313322;313837;171976;90126;90121;90119;281484;4523;48020;49241;407563;407574;415646	-	Plasma protease C1 inhibitor OS=Homo sapiens GN=SERPING1 PE=1 SV=2
3299_1	sp|Q10570|CPSF1_HUMAN	111.445	0	160782	AFHFDK;CAAMLVYGTR;CTAHYVAYHVESK;DALLLSFK;DGFVQNVHTPR;ENGTMEIYQLPDWR;ESLAEEHEGLVGEGQR;GPVTALCHCNGHLVSAIGQK;IFLWSLR;ITLDCAQATFISYDK;LGNSLLLK;LVVLPFR;MLHVDR;NGALSVLQK;NLMVYMYLPEAK;RVDATAGWSAAGK;SSFLPSYIIDVR;TLSLHYFEEPELR;TLSLVSR;VDATAGWSAAGK;VLVDSSFGQPTTQGEAR;VPHNINFR;VYAVATSTNTPCAR;YIVQVSPLGIR;YLYLSTMER	1;1;1;1;1;1;1;1;1;1;1;1;1;1;1;1;1;1;1;1;1;1;1;1;1	25	34	0.1843	27002;208621;450847;88560;284314;546494;541131;541132;541127;679334;100564;543750;66168;66152;58994;28988;97814;401230;295916;358712;358716;358718;486663;31066;203974;564554;564552;564512;130816;422378;270875;230278;230271;230261	-	Cleavage and polyadenylation specificity factor subunit 1 OS=Homo sapiens GN=CPSF1 PE=1 SV=2
4370_1	sp|Q8N6T3|ARFG1_HUMAN	15.4174	0.000204499	44640.3	ASELGHSLNENVLKPAQEK;DKVVALAEGR;IFDDVSSGVSQLASK;VVALAEGR	1;1;1;1	4	5	0.1084	663546;159433;445093;445550;45506	-	ADP-ribosylation factor GTPase-activating protein 1 OS=Homo sapiens GN=ARFGAP1 PE=1 SV=2
6741_1	sp|O94811|TPPP_HUMAN	6.11616	0.00351617	23679.2	NVTVTDVDIVFSK	1	1	2	0.0594	381611;382163	-	Tubulin polymerization-promoting protein OS=Homo sapiens GN=TPPP PE=1 SV=1
1095_1	sp|Q96N76|HUTU_HUMAN	100.406	0	74782.6	APVVLSR;AYEIICQTMQENSTLVVTLPHKVEDER;AYPIEQYPCQTK;CWSGNQK;DHHDVSGTDSPFR;DLVQESLR;DLVQESLRR;ETSNIYDGSAFCADMAVQNFVGDACR;FCPDIEMR;ILYSDQK;LMLSWDVSNGVAR;LQYMDNIR;LVITNGMVIPNYSSR;LVVGSQAR;MTEEQTLVMYSGHPLGLFPSSR;QAGVPHAPVR;QGWLMEVTDSLDR;QVSAINR;RYLGIEDLAGK;TPSLSPVEK;VAIAVAINQAIACR;VFVTSGLGGMSGAQAK;VLQQALQL;YLGIEDLAGK	1;1;1;1;1;1;1;1;1;1;1;1;1;1;1;1;1;1;1;1;1;1;1;1	24	77	0.3994	17892;17910;848755;848753;848581;415060;415042;415046;415030;415039;415022;415058;76576;400029;400034;400032;400039;112759;112742;191705;821697;821768;821766;164260;70289;387904;397067;388573;164659;164657;156492;156469;156414;502888;511453;511411;502867;502881;503321;503331;503330;502857;502906;503293;502884;502873;502876;52386;762334;762340;762332;762336;762329;765420;147439;443705;34999;35010;…	-	Urocanate hydratase OS=Homo sapiens GN=UROC1 PE=1 SV=1
2992_1	sp|P61326|MGN_HUMAN	19.7448	0.000204499	17152.8	IGSLIDVNQSK;IGSLIDVNQSKDPEGLR;SVMEELKR;VFYYLVQDLK;YYVGHK	1;1;1;1;1	5	6	0.2808	229475;584758;584759;128048;295057;27638	sp|Q96A72|MGN2_HUMAN	Protein mago nashi homolog OS=Homo sapiens GN=MAGOH PE=1 SV=1
51_1	sp|Q7Z6B0|CCD91_HUMAN	11.1479	0.000204499	49940.8	AAIIEEQKR;AVEEAVKR;IKEALIQQSQEQK	1;1;1	3	3	0.068	159458;85561;440347	-	Coiled-coil domain-containing protein 91 OS=Homo sapiens GN=CCDC91 PE=1 SV=2
5962_1	sp|O60678|ANM3_HUMAN	11.4529	0.000204499	59837.8	DFIYQNPHIFK;LFTSAEETFSHCK;QTVFLLEKPFSVK	1;1;1	3	3	0.0697	373427;447039;436630	-	Protein arginine N-methyltransferase 3 OS=Homo sapiens GN=PRMT3 PE=1 SV=3
3625_1	sp|A6NI28|RHG42_HUMAN	6.43511	0.00261438	98506.9	LMNTTFSPK;YYSILEK	1;1	2	2	0.0183	149683;92550	-	Rho GTPase-activating protein 42 OS=Homo sapiens GN=ARHGAP42 PE=1 SV=3
8364_1	sp|Q5R3I4|TTC38_HUMAN	115.772	0	52753.5	AADPTFVMGHAMATGLVLIGTGSSVK;AATVHLMQ;DALKPNSPLTER;DASESPGENCQHLLAR;DVFNQLLIHAALNCTSSVHK;DVGLPLCQALVEAEDGNPDR;EALSINPTDAWSVHTVAHIHEMK;ELDLAVK;EQLHVSAVETFANGNFPK;FSHDAYFYLGYQEQMR;GIYSFGLMETNFYDQAEK;IVQLGGSNAQR;IYPFWTPDIPLSSYVK;KAATVHLMQ;LDKELDLAVK;LFDATLTQYVK;LPLSTTSNEACK;LQMEGVSVGQR;REQLHVSAVETFANGNFPK;SLGGIEGCLSK;TMVEISR;VLELLLPIR;WQDVLPVAR	1;1;1;1;1;1;1;1;1;1;1;1;1;1;1;1;1;1;1;1;1;1;1	23	141	0.6098	772064;71883;79253;79255;326362;326359;326361;326365;326357;326363;560472;560475;560487;560482;718505;718510;718491;718499;718507;692195;692188;692211;692131;692198;692160;692184;692180;692162;692189;692177;692166;692204;692132;692149;692015;692203;692053;692205;692125;692173;692570;782071;782068;782065;35047;35074;639133;640087;639143;639141;639149;639135;639727;639140;639153;639710;639112;63973…	-	Tetratricopeptide repeat protein 38 OS=Homo sapiens GN=TTC38 PE=1 SV=1
8223_1	sp|Q9BRF8|CPPED_HUMAN	24.4646	0.000204499	35525.9	AIPLVLVSGNHDIGNTPTAETVEEFCR;LTEQAVQAINK;VVFSGHYHR;VVVVTAEK	1;1;1;1	4	9	0.1752	826071;826063;826069;254424;254422;255009;183352;183342;59462	-	Serine/threonine-protein phosphatase CPPED1 OS=Homo sapiens GN=CPPED1 PE=1 SV=3
678_1	sp|P08621|RU17_HUMAN	49.356	0	51525.8	DPIPYLPPLEK;EFEVYGPIK;EFEVYGPIKR;GYAFIEYEHER;IHMVYSK;MWDPHNDPNAQGDAFK;QQEVETELK;RVLVDVER;TLFVAR;VLVDVER;VNYDTTESK;YDERPGPSPLPHR	1;1;1;1;1;1;1;1;1;1;1;1	12	37	0.2288	291762;291769;291765;291758;291763;291759;291766;291767;171004;266234;266244;266249;266238;266252;368692;368691;368684;368686;368690;368687;75869;75870;75874;585183;585182;184635;125046;3917;3903;3868;3877;3908;52324;52287;158662;428275;428265	-	U1 small nuclear ribonucleoprotein 70 kDa OS=Homo sapiens GN=SNRNP70 PE=1 SV=2
4282_3	sp|Q9UJY5|GGA1_HUMAN	18.0349	0.000204499	70340	FLNELIK;IAEAYQMLK;LLTEMVMSHSQGGAAAGSSEDLMK;NIVFQSAVPK;RVNAIEEVNNNVK	0;1;1;1;1	4	5	0.0986	75487;75482;164036;756799;756802;184287;416451	-	ADP-ribosylation factor-binding protein GGA1 OS=Homo sapiens GN=GGA1 PE=1 SV=1
4282_1	sp|Q9NZ52|GGA3_HUMAN	5.71189	0.00418848	78266.6	FLNELIK;SIVLQAAVPK;SKNPDDLQEANK	0;1;1	2	2	0.0401	75487;75482;144779;337189	-	ADP-ribosylation factor-binding protein GGA3 OS=Homo sapiens GN=GGA3 PE=1 SV=1
536_1	sp|O75521|ECI2_HUMAN	114.372	0	43557.4	AKWDAWNALGSLPK;ASQKDFENSMNQVK;ATEMLIFGK;ATEMLIFGKK;ATFHTPFSHLGQSPEGCSSYTFPK;DFENSMNQVK;DPGNEVK;EKLHAVNAEECNVLQGR;KDPGNEVK;KLTAGEACAQGLVTEVFPDSTFQK;KSTGFETLVVTSEDGITK;LHAVNAEECNVLQGR;LPPNALR;LTAGEACAQGLVTEVFPDSTFQK;LYALYK;NAINTEMYHEIMR;NNAVLLR;QATEGPCNMPKPGVFDLINK;QNYVDLVSSLSPSLESSSQVEPGTDR;QNYVDLVSSLSPSLESSSQVEPGTDRK;STGFETLVVTSEDGITK;WDAWNALGSLPK	1;1;1;1;1;1;1;1;1;1;1;1;1;1;1;1;1;1;1;1;1;1	22	206	0.5254	447279;447228;447260;447273;447251;447291;447264;482201;482199;490666;482202;490648;490665;137010;137008;137005;144425;144417;144413;144421;206844;206842;795360;795358;795501;795362;795355;795356;795353;795365;795498;252210;252205;24109;633062;632793;632809;632802;632805;79276;783824;783986;783822;783821;783827;783992;612626;612631;612632;612623;612624;612625;526413;526424;526425;526426;526417;52…	-	Enoyl-CoA delta isomerase 2, mitochondrial OS=Homo sapiens GN=ECI2 PE=1 SV=4
5652_1	sp|Q9BQE5|APOL2_HUMAN	51.1121	0	37069.4	ALAEEVEQVHR;AQELEGK;ELEDHIRK;HLLEGAK;IHEMLQPGQDQ;ISAEGGEQVER;LASHMVMK;LNFLTK;NLDQSGTNVAK;SESAEELK;SESAEELKK;VVEGPAQAMSR;YFQDQVSR	1;1;1;1;1;1;1;1;1;1;1;1;1	13	39	0.3205	291225;291216;291213;291237;291208;291207;291204;291214;30599;150056;27890;27886;309031;299249;299237;229724;230232;229734;99224;99227;16400;16383;16402;16395;211414;81178;142271;210393;210384;210400;210404;220578;210385;210394;210405;220582;220584;210459;151036	-	Apolipoprotein L2 OS=Homo sapiens GN=APOL2 PE=1 SV=1
6882_1	sp|Q3MIX3|ADCK5_HUMAN	7.26551	0.000765111	65854.6	ELAHFPYVVVPR;LVVDGMGR	1;1	2	2	0.0345	376236;68027	-	Uncharacterized aarF domain-containing protein kinase 5 OS=Homo sapiens GN=ADCK5 PE=1 SV=2
2270_1	sp|Q96CB8|INT12_HUMAN	6.48485	0.00243309	48777.1	ALGFLHSK;ALLDESLAR	1;1	2	2	0.0368	73347;125787	-	Integrator complex subunit 12 OS=Homo sapiens GN=INTS12 PE=1 SV=1
5172_2	sp|P04075|ALDOA_HUMAN	83.6369	0	39395.3	AAQEEYVK;ALANSLACQGK;ALSDHHIYLEGTLLKPNMVTPGHACTQK;ELSDIAHR;FSHEEIAMATVTALR;FSHEEIAMATVTALRR;GILAADESTGSIAK;GILAADESTGSIAKR;GVVPLAGTNGETTTQGLDGLSER;IGEHTPSALAIMENANVLAR;LQSIGTENTEENRR;PYQYPALTPEQK;QLLLTADDR;TVPPAVTGITFLSGGQSEEEASINLNAINK;VLAAVYK;VNPCIGGVILFHETLYQK;YASICQQNGIVPIVEPEILPDGDHDLK;YASICQQNGIVPIVEPEILPDGDHDLKR;YTPSGQAGAAASESLFVSNHAY	1;1;1;1;1;1;1;1;1;1;1;1;1;1;0;1;0;0;1	16	36	0.739	101575;203278;203285;203306;842560;842559;842673;102778;509330;509311;580960;580966;322185;322192;410588;719807;719797;719796;675783;675778;675779;675782;680312;676112;676113;493317;493312;380287;152178;836314;26889;26880;26905;26877;26893;26871;26918;26896;26916;26873;26891;26915;26874;26888;26917;26904;26911;26885;26894;26886;26899;670724;670968;670726;833563;846265;846192;846188;846264;846116;…	-	Fructose-bisphosphate aldolase A OS=Homo sapiens GN=ALDOA PE=1 SV=2
5172_3	sp|P05062|ALDOB_HUMAN	127.507	0	39448.1	AANKEATQEAFMK;ALNDHHVYLEGTLLKPNMVTAGHACTK;ALQASALAAWGGK;AMANCQAAK;DGVDFGK;DGVDFGKWR;EATQEAFMK;EATQEAFMKR;EKGIVVGIK;ELSEIAQSIVANGK;ETTIQGLDGLSER;FPALTQEQK;FPALTQEQKK;GILAADESVGTMGNR;GIVVGIKLDQGGAPLAGTNK;IADQCPSSLAIQENANALAR;IKVENTEENR;KELSEIAQSIVANGK;KYTPEQVAMATVTALHR;LDQGGAPLAGTNK;LDQGGAPLAGTNKETTIQGLDGLSER;LSFSYGR;VLAAVYK;YASICQQNGLVPIVEPEVIPDGDHDLEHCQYVTEK;YTPEQVAMATVTALHR	1;1;1;1;1;1;1;1;1;1;1;1;1;1;1;1;1;1;1;1;1;1;0;1;1	24	392	0.6648	382535;382537;830991;830989;830990;830985;830986;831057;830983;832344;832343;830988;830987;830984;832336;832342;832340;832594;832341;832339;832473;832474;832476;832591;270105;270093;270090;270119;270087;270063;270085;270082;270068;270111;270099;270097;270127;270042;270088;269996;270092;269954;115138;115133;115140;122544;16714;16724;16717;169662;169679;157550;157543;165407;158056;251767;103861;103…	-	Fructose-bisphosphate aldolase B OS=Homo sapiens GN=ALDOB PE=1 SV=2
3948_1	sp|Q92820|GGH_HUMAN	57.6091	0	35941.2	DYEILFK;FFNVLTTNTDGK;IEFISTMEGYK;KFFNVLTTNTDGK;LDLTEKDYEILFK;NLDGISHAPNAVK;NNHHFK;SINGILFPGGSVDLR;SINGILFPGGSVDLRR;WSLSVK;YLESAGAR;YPVYGVQWHPEK;YYIAASYVK	1;1;1;1;1;1;1;1;1;1;1;1;1	13	29	0.3365	96658;335539;335530;322482;408591;409123;483013;483007;483008;324299;323811;323821;324243;38540;441381;441377;441378;441370;441392;522165;522168;9554;9557;70200;417950;417932;168680;168681;168703	-	Gamma-glutamyl hydrolase OS=Homo sapiens GN=GGH PE=1 SV=2
7538_1	sp|O43399|TPD54_HUMAN	36.7811	0	22224.3	KTQETLSQAGQK;LGLSTLGELK;RLGLSTLGELK;SWHDVQVSSAYVK;TSAALSTVGSAISR;VEEEIVTLR;VTQSDLYK;VTQSDLYKK	1;1;1;1;1;1;1;1	8	16	0.3252	313659;147084;147095;237553;419679;420156;314981;314986;314984;314998;314985;174962;174992;109277;109303;171136	-	Tumor protein D54 OS=Homo sapiens GN=TPD52L2 PE=1 SV=2
7263_1	sp|Q6N063|OGFD2_HUMAN	11.4495	0.000204499	38971.5	EPDLVDDEGFGDGFTR;LETVSEEK;YGLHVR	1;1;1	3	3	0.0857	554269;100290;18775	-	2-oxoglutarate and iron-dependent oxygenase domain-containing protein 2 OS=Homo sapiens GN=OGFOD2 PE=2 SV=2
7823_1	sp|Q13608|PEX6_HUMAN	6.6724	0.00187688	103996	LLALGSGAWVR;SGLLLHGPPGTGK	1;1	2	2	0.0245	209532;263848	-	Peroxisome assembly factor 2 OS=Homo sapiens GN=PEX6 PE=1 SV=2
1412_1	sp|Q9HAF1|EAF6_HUMAN	12.3127	0.000204499	21621.9	AAPPQIPDTR;KQELAETLANLER;YLTNQK	1;1;1	3	3	0.1518	163578;424690;27664	-	Chromatin modification-related protein MEAF6 OS=Homo sapiens GN=MEAF6 PE=1 SV=1
4005_1	sp|P38435|VKGC_HUMAN	33.7966	0	87504.8	AAPQPSVSCVYK;DKAELISGPR;GGPEPTPLVQTFLR;LVTLLNRPTDPASLAVFR;MQLPAGEYHK;RNTPFHER;TGELGYLNPGVFTQSR;VDIVQAAWSPFQR	1;1;1;1;1;1;1;1	8	13	0.1332	306180;173413;173372;423242;423238;423235;637748;229227;229225;158770;540776;540777;426345	-	Vitamin K-dependent gamma-carboxylase OS=Homo sapiens GN=GGCX PE=1 SV=2
2953_1	sp|Q8IZQ1|WDFY3_HUMAN	11.6296	0.000204499	395006	LASQALEPMVLR;LGPTHFLEEVLPSSNVTTIYELGPNYVGSFQAVCMPCK;LLDILLK;VLIIDNLCLTPASK	1;1;1;1	4	5	0.0201	319538;885079;51484;51489;447411	-	WD repeat and FYVE domain-containing protein 3 OS=Homo sapiens GN=WDFY3 PE=1 SV=2
310_1	sp|P15586|GNS_HUMAN	19.2824	0.000204499	62042	IQEPNTFPAILR;SDVLVEYQGEGR;SMCGYQTFFAGK;TQMDGMSLLPILR	1;1;1;1	4	5	0.0888	359790;359780;332345;358388;403288	-	N-acetylglucosamine-6-sulfatase OS=Homo sapiens GN=GNS PE=1 SV=3
1902_1	sp|P49321|NASP_HUMAN	24.0544	0.000204499	85186.1	EAQLYAAQAHLK;EIEELKELLPEIR;ELLPEIR;LLGLGQK;SGNVAELALK;SLLELAR	1;1;1;1;1;1	6	11	0.0622	327627;327615;327623;474869;71473;13225;13231;133220;40733;40725;40758	-	Nuclear autoantigenic sperm protein OS=Homo sapiens GN=NASP PE=1 SV=2
4339_1	sp|Q99747|SNAG_HUMAN	62.239	0	34724.3	ALFHAAK;ASMMYLENGTPDTAAMALER;AVQLYQQTANVFENEER;AYEQAGMMLK;EMQKLPEAVQLIEK;FDEAALSIQK;INEGLEHLAK;LGLSLVVPGGGIK;LIENVDPEK;LPEAVQLIEK;QAVELLGK;RFDEAALSIQK;TIAQVLVHLHR	1;1;1;1;1;1;1;1;1;1;1;1;1	13	31	0.4167	23791;693366;693609;693364;655319;655315;218551;208576;218549;229135;218553;498655;498650;498657;498652;195744;196905;251559;251556;251564;158854;207921;207923;207925;65970;65994;65988;289498;289505;289446;294718	-	Gamma-soluble NSF attachment protein OS=Homo sapiens GN=NAPG PE=1 SV=1
7082_1	sp|E9PRG8|CK098_HUMAN	6.11616	0.00351617	13789.6	VVGAVIDQGLITR	1	1	1	0.1066	326493	-	Uncharacterized protein C11orf98 OS=Homo sapiens GN=C11orf98 PE=4 SV=1
8442_1	sp|P55056|APOC4_HUMAN	9.06581	0.00039093	14543.5	AWFLESK;MKELLETVVNR;THSLCPR	1;1;1	3	3	0.1969	77134;321775;71766	-	Apolipoprotein C-IV OS=Homo sapiens GN=APOC4 PE=1 SV=1
1130_3	sp|P02748|CO9_HUMAN	35.2277	0	63132.7	AIEDYINEFSVR;ALPTTYEK;DRDGNTLTYYR;LSPIYNLVPVK;NRDVVLTTTFVDDIK;SIEVFGQFNGK;TSNFNAAISLK;YAFELK	1;1;1;1;1;1;1;0	7	8	0.1521	392410;95146;345152;269576;269577;540048;259473;224195;28998;28997	-	Complement component C9 OS=Homo sapiens GN=C9 PE=1 SV=2
1616_1	sp|O15371|EIF3D_HUMAN	96.3452	0	63932.4	CEHDGVMTGANGEVSFINIK;DMPYQPFSK;DNSDFDLLTVSETANEPPQDEGNSFNSPR;FMTPVIQDNPSGWGPCAVPEQFR;GAVIATELK;GAVIATELKNNSYK;HCNGVDWR;IFHTVTTTDDPVIR;IFHTVTTTDDPVIRK;LGDDIDLIVR;NLAMEATYINHNFSQQCLR;SVYSWDIVVQR;VADWTGATYQDKR;WTCCALLAGSEYLK;YLEVSEPQDIECCGALEYYDK;YLILKDPNK;YNFPNPNPFVEDDMDKNEIASVAYR;YSSQFGGGSQYAYFHEEDESSFQLVDTAR	1;1;1;1;1;1;1;1;1;1;1;1;1;1;1;1;1;1	18	72	0.4909	695098;200140;189856;189840;189868;189820;847921;847919;847855;847801;788870;85820;420961;420969;151404;476884;476871;476882;476880;476881;542770;542771;542777;200448;200447;728602;732268;728599;728605;732269;729004;729009;728841;332542;332531;332579;332537;332539;332526;422356;422348;422362;422379;422360;422339;422988;507075;781053;781038;781269;781052;781080;184915;184916;184919;826872;826706;8…	-	Eukaryotic translation initiation factor 3 subunit D OS=Homo sapiens GN=EIF3D PE=1 SV=1
5517_1	sp|Q9NPF4|OSGEP_HUMAN	42.903	0	36403.3	AMAHCGSQEALIVGGVGCNVR;IGVGVVR;ISNDPSPGYNIEQMAK;LITGATSPTVLYVSGGNTQVIAYSEHR;LQEMMATMCQER;LVELPYTVK;PAVLGFEGSANK;TPLSDSGVTQR;TVAQLWNKPLVGVNHCIGHIEMGR;TYVTPPGTGFLPGDTAR	1;1;1;1;1;1;1;1;1;1	10	15	0.4657	697656;395;552699;559038;814959;815052;431337;161804;239177;239189;220669;220696;801424;545837;545835	-	Probable tRNA N6-adenosine threonylcarbamoyltransferase OS=Homo sapiens GN=OSGEP PE=1 SV=1
4627_1	sp|O96011|PX11B_HUMAN	30.6367	0	28413.2	ALYFACDNVLWAGK;AVHLSDVVLR;FSAQSQAR;GHPPLLLDVVR;HGASPELQK;LGNSADALESAK;LQVLLLAR;QLESHLSLGR	1;1;1;1;1;1;1;1	8	9	0.3166	483451;188046;81967;255083;116278;230333;230273;96145;207825	-	Peroxisomal membrane protein 11B OS=Homo sapiens GN=PEX11B PE=1 SV=1
6201_2	sp|P06737|PYGL_HUMAN	182.135	0	97087	AAPGYHMAK;APNDFNLR;AWELTQK;AWNTMVLK;DFSELEPDKFQNK;DGWQVEEADDWLR;DIINMLFYHDR;DYYFALAHTVR;EYAQNIWNVEPSDLK;EYYEALPELK;FSQFLETEYK;GIVGVENVAELK;GIVGVENVAELKK;HLEIIYEINQK;IDDVAALDKK;IFVDIEK;IFVDIEKLPWSK;IGEDYVKDLSQLTK;IHEYKR;IHSDIVK;INMAHLCIVGSHAVNGVAK;INPSSMFDVQVK;IRDGWQVEEADDWLR;ISLSNESNK;ISLSNESNKVNGN;IVALFPK;LHSFLGDDVFLR;LITSVADVVNNDPMVGSK;LVIDQIDNGFFSPK;MSLIEEEGSKR;NLAENISR;QLLNCLHVITMYNR;QPDLFK;S…	0;1;1;1;1;1;1;1;1;1;1;1;1;1;1;1;1;1;0;1;1;1;1;1;1;1;1;1;1;1;0;1;1;1;1;0;1;0;1;0;1;1;1;0	37	115	0.5301	105273;105271;113714;113716;105272;105252;105924;105925;105923;74559;121705;114371;114368;467870;478596;381434;334879;334878;570562;276321;297078;297075;297071;260534;335217;335223;335219;360236;360240;360229;360223;360230;360211;174951;174961;68656;403405;403423;403424;403426;473912;59918;44503;640516;640524;640510;641074;641061;640514;340334;349512;340347;340316;602847;127953;346768;347233;3523…	-	Glycogen phosphorylase, liver form OS=Homo sapiens GN=PYGL PE=1 SV=4
6201_1	sp|P11216|PYGB_HUMAN	93.8641	0	96634.5	AAPGYHMAK;ARPEYMLPVHFYGR;DFYELEPEK;DIVNMLMHHDR;DYFFALAHTVR;EYYDHLPELK;HLDHVAALFPGDVDR;IGEEFLTDLSQLK;IGEEFLTDLSQLKK;IHEYKR;INMAHLCVIGSHAVNGVAR;INPSSMFDVHVK;KLLPLVSDEVFIR;LLPLVSDEVFIR;LVTSIGDVVNHDPVVGDR;NLAENISR;QAVDQISSGFFSPK;QLLNCLHVVTLYNR;TCAYTNHTVLPEALER;TNGITPR;VEHTPDGVK;VIFLENYR;VIPAADLSQQISTAGTEASGTGNMK;VLYPNDNFFEGK;YEFGIFNQK;YGNPWEK	0;1;1;1;1;1;1;1;1;0;1;1;1;1;1;0;1;1;1;0;1;0;1;0;1;0	19	33	0.3428	105273;105271;113714;113716;105272;105252;539536;226236;349398;325733;306136;501661;501637;501649;501675;501643;501632;412729;412715;479978;479974;479975;59918;649674;345306;345309;432328;360845;360851;360854;604683;604681;93093;93088;422462;543121;542778;598068;598073;24275;24915;123116;157293;157299;157290;157291;756363;384754;384755;384753;384756;384750;384752;384759;384762;210865;81463	-	Glycogen phosphorylase, brain form OS=Homo sapiens GN=PYGB PE=1 SV=5
1189_1	sp|Q15717|ELAV1_HUMAN	66.1068	0	36069.1	AINTLNGLR;DANLYISGLPR;DVEDMFSR;FAANPNQNK;FGGPVHHQAQR;NVALLSQLYHSPAR;RSEAEEAITSFNGHKPPGSSEPITVK;SEAEEAITSFNGHKPPGSSEPITVK;SLFSSIGEVESAK;TNLIVNYLPQNMTQDELR;VAGHSLGYGFVNYVTAK;VIRDFNTNK;VLVDQTTGLSR	1;1;1;1;1;1;1;1;1;1;1;1;1	13	59	0.4785	118854;118471;118446;118462;118856;118878;118494;256653;256657;256662;131522;134118;134117;134113;134116;263582;263572;263586;263567;263576;453026;453020;453045;453021;453033;453029;453032;453037;806272;806398;786232;786095;786100;786103;786230;333638;333647;333646;333639;690364;690363;690351;694987;690371;695208;690360;690358;694988;690678;560274;560275;560678;560276;186665;238638;238651;238644;…	-	ELAV-like protein 1 OS=Homo sapiens GN=ELAVL1 PE=1 SV=2
1444_1	sp|Q16853|AOC3_HUMAN	73.2052	0	84568.3	AAALAHLDR;DAFCVFEQNQGLPLR;DAFCVFEQNQGLPLRR;EALAIVFFGR;EELTAVMR;ELPQASGLLHHCCFYK;HGGPLPYHR;KLLEMEEQAAFLVGSATPR;LLEMEEQAAFLVGSATPR;NLVTMTTAPR;SPVPPGPAPPLQFYPQGPR;VFYQGR;YGNQVSEHTLGTVHTHSAHFK;YTTPLTR;YVDGGFGMGK	1;1;1;1;1;1;1;1;1;1;1;1;1;1;1	15	30	0.2097	101801;101794;565813;565389;626359;196459;196450;196455;196427;106801;629877;629879;629861;629868;148118;148115;671507;630957;194259;194190;643887;28444;738034;738307;738638;63082;63084;146670;146671;152944	-	Membrane primary amine oxidase OS=Homo sapiens GN=AOC3 PE=1 SV=3
2376_1	sp|Q8WVC0|LEO1_HUMAN	12.2323	0.000204499	75359.3	APLQGDHNHLFIR;QGTGLQGQAVFK	1;1	2	3	0.0375	426820;426831;263686	-	RNA polymerase-associated protein LEO1 OS=Homo sapiens GN=LEO1 PE=1 SV=1
7437_1	sp|Q9NZC7|WWOX_HUMAN	6.11616	0.00351617	46647.2	VIVVSSESHR	1	1	2	0.0242	190043;190053	-	WW domain-containing oxidoreductase OS=Homo sapiens GN=WWOX PE=1 SV=1
1520_1	sp|O15230|LAMA5_HUMAN	65.327	0	399479	APQQGLLSLHPCLYSTLCR;ASPDGLCQVSLQQGR;DGFFGLDQADYFGCR;DQASQLLAGTEATLGHAK;FANSPRPDLWVLER;ISFDSQISTTK;LGGQAVGTR;LSILENR;MQTFSPAGSK;TLLAAIR;TLPQLLAK;TLQFGHMSVTVER;TNTLLGHLMGK;TQCLCKPGYAGASCER;TYQPWQFFASSK;VSCISSHGAFGPNSAACLPSR	1;1;1;1;1;1;1;1;1;1;1;1;1;1;1;1	16	18	0.0558	704821;477241;554247;572702;521399;259930;66427;59267;156994;23994;78487;78484;419312;419367;236242;590917;410790;694087	-	Laminin subunit alpha-5 OS=Homo sapiens GN=LAMA5 PE=1 SV=8
7045_1	sp|Q96NU7|HUTI_HUMAN	54.3802	0	46712.8	AIGPADVIQR;CILPGLVDAHTHPVWAGER;CSAILLPTTAYMLR;GVFDLDSTRR;LQCMMR;NGEIHVDNIDVFCEK;QFSGETFEEIIDCSGK;QGDLIIINSSR;SGYGLDLETELK;SHTHGSLEVGK;SLAVLEGASLVVGK;TATEAADDIINNHLPK	1;1;1;1;1;1;1;1;1;1;1;1	12	23	0.3615	150092;150086;150095;681855;681846;474347;224117;224113;56426;563002;563013;586762;254995;317249;215349;215363;215355;215360;327746;327745;327738;327747;532952	-	Probable imidazolonepropionase OS=Homo sapiens GN=AMDHD1 PE=1 SV=2
2719_1	sp|P31949|S10AB_HUMAN	35.7006	0	11732.8	CIESLIAVFQK;DGYNYTLSK;DPGVLDR;ISSPTETER;NQKDPGVLDR;TEFLSFMNTELAAFTK;YAGKDGYNYTLSK	1;1;1;1;1;1;1	7	26	0.5619	307051;307068;307050;307049;160845;160849;160846;160834;160850;160847;160841;29291;29288;29292;29285;29289;29286;141728;141735;141732;141722;208803;594267;594278;406046;406043	-	Protein S100-A11 OS=Homo sapiens GN=S100A11 PE=1 SV=2
3662_1	sp|Q96GX9|MTNB_HUMAN	52.2557	0	27107.2	AAVMATLLFPGR;CTSGGYYR;DISGPSPSKK;GAGAVIHTHSK;HGDEIYIAPSGVQK;HGVYVWGETWEK;KVGLDPSQLPVGENGIV;MAHAMNEYPDSCAVLVR;SQCTPLFMNAYTMR;YDDMLVVPIIENTPEEK;YLIPELCK	1;1;1;1;1;1;1;1;1;1;1	11	19	0.5785	271987;271990;271985;271988;114590;139820;168749;168735;424040;411410;532576;631736;631730;631737;636686;636683;531447;644764;148814	-	Methylthioribulose-1-phosphate dehydratase OS=Homo sapiens GN=APIP PE=1 SV=1
325_1	sp|Q9UBX1|CATF_HUMAN	18.1352	0.000204499	53331.8	ACMGGLPSNAYSAIK;GYYYLHR;LAAWLAK;NSWGTDWGEK;SDVPFWAIK	1;1;1;1;1	5	11	0.0992	446297;438559;438566;446301;438552;118226;29961;29959;232656;162068;162054	-	Cathepsin F OS=Homo sapiens GN=CTSF PE=1 SV=1
942_1	sp|Q01081|U2AF1_HUMAN	9.04472	0.00039093	27854.5	AVIDLNNR;DKVNCSFYFK;YGEVEEMNVCDNLGDHLVGNVYVK	1;1;1	3	4	0.175	92014;306721;306711;806441	sp|P0DN76|U2AF5_HUMAN	Splicing factor U2AF 35 kDa subunit OS=Homo sapiens GN=U2AF1 PE=1 SV=3
5074_1	sp|P55209|NP1L1_HUMAN	24.4646	0.000204499	45345.9	FYEEVHDLER;FYEEVHDLERK;LDGLVETPTGYIESLPR;NVDLLSDMVQEHDEPILK;YAVLYQPLFDK;YAVLYQPLFDKR	0;0;1;1;1;1	4	28	0.1483	324044;324042;324045;324039;324056;397507;591938;591913;591921;591923;591934;591918;591914;591919;591933;591911;591920;591929;591939;672437;672441;672436;672658;676868;677362;672435;335635;423680;423673;423668;423666;423670;423671;423667	-	Nucleosome assembly protein 1-like 1 OS=Homo sapiens GN=NAP1L1 PE=1 SV=1
5074_2	sp|Q99733|NP1L4_HUMAN	38.1048	0	42796.9	AAATAEEPDPK;FYEEVHDLER;FYEEVHDLERK;KYAALYQPLFDK;LDNVPHTPSSYIETLPK;LTDQVMQNPR;VLAALQER;YAALYQPLFDK;YAALYQPLFDKR	1;0;0;1;1;1;1;1;1	7	16	0.184	182118;324044;324042;324045;324039;324056;397507;393018;392997;393015;612194;612190;612197;612193;612618;612183;612195;246015;84317;319938;319937;408633	-	Nucleosome assembly protein 1-like 4 OS=Homo sapiens GN=NAP1L4 PE=1 SV=1
8449_1	sp|O76071|CIAO1_HUMAN	46.1871	0	37815.8	CICTLSGFHSR;DSLVLLGR;EPGLLASCSDDGEVAFWK;HVVWHPSQELLASASYDDTVK;IWGTEGDSWICK;MKDSLVLLGR;NQDDFECVTTLEGHENEVK;QYLPGNEQGVACSGSDPSWK;SVAWAPSGNLLATCSR	1;1;1;1;1;1;1;1;1	9	19	0.3746	324530;324537;73433;636939;636976;744762;744760;744771;390189;390202;212310;202750;212312;202749;202748;212308;718047;695371;516880	-	Probable cytosolic iron-sulfur protein assembly protein CIAO1 OS=Homo sapiens GN=CIAO1 PE=1 SV=1
7926_1	sp|P49961|ENTP1_HUMAN	11.6484	0.000204499	57927.1	AREVIPR;SLSNYPFDFQGAR;SQHQETPVYLGATAGMR	1;1;1	3	3	0.0725	57453;417290;586466	-	Ectonucleoside triphosphate diphosphohydrolase 1 OS=Homo sapiens GN=ENTPD1 PE=1 SV=1
3741_1	sp|Q9UBF8|PI4KB_HUMAN	12.931	0.000204499	91321.4	LISELSLLNHK;LLHGGVAVSSR;VWLPTAGFDHHVVR	1;1;1	3	4	0.0441	282830;180241;486747;486742	-	Phosphatidylinositol 4-kinase beta OS=Homo sapiens GN=PI4KB PE=1 SV=1
8177_1	sp|O14662|STX16_HUMAN	8.35313	0.00039093	37008.2	HAQSGYLK;LTDAFLLLR	1;1	2	2	0.0523	86648;161810	-	Syntaxin-16 OS=Homo sapiens GN=STX16 PE=1 SV=3
5465_1	sp|Q969S3|ZN622_HUMAN	30.3105	0	54237.4	ALGWTGSTGAALMR;FASFNAYENHLK;GLGVDSVDKDAMNAAIQQAIK;GSATYCTVCSK;HVELEK;NVAHMTK;VASMAPVTAEGFQER	1;1;1;1;1;1;1	7	13	0.1803	355710;383699;685888;263325;22535;40099;40103;465848;465854;473647;465867;466412;473632	-	Zinc finger protein 622 OS=Homo sapiens GN=ZNF622 PE=1 SV=1
5604_1	sp|Q8WUP2|FBLI1_HUMAN	20.4007	0.000204499	40642.7	DGRPLCEPCYQDTLER;FAPVCSICENPIIPR;GASTDICAFCHK;QLAGQSFYQK;TPEAGLAGRPSPWTTPGR	1;1;1;1;1	5	7	0.1903	645854;556058;556057;341153;226364;588580;588574	-	Filamin-binding LIM protein 1 OS=Homo sapiens GN=FBLIM1 PE=1 SV=2
1748_1	sp|Q9NZU5|LMCD1_HUMAN	61.7623	0	40806.1	DPTFDTITYEWAPPGVTQK;EKQPVTGTEGAFYR;GAAPPDSPVVYSDR;GQLLCPTCSK;GTCSGFEPHSWR;HFVCEGCEQLLSGR;LGLQYMELIPK;LMEEFVK;MIMTNPIATGK;MSLGQLQSAR;QLMHQLPIYDQDPSR;QPVTGTEGAFYR;SEALGVGEVALPGQGGLPK	1;1;1;1;1;1;1;1;1;1;1;1;1	13	24	0.4274	691450;691432;691775;691442;460166;460618;378019;222533;222530;222524;222531;372580;372581;517189;517179;517180;305254;305257;82647;231097;186574;591069;317712;558855	-	LIM and cysteine-rich domains protein 1 OS=Homo sapiens GN=LMCD1 PE=1 SV=1
6552_1	sp|Q9UJ83|HACL1_HUMAN	87.1085	0	63687.3	AQDFHWLTR;CMSPPISMAETSAVCTAASVIR;DCFVVSEGANTMDIGR;FSARPSSIEAIPFVIEK;GAAYAHAEESIK;GAAYAHAEESIKK;GVVPDNHPYCVGAAR;GYFVQTPEELQK;KAQDFHWLTR;LNWILHFGLPPR;LPFLPTPMGK;NQETMGAFQEFPQVEACR;PDSNFAER;QLLEELDKTPWQYPPESK;QPLLIIGK;QSLADTTKPSLINIMIEPQATR;TVLQNYLPR;VIAQALK	1;1;1;1;1;1;1;1;1;1;1;1;1;1;1;1;1;1	18	70	0.3754	229255;739197;555041;604274;604276;271707;345904;345891;345900;475050;475035;475029;475042;475053;475559;475055;382579;303181;303270;303192;303138;303164;303888;396636;396630;396631;396633;397342;182938;182940;182935;182941;192275;685013;689443;685390;685016;100639;100637;701236;701222;701492;701245;701241;701233;701226;77677;77673;77672;753192;753181;753179;753182;753184;753187;753185;755695;753…	-	2-hydroxyacyl-CoA lyase 1 OS=Homo sapiens GN=HACL1 PE=1 SV=2
1327_1	sp|Q9UQB8|BAIP2_HUMAN	115.714	0	60829.6	AFPAQTASGFK;AIFSHAAGDNSTLLSFK;ALAGVTYAAK;AVQLMQQVASNGATLPSALSASK;EGDLITLLVPEAR;ELGDVLFQMAEVHR;FCFLVEK;GKELLAQK;GWFPFSYTR;GYFDALVK;LPLWQQACADPSKIPER;LSDSYSNTLPVR;LTENVYK;MGELASESQGSK;NFIAMGK;QGELENYVSDGYK;QIQNQLEEMLK;QRPYSVAVPAFSQGLDDYGAR;SEEMHR;SFHNELLTQLEQK;SSSTGNLLDKDDLAIPPPDYGAASR;TIMEQFNPSLR;YLSAALK;YSDKELQYIDAISNK	1;1;1;1;1;1;1;1;1;1;1;1;1;1;1;1;1;1;1;1;1;1;1;1	24	42	0.538	197545;197534;559168;115462;720423;719836;375840;375841;375848;491804;491795;491796;492395;103602;79448;220538;220537;91002;91003;646006;646264;332508;70293;258580;32461;32709;417840;345375;354582;345929;725910;35285;462166;462157;462180;777442;323726;333116;27472;562144;562121;562594	-	Brain-specific angiogenesis inhibitor 1-associated protein 2 OS=Homo sapiens GN=BAIAP2 PE=1 SV=1
1459_1	sp|Q5GLZ8|HERC4_HUMAN	57.7053	0	118487	ENIVGDAMEVLR;FGQLGLNDENDRYVPNLLK;FSGVDMNAAR;HTVFVLDDGTVYTCGCNDLGQLGHEK;IFSGGDQSFSHYSSPQNCGPPDDFR;IVYICCGEDHTAALTK;LIQPDHPQISQQVAASLEK;NTEYKGEYWAEHPTIK;QFLLFLTGSDR;QHTSAFVPSSGR;RENIVGDAMEVLR;VIFVGEDAVDAGGVRK;YGQLGLGTDCK	1;1;1;1;1;1;1;1;1;1;1;1;1	13	21	0.1835	329152;702697;164295;825700;825697;810821;810820;588449;588440;674724;675202;632750;300199;286382;287176;286441;286408;417469;485946;485940;252277	-	Probable E3 ubiquitin-protein ligase HERC4 OS=Homo sapiens GN=HERC4 PE=1 SV=1
1494_3	sp|P45974|UBP5_HUMAN	94.742	0	95725.3	DGLGGLPDIVR;EEDPATGTGDPPR;ETGYPLAVK;FLVEEK;FTFGLDWVPK;GHPEFSTNR;GTGLQPGEEELPDIAPPLVTPDEPK;HAFSLK;IFQNAPTDPTQDFSTQVAK;IVILPDYLEIAR;KFTFGLDWVPK;KQEVQAWDGEVR;LGHGLLSGEYSKPVPESGDGER;LGHGLLSGEYSKPVPESGDGERVPEQK;MALPELVR;SAADSISESVPVGPK;SSENPNEVFR;TMTELEIDMNQR;VCASEKPPKDLGYIYFYQR;VTSAVEALLSADSASR;VYLHLR;YFDGSGGNNHAVEHYR	1;1;1;1;0;1;1;1;1;1;0;1;1;1;1;1;1;1;1;1;1;1	20	55	0.3054	189597;189605;189607;326651;326661;121336;121350;27093;251335;152018;152015;784151;784326;784150;784324;784330;2274;2286;2290;676039;676042;676032;369624;369619;369623;369627;369621;369620;369618;324846;385908;385913;385901;386585;722686;722683;818264;818265;818352;818263;97207;97201;97204;385377;385375;232265;406553;734521;457162;457169;457199;457172;457176;40254;577755;577475;577458	-	Ubiquitin carboxyl-terminal hydrolase 5 OS=Homo sapiens GN=USP5 PE=1 SV=2
1494_2	sp|Q92995|UBP13_HUMAN	6.11616	0.00351617	97265	FTFGLDWVPK;KFTFGLDWVPK;YANNLTQLDNGVR	0;0;1	1	1	0.0278	251335;324846;404933	-	Ubiquitin carboxyl-terminal hydrolase 13 OS=Homo sapiens GN=USP13 PE=1 SV=2
721_1	sp|Q8TDB6|DTX3L_HUMAN	97.1018	0	83501.3	AGIQTEEHPNPGK;AGIQTEEHPNPGKR;FADDFR;FGGPEMYGYPDPSYLK;FKQELNHQFTK;GGELTLLGTQDDISAAK;GICVICMDTISNK;GICVICMDTISNKK;GNQPEGSMVFTVSR;GSVSSEASELDKK;HEFCAPCINK;IHQFLSEQFLESEQK;ISEAFVK;KGEHQILVDEKPVPIFLVPTENSIK;KPLSQQER;LESYFQSSK;NTRPQISSLTQSQAETPSGDMHQHEGHIPNAVDSCLQK;SSGGGECTVSTQEHEAPGTFR;VLGVSDVITWNDIHHK;YICPDKINSIEK	1;1;1;1;1;1;1;1;1;1;1;1;1;1;1;1;1;1;1;1	20	35	0.3595	347341;435346;28916;576683;372216;516105;422301;489365;489361;421245;421233;421256;421247;421786;429877;429878;324140;287915;593147;593140;37429;814411;124906;175528;884421;884445;884433;699270;699518;581384;581382;581393;581379;406197;406180	-	E3 ubiquitin-protein ligase DTX3L OS=Homo sapiens GN=DTX3L PE=1 SV=1
3512_1	sp|Q9BRG1|VPS25_HUMAN	35.4149	0	20734.5	ALQALQQEHK;ALQALQQEHKAEIITVSDGR;FPPFFTLQPNVDTR;GNLEWLDK;KGNLEWLDK;LIYQWVSR;QSSMTVMEAQESPLFNNVK;SSFLIMWR	1;1;1;1;1;1;1;1	8	35	0.4432	224243;703304;510954;510948;510937;510944;510938;510942;510950;510935;510949;510924;510943;510934;510945;510912;511399;510890;510930;510947;510941;510939;119689;184129;184124;163171;684505;688657;684498;685104;685107;689229;150025;150031;150038	-	Vacuolar protein-sorting-associated protein 25 OS=Homo sapiens GN=VPS25 PE=1 SV=1
5807_1	sp|P13804|ETFA_HUMAN	82.2059	0	35057.6	AAVDAGFVPNDMQVGQTGK;ASSTSPVEISEWLDQK;CDKVAQDLCK;GLLPEELTPLILATQK;GTSFDAAATSGGSASSEK;LEVAPISDIIAIK;LGGEVSCLVAGTK;LLYDLADQLHAAVGASR;QFNYTHICAGASAFGK;SDRPELTGAK;SPDTFVR;TIVAINK;TIYAGNALCTVK;VLVAQHDVYK;VVPEMTEILK;VVPEMTEILKK	1;1;1;1;1;1;1;1;1;1;1;1;1;1;1;1	16	403	0.5856	616011;609341;609339;609354;609343;609328;616353;615998;609340;609331;609351;609670;609356;609336;609689;609334;609738;616000;609337;609369;609353;616009;609358;616023;616360;609690;609752;609695;609363;609680;609678;609754;615997;609352;609373;616358;609666;609364;610122;615996;609744;610126;609720;616018;609737;609711;616369;557910;557913;557887;557908;557893;557915;557912;557889;557900;557883;…	-	Electron transfer flavoprotein subunit alpha, mitochondrial OS=Homo sapiens GN=ETFA PE=1 SV=1
3178_1	sp|Q96K17|BT3L4_HUMAN	15.7009	0.000204499	17260	LAEQFPR;LAVNNIAGIEEVNMIK;LAVNNIAGIEEVNMIKDDGTVIHFNNPK	1;1;1	3	4	0.2215	67189;67179;535527;836848	-	Transcription factor BTF3 homolog 4 OS=Homo sapiens GN=BTF3L4 PE=1 SV=1
7223_1	sp|Q6PCE3|PGM2L_HUMAN	27.2854	0	70396.5	EGFHFEETLPGFK;FCGTFAILHVR;GFVVGYDTR;NGLIWR;NVYMLATTVSSK;TKEQIENLLR	1;1;1;1;1;1	6	6	0.0981	437501;314859;138741;24309;310157;270193	-	Glucose 1,6-bisphosphate synthase OS=Homo sapiens GN=PGM2L1 PE=1 SV=3
4055_1	sp|Q86VM9|ZCH18_HUMAN	19.8693	0.000204499	106315	ASDLEDEESAAR;AVEDAIAR;GNYSLITK;LGVSVSPSR;SQDQDSEVNELSR;SSQQPSTPQQAPPGQPQQGTFVAHK	1;1;1;1;1;1	6	6	0.0787	297577;59157;82726;85587;420037;788891	-	Zinc finger CCCH domain-containing protein 18 OS=Homo sapiens GN=ZC3H18 PE=1 SV=2
3590_1	sp|Q9BZQ8|NIBAN_HUMAN	10.5025	0.000204499	103070	FSALLSDCVR;VLTSEDEYNLLSDR	1;1	2	2	0.0259	225169;498007	-	Protein Niban OS=Homo sapiens GN=FAM129A PE=1 SV=1
4636_1	sp|O43237|DC1L2_HUMAN	42.4798	0	54065.5	CNVWILDGDLYHK;DAVFIPAGWDNEKK;DEHLDFIQSHLR;ELAAEDEQVFLMK;GGPASVPSSSPGTSVK;KPDPNIK;LVHDKELAAEDEQVFLMK;NILVFGEDGSGK;NLDLLYK;TGSPGSPGAGGVQSTAKK;TVLSNVQEELDR	0;1;1;1;1;1;1;1;1;1;1	10	16	0.2622	486124;486136;463876;421829;421822;421830;421820;429591;369369;44507;677912;677917;264785;76465;462147;462156;361855;361867	-	Cytoplasmic dynein 1 light intermediate chain 2 OS=Homo sapiens GN=DYNC1LI2 PE=1 SV=1
753_2	sp|P05388|RLA0_HUMAN	34.0369	0	34251.8	AFLADPSAFVAAAPVAAATTAAPAAAAAPAK;AFLADPSAFVAAAPVAAATTAAPAAAAAPAKVEAK;AGAIAPCEVTVPAQNTGLGPEK;AVVLMGK;CFIVGADNVGSK;DMLLANK;DMLLANKVPAAAR;EDLTEIR;EDLTEIRDMLLANK;FLEGVR;GHLENNPALEK;GNVGFVFTK;GNVGFVFTKEDLTEIR;GTIEILSDVQLIK;IIQLLDDYPK;LLPHIR;QMQQIR;SNYFLK;TSFFQALGITTK;VLALSVETDYTFPLAEK	1;1;1;1;1;1;1;1;1;1;1;1;1;1;1;1;1;1;1;1	20	95	0.6057	804223;804216;804222;804220;804218;804215;804219;804217;804221;846328;695539;695528;695531;695536;695851;695848;695849;695532;695540;696100;15667;8918;8921;15664;282558;282546;282563;283028;283034;41886;343428;343422;343432;343436;352518;343379;343413;352510;352511;353027;353012;74486;74488;74476;501226;509915;501206;509908;501220;501196;9877;257834;257841;257836;117205;117207;117201;117196;11719…	-	60S acidic ribosomal protein P0 OS=Homo sapiens GN=RPLP0 PE=1 SV=1
3185_1	sp|Q8NHV1|GIMA7_HUMAN	14.7646	0.000204499	34486.7	DLLVVDTPGLFDTK;IAAQAVTK;SATANTILGEEIFDSR	1;1;1	3	4	0.1267	434991;40760;533750;533708	-	GTPase IMAP family member 7 OS=Homo sapiens GN=GIMAP7 PE=1 SV=1
248_2	sp|P61601|NCALD_HUMAN	17.0395	0.000204499	22230.9	AEMLEIVQAIYK;EFIIALSVTSR;FAEHVFR;IYGNFFPYGDASK;LSLEEFIR;MPEDESTPEKR;MVSSVMK;WAFSMYDLDGNGYISK	1;0;0;1;0;0;0;1	3	5	0.4404	365480;365483;365489;265016;87550;87555;405397;135708;135700;135694;135698;313414;313418;313417;38863;38861;38864;594639	-	Neurocalcin-delta OS=Homo sapiens GN=NCALD PE=1 SV=2
248_3	sp|P37235|HPCL1_HUMAN	19.0933	0.000204499	22299	DCPTGHLTVDEFKK;EFIIALSVTSR;ENTEFTDHELQEWYK;FAEHVFR;IYANFFPYGDASK;LRPEVLQDLR;LSLEEFIR;MPEDESTPEKR;MVSSVMK;SEMLEIVQAIYK;TFDTNGDGTIDFR	1;0;1;0;1;1;0;0;0;1;1	6	14	0.6269	493257;265016;633530;633201;633203;87550;87555;412527;412529;413039;266945;266949;266951;266952;135708;135700;135694;135698;313414;313418;313417;38863;38861;38864;374759;383232;393758	-	Hippocalcin-like protein 1 OS=Homo sapiens GN=HPCAL1 PE=1 SV=3
2599_1	sp|Q92786|PROX1_HUMAN	24.7322	0.000204499	83151	EFFNAIIAGK;FLEVAQITLR;LDSEVPEIFK;LMFFYTR;LPQQQQQSFQQLVSAR;VENIIR	1;1;1;1;1;1	6	7	0.0801	188526;239385;239384;231094;121199;602683;18477	-	Prospero homeobox protein 1 OS=Homo sapiens GN=PROX1 PE=1 SV=2
4665_1	sp|Q8WV28|BLNK_HUMAN	9.22308	0.000204499	50435.4	DGSFLIR;NGEEYFGSVAEIIR	1;1	2	2	0.0461	43006;460567	-	B-cell linker protein OS=Homo sapiens GN=BLNK PE=1 SV=2
2572_1	sp|Q01844|EWS_HUMAN	32.2779	0	68435.7	AAVEWFDGK;AAVEWFDGKDFQGSK;AGDWQCPNPGCGNQNFAWR;GDATVSYEDPPTAK;TGQPMIHIYLDK;TGQPMIHIYLDKETGKPK	1;1;1;1;1;1	6	25	0.1006	142987;142983;513784;513772;513781;513782;513771;513777;513755;513783;710427;710424;710421;710422;710653;710423;710426;710651;710884;389513;369967;660586;660590;660589;660583	-	RNA-binding protein EWS OS=Homo sapiens GN=EWSR1 PE=1 SV=1
8145_1	sp|P46108|CRK_HUMAN	27.0974	0.000204499	33810	ALFDFNGNDEEDLPFK;HGVFLVR;IHYLDTTTLIEPVSR;INVSGQWEGECNGKR;TALALEVGELVK	1;1;1;1;1	5	7	0.2138	596519;51309;549543;538404;538405;269555;269549	-	Adapter molecule crk OS=Homo sapiens GN=CRK PE=1 SV=2
560_1	sp|Q05823|RN5A_HUMAN	10.1526	0.000204499	83480.5	HLGLVQR;LLQPGPSEHSK;NVLSSIFK	1;1;1	3	3	0.0351	49545;241094;89013	-	2-5A-dependent ribonuclease OS=Homo sapiens GN=RNASEL PE=1 SV=2
2591_2	sp|Q5T8P6|RBM26_HUMAN	37.655	0	113527	ALCIDQLDVFLQK;KAISSTEAVLNNR;KVPPELNNISK;KVQFGNENTK;MIIENFEALK;MQAGEEVTELR;SYLPPPEQPSSGSLK;TLEPICDADPSALAK;TLEVLTK;YTELQLEAAKR;YVLALVK	1;0;1;1;1;1;1;1;1;1;1	10	11	0.1221	450181;362015;266928;223637;250177;290467;462135;470176;41547;315528;315504;42480	-	RNA-binding protein 26 OS=Homo sapiens GN=RBM26 PE=1 SV=3
2591_1	sp|Q9P2N5|RBM27_HUMAN	34.9688	0	118645	AFCADQLDVFLQK;ETSGFVDK;ISQLKDELK;KAISSTEAVLNNR;KIPQELNNITK;LFESLYTK;LSQLQVEAAR;MLIEDVDALK;TSSAVSTPSK	1;1;1;0;1;1;1;1;1	8	9	0.0868	445941;77792;166841;362015;300971;300972;132520;191158;211510;115241	-	RNA-binding protein 27 OS=Homo sapiens GN=RBM27 PE=1 SV=2
7646_1	sp|O14807|RASM_HUMAN	9.76527	0.000204499	23831.4	HNIPYIETSAK;HNIPYIETSAKDPPLNVDK;LVVVGDGGVGK	1;1;1	3	3	0.1442	285986;687525;132230	-	Ras-related protein M-Ras OS=Homo sapiens GN=MRAS PE=1 SV=2
1419_1	sp|Q13428|TCOF_HUMAN	22.9551	0.000204499	152015	GMGTVEGGDQSNPK;GSLGSQGAKDEPEEELQK;LASTNSSVLGADLPSSMK;TGPAAAQVQVGK;TNVVTMPTAHPR;TSQVGAASAPAK	1;1;1;1;1;1	6	6	0.0578	346701;608157;558424;199143;316775;174814	-	Treacle protein OS=Homo sapiens GN=TCOF1 PE=1 SV=3
1493_1	sp|O43414|ERI3_HUMAN	5.30501	0.00588134	37213.7	EGLLDPNVK;NIANIMK	1;1	2	2	0.0475	124491;41357	-	ERI1 exoribonuclease 3 OS=Homo sapiens GN=ERI3 PE=1 SV=2
2535_1	sp|Q96EP0|RNF31_HUMAN	8.52342	0.00039093	119575	AELALSLLQETPR;FNNPVFR	1;1	2	2	0.0187	384594;81586	-	E3 ubiquitin-protein ligase RNF31 OS=Homo sapiens GN=RNF31 PE=1 SV=1
8078_1	sp|O75027|ABCB7_HUMAN	29.3996	0	82589.2	AGAAFFNEVR;LAGLHDAILR;VAISLGFLGGAK;VAIVGGSGSGK;VLSGISFEVPAGK;YDGFLK	1;1;1;1;1;1	6	11	0.0824	170924;170927;169397;169390;169388;169368;203590;203585;98828;304699;18054	-	ATP-binding cassette sub-family B member 7, mitochondrial OS=Homo sapiens GN=ABCB7 PE=1 SV=2
99_1	sp|P23378|GCSP_HUMAN	231.07	0	112657	AGHQLQHDLFFDTLK;AKYTGVLTELK;AYLNQK;AYLNQKGEGHR;CHPQTIAVVQTR;DISLVHSMIPLGSCTMK;DVSGVLFQYPDTEGK;DVSGVLFQYPDTEGKVEDFTELVER;EFANIHPFVPLDQAQGYQQLFR;EVAAFPLPFVKPENK;FCDAMISIR;FGVPLGYGGPHAAFFAVR;FWPTIAR;GIPGSVFK;GYVGHEFILDTRPFK;GYVGHEFILDTRPFKK;HDDFAR;HLAPFLPNHPVISLK;IDDIYGDQHLVCTCPPMEVYESPFSEQK;IDDIYGDQHLVCTCPPMEVYESPFSEQKR;IQCGCSVK;IQPVEVDKYGNIDAVHLK;LETHYR;LFEDGTLGISLDETVNEK;LNSSSELAPITWK;LPCEMDFSGK;…	1;1;1;1;1;1;1;1;1;1;1;1;1;1;1;1;1;1;1;1;1;1;1;1;1;1;1;1;1;1;1;1;1;1;1;1;1;1;1;1;1;1;1;1;1;1	46	231	0.4824	554877;554869;554867;554866;554857;554842;554854;554859;554852;554865;554862;554826;258476;16531;285969;366593;366609;366551;366591;366590;366604;609393;603326;609376;609374;609375;497984;498443;819023;786912;786900;786916;787072;514663;514659;514657;514653;514654;514666;514656;514660;514662;514652;514649;189851;189849;200162;200185;189853;593204;593198;593190;593199;593200;593195;593202;593186;5…	-	Glycine dehydrogenase (decarboxylating), mitochondrial OS=Homo sapiens GN=GLDC PE=1 SV=2
2710_1	sp|Q8N5Z0|AADAT_HUMAN	48.0672	0	47321.3	FITAASAAR;FLYTVPNGNNPTGNSLTSER;FRVPTFLSMDVDGR;IGFLTGPKPLIER;IISSGLR;SMISLAGGLPNPNMFPFK;TIQFGEEMMKR;TMTDILSR;VIDFYSNQK;VKGINDVK;VPTFLSMDVDGR	1;1;1;1;1;1;1;1;1;1;1	11	31	0.2753	88893;88879;88876;88886;695813;695807;695791;696078;696288;696274;696011;695812;696023;696643;489833;383955;383953;383956;19406;616130;343131;101234;101229;108781;108778;108774;101187;190425;73441;324139;324133	-	Kynurenine/alpha-aminoadipate aminotransferase, mitochondrial OS=Homo sapiens GN=AADAT PE=1 SV=2
5238_1	sp|P10619|PPGB_HUMAN	35.3667	0	54431.1	CNFYDNKDLECVTNLQEVAR;DLECVTNLQEVAR;EFSHIAFLTIK;HLHYWFVESQK;LWSSLQTHCCSQNK;SMNSQYLK;YGDSGEQIAGFVK	1;1;1;1;1;1;1	7	24	0.1604	763678;763679;763680;763843;442057;442528;305796;305791;305779;305794;305788;402252;545190;545195;545198;545189;117837;117841;117845;125171;125169;343690;343682;344208	-	Lysosomal protective protein OS=Homo sapiens GN=CTSA PE=1 SV=2
3171_1	sp|Q9UGP8|SEC63_HUMAN	88.221	0	87941.6	AYAALTDEESR;CMWYR;DATSRPTDNILIPQLIR;DTEEVELK;EQSICAAEEQPAEDGQGETNK;EQSICAAEEQPAEDGQGETNKNR;EQTLISMPYHVCTLK;ITHPVYSLYFPEEK;KNEPPLTCPYSLK;LIMVLAGASEFDPQYNK;LSQMAVQGLQQFK;NEPPLTCPYSLK;QNKDDEAEWQELQQSIQR;SDSYMGLDQIKPLK;SPLLQLPHIEEDNLR;SPLLQLPHIEEDNLRR;TIQDLVSLK;VLLLSHLAR;YSGDQILIR	1;1;1;1;1;1;1;1;1;1;1;1;1;1;1;1;1;1;1	19	34	0.2776	259329;45672;617110;114216;724307;724308;777550;576275;576227;576220;532976;532969;532970;442168;442165;606056;405072;413335;371562;371559;713203;467090;556494;556509;556488;556982;556496;556495;619314;140589;142853;142854;142855;163088	-	Translocation protein SEC63 homolog OS=Homo sapiens GN=SEC63 PE=1 SV=2
6876_1	sp|P60866|RS20_HUMAN	26.9157	0.000204499	13364.3	DTGKTPVEPEVAIHR;KTPCGEGSK;LIDLHSPSEIVK;RLIDLHSPSEIVK;TPVEPEVAIHR;VCADLIR	1;1;1;1;1;1	6	23	0.3697	494579;494576;494573;114653;332163;332166;332168;332161;332164;332155;332160;332165;332153;332162;420452;420449;420448;272599;272597;272591;272628;60498;60494	-	40S ribosomal protein S20 OS=Homo sapiens GN=RPS20 PE=1 SV=1
5821_1	sp|Q9HA77|SYCM_HUMAN	45.9628	0	62184.7	ASLKEPEGPR;AWLQPTGR;GLTAHGINIK;GNVYFDLK;GQLACGSVR;LVGVVPGPVGEPADSDKR;NYITIK;SSTTSTWELLDQR;TFSPDVFR;VLPPTVYLR;VVDAILGLAHHGNGQLR	1;1;1;1;1;1;1;1;1;1;1	11	28	0.2057	172108;172104;172112;172113;97123;143672;110423;110421;106289;564669;564671;564668;564677;21734;21708;429551;117114;159599;159607;159613;159602;159601;554969;554964;555360;554955;555387;554965	-	Probable cysteine--tRNA ligase, mitochondrial OS=Homo sapiens GN=CARS2 PE=1 SV=1
1068_3	sp|Q08209|PP2BA_HUMAN	22.8038	0.000204499	58650.3	AVPFPPSHR;GLTPTGMLPSGVLSGGK;HLTEYFTFK;IITEGASILR;LEESVALR;TQEHFTHNTVR;VFSVLR;YENNVMNIR	1;1;1;1;1;1;1;1	8	11	0.1516	136114;454587;462775;236674;166469;93175;343138;343147;9934;225631;215925	-	Serine/threonine-protein phosphatase 2B catalytic subunit alpha isoform OS=Homo sapiens GN=PPP3CA PE=1 SV=1
7600_1	sp|P31937|3HIDH_HUMAN	53.08	0	35305.8	DLGLAQDSATSTK;EFQDAGEQVVSSPADVAEK;GSLLIDSSTIDPAVSK;IITMLPTSINAIEAYSGANGILKK;ILNMSSGR;KDFSSVFQFLR;KGSLLIDSSTIDPAVSK;MGAVFMDAPVSGGVGAAR;SPILLGSLAHQIYR;TPVGFIGLGNMGNPMAK	1;1;1;1;1;1;1;1;1;1	10	74	0.4196	306189;306190;306178;644997;644989;644975;644980;644992;644994;645287;644977;645285;644990;645289;645280;644987;645286;471187;471188;769774;772834;81570;81567;81568;75824;75845;75830;75823;345404;537292;537301;537279;537299;537287;517752;525863;525867;533704;533714;525851;525857;525841;517759;517746;525861;517762;517747;525847;452458;452462;452457;452464;452461;452463;452455;452460;453070;523500;…	-	3-hydroxyisobutyrate dehydrogenase, mitochondrial OS=Homo sapiens GN=HIBADH PE=1 SV=2
8527_1	sp|P55157|MTP_HUMAN	207.116	0	99288.8	ATSVTTYK;DVNVENVNQQR;EFYSYQNEAVAIENIK;EFYSYQNEAVAIENIKR;EMVAHNYDR;ENLEALQRPTLLHLIHGK;ETVMIITGTLVR;FEMPASK;FKGSIGSSDIR;FLYACGFASHPNEELLR;GCPSLSELWR;GHTTGLSLNNDR;GKLQDSVGYR;GLASLFQTQLSSGTTNEVDISGNCK;GSIGSSDIR;ISSNVDVALLWR;IYHQNR;KEEILQILK;KLCQNEGCK;KLILGGLEK;KYLQPDNLSK;LQDSVGYR;LTYSTEVLLDR;MLSASGDPISVVK;MYLLALK;NALLPEGIPSLLK;NFLAFIQHLR;NILLSIGELPQEMNK;NPDGDDDQLIQITMK;QAAAIIK;SASTYSLDILYSGSGILR;SDSS…	1;1;1;1;1;1;1;1;1;1;1;1;1;1;1;1;1;1;1;1;1;1;1;1;1;1;1;1;1;1;1;1;1;1;1;1;1;1;1;1;1;1	42	149	0.5	71888;71886;310645;310649;310677;614754;615159;666231;666223;666764;666222;204535;668888;668889;668882;668887;668880;668884;668883;668885;669125;668878;669124;322260;322258;322251;331001;43544;50390;224791;650700;650692;650686;651054;247997;248014;248004;293025;293023;196307;788103;788272;788100;788101;80821;344977;344970;344974;344981;344975;52811;52808;190755;190762;190767;190759;190758;190766;…	-	Microsomal triglyceride transfer protein large subunit OS=Homo sapiens GN=MTTP PE=1 SV=1
2575_1	sp|Q92781|RDH1_HUMAN	6.29906	0.00334572	34956.6	LAANGGGYCVSK;VSIVEPGFFR	1;1	2	2	0.0692	243236;214783	-	11-cis retinol dehydrogenase OS=Homo sapiens GN=RDH5 PE=1 SV=1
1029_1	sp|P01903|DRA_HUMAN	25.9482	0.000204499	28588.7	ANLEIMTK;FASFEAQGALANIAVDK;KFHYLPFLPSTEDVYDCR;NGKPVTTGVSETVFLPR;SNYTPITNVPPEVTVLTNSPVELR;VEHWGLDEPLLK	1;1;1;1;1;1	6	35	0.378	94176;94169;546708;546729;546690;546688;546701;546710;546663;723435;568842;568844;569189;569190;569193;568839;568838;568845;569172;568832;569211;568843;569181;568837;568835;569187;569178;568833;569182;569183;789765;381034;381048;380976;381043	-	HLA class II histocompatibility antigen, DR alpha chain OS=Homo sapiens GN=HLA-DRA PE=1 SV=1
937_1	sp|Q5T6V5|CI064_HUMAN	63.8175	0	39003.8	AAGPELR;ALHELNPR;AQILVADTWSVLEGK;DISSITMFADYR;DVFIDSGGVRR;DVTLFEGK;GCSLWCVELIR;GIPFHR;LLKGEMLSYGDR;LMHLVVESFPSYR;LPQVLAHLGALK;RVAELLLAK;SDTDVSMPLVEER;VAELLLAK;YSDDLLKK	1;1;1;1;1;1;1;1;1;1;1;1;1;1;1	15	43	0.4223	6490;107456;107463;107462;484728;371430;380130;371437;257485;257488;89274;89292;89277;356207;12331;350235;457737;457730;457731;457722;457718;457738;466527;466509;457710;466526;466493;279012;279009;279011;279005;279007;279008;279006;138558;412956;404730;404737;65602;65601;65605;65598;123214	-	UPF0553 protein C9orf64 OS=Homo sapiens GN=C9orf64 PE=1 SV=1
3455_1	sp|Q9Y4P8|WIPI2_HUMAN	14.8096	0.000204499	49376.8	AANMIPAHDSPLAALAFDASGTK;LDGSLETTNEILDSASHDCPLVTQTYGAAAGK;VLHTIR	1;1;1	3	8	0.1344	718927;718935;722953;858126;858087;858130;17232;17231	-	WD repeat domain phosphoinositide-interacting protein 2 OS=Homo sapiens GN=WIPI2 PE=1 SV=1
854_1	sp|O95760|IL33_HUMAN	5.35572	0.0057133	30739.5	MLMVTLSPTK;TDPGVFIGVK	1;1	2	2	0.0741	194977;147886	-	Interleukin-33 OS=Homo sapiens GN=IL33 PE=1 SV=1
7537_1	sp|P50552|VASP_HUMAN	79.3983	0	39805.1	ATVMLYDDGNKR;DESANQEEPEAR;KMQPDQQVVINCAIVR;MQPDQQVVINCAIVR;QEEASGGPTAPK;QELLEEVKK;QQPGPSEHIER;QVWGLNFGSK;SSSSVTTSETQPCTPSSSDYSDLQR;TPKDESANQEEPEAR;VPAQSESVR;VQIYHNPTANSFR;VSKQEEASGGPTAPK;WLPAGTGPQAFSR;YNQATPNFHQWR	1;1;1;1;1;1;1;1;1;1;1;1;1;1;1	15	45	0.4211	350703;350694;359521;359525;350701;345669;607038;607043;613674;607783;555262;555268;555267;562604;555754;227598;191769;289301;205507;205460;798228;798344;798227;798489;521797;521794;118763;118754;118757;442104;442093;442101;442668;442107;442096;409040;409042;353496;449481;449468;449494;449495;449499;450001;449491	-	Vasodilator-stimulated phosphoprotein OS=Homo sapiens GN=VASP PE=1 SV=3
533_1	sp|P63218|GBG5_HUMAN	14.0371	0.000204499	7313.8	QFCLQNAQHDPLLTGVSSSTNPFRPQK;VKVSQAAADLK;VSQAAADLK	1;1;1	3	9	0.5588	837278;837375;837274;837442;837433;837441;201427;86185;86206	-	Guanine nucleotide-binding protein G(I)/G(S)/G(O) subunit gamma-5 OS=Homo sapiens GN=GNG5 PE=1 SV=3
5939_1	sp|Q96EE3|SEH1_HUMAN	69.9145	0	39623.4	AETLMTVTDPVHDIAFAPNLGR;AHSPMIAVGSDDSSPNAMAK;ANYMDNWK;DLIHDVSFDFHGR;ELTSSGGPTK;GQSHWVK;HMGLMLATCSADGIVR;IYEAPDVMNLSQWSLQHEISCK;LSCSCISWNPSSSR;SFHILAIATK;TAAVWEEIVGESNDKLR;VQIFEYNENTR;VQIFEYNENTRK;VTWAHPEFGQVLASCSFDR	1;1;1;1;1;1;1;1;1;1;1;1;1;1	14	25	0.5278	741811;742078;638389;638390;150600;447590;120850;57660;537491;537492;791009;790845;490176;490178;490625;183055;183052;614430;614834;368753;439254;702891;702916;702876;702889	-	Nucleoporin SEH1 OS=Homo sapiens GN=SEH1L PE=1 SV=3
172_1	sp|P01591|IGJ_HUMAN	9.28239	0.000204499	18087	CYTAVVPLVYGGETK;FVYHLSDLCK;IIVPLNNR	1;1;1	3	5	0.2075	498906;498922;498907;291576;102203	-	Immunoglobulin J chain OS=Homo sapiens GN=JCHAIN PE=1 SV=4
6280_1	sp|Q9UKT5|FBX4_HUMAN	21.8404	0.000204499	44108	DLPSWSSVDWK;MCCPYTR;SLPDLEILK;TFWQSVSK;VCEVVDGFIYVANAEAHKR;YSVIPQIQK	1;1;1;1;1;1	6	7	0.1628	313941;125488;145524;145525;123519;694752;167832	-	F-box only protein 4 OS=Homo sapiens GN=FBXO4 PE=1 SV=2
7129_1	sp|O95602|RPA1_HUMAN	7.94071	0.000581846	194687	GFTLGVEDILVKPK;TALSAVDMTQR	1;1	2	2	0.0145	425850;241018	-	DNA-directed RNA polymerase I subunit RPA1 OS=Homo sapiens GN=POLR1A PE=1 SV=2
5233_1	sp|Q9NSY2|STAR5_HUMAN	12.9809	0.000204499	23778.8	DFVDLVLVK;FYANLQK;GFNHPCGCFCEPLPGEPTK	1;1;1	3	6	0.1643	154046;154036;154050;78280;701870;701868	-	StAR-related lipid transfer protein 5 OS=Homo sapiens GN=STARD5 PE=1 SV=2
92_1	sp|Q01740|FMO1_HUMAN	25.9464	0.000204499	60271.7	EFVLNDELPGRIITGK;ENSVIFNNTSK;FTEHVEEGR;GQYFHSR;INNWLNHANYGLIPEDR;LPPPSVMIEEINAR;VLVIGMGNSGTDIAVEASHLAEK	1;1;1;0;1;1;1	6	6	0.1823	568458;275725;184498;81879;81880;81881;81874;655333;451435;729140	-	Dimethylaniline monooxygenase [N-oxide-forming] 1 OS=Homo sapiens GN=FMO1 PE=1 SV=3
1021_1	sp|P48506|GSH1_HUMAN	125.044	0	72719.3	ASGELMTVAR;CNQIANELCECPELLGSAFR;CSILNYLK;DAVLQGMFYFR;DKNTPSPFIETFTEDDEASR;DPLTLFEEK;EATSILEENQALCTITSFPR;EFIANHPDYK;FKPPPPNSDIGWR;FSTLTR;GGNAVVDGCGK;GLEPLKNNNYR;GLLSQGSPLSWEETKR;GYVSDIDCR;HKDVLK;IHLDDANESDHFENIQSTNWQTMR;KEATSILEENQALCTITSFPR;LDFLIPLSK;LGCPGFTLPEVKPNPVEGGASK;NTPSPFIETFTEDDEASR;SLFFPDEAINK;SLFFPDEAINKHPR;SRYDSIDSYLSK;VLETLQEK;VVINVPIFK;WGVISASVDDR;YDSIDSYLSK	1;1;1;1;1;1;1;1;1;1;1;1;1;1;1;1;1;1;1;1;1;1;1;1;1;1;1	27	96	0.4553	148421;148430;148429;148413;148424;148414;744666;744437;744662;744861;744664;744433;744663;744431;744446;744436;744660;137413;137405;137411;329694;726533;177524;177529;721640;721627;721637;721629;721632;721861;721631;721645;263406;263399;422560;422543;422546;422540;422576;422553;422561;422541;422554;422542;11456;148050;312894;312897;563162;562714;172391;17424;821979;822076;821976;821977;749834;15…	-	Glutamate--cysteine ligase catalytic subunit OS=Homo sapiens GN=GCLC PE=1 SV=2
4245_1	sp|P45880|VDAC2_HUMAN	48.5014	0	31546.5	GFGFGLVK;LTFDTTFSPNTGK;LTFDTTFSPNTGKK;LTLSALVDGK;NNFAVGYR;SCSGVEFSTSGSSNTDTGK;SINAGGHK;TGDFQLHTNVNDGTEFGGSIYQK;VTGTLETK;YQLDPTASISAK	1;1;1;1;1;1;1;1;1;1	10	31	0.3741	50221;50223;50222;50220;50225;377023;377516;447173;447175;140585;140582;140584;140588;140593;140598;102713;102716;611119;610563;33252;771373;771360;771370;771357;771590;771371;61542;298268;298283;298745;298266	-	Voltage-dependent anion-selective channel protein 2 OS=Homo sapiens GN=VDAC2 PE=1 SV=2
8039_1	sp|Q9BZF3|OSBL6_HUMAN	8.41358	0.00039093	106239	LLQNLEILQR;SAFNSIAIEK	1;1	2	3	0.0214	267568;267564;169838	-	Oxysterol-binding protein-related protein 6 OS=Homo sapiens GN=OSBPL6 PE=1 SV=1
7168_1	sp|Q9GZN7|ROGDI_HUMAN	10.6665	0.000204499	32233.7	FTLPGSGTEGPAK;LTTPATLTLPEIAASGLTR;NNQLLHFAFR	1;1;1	3	3	0.1463	279791;617903;278665	-	Protein rogdi homolog OS=Homo sapiens GN=ROGDI PE=1 SV=1
3412_1	sp|Q9Y2Q3|GSTK1_HUMAN	76.0483	0	25480.3	AGMSAEQAQGLLEK;DFLSVMLEK;DSGNKPPGLLPR;ETTEAACR;FLTAVNLEHPEMLEK;GLYMANDLK;GSLSAMR;HHLQIPIHFPK;KGLYMANDLK;MELLAHLLGEK;NEDITEPQSILAAAEK;NQLKETTEAACR;VWSRNEDITEPQSILAAAEK;WMGPIPPAVNAR;YGAFGLPITVAHVDGQTHMLFGSDR	1;1;1;1;1;1;1;1;1;1;1;1;1;1;1	15	167	0.6991	388493;379178;379158;388488;379159;379157;388478;388482;389015;379171;379202;379730;171029;171038;171036;171042;171026;171028;171037;171046;171025;171034;171031;171033;171040;181075;181078;171032;181081;181063;274416;274420;274412;274418;274408;274414;274425;274413;274415;274430;274422;274434;101466;101465;555300;555290;555284;562158;555288;555297;562174;555282;555304;555289;555279;562152;562612;…	-	Glutathione S-transferase kappa 1 OS=Homo sapiens GN=GSTK1 PE=1 SV=3
3493_1	sp|Q15654|TRIP6_HUMAN	36.5679	0	50255.5	AYCEGCYVATLEK;AYHPGCFTCVVCHR;CATCSQPILDR;GPAWVGSHGVLQHTQGLPADR;GQHFYAVER;GTPGPPPAHGAALQPHPR;QAYEPPPPPAYR;VFHVGCFVCSTCR	1;1;1;1;1;1;1;1	8	15	0.2332	450308;551986;551983;314607;696379;696376;186432;186430;549461;549479;549473;549505;352328;483980;483979	-	Thyroid receptor-interacting protein 6 OS=Homo sapiens GN=TRIP6 PE=1 SV=3
4706_1	sp|Q9ULH1|ASAP1_HUMAN	20.7691	0.000204499	125420	FGSNFLSR;IQSLELDKLGTSELLLAK;LNLLTCQVKPNAEDKK;SKPTVDIVNQAGETALDIAK;SKPTVDIVNQAGETALDIAKR	1;1;1;1;1	5	7	0.0558	96633;634142;597146;665204;665202;708281;708261	-	Arf-GAP with SH3 domain, ANK repeat and PH domain-containing protein 1 OS=Homo sapiens GN=ASAP1 PE=1 SV=4
5228_1	sp|Q9Y426|CU025_HUMAN	6.93954	0.00151143	75486.1	STIIISGISK;TVMPCGTVVTTVTAVK	1;1	2	2	0.0374	141575;502854	-	C2 domain-containing protein 2 OS=Homo sapiens GN=C2CD2 PE=1 SV=2
139_2	sp|Q8WX93|PALLD_HUMAN	76.367	0	150470	DAGIYTCIATNR;DAVIQDLER;DSGDENEPIQER;EAHKPPVFIEK;EDAGWYTVSAK;ENESLTHSTDR;ENGVHSLIIEPVTSR;FFRPHFLQAPGDLTVQEGK;IFEGMPVTFTCR;KENESLTHSTDR;LDVYTQWHQQSQSTKPK;LMVQAVNQR;LQNTGVADGYPVR;NEAGIVSCTAR;SPSGHPHVR;VLGVPPPQIFWK;VSGLPTPDLSWQLDGKPVRPDSAHK	1;1;1;1;1;1;1;1;1;1;1;1;1;1;1;1;1	17	34	0.1511	334223;159848;353820;299025;299029;259793;259823;295252;495665;495672;496456;495663;496372;697795;697792;697793;698067;393271;370330;666785;666753;160467;167149;159909;354576;354579;354578;354604;231458;119248;349774;797539;797541;797627	-	Palladin OS=Homo sapiens GN=PALLD PE=1 SV=3
1394_1	sp|P62273|RS29_HUMAN	11.5585	0.000204499	6672.3	DIGFIKLD;GHQQLYWSHPR;YGLNMCR	1;1;1	3	23	0.4643	94509;94517;365808;365811;365837;365827;365836;365824;365814;365813;365831;365820;365799;365797;365812;365786;365741;365791;366442;365776;366318;97439;91406	-	40S ribosomal protein S29 OS=Homo sapiens GN=RPS29 PE=1 SV=2
425_1	sp|P06280|AGAL_HUMAN	29.4982	0	48734.9	ALLQDKDVIAINQDPLGK;FDGCYCDSLENLADGYK;HISPQAK;LGFYEWTSR;SILDWTSFNQER;SYTIAVASLGK	1;1;1;1;1;1	6	6	0.1725	626817;651924;32530;219317;414092;188577	-	Alpha-galactosidase A OS=Homo sapiens GN=GLA PE=1 SV=1
5382_2	sp|Q9H2U1|DHX36_HUMAN	36.5574	0	114688	AESCGSGNSTGYQIR;AVICAGLYPK;ELVNLIDNHQVTVISGETGCGK;GFMQGHVNR;GQFAEHLLGAGFVSSR;ISAISVAER;LGGIAYFLSR;LPVEPHIGK;TDGLVAVHPK	1;1;1;1;1;1;1;1;1	9	14	0.1091	462453;177655;744946;744943;744942;161385;161387;152466;509400;105573;180750;180749;126805;149141	-	ATP-dependent RNA helicase DHX36 OS=Homo sapiens GN=DHX36 PE=1 SV=2
711_1	sp|Q8NEU8|DP13B_HUMAN	50.0882	0	74446.3	AGYLNLR;DLFGLASNEHDLSMAK;GDEEVISTLHYFSK;LIDPQTQVSR;LLLEEALQDSPQTR;LVGFVIR;QIYLTDNPEAVAIK;SGIILQAESR;VVDELNLLHTELAK;VYGAQNEMCLATQQLSK	1;1;1;1;1;1;1;1;1;1	10	17	0.1852	42699;544705;481768;481775;218185;218200;475870;475871;476307;41673;41666;456255;166761;166756;467198;466732;622840	-	DCC-interacting protein 13-beta OS=Homo sapiens GN=APPL2 PE=1 SV=3
8031_1	sp|Q53F19|NCBP3_HUMAN	8.34444	0.00039093	70549.3	GILSNSWK;YGNPNYGGMK	1;1	2	4	0.029	87164;182627;182628;192005	-	Nuclear cap-binding protein subunit 3 OS=Homo sapiens GN=NCBP3 PE=1 SV=2
7383_1	sp|Q9HCE5|MET14_HUMAN	6.21963	0.00351617	52118	GTQSLNPHNDYCQHFVDTGHRPQNFIR;QLLAQQLGAESADSIGAVLNSK	1;1	2	3	0.1075	851252;704879;704874	-	N6-adenosine-methyltransferase subunit METTL14 OS=Homo sapiens GN=METTL14 PE=1 SV=2
7120_1	sp|Q86Y07|VRK2_HUMAN	32.8988	0	58103.8	FMVMER;ILNPHGIPLGPLDFSTK;LGIDLQK;LPIPFPEGK;LPWEQNLKDPVAVQTAK;NPDQVYLADYGLSYR;SDVEILGYCMLR;STVLQLGIR;TNLLDELPQSVLK	1;1;1;1;1;1;1;1;1	9	9	0.2067	44768;575972;34675;131353;621826;556820;392318;125448;400972	-	Serine/threonine-protein kinase VRK2 OS=Homo sapiens GN=VRK2 PE=1 SV=3
6672_1	sp|Q9BUQ8|DDX23_HUMAN	82.1403	0	95523.9	AQPLSLEELLAK;DSSLPPHILEVIDK;EDSAVFYELK;ELAQQIEEETIK;GFIAGIDLK;HQVQLLGR;IDRIEESDQGPYAIILAPTR;IEESDQGPYAIILAPTR;IFREDYSITTK;IPNPIR;KGCDVLAK;LIDVLENR;MGCEIVIATPGR;MIDMGFEPDVQK;MLANFESGK;NIEDYIHR;QTVMFTATMPPAVER;SGVAITFLTK;TLEEKEQEEAR;TVAVIGGISR	1;1;1;1;1;1;1;1;1;1;1;1;1;1;1;1;1;1;1;1	20	25	0.25	309357;450202;245519;378172;378106;100051;107954;716082;716331;716338;597126;344832;5169;80579;118405;304397;366196;130664;160268;511276;149177;338563;338600;119060;119064	-	Probable ATP-dependent RNA helicase DDX23 OS=Homo sapiens GN=DDX23 PE=1 SV=3
5720_1	sp|Q7Z6J4|FGD2_HUMAN	48.3217	0	74844.8	AHTSIPLLGYQVTVGPQGDPR;ALDMIFSAAQHSNAAITEMER;ELMDAEFPHSFLVSGK;IVQELLETEQAYVAR;LGLEDDIVDPSNTLLR;LPAQAPDQADAQK;LQDLWEVYQR;NDPMERYLFLFNNMLLYCVPR;RLDDWTANPR;SPLFQEVLTR;VFQLQQSGQLYTFK	1;1;1;1;1;1;1;1;1;1;1	11	15	0.255	702716;727749;570958;551439;551440;551843;554919;333132;331286;331318;799888;269836;269830;239299;514973	-	FYVE, RhoGEF and PH domain-containing protein 2 OS=Homo sapiens GN=FGD2 PE=1 SV=1
4670_1	sp|Q8TEB9|RHBL4_HUMAN	6.11616	0.00351617	35800	IMEACAGGFSSSVGYPGR	1	1	1	0.0571	586371	-	Rhomboid-related protein 4 OS=Homo sapiens GN=RHBDD1 PE=1 SV=1
5414_1	sp|P16444|DPEP1_HUMAN	6.11616	0.00351617	45645	VASLIGVEGGHSIDSSLGVLR	1	1	1	0.0511	664237	-	Dipeptidase 1 OS=Homo sapiens GN=DPEP1 PE=1 SV=3
5522_1	sp|Q7Z2T5|TRM1L_HUMAN	14.0171	0.000204499	81695.2	NLGIVSVTSTDISSLYAK;SNEMITNLGK;TDVSTEHPPFYYNIHR	1;1;1	3	3	0.06	595395;186470;635356	-	TRMT1-like protein OS=Homo sapiens GN=TRMT1L PE=1 SV=2
3705_1	sp|P10253|LYAG_HUMAN	116.997	0	105257	AGYIIPLQGPGLTTTESR;AHFPLDVQWNDLDYMDSR;DFPAMVQELHQGGR;DFPAMVQELHQGGRR;DFTFNKDGFR;DGFRDFPAMVQELHQGGR;GAYTQVIFLAR;GELFWDDGESLEVLER;LDVMMETENR;LHFTIKDPANR;NHNSLLSLPQEPYSFSEPAQQAMR;QQPMALAVALTK;RYEVPLETPHVHSR;STFAGHGR;TTPTFFPK;VTSEGAGLQLQK;VTVLGVATAPQQVLSNGVPVSNFTYSPDTK;WGYSSTAITR;WTQLGAFYPFMR;YEVPLETPHVHSR;YMMIVDPAISSSGPAGSYRPYDEGLR;YMMIVDPAISSSGPAGSYRPYDEGLRR	1;1;1;1;1;1;1;1;1;1;1;1;1;1;1;1;1;1;1;1;1;1	22	140	0.2794	597753;597755;597759;706913;706911;706910;706914;711156;711158;706903;706909;706912;706915;707379;706902;707162;711165;711152;711685;706899;706908;706906;711686;461107;461113;461127;461128;461104;461102;461111;461101;461124;461091;470132;461117;461094;461109;461114;461126;461125;470115;461106;461105;461095;461112;461116;461115;470116;470108;470508;461099;470523;461119;470114;470461;461529;470487;…	-	Lysosomal alpha-glucosidase OS=Homo sapiens GN=GAA PE=1 SV=4
6043_1	sp|O15235|RT12_HUMAN	5.07477	0.00789293	15163	EAVCFIPGEGHTLQEHQIVLVEGGR	1	1	3	0.1812	807309;807396;807543	-	28S ribosomal protein S12, mitochondrial OS=Homo sapiens GN=MRPS12 PE=1 SV=1
8294_1	sp|Q9GZT8|NIF3L_HUMAN	16.8337	0.000204499	41941.5	ALMQVVDFLSR;GFLSDLR;TEILSLEKPLLLHTGMGR;VGIYSPHTAYDAAPQGVNNWLAK	1;1;1;1	4	5	0.1565	290132;42968;645810;645805;760920	-	NIF3-like protein 1 OS=Homo sapiens GN=NIF3L1 PE=1 SV=2
5221_1	sp|O75052|CAPON_HUMAN	9.05303	0.00039093	56114.8	DMLQHISLLVK;DQLAAEAAAR	1;1	2	4	0.0415	300303;309794;300304;139714	-	Carboxyl-terminal PDZ ligand of neuronal nitric oxide synthase protein OS=Homo sapiens GN=NOS1AP PE=1 SV=3
4151_1	sp|Q8N386|LRC25_HUMAN	16.2657	0.000204499	33157.4	ASNVILLDLSGNGLR;ELNKPWAAQDGPKPGLGLQPR;ELPVTFFAHLQK	1;1;1	3	5	0.1574	439868;719851;720457;377777;377762	-	Leucine-rich repeat-containing protein 25 OS=Homo sapiens GN=LRRC25 PE=1 SV=2
4207_1	sp|Q8NHP8|PLBL2_HUMAN	18.1972	0.000204499	65430	AFIPGGPSPGSR;LASDGATWADIFKR;LTLLQLK;VSFPAGK;YWLQFR	1;1;1;1;1	5	5	0.0781	209310;444284;51868;3431;90989	-	Putative phospholipase B-like 2 OS=Homo sapiens GN=PLBD2 PE=1 SV=2
1870_1	sp|O60783|RT14_HUMAN	12.2323	0.000204499	15129	HLADHGQLSGIQR;ILQDVADEEIAALPR	1;1	2	5	0.2188	378791;379312;378802;497086;497075	-	28S ribosomal protein S14, mitochondrial OS=Homo sapiens GN=MRPS14 PE=1 SV=1
6362_1	sp|Q96B26|EXOS8_HUMAN	13.6408	0.000204499	30020.3	GYVVPNVDLPPLCSSR;LGNTTVICGVK;TTTVNIGSISTADGSALVK	1;1;1	3	3	0.1667	556090;221526;582485	-	Exosome complex component RRP43 OS=Homo sapiens GN=EXOSC8 PE=1 SV=1
2447_1	sp|P27487|DPP4_HUMAN	61.9832	0	88222.5	AGAVNPTVK;CSGPGLPLYTLHSSVNDK;FRPSEPHFTLDGNSFYK;IEPNLPSYR;IMHAINR;IQLSDYTK;ISLQWLR;KTYTLTDYLK;LAYVWNNDIYVK;LGTFEVEDQIEAAR;MLQNVQMPSK;TYTLTDYLK;VTCLSCELNPER;YMGLPTPEDNLDHYR;YPLLLDVYAGPCSQK	1;1;1;1;1;1;1;1;1;1;1;1;1;1;1	15	16	0.2128	65370;624344;656314;175695;64445;116805;92893;271309;415242;457620;457652;230357;192751;404718;576698;533364	-	Dipeptidyl peptidase 4 OS=Homo sapiens GN=DPP4 PE=1 SV=2
5761_1	sp|Q8IWW8|HOT_HUMAN	75.175	0	50275.7	AANLYASSPHSDFLDYVSAPIGK;ADIPALVK;AIKPTLGLIDPLHTLHMPAR;EVGMDLK;GAFDAYVAVGGGSTMDTCK;HLEMAEILGADTR;IQDAGLVLADTLR;IQDAGLVLADTLRK;LPPVQVAMDSLVK;NGIPFTVYDNVR;NPDDLEAR;NVCLMTDK;TTDYAFEMAVSNIR;VEPTDSSFMEAIEFAQK;YGAAVTK	1;1;1;1;1;1;1;1;1;1;1;1;1;1;1	15	49	0.3919	752620;752460;752463;50975;50963;50956;50957;50967;50962;50955;699490;699492;699491;36657;610059;392411;401221;392396;392402;392404;401210;352077;352080;352091;423740;423742;423713;358838;358832;358835;358842;358836;368524;368519;358833;358844;368504;357496;357476;358018;358025;357497;97477;122566;478087;486482;478644;624726;5065	-	Hydroxyacid-oxoacid transhydrogenase, mitochondrial OS=Homo sapiens GN=ADHFE1 PE=1 SV=1
4435_1	sp|O94888|UBXN7_HUMAN	10.0689	0.000204499	54828.2	FELLTNFPR;GLIQQFTTITGASESVGK	1;1	2	4	0.0552	206113;206132;206733;583324	-	UBX domain-containing protein 7 OS=Homo sapiens GN=UBXN7 PE=1 SV=2
1833_1	sp|O60701|UGDH_HUMAN	153.274	0	54989.2	ASVGFGGSCFQK;AVQALCAVYEHWVPR;DPYEACDGAHAVVICTEWDMFK;EADLVFISVNTPTK;EQIVVDLSHPGVSEDDQVSR;ESSSIYISK;FSLQDPPNK;FSLQDPPNKKPK;IAILGFAFK;ICCIGAGYVGGPTCSVIAHMCPEIR;IFDANTKPNLNLQVLSNPEFLAEGTAIK;IIDSLFNTVTDK;IIDSLFNTVTDKK;ILTTNTWSSELSK;INAWNSPTLPIYEPGLK;INAWNSPTLPIYEPGLKEVVESCR;IPYAPSGEIPK;IVQNSNGYK;KICCIGAGYVGGPTCSVIAHMCPEIR;LAANAFLAQR;MLKPAFIFDGR;NLFFSTNIDDAIK;RIPYAPSGEIPK;RIVQNSNGYK;VLIGGDETPEGQR;VTVVD…	1;1;1;1;1;1;1;1;1;1;1;1;1;1;1;1;1;1;1;1;1;1;1;1;1;1;1;1	28	321	0.6559	270395;270397;270390;270391;270389;270398;270384;567561;567576;567564;567562;567550;567580;567579;567545;567991;788518;786285;435489;435492;435485;435428;435473;435484;435479;435495;435448;435504;435518;436003;436022;436030;435529;703448;703431;703436;703459;703441;703457;703439;703442;703750;703726;703447;703437;703748;703423;703446;703433;703443;703697;703449;703456;703450;703445;703425;703429;…	-	UDP-glucose 6-dehydrogenase OS=Homo sapiens GN=UGDH PE=1 SV=1
2459_2	sp|Q07666|KHDR1_HUMAN	23.6431	0.000204499	48197.2	AKEEELR;DDEENYLDLFSHK;DSLDPSFTHAMQLLTAEIEK;FNFVGK;GVPPPPTVR;ILGPQGNTIK;KDDEENYLDLFSHK;YLPELMAEK	1;1;1;1;1;1;1;1	8	20	0.1693	74129;481656;717240;5761;5770;5768;5766;94279;150483;150476;150487;150492;150491;546995;546988;547007;546997;178574;178572;178569	-	KH domain-containing, RNA-binding, signal transduction-associated protein 1 OS=Homo sapiens GN=KHDRBS1 PE=1 SV=1
6846_1	sp|Q9Y2V7|COG6_HUMAN	27.5454	0	73232.6	AQVADAFLSK;EQTQDLIVK;EVLASHDSSVVPLDAR;FQLTSDEMSLLR;LDNDKEMLEALK;VKQIHNDVK;VRIEQVIVAEPGAVLLYK	1;1;1;1;1;1;1	7	9	0.1309	154883;155490;154873;166746;518823;383766;371626;170697;642288	-	Conserved oligomeric Golgi complex subunit 6 OS=Homo sapiens GN=COG6 PE=1 SV=2
5833_1	sp|Q13123|RED_HUMAN	21.1365	0.000204499	65561.8	AVGPTAEADKSAAEK;FAGSAGWEGTESLK;FLGGDMEHTHLVK;GLDFALLQK;LTQILSYLR;NELFLPGR	1;1;1;1;1;1	6	7	0.1221	385904;383059;407981;134961;186857;186870;105469	-	Protein Red OS=Homo sapiens GN=IK PE=1 SV=3
5036_1	sp|O00764|PDXK_HUMAN	18.746	0.000204499	35079.9	AQAGEGVRPSPMQLELR;KIHSQEEALR;TVSTLHHVLQR;VLSIQSHVIR	1;1;1;1	4	7	0.1538	584386;251980;296874;296871;296868;296875;215705	-	Pyridoxal kinase OS=Homo sapiens GN=PDXK PE=1 SV=1
8290_1	sp|Q96JJ7|TMX3_HUMAN	12.2494	0.000204499	51838.9	MDATSYSSIASEFGVR;STIVSIFK;TKDDIIEFAHR	1;1;1	3	3	0.0771	531956;82380;328618	-	Protein disulfide-isomerase TMX3 OS=Homo sapiens GN=TMX3 PE=1 SV=2
7474_1	sp|Q8IZJ1|UNC5B_HUMAN	5.07477	0.00789293	103572	HSLASTELTCK	1	1	1	0.0116	271700	-	Netrin receptor UNC5B OS=Homo sapiens GN=UNC5B PE=1 SV=2
1442_1	sp|O43264|ZW10_HUMAN	27.4089	0	88772.9	DLHVSTGEFTDLK;FLKGDTTDLLK;LVLEVLQK;NLMTSEIHNTVK;QLQEFSTAIEEYNCALTEK;VSNTQYHEVMNLEPENTLDQHSFSLPTCR;YVTGAQR	1;1;1;1;1;1;1	7	9	0.1271	395763;274465;103436;352887;361778;352892;720748;864268;37581	-	Centromere/kinetochore protein zw10 homolog OS=Homo sapiens GN=ZW10 PE=1 SV=3
7008_1	sp|Q9BSD7|NTPCR_HUMAN	22.6271	0.000204499	20700.1	HVFLTGPPGVGK;IGFDVVTLSGTR;NHLLPDIVTCVQSSR;QTLSTPGTIILGTIPVPK;VGLEPPPGKR	1;1;1;1;1	5	11	0.3526	250920;250918;281506;540805;582975;582974;582970;582973;583370;155088;155087	-	Cancer-related nucleoside-triphosphatase OS=Homo sapiens GN=NTPCR PE=1 SV=1
1706_1	sp|Q8IYB5|SMAP1_HUMAN	11.1909	0.000204499	50354.3	LNEQHQLILSK;NLGVHISR;RPQTDQAVEFFIR	1;0;1	2	3	0.0685	316473;82884;472846;472847	-	Stromal membrane-associated protein 1 OS=Homo sapiens GN=SMAP1 PE=1 SV=2
4116_1	sp|Q7L014|DDX46_HUMAN	99.7133	0	117290	ASYPCMSLHGGIDQYDR;DLIGIAK;DSIINDFK;GGTILAPTVSAK;GYAYTFITEDQAR;IEYEPFRK;ILSKPIEVQVGGR;ISEYSEAAITIR;IVDNVRPDR;LLVATSVAAR;LNYVPLEK;LQNSYQPTNK;MIDMLAANSGR;MSQEEVNVFR;NFYVEVPELAK;SLEEGEGPIAVIMTPTR;SVVCSDVEQQVIVIEEEKK;TIAEQLAEK;VKDMAAPGTSSVPAPTAGNAEK;VTYVVLDEADR;VVCVYGGTGISEQIAELKR;VVTVVTTK;YAGDIIK	1;1;1;1;1;1;1;1;1;1;1;1;1;1;1;1;1;1;1;1;1;1;1	23	30	0.2629	633523;13873;108096;191265;435743;171059;358314;358313;358315;358323;333229;333235;172159;132861;120314;241010;232304;266517;307506;307496;307530;568021;568007;706067;133689;673598;290618;667989;60708;32267	-	Probable ATP-dependent RNA helicase DDX46 OS=Homo sapiens GN=DDX46 PE=1 SV=2
1706_2	sp|Q8WU79|SMAP2_HUMAN	25.0158	0.000204499	46754.8	DLDLLASVPSPSSSGSR;KLEPVVFEK;LYEAYLPETFR;NLGVHISR;RPQIDPAVEGFIR;SLDINAFR;SLDINAFRK	1;1;1;0;1;1;1	6	11	0.1562	515378;515388;515368;515377;175855;361166;82884;415358;415365;100828;162656;162652	-	Stromal membrane-associated protein 2 OS=Homo sapiens GN=SMAP2 PE=1 SV=1
1168_1	sp|Q9Y5R8|TPPC1_HUMAN	16.6585	0.000204499	16820.6	LHYYETPTGIK;NPLCPLGQTVQSELFR;SLPFFSAR;TVHNLYLFDR	1;1;1;1	4	9	0.3103	315450;591550;591900;591510;95787;95783;95779;289440;289462	-	Trafficking protein particle complex subunit 1 OS=Homo sapiens GN=TRAPPC1 PE=1 SV=1
3701_1	sp|O75976|CBPD_HUMAN	43.097	0	152835	AIIENLIQK;ALIEWIR;DLSAENGLESLMLR;DLSEFLR;ENSQMFQGRPCK;IGQTNAR;IVIVPSLNPDGR;SPDDAVFQQIALSYSK;SQEGDSISVIGR;SSSNLALALYR;YIGNMHGNEVVGR	1;1;1;1;1;1;1;1;1;1;1	11	13	0.087	150918;84950;84952;442625;76702;407036;24904;290924;554410;555087;272400;242451;386534	-	Carboxypeptidase D OS=Homo sapiens GN=CPD PE=1 SV=2
4475_1	sp|Q99538|LGMN_HUMAN	26.0011	0.000204499	49379.4	DYTGEDVTPQNFLAVLR;ESSYACYYDEK;ESSYACYYDEKR;HQADACHAYQIIHR;VMQFQGMK	1;1;1;1;1	5	21	0.1178	622014;622045;622013;369167;453740;453741;453739;531519;531522;531518;531508;531510;531514;124380;124382;124378;124381;124379;124377;132398;124386	-	Legumain OS=Homo sapiens GN=LGMN PE=1 SV=1
3814_1	sp|Q9NZ32|ARP10_HUMAN	51.9145	0	46277.3	CIIPSVIK;EFIHILYFR;ELETQLLEQCTVDTSVAK;HLLVNPR;IHTPPAK;ILHILGSIR;PLYEGLGSGGEK;TAVVIDLGEAFTK;TCFVSDLKR;VVIIESVLCPSHFR;YLVEKPK	1;1;1;1;1;1;1;1;1;1;1	11	22	0.271	97938;266286;266278;663501;663502;663503;61629;61634;26826;26829;26830;142852;142851;249258;339978;339982;198125;198158;498638;498647;498637;75476	-	Actin-related protein 10 OS=Homo sapiens GN=ACTR10 PE=1 SV=1
6770_1	sp|L0R6Q1|S35U4_HUMAN	31.0435	0	11125.9	DLAFLK;DYLQLLR;GFLAGYVVAK;LKDLAFLK;NQLESLQR;RVEDEVNSGVGQDGSLLSSPFLK;TLRDYLQLLR;VEDEVNSGVGQDGSLLSSPFLK	1;1;1;1;1;1;1;1	8	18	0.5728	3828;3846;94535;94536;94534;144044;144049;144051;144057;106591;125717;125714;754069;754068;754070;296903;296899;721436	-	SLC35A4 upstream open reading frame protein OS=Homo sapiens GN=SLC35A4 PE=3 SV=1
3246_2	sp|P20700|LMNB1_HUMAN	135.932	0	66367.6	AEHDQLLLNYAK;AGGPTTPLSPTR;ALDDTAR;ALYETELADARR;CKAEHDQLLLNYAK;CQSLTEDLEFR;DAALATALGDKK;DQMQQQLNDYEQLLDVK;ESDLNGAQIK;EYEAALNSK;IESLSSQLSNLQK;IGDTSVSYK;IQELEDLLAK;KESDLNGAQIK;KIGDTSVSYK;LAQALHEMR;LAVYIDK;LQEKEELR;LREYEAALNSK;LSPSPSSR;LSSEMNTSTVNSAR;LYKEELEQTYHAK;MRIESLSSQLSNLQK;NSQGEEVAQR;NTSEQDQPMGGWEMIR;SLETENSALQLQVTER;SLETENSALQLQVTEREEVR;SMYEEEINETRR	1;1;1;1;1;1;1;1;1;1;1;1;1;1;1;1;1;0;1;0;1;1;1;1;1;1;1;1	26	56	0.442	369386;369391;369396;217159;25858;365374;365367;523039;523499;523035;358958;229474;229483;229465;229473;676005;676012;680456;167054;143853;387504;117462;117460;228259;246827;181165;181179;181162;181174;164769;164773;164767;49145;49132;49129;152203;298325;298331;298321;298335;52828;52827;423415;414579;415010;414574;414604;496227;496219;496209;545893;545904;192644;192645;599961;575616;733608;733613…	-	Lamin-B1 OS=Homo sapiens GN=LMNB1 PE=1 SV=2
3246_1	sp|Q03252|LMNB2_HUMAN	105.434	0	69905.7	AAATMATPLPGR;AGGPATPLSPTR;ALELENDR;ALYESELADAR;ATSSSSGSLSATGR;DLESLFHR;DVMQQQLAEYQELLDVK;GLESDVAELR;GQSSWGTGESFR;LAHYIDR;LALDMEINAYR;LALDMEINAYRK;LELEQTYQAK;LESLSYQLSGLQK;LQEKEELR;LQIEIGK;LRAELDEVNK;LSPSPSSR;LYKLELEQTYQAK;MAQALEELR;QVLEGEEIAYK;SEVELAAALSDKR;SQHDEQVR;SVFEEEVR;TVLVNADGEEVAMR;VKDLESLFHR	1;1;1;1;1;1;1;1;1;1;1;1;1;1;0;1;1;0;1;1;1;1;1;1;1;1	24	41	0.3984	218134;197645;112615;266030;283742;140340;140350;659096;175625;175631;301086;301702;301092;79598;307457;317729;381584;258316;398252;398258;152203;40266;40278;40294;40271;237351;52828;52827;483027;483030;161008;161038;289959;354117;354108;354111;131554;129283;418636;270039;270089;270051;270067;270061	-	Lamin-B2 OS=Homo sapiens GN=LMNB2 PE=1 SV=4
1393_2	sp|Q15029|U5S1_HUMAN	146.35	0	109366	CFAETPNKK;DSIVQGFQWGTR;EGPLCDELIR;FFDDPMLLELAK;FNTTSVIK;GGGQIIPTAR;GHVTQDAPIPGSPLYTIK;GNEEAQIFRPLK;IAVEPVNPSELPK;ILAQVVGDVDTSLPR;ILDAVVAQEPLHR;IYADTFGDINYQEFAK;KMYSEIDIK;LAVTVCINK;LGEFFQTK;LPPTDAYYK;LWGDIYFNPK;LWISVAR;MYSTDDGVQFHAFGR;NVTLCGHLHHGK;RYDQDLCYTDILFTEQER;SIVIRPLEPQPAPHLAR;STPVTVVLPDTK;TCFVDCLIEQTHPEIR;TLDELGIHLTK;TLDELGIHLTKEELK;VLSGTIHAGQPVK;VPAGNWVLIEGVDQPIVK;VVYSAFLMATPR;YDWDLLAAR;Y…	1;1;1;1;1;0;1;1;1;1;1;1;1;1;1;1;1;1;1;1;1;1;1;1;1;1;1;1;1;1;1	30	62	0.3745	179025;179002;356823;356826;246001;382660;89771;89780;117600;117588;117611;117603;117945;117567;117589;117604;117605;117579;605455;605459;605462;361343;356501;356502;356504;460336;460343;395508;395512;395511;605608;605987;605968;199021;140925;117500;117489;164387;275307;59436;536902;536901;536905;536896;537392;344771;741255;741084;741094;605509;605507;605508;605506;605510;277467;277462;648947;648…	-	116 kDa U5 small nuclear ribonucleoprotein component OS=Homo sapiens GN=EFTUD2 PE=1 SV=1
305_1	sp|P00441|SODC_HUMAN	27.25	0.000204499	15925.9	ADDLGKGGNEESTK;DGVADVSIEDSVISLSGDHCIIGR;GDGPVQGIINFEQK;GLTEGLHGFHVHEFGDNTAGCTSAGPHFNPLSR;HVGDLGNVTADK	1;1;1;1;1	5	13	0.6299	372629;372627;768654;768655;417427;417455;417430;417429;867509;867563;867607;259467;259464	-	Superoxide dismutase [Cu-Zn] OS=Homo sapiens GN=SOD1 PE=1 SV=2
3103_1	sp|Q96TA2|YMEL1_HUMAN	44.4361	0	86400.9	FDMQVTVPRPDVK;GILLVGPPGTGK;GPTLGHVSLLPENDR;IESPMHPYSR;IKFDQSVDPEIIAR;LAETQNIAPSFVK;LGVMTYSDTGK;LSPETQSAIEQEIR;NLAEALLTYETLDAK;VAEELIFGTDHITTGASSDFDNATK	1;1;1;1;1;1;1;1;1;1	10	18	0.1837	434226;188104;471961;255239;485368;485350;485358;485353;485360;371140;227655;227644;237707;470305;470293;503322;503323;789710	-	ATP-dependent zinc metalloprotease YME1L1 OS=Homo sapiens GN=YME1L1 PE=1 SV=2
2525_1	sp|Q9C0B1|FTO_HUMAN	29.2503	0	58244.9	DPDIWHVGFK;HGCLFR;ILIGNPGCTYK;KMEGVTNAVLHEVK;LFTVPWPVK;SFEPAVLK;VAECSTGTLDYILQR;VGMGSSYNGQDEVDIK	1;1;1;1;1;1;1;1	8	9	0.1762	253495;35680;264856;446048;174268;174267;80648;534180;520627	-	Alpha-ketoglutarate-dependent dioxygenase FTO OS=Homo sapiens GN=FTO PE=1 SV=3
7910_1	sp|Q8TCF1|ZFAN1_HUMAN	6.96649	0.00151143	30767.2	ELVAVICPYCEK;IYFQVFLPK	1;1	2	2	0.0784	406653;217260	-	AN1-type zinc finger protein 1 OS=Homo sapiens GN=ZFAND1 PE=1 SV=1
2826_1	sp|P32929|CGL_HUMAN	66.7084	0	44479.5	AGDQIICMDDVYGGTNR;AVVPPISLSTTFK;DVLGISDTLIR;FLQNSLGAVPSPIDCYLCNR;GTLQHAEIFLK;ISFVDCSK;LLEAAITPETK;LVWIETPTNPTQK;NDRDVLGISDTLIR;NGMAVAQFLESNPWVEK;QVASEFGLK;VIDIEGCAHIVHK;VIYPGLPSHPQHELVK;YMNGHSDVVMGLVSVNCESLHNR	1;1;1;1;1;1;1;1;1;1;1;1;1;1	14	41	0.4568	601846;602512;337596;337597;337591;337600;337595;246339;731823;732064;732071;732327;277423;277434;277417;110367;110365;236885;431138;431137;431135;431132;431133;462264;462261;462266;462256;462259;462258;616061;121743;411599;411598;411590;573960;573952;573953;573958;573957;574252;787007	-	Cystathionine gamma-lyase OS=Homo sapiens GN=CTH PE=1 SV=3
6493_1	sp|Q8WVM8|SCFD1_HUMAN	98.2775	0	72334	ALTDAGCNLNPLQYIK;AQEDEVKR;FGQDIISPLLSVK;GSPFPEVAESVQQELESYR;GTAAEMVAVK;HILYGCSELFNATQFIK;ILDNLMEMK;LEDIANAALAASAVTQVAK;LTSAVSSLPELLEK;MLNFNVPHIK;QLSQLGQK;QQNLPVTR;QTVALKR;SIMGLEGEDEGAISMLSDNTAK;SKLEDIANAALAASAVTQVAK;SLLDIISDPDAGTPEDK;SNPETDDYR;SYDLTPVDKFWQK;VMNTGSQFVMEGVK;VNLEESSGVENSPAGARPK	1;1;1;1;1;1;1;1;1;1;1;1;1;1;1;1;1;1;1;1	20	59	0.3956	564183;564188;564196;564162;119677;370586;370588;370592;370585;370593;687652;120870;656410;656035;186576;590487;590486;590475;590844;409662;409661;409663;409665;409660;253131;253124;253126;253127;253129;260937;85552;110594;110599;110600;46201;46198;46200;46202;718613;718841;665462;665463;665460;665461;665459;665457;561386;561384;561382;180441;482929;430969;440061;440077;622893;623234;623256;62289…	-	Sec1 family domain-containing protein 1 OS=Homo sapiens GN=SCFD1 PE=1 SV=4
6778_1	sp|O96008|TOM40_HUMAN	34.5779	0	37869.1	ANLLFK;ELFPIQMEGVK;FVNWQVDGEYR;GSVDSNWIVGATLEK;MAIQTQQSK;RPGEEGTVMSLAGK;TPGAATASASGAAEDGACGCLPNPGTFEECHR	1;1;1;1;1;1;1	7	16	0.2715	3482;306246;296566;296572;368078;368081;368708;456637;456635;456628;148427;148415;378712;378716;378713;849866	-	Mitochondrial import receptor subunit TOM40 homolog OS=Homo sapiens GN=TOMM40 PE=1 SV=1
8355_1	sp|Q9UPR0|PLCL2_HUMAN	12.6188	0.000204499	125785	DSVPGVSPQLLHIK;QIHFAAVSCGLNKPGTENADVQKPR;YANENPGDFVNYNKR	1;1;1	3	3	0.0479	411267;802322;568204	-	Inactive phospholipase C-like protein 2 OS=Homo sapiens GN=PLCL2 PE=1 SV=2
3717_1	sp|Q8WTS1|ABHD5_HUMAN	12.2313	0.000204499	39070.7	ALGAALTPFNPLAGLR;NMTIPYGWAK;TIAILGAGHYVYADQPEEFNQK	1;1;1	3	3	0.1375	459874;233532;759576	-	1-acylglycerol-3-phosphate O-acyltransferase ABHD5 OS=Homo sapiens GN=ABHD5 PE=1 SV=1
7001_2	sp|O00291|HIP1_HUMAN	54.4671	0	116148	ADKDSPNLAQLQQASR;AIGEELLPR;DSPNLAQLQQASR;EKYSELVQNHADLLR;FCHVFHK;GHVSELEADLAEQQHLR;GVNQATAGVVASTISGK;LASTEESMCQLAK;LIQIPQLPENPPNFLR;QVSMARQAQVDLER;SSNLQYFK;TQEQLEVLESLKQELATSQR;VVLQLK;YSELVQNHADLLR	1;1;1;1;1;1;1;1;1;1;1;1;0;1	13	18	0.1524	542137;542138;131335;376685;376646;377077;574200;119633;619956;448786;448788;448784;399013;603497;485241;125215;733443;408;447713	-	Huntingtin-interacting protein 1 OS=Homo sapiens GN=HIP1 PE=1 SV=5
7001_1	sp|Q9NX08|COMD8_HUMAN	18.4669	0.000204499	21077	EELQNLIQSLEAANK;EIVAISSAQLQDFDWQVK;LPAELGPQLLHK;MPLLSLHLDVK;VVLQLK	1;1;1;1;0	4	13	0.3388	521397;667468;667458;667465;667467;311834;311829;311840;311830;311832;311824;282294;282292;408	-	COMM domain-containing protein 8 OS=Homo sapiens GN=COMMD8 PE=1 SV=1
5058_1	sp|Q8WVC6|DCAKD_HUMAN	25.5252	0.000204499	26533.3	HVLDNSGEWSVTK;HVVQPGYPAHR;INAQLPLTDK;IVEVFGTEVLLENGDINRK;QLLNAITHPEIR;VLGDLIFNQPDRR	1;1;1;1;1;1	6	9	0.3377	401189;279372;190112;686196;686427;363498;364324;363491;440332	-	Dephospho-CoA kinase domain-containing protein OS=Homo sapiens GN=DCAKD PE=1 SV=1
3986_1	sp|P50583|AP4A_HUMAN	34.1736	0	16818.6	AALQEGHQFLCSIEA;ACGLIIFR;ELNYVAR;ETQEEAGIEAGQLTIIEGFK;ETQEEAGIEAGQLTIIEGFKR;GHVEPGEDDLETALR;LSHEHQAYR;TVIYWLAEVK	1;1;1;1;1;1;1;1	8	21	0.5782	508144;508138;107479;107474;107477;107482;107483;107478;107475;69056;69210;690856;730834;488701;488704;488705;488754;488739;208171;257971;257970	-	Bis(5'-nucleosyl)-tetraphosphatase [asymmetrical] OS=Homo sapiens GN=NUDT2 PE=1 SV=3
4531_1	sp|Q9H3K2|GHITM_HUMAN	10.4498	0.000204499	37180.6	AEVSPMYGVQK;VATMLATGGNR	1;1	2	5	0.0638	250682;176895;176901;186587;186566	-	Growth hormone-inducible transmembrane protein OS=Homo sapiens GN=GHITM PE=1 SV=2
4758_1	sp|Q9HCD5|NCOA5_HUMAN	34.0272	0	65496.5	FDAERPVDCSVIVVNK;GGSPFAIVITQQHQIHR;GPPGPESQSR;NMPQADAMVLVAR;QPLGATSGASLK;SCTVNIMFGTPQEHR;SSTDSLPGPISR;YLTAEETDKIINYLR	1;1;1;1;1;1;1;1	8	15	0.19	587755;603462;137753;369881;369864;369885;378680;201294;557794;255366;255373;255380;255365;255378;585042	-	Nuclear receptor coactivator 5 OS=Homo sapiens GN=NCOA5 PE=1 SV=2
2015_1	sp|Q9H334|FOXP1_HUMAN	18.3485	0.000204499	75269.6	KQQEQLQLQLLQQQHAGK;QLLLQQQQQQQVSGLK;QQEQLQLQLLQQQHAGK	1;1;1	3	4	0.0502	686422;686423;594894;649452	-	Forkhead box protein P1 OS=Homo sapiens GN=FOXP1 PE=1 SV=1
7918_1	sp|O96007|MOC2B_HUMAN	10.6979	0.000204499	20930.7	AASLEAVSYAIDTLK;LPLSPPLVEDSAFEPSR	1;1	2	2	0.1702	444732;589515	-	Molybdopterin synthase catalytic subunit OS=Homo sapiens GN=MOCS2 PE=1 SV=1
3064_1	sp|Q9Y6Q5|AP1M2_HUMAN	6.11616	0.00351617	48078.2	SGYQALPWVR;SVELEDVK;VFLSGMPELR;YITQSGDYQLR	0;0;0;1	1	1	0.0922	231112;231114;231109;231119;93847;212761;212757;212758;223658;212741;212753;212754;223656;327914	-	AP-1 complex subunit mu-2 OS=Homo sapiens GN=AP1M2 PE=1 SV=4
3064_2	sp|Q9BXS5|AP1M1_HUMAN	72.477	0	48556.1	AHFGLPSVEAEDKEGKPPISVK;EGKPPISVK;FEIPYFTTSGIQVR;HNNLYLVATSK;IEYMIK;ILQEYITQEGHK;ILQEYITQEGHKLETGAPRPPATVTNAVSWR;LETGAPRPPATVTNAVSWR;RSTANNVEIHIPVPNDADSPK;SGYQALPWVR;STANNVEIHIPVPNDADSPK;SVELEDVK;TISFIPPDGEFELMSYR;VFLSGMPELR;VLFDNTGR;VVQVFSEYFK;WVPENSEIVWSIK;YITQNGDYQLR	1;1;1;1;1;1;1;1;1;0;1;0;1;0;1;1;1;1	15	58	0.4539	734788;734778;734783;734784;734797;734782;734785;734775;734777;734795;734794;109953;499422;499418;499415;499420;499421;499424;499417;278680;278687;278689;38620;38619;38618;394068;393926;394044;394032;394070;865143;650556;650553;650562;650555;650554;720378;720600;231112;231114;231109;231119;679101;679098;679329;93847;643793;643756;643762;212761;212757;212758;223658;212741;212753;212754;223656;9473…	-	AP-1 complex subunit mu-1 OS=Homo sapiens GN=AP1M1 PE=1 SV=3
6890_1	sp|Q14914|PTGR1_HUMAN	93.3628	0	35846.7	ASPDGYDCYFDNVGGEFSNTVIGQMK;EGDTMMGQQVAK;GGETVMVNAAAGAVGSVVGQIAK;GTIVLASPGWTTHSISDGK;GTIVLASPGWTTHSISDGKDLEK;HFVGYPTNSDFELK;IAICGAISTYNR;KASPDGYDCYFDNVGGEFSNTVIGQMK;KHFVGYPTNSDFELK;LGFDVVFNYK;LKEGDTMMGQQVAK;MEAFVVYR;TAELPPLK;TGPLPPGPPPEIVIYQELR;TVESLEETLK;TVESLEETLKK;VAYLQK;VVGAVGSDEK	1;1;1;1;1;1;1;1;1;1;1;1;1;1;1;1;1;1	18	88	0.5623	820420;820559;298596;674690;674701;670201;670192;618114;618146;618116;618106;750506;750497;750498;750510;750502;750501;750504;750499;497326;497334;497335;497341;497336;497339;497322;497333;497318;497325;325204;325209;325216;325203;831855;559854;559853;560204;559848;560197;560221;246102;246107;246676;436424;436412;436350;444552;436425;436431;444546;444544;436422;452103;444547;444540;452099;139196;…	-	Prostaglandin reductase 1 OS=Homo sapiens GN=PTGR1 PE=1 SV=2
4290_1	sp|Q92667|AKAP1_HUMAN	38.3212	0	97280.9	ALNLIGK;ARETGGAEGTGDAVLGEK;GPSLASLEGEEDKGK;KTESFQNAQAGSNPK;KVQPGYPVVPAEK;LPAEPPALLQTHPPCR;VCQASQLQGQK;VCQASQLQGQKEESCVPVHQK;YVSFLK	1;1;1;1;1;1;1;1;1	9	13	0.1229	13174;530635;426209;472712;368556;566644;271741;271728;755146;755145;755465;23152;23151	-	A-kinase anchor protein 1, mitochondrial OS=Homo sapiens GN=AKAP1 PE=1 SV=1
5640_1	sp|P61160|ARP2_HUMAN	83.1147	0	44732.2	DKDNFWMTR;DLMVGDEASELR;DNFWMTR;EKLCYVGYNIEQEQK;GYAFNHSADFETVR;HIVLSGGSTMYPGLPSR;HLWDYTFGPEK;ILLTEPPMNPTK;KVVVCDNGTGFVK;LCYVGYNIEQEQK;LNIDTR;NWDDMK;QEYQEK;QLYLER;SMLEVNYPMENGIVR;VGNIEIK;VGNIEIKDLMVGDEASELR;VLKGDVEK;VVVCDNGTGFVK	1;1;1;1;1;1;1;1;1;1;1;1;1;1;1;1;1;1;1	19	64	0.3985	252887;252888;260678;323088;323089;117375;117374;117378;117376;607653;476016;476006;476002;476023;476000;476008;555757;555760;555741;356180;356171;356173;356178;356162;356176;356158;356172;356175;333836;333837;333846;343361;333843;343362;333835;333826;374161;374702;374156;491675;491640;491651;14686;43250;49949;49037;49066;546582;546594;546587;553959;546598;553957;553962;553960;554373;553954;29875…	-	Actin-related protein 2 OS=Homo sapiens GN=ACTR2 PE=1 SV=1
8274_1	sp|P22307|NLTP_HUMAN	197.606	0	58955.6	ADCTITMADSDFLALMTGK;AIYHSLGMTGIPIINVNNNCATGSTALFMAR;ALADAQIPYSAVDQACVGYVFGDSTCGQR;ANLVFKEIEK;AVEILAQEMMTDLPSSFEEK;DYPDLAEEAGK;DYPDLAEEAGKK;EATWVVDVK;FVKPGAENSR;GDNTYGGK;GHPLGATGLAQCAELCWQLR;GSVLPNSDK;GSVLPNSDKK;HSVNNPYSQFQDEYSLDEVMASK;HVDLLINK;IEHFAK;IGGIFAFK;ITGNMGLAMK;KADCTITMADSDFLALMTGK;KALADAQIPYSAVDQACVGYVFGDSTCGQR;KLEEEGEQFVK;LEEEGEQFVK;LEEEGEQFVKK;LQNLQLQPGNAK;LQNLQLQPGNAKL;MGFPEAASSFR;MN…	1;1;1;1;1;1;1;1;1;1;1;1;1;1;1;1;1;1;1;1;1;1;1;1;1;1;1;1;1;1;1;1;1;1;1;1;1;1	38	451	0.7532	667291;662427;667273;856377;857353;857351;856430;858369;858416;858417;857355;857435;857392;857389;857305;858372;857436;857308;857442;858474;858419;856475;841367;841422;841360;841359;841362;841419;841420;841512;841514;841517;240530;718648;718646;722640;718641;722628;726544;722633;722902;722906;718637;722643;722662;722639;722890;249902;249903;249897;249900;249899;249892;323633;323635;323641;323656;…	-	Non-specific lipid-transfer protein OS=Homo sapiens GN=SCP2 PE=1 SV=2
4799_1	sp|Q9NWX6|THG1_HUMAN	17.4716	0.000204499	34808.4	DYLSWR;GTVLIWQK;HNFAKPNDSR;TKPVPLHCDIIGDAFWK;VVVYPSNQTLK	1;1;1;1;1	5	5	0.1745	56853;105108;236629;642189;272678	-	Probable tRNA(His) guanylyltransferase OS=Homo sapiens GN=THG1L PE=1 SV=2
2867_1	sp|Q1W6H9|F110C_HUMAN	6.11616	0.00351617	33842.5	SAAPSSVPAAPPGPEPR	1	1	1	0.053	462723	-	Protein FAM110C OS=Homo sapiens GN=FAM110C PE=1 SV=2
5273_1	sp|Q9Y5B9|SP16H_HUMAN	79.1147	0	119838	AASITSEVFNK;APGEQTVPALNLQNAFR;DLGFNGAPYR;ELAAQLNEEAK;ELAAQLNEEAKR;GDKVDILYNNIK;GNENANGAPAITLLIR;ICDVYNAVMDVVKK;MQGSLEAHVNGFR;NAIMFGK;NEDEEEEEEEKDEAEDLLGR;NEGNIFPNPEATFVK;NFDMVIVYK;NVGIFLK;QDSLVINLNR;QKPELLNK;YTEGVQSLNWTK	1;1;1;1;1;1;1;1;1;1;1;1;1;1;1;1;1	17	28	0.1843	224752;224765;224772;578631;578635;578634;578629;578988;188304;254783;344860;355901;355858;481491;497436;386521;386504;32459;749712;509831;509854;510384;509852;200279;36421;228105;117685;375584	-	FACT complex subunit SPT16 OS=Homo sapiens GN=SUPT16H PE=1 SV=1
594_1	sp|P31939|PUR9_HUMAN	86.3034	0	64575.3	AFTHTAQYDEAISDYFR;ANYWWLR;DVSELTGFPEMLGGR;EALGIPAAASFK;GVSQMPLR;HVSPAGAAVGIPLSEDEAK;LDFNLIR;MSSFGDFVALSDVCDVPTAK;NGQVIGIGAGQQSR;NLTALGLNLVASGGTAK;SGVAYIAAPSGSAADK;SLFSNVVTK;TGLVEFAR;TLFGLHLSQK;TLTPISAAYAR;VCMVYDLYK;VVACNLYPFVK;YGMNPHQTPAQLYTLQPK;YTQSNSVCYAK	1;1;1;1;1;1;1;1;1;1;1;1;1;1;1;1;1;1;1	19	36	0.4037	654133;654172;136526;473095;473100;473153;473117;229993;79611;587377;80658;80675;686271;352020;352431;470004;470000;470002;397594;129785;129782;81318;81321;81313;210003;210000;210004;209997;223174;223197;239559;308093;670409;670386;675126;315155	-	Bifunctional purine biosynthesis protein PURH OS=Homo sapiens GN=ATIC PE=1 SV=3
6738_1	sp|Q96QD9|UIF_HUMAN	22.0027	0.000204499	35796.4	GVPLQFDINSVGK;LLQQSGAQQFR;TAVPSFLTK;TSTTNGGILTVSIDNPGAVQCPVTQKPR	1;1;1;1	4	4	0.1918	345493;288289;115010;823204	-	UAP56-interacting factor OS=Homo sapiens GN=FYTTD1 PE=1 SV=3
7984_1	sp|O94826|TOM70_HUMAN	118.39	0	67412	AAAFEQLQK;ADEMYDK;AIDMFNK;ASPAPGSGHPEGPGAHLDMNSLDR;ATFYLLIGNANAAKPDLDK;AVELNPK;CAEGYALYAQALTDQQQFGK;CFALYR;EIDAEGK;ENSGYLK;EPLMPSPQFIK;GFEEVIK;GFEEVIKK;GLLQLQWK;GSMYMQQQQPLLSTQDFNMAADIDPQNADVYHHR;IISECSK;LRPESALAQAQK;NREPLMPSPQFIK;NVDLSTFYQNR;QAYTGNNSSQIQAAMK;QYMEEENYDK;SEMEMAHLYSLCDAAHAQTEVAK;SEMEMAHLYSLCDAAHAQTEVAKK;YEQAIQCYTEAISLCPTEK;YGLKPPTL;YMAEALLLR	1;1;1;1;1;1;1;1;1;1;1;1;1;1;1;1;1;1;1;1;1;1;1;1;1;1	26	68	0.4803	135272;135284;135283;135286;135267;135262;135258;72274;56512;56514;64197;742188;742186;742412;654421;654684;29053;29048;717191;717607;51943;25795;43899;294387;49003;107501;125064;125065;125061;125058;880531;880932;55426;309337;309332;309334;309333;447285;447303;447314;447290;447323;447305;447342;335464;335455;335462;527145;527137;535173;535167;527143;330532;783054;783061;783055;799829;799671;7996…	-	Mitochondrial import receptor subunit TOM70 OS=Homo sapiens GN=TOMM70 PE=1 SV=1
4325_1	sp|Q49AH0|CDNF_HUMAN	23.5291	0.000204499	20950.7	GVNFSLDTIEK;KLDSQICELK;TLDLASVDLR;TLDLASVDLRK;YAATHPK	1;1;1;1;1	5	6	0.2086	258309;263676;184217;184215;262139;34938	-	Cerebral dopamine neurotrophic factor OS=Homo sapiens GN=CDNF PE=1 SV=2
7735_1	sp|Q14676|MDC1_HUMAN	14.9692	0.000204499	226529	AVLALGGSLAGSAAEASHLVTDR;GPLTVEETPR;VVITCPQDFPHCSIPLR;VVLLQR	1;1;1;1	4	4	0.0268	691524;181741;655353;12771	-	Mediator of DNA damage checkpoint protein 1 OS=Homo sapiens GN=MDC1 PE=1 SV=3
7315_1	sp|Q14392|LRC32_HUMAN	12.2323	0.000204499	71933.6	LLGEAPSLHTLSLAENSLTR;VTSLDLSGNSLYSGLLER	1;1	2	3	0.0574	680088;617041;617461	-	Leucine-rich repeat-containing protein 32 OS=Homo sapiens GN=LRRC32 PE=1 SV=1
6425_1	sp|Q9Y3F4|STRAP_HUMAN	87.1483	0	38414	AATAAADFTAK;ALWCSEDKQILSADDK;CVLPEEDSGELAKPK;EISGHTSGIK;EISGHTSGIKK;FSPDGELYASGSEDGTLR;GAVWGATLNK;GHFGPIHCVR;IYDLNKPEAEPK;LWDHATMTEVK;LWQTVVGK;QGDTGDWIGTFLGHK;SFEAPATINSASLHPEK;SFEAPATINSASLHPEKEFLVAGGEDFK;TVDFTQDSNYLLTGGQDK;TYGLWK;VWDAVSGDELMTLAHK;YDYNSGEELESYK	1;1;1;1;1;1;1;1;1;1;1;1;1;1;1;1;1;1	18	35	0.6229	149395;599711;600017;507157;507144;145877;218182;218178;218177;607610;140499;232874;232871;370451;370462;370874;370958;321056;321059;98387;485677;567531;567527;831103;831047;643721;644054;643718;644378;27856;27858;555619;555626;555625;467755	-	Serine-threonine kinase receptor-associated protein OS=Homo sapiens GN=STRAP PE=1 SV=1
3494_1	sp|O60504|VINEX_HUMAN	80.5625	0	75294.9	AMYQYRPQNEDELELR;DFVYPSSTR;DPSASNGGGSPAR;ELAELSAELDKDLR;EVDKNWLEGEHHGR;FDFQAQSPK;GDIVYIHK;GPSHPLDLGTSSPNTSQIHWTPYR;HPSSPSALR;IPASQHTQNWSATWTK;KGEHICLIR;LCDDGPQLPTSPR;LKFDFQAQSPK;MADGGSPFLGR;QGIFPASYVQVSR;TGFSFPTQEPRPQTQNLGTPGPALSHSR;VDVMQQCDDGWFVGVSR	1;1;1;1;1;1;1;1;1;1;1;1;1;1;1;1;1	17	26	0.3353	660268;165763;229120;470805;524331;164321;104726;790856;791160;108338;108333;108337;108323;590321;198294;392272;307542;307539;187018;390446;390445;390442;832596;832821;642316;642315	-	Vinexin OS=Homo sapiens GN=SORBS3 PE=1 SV=2
1910_2	sp|Q92688|AN32B_HUMAN	17.5081	0.000204499	28770.3	DISTLEPLKK;IFGGLDMLAEK;IHLELR;KLELSENR;LPNLTHLNLSGNK;RIHLELR;SLDLFNCEVTNLNDYR	1;1;0;1;1;0;0	4	8	0.259	210033;210035;241685;241678;32601;32580;126196;372989;372995;373615;101422;634448;634453;634451;634446	-	Acidic leucine-rich nuclear phosphoprotein 32 family member B OS=Homo sapiens GN=ANP32B PE=1 SV=1
3207_1	sp|Q15493|RGN_HUMAN	46.1022	0	33231.4	DGMDPEGLLR;EQSAVVLATVDNDKK;FCALNWK;HQGALYSLFPDHHVK;KYFDQVDISNGLDWSLDHK;NYSEMYVTCAR;QSGGYVATIGTK;SVYKLEK;TTSCCFGGK;VTMDAPVSSVALR;YFAGTMAEETAPAVLER	1;1;1;1;1;1;1;1;1;1;1	11	17	0.4515	183871;477891;477887;101970;545366;545353;545351;545358;722096;356570;356568;234276;70382;140662;338834;590282;590283	-	Regucalcin OS=Homo sapiens GN=RGN PE=1 SV=1
3286_1	sp|P14222|PERF_HUMAN	36.3629	0	61338.7	ALSQYLTDR;FLRPDGTCTLCENALQEGTLQR;FVPGAWLAGEGVDVTSLR;FVPGAWLAGEGVDVTSLRR;LFFGGQELR;LISNYGTHFIR;LPLALTNWR;TSTVWDNNNPIWSVR	1;1;1;1;1;1;1;1	8	8	0.1694	164016;780760;597713;652772;164068;315526;172272;563054	-	Perforin-1 OS=Homo sapiens GN=PRF1 PE=1 SV=1
8313_1	sp|O43149|ZZEF1_HUMAN	56.8069	0	330864	ASTIFSTGTESAFQVTQIR;AVIVDVK;EKYPVLK;FQTGFEILK;FTVTAGHLGR;IWMLEMK;KAQAQSILEVLK;KLDVETWQQEQPVVLHTWTK;LISSTESELQQSYAK;NTLLNGAAIFFPNR;SGPENLLVEPWTR;VNEATAVLYAR;YVNSGGK	1;1;1;1;1;1;1;1;1;1;1;1;1	13	16	0.051	657462;18547;75486;171682;159932;159908;107783;319612;759619;513389;442830;415214;415241;249365;249361;11388	-	Zinc finger ZZ-type and EF-hand domain-containing protein 1 OS=Homo sapiens GN=ZZEF1 PE=1 SV=6
4486_1	sp|Q5VVQ6|OTU1_HUMAN	15.8837	0.000204499	38298.3	ELQGQIAAITGIAPGGQR;ETLPVLTR;VLLIYDGIHYDPLQR	1;1;1	3	3	0.1178	559275;97241;574243	-	Ubiquitin thioesterase OTU1 OS=Homo sapiens GN=YOD1 PE=1 SV=1
5482_1	sp|Q16719|KYNU_HUMAN	72.4268	0	52318.2	AATKKPVVNIITPSHVEER;DENAIYFLGNSLGLQPK;DVFQELEK;DVFQELEKR;ECFYIPK;FTNLLTSILDSAETK;IAAYGHEVGK;IEDILEVIEK;KPVVNIITPSHVEER;LQLIPGVCGFR;RPWITGDESIVGLMK;TYLEEELDK;TYLEEELDKWAK;VALHLDEEDKLR;VAPVPLYNSFHDVYK;YLNAGAGGIAGAFIHEK	1;1;1;1;1;1;1;1;1;1;1;1;1;1;1;1	16	50	0.3634	671004;671003;600132;135985;222947;110932;110927;497072;152133;245754;245758;530902;530911;530913;530910;530912;530839;531352;530904;530906;278853;522612;522557;530778;522568;530772;530762;207569;429971;429973;429967;429982;429974;429972;429987;382175;382178;382166;382176;545396;545407;545383;545399;545384;545398;545810;545866;545812;516115;516110	-	Kynureninase OS=Homo sapiens GN=KYNU PE=1 SV=1
2464_1	sp|Q96F85|CNRP1_HUMAN	20.4475	0.000204499	18636.6	DHCQWGSPFSVIEYECKPNETR;FYNYHK;IQPNDGPVFYK;VVYTGTYDTEGVTPTK	1;1;1;1	4	7	0.3354	802528;802530;802737;72320;289418;289395;537064	-	CB1 cannabinoid receptor-interacting protein 1 OS=Homo sapiens GN=CNRIP1 PE=1 SV=1
990_1	sp|P14927|QCR7_HUMAN	29.397	0	13522	ALDLNLK;DDTIYEDEDVK;DDTIYEDEDVKEAIR;EQWTKYEEENFYLEPYLK;RLPENLYNDR;YEEENFYLEPYLK	1;1;1;1;1;1	6	32	0.4505	34670;34662;34673;34681;34654;326641;572553;572569;572544;572556;749959;295848;295839;295847;295849;295850;295856;295872;295854;295853;295844;295865;295845;295863;295855;295860;295840;539846;540190;539851;540213;539845	-	Cytochrome b-c1 complex subunit 7 OS=Homo sapiens GN=UQCRB PE=1 SV=2
6899_1	sp|O95372|LYPA2_HUMAN	22.117	0.000204499	24720.7	DLAILQCHGELDPMVPVR;FGALTAEK;IPVTLNMK;NGIPANR;SVVTPAR;YICPHAPR	1;1;1;1;1;1	6	17	0.2424	663266;663258;663262;663531;663253;55521;92881;99017;92878;92910;92863;92882;18056;13778;138720;138722;138715	-	Acyl-protein thioesterase 2 OS=Homo sapiens GN=LYPLA2 PE=1 SV=1
3653_1	sp|Q86SE5|RALYL_HUMAN	6.519	0.00224803	32310.6	IVGCSVHK;KELTQIK;TKIDSLLGR;VFIGNLNTAIVK	0;0;1;1	2	6	0.1237	84069;84037;84071;84051;84063;84044;67004;133949;295608;295612;295611;296233;295607	-	RNA-binding Raly-like protein OS=Homo sapiens GN=RALYL PE=1 SV=2
3653_2	sp|P07910|HNRPC_HUMAN	69.3523	0	33649.5	AAVAGEDGR;GFAFVQYVNER;IVGCSVHK;KELTQIK;KSDVEAIFSK;LKGDDLQAIK;MIAGQVLDINLAAEPK;MYSYPAR;NDKSEEEQSSSSVK;QKVDSLLENLEK;SDVEAIFSK;SEEEQSSSSVK;VDSLLENLEK;VFIGNLNTLVVK;VPPPPPIAR	1;1;0;0;1;1;1;1;1;1;1;1;1;1;1	13	84	0.4085	59750;59754;320315;320316;320319;320314;320317;320305;321062;320300;320310;321054;320307;320304;320312;320309;320344;84069;84037;84071;84051;84063;84044;67004;196885;196883;196901;196802;196812;182973;182961;182954;513024;513019;520904;520906;513042;513002;513041;520895;513006;520899;513015;513023;520911;513044;520907;513012;513032;513494;86425;86424;445319;445316;370031;370027;370029;370024;1300…	-	Heterogeneous nuclear ribonucleoproteins C1/C2 OS=Homo sapiens GN=HNRNPC PE=1 SV=4
5187_1	sp|Q9BTX7|TTPAL_HUMAN	17.2952	0.000204499	38491	KVIGILQDGFPIR;LRDVQALR;VIGILQDGFPIR;WIPSNYPITENIR	1;1;1;1	4	5	0.0994	392624;118099;319594;319592;471143	-	Alpha-tocopherol transfer protein-like OS=Homo sapiens GN=TTPAL PE=1 SV=2
2984_1	sp|Q96KR1|ZFR_HUMAN	126.919	0	116939	AGYSQGATQYTQAQQTR;AISSASSPQSPGDALR;AISSASSPQSPGDALRR;ANGLQSCVIIIR;CAVSEAAIILNSCVEPK;CLDALAALR;DPPDVLDR;EGDVTSGMVKDPPDVLDR;FNIHNNR;GSPGLLDPCEKDPFDTLATMTDQQR;HATIYPTEEELQAVQK;INFVGGNK;ISCAGPQTYK;ISCAGPQTYKEHLEGQK;IVSITER;LVSDSLSEHEK;NVNLVLLCSEKPSK;QAAAAAAAAAATAAWTGTTFTK;QDTVSEPVTPASLAALQSDVQPVGHDYVEEVR;QDTVSEPVTPASLAALQSDVQPVGHDYVEEVRNDEGK;QLAVISPEK;STAPAVAYDSK;STPVTSAVQIPEVK;VFECISSGIILK;VLGMDPLPQ…	1;1;1;1;1;1;1;1;1;1;1;1;1;1;1;1;1;1;1;1;1;1;1;1;1;1;1	27	62	0.3147	591358;591375;591363;440686;440688;440690;440655;440705;521309;521362;521346;328146;328145;328147;592193;592189;592192;592188;592199;592755;592179;133628;133640;133647;133649;96277;619157;91923;809483;809477;809487;590762;590772;590769;61509;197422;625342;624813;625334;47247;269824;269829;470379;470374;470377;470376;470859;650500;863701;881249;124565;188327;392581;341003;341018;341017;341013;4098…	-	Zinc finger RNA-binding protein OS=Homo sapiens GN=ZFR PE=1 SV=2
4579_1	sp|P51572|BAP31_HUMAN	36.6632	0	27974	AENQVLAMR;LDVGNAEVK;LDVGNAEVKLEEENR;LKDELASTK;LLEEHAK;LQAAVDGPMDKK;QAESASEAAK;VNLQNNPGAMEHFHMK;YMEENDQLK	1;1;1;1;1;1;1;1;1	9	13	0.3537	153794;147802;104677;529067;529045;529710;134933;57077;285995;127802;594665;594664;226208	-	B-cell receptor-associated protein 31 OS=Homo sapiens GN=BCAP31 PE=1 SV=3
1950_1	sp|Q15393|SF3B3_HUMAN	195.525	0	135492	AEVIMNYHVGETVLSLQK;AGNGQWASVIR;AVMISAIEK;DLILNPR;DYIVVGSDSGR;FGNICVVR;FLAVGLVDNTVR;FSNTGEDWYVLVGVAK;FVIHPESNNLIIIETDHNAYTEATK;GLLNGASQK;GMIFVCSATHK;HGLEVSEMAVSELPGNPNAVWTVR;HIANYISGIQTIGHR;IHQETFGK;ILELLRPDPNTGK;IVILEYQPSK;IVPGQFLAVDPK;KEMSADVVCMSLANVPPGEQR;KFVIHPESNNLIIIETDHNAYTEATK;LGAVFNQVAFPLQYTPR;LPPNTNDEVDEDPTGNK;LTISSPLEAHK;LVNNGEKLEFLHK;LVYILNR;MFLYNLTLQR;MQGQEAVLAMSSR;NENQLIIFADDTYPR;NVI…	1;1;1;1;1;1;1;1;1;1;1;1;1;1;1;1;1;1;1;1;1;1;1;1;1;1;1;1;1;1;1;1;1;1;1;1;1;1;1;1;1;1	42	117	0.4067	653091;653089;219488;219497;219493;219495;220656;220075;114044;121366;57446;225095;115257;304710;304720;304707;304708;561037;561044;818954;818738;818955;818848;79686;282499;274200;274198;783257;511452;112649;398385;398403;398407;398394;398380;398387;398386;398383;398384;398401;239372;239366;292798;292799;730763;831687;831758;831686;831756;616190;616192;616189;616194;616196;616181;616186;616524;58…	-	Splicing factor 3B subunit 3 OS=Homo sapiens GN=SF3B3 PE=1 SV=4
5140_1	sp|P01130|LDLR_HUMAN	8.26409	0.00039093	95313.6	AHGVSSYDTVISR;LAHPFSLAVFEDK	1;1	2	2	0.0302	355607;402398	-	Low-density lipoprotein receptor OS=Homo sapiens GN=LDLR PE=1 SV=1
8106_1	sp|Q9UKZ1|CNO11_HUMAN	22.1543	0.000204499	55180.3	FFLSQLMLAPPR;GGQEPDRPPLSGFLPPITPPEK;LVYHIGLTPAK;SPLSSPQQTQLLGELEKDPK	1;1;1;1	4	5	0.1275	372472;733186;733187;252685;699715	-	CCR4-NOT transcription complex subunit 11 OS=Homo sapiens GN=CNOT11 PE=1 SV=1
3956_1	sp|Q9Y6C2|EMIL1_HUMAN	91.8732	0	106601	APAPASAPPGPSEELLR;AVETAFNGR;GLEEGQAQAGQCPSLEGR;GTELGGAAGQGGHPPGYTSLASR;GVLQGLSGR;HLAGLAVGR;LDTVAGGLQGLR;LGQLEGLLQAHGDEGCGACGGVQEELGR;LHQLSLK;LQESCSVCLAGLDGFR;LQQEATEHATESEER;LVGGQAGLGR;LVGSGLHTVEAAGEAR;QATLEGLQEVVGR;RGTELGGAAGQGGHPPGYTSLASR;RPPQECCSPELGRR;VDAQDETAAEFTLR;VLLNDGGYYDPETGVFTAPLAGR;VQQLEEQVQSLTK;YLLSAVLTGHR	1;1;1;1;1;1;1;1;1;1;1;1;1;1;1;1;1;1;1;1	20	33	0.2736	500731;500718;115649;603256;685174;684783;79399;81759;81772;81766;81762;245241;823356;56754;572934;549796;549207;96814;451882;451885;360224;725916;541994;451232;451285;752955;433077;433085;433078;434781;433080;261597;261595	-	EMILIN-1 OS=Homo sapiens GN=EMILIN1 PE=1 SV=2
5974_1	sp|Q9NQ48|LZTL1_HUMAN	32.6699	0	34571.1	ALQDLQLDQGNQK;ALQDLQLDQGNQKDFIK;AQDLSNLENTVAALK;LAPLNEGGTAELLNK;QLFAQAEK;SLEENLATAK;TIEIQATNALDEK	1;1;1;1;1;1;1	7	16	0.2609	400826;634896;462223;462226;462207;462217;462773;462211;462219;438900;438932;100380;100362;167632;386788;386733	-	Leucine zipper transcription factor-like protein 1 OS=Homo sapiens GN=LZTFL1 PE=1 SV=1
3026_1	sp|Q9P0P8|CF203_HUMAN	13.7237	0.000204499	27923.8	NKVEDAFYK;TGLDIGR;VGDTLDLLIGEDKEAGTETVMR	1;1;1	3	5	0.1583	190435;190422;14682;740558;743905	-	Uncharacterized protein C6orf203 OS=Homo sapiens GN=C6orf203 PE=1 SV=1
7400_1	sp|Q15800|MSMO1_HUMAN	6.11616	0.00351617	35192.6	IFGTDSQYNAYNEK	1	1	1	0.0478	494794	-	Methylsterol monooxygenase 1 OS=Homo sapiens GN=MSMO1 PE=1 SV=1
6987_1	sp|Q9UFC0|LRWD1_HUMAN	9.02428	0.00039093	70816.2	LEELSLEGNPFLTVNDNLK;VSFLLPTLR	1;1	2	2	0.0433	686166;152888	-	Leucine-rich repeat and WD repeat-containing protein 1 OS=Homo sapiens GN=LRWD1 PE=1 SV=2
2902_1	sp|O75907|DGAT1_HUMAN	6.11616	0.00351617	55242.5	LQDSLFSSDSGFSNYR	1	1	1	0.0328	577514	-	Diacylglycerol O-acyltransferase 1 OS=Homo sapiens GN=DGAT1 PE=1 SV=2
1452_1	sp|P51580|TPMT_HUMAN	53.9882	0	28162.1	FDMIWDR;GALVAINPGDR;GALVAINPGDRK;HLDTFLK;HPGPPFYVPHAEIER;LYLLTEK;NQVLTLEEWQDKWVNGK;SSSGNISLYCCSIFDLPR;TAFHQEQGHQLLK;TAFHQEQGHQLLKK;TSLDIEEYSDTEVQK;VFFPLCGK	1;1;1;1;1;1;1;1;1;1;1;1	12	33	0.4898	123400;123395;171698;252053;252049;252048;252054;73795;73804;543800;76907;76898;670414;670415;670647;670921;666987;666997;437163;437169;437167;437155;437158;503346;503347;503349;503344;548768;548764;549231;116803;116788;116806	-	Thiopurine S-methyltransferase OS=Homo sapiens GN=TPMT PE=1 SV=1
4707_1	sp|P35568|IRS1_HUMAN	11.3834	0.000204499	131509	CPSQLQPAPR;EVWQVILKPK;HSAFVPTR;NLIGIYR	1;1;1;1	4	4	0.0282	216444;267565;91969;61622	-	Insulin receptor substrate 1 OS=Homo sapiens GN=IRS1 PE=1 SV=1
5237_1	sp|Q96N67|DOCK7_HUMAN	17.612	0.000204499	242407	DVYVPNTTYR;EALQPLINR;EAYTAVVYHNR;GFVFSLIK;VLIPIHEANR	1;1;1;1;1	5	5	0.0224	260296;157356;316216;90356;221647	-	Dedicator of cytokinesis protein 7 OS=Homo sapiens GN=DOCK7 PE=1 SV=4
7962_1	sp|P51571|SSRD_HUMAN	24.3767	0.000204499	18986.6	FFDEESYSLLR;NNEDISIIPPLFTVSVDHR;SAHAGTYEVR;VQNMALYADVGGK;YQVSWSLDHK	1;1;1;1;1	5	21	0.3642	363776;363790;363799;691514;176776;340851;350091;350082;350099;340831;340811;340819;350712;350714;350096;340837;340821;341500;280238;280228;280243	-	Translocon-associated protein subunit delta OS=Homo sapiens GN=SSR4 PE=1 SV=1
7177_1	sp|Q9UNI6|DUS12_HUMAN	11.5216	0.000204499	37662.9	EGSGPIAFAHK;LGSFNWYGEQCSCGR;MTPSSMLTTGR	1;1;1	3	3	0.1088	190455;576657;243674	-	Dual specificity protein phosphatase 12 OS=Homo sapiens GN=DUSP12 PE=1 SV=1
4851_1	sp|Q7Z4W1|DCXR_HUMAN	113.55	0	25896.6	AVIQVSQIVAR;AVTNHSVYCSTK;AVTNHSVYCSTKGALDMLTK;EAFDRSFEVNLR;ECPGIEPVCVDLGDWEATER;ELFLAGR;GALDMLTK;GTVQALHATGAR;GVPGAIVNVSSQCSQR;IRVNAVNPTVVMTSMGQATWSDPHK;MELFLAGR;MELFLAGRR;SFEVNLR;SGMTTGSTLPVEGGFWAC;TMLNRIPLGK;TQADLDSLVR;VLVTGAGK;VLVTGAGKGIGR;VMALELGPHK;VMALELGPHKIR;VNAVNPTVVMTSMGQATWSDPHK;VNAVNPTVVMTSMGQATWSDPHKAK;VVAVSRTQADLDSLVR	1;1;1;1;1;1;1;1;1;1;1;1;1;1;1;1;1;1;1;1;1;1;1	23	2459	0.791	235850;235880;235828;235870;235863;235878;235902;235877;235823;235871;235825;235882;235892;235885;235853;235835;235917;235811;235817;235814;235881;235846;235897;236378;235913;235854;236376;235826;235920;235832;235807;235918;235909;236374;235829;235873;235876;235900;235824;235843;235899;235923;235874;235815;235822;235914;235905;235836;235855;235884;235875;236367;235865;235848;235889;235813;235816;…	-	L-xylulose reductase OS=Homo sapiens GN=DCXR PE=1 SV=2
4019_1	sp|P26373|RL13_HUMAN	62.6001	0	24246.5	AKEAAEQDVEK;EAAEQDVEK;EAAEQDVEKK;GFSLEELR;KGDSSAEELK;LATQLTGPVMPVR;LILFPR;NGMVLKPHFHK;NKSTESLQANVQR;STESLQANVQR;TIGISVDPR;VATWFNQPAR;VITEEEK;VITEEEKNFK	1;1;1;1;1;1;1;1;1;1;1;1;1;1	14	56	0.4834	255820;255811;255809;255807;141163;211380;211377;107794;107790;107796;107797;107804;162437;162447;351019;351011;359794;359792;351001;351021;359786;351013;350998;359760;24637;24624;24628;24640;24634;24626;24627;24635;24630;24644;24648;24631;24639;307535;307528;403246;403245;262982;262991;262975;262974;262989;111607;239138;239141;239146;239127;239157;239133;60877;265413;265406	-	60S ribosomal protein L13 OS=Homo sapiens GN=RPL13 PE=1 SV=4
6858_1	sp|P49840|GSK3A_HUMAN	26.6032	0.000204499	50949	DIKPQNLLVDPDTAVLK;LTIPILYVK;SLAYIHSQGVCHR;TPPEAIALCSSLLEYTPSSR;VTTVVATLGQGPER;VYMYQLFR	1;1;1;1;1;1	6	12	0.1677	599858;599856;160687;431550;431537;698920;698928;698925;376771;376770;376766;194150	-	Glycogen synthase kinase-3 alpha OS=Homo sapiens GN=GSK3A PE=1 SV=2
5148_1	sp|P37059|DHB2_HUMAN	71.3207	0	42757	AAVTMFSSVMR;AVLVTGGDCGLGHALCK;DFSPVLR;DILDHLPAEVQEDYGQDYILAQR;DIQHAILAK;LASYGSSK;LEKDILDHLPAEVQEDYGQDYILAQR;LSVLQMDITKPVQIK;LVNVSSMGGGAPMER;SPFAYYTPGK;TFLPLLR;VAAMLQDR;VASIQPGGFLTNIAGTSDK;VASIQPGGFLTNIAGTSDKWEK	1;1;1;1;1;1;1;1;1;1;1;1;1;1	14	50	0.4005	245036;254661;535251;535244;535271;535247;54393;797596;797700;136706;136710;136667;136668;44799;44798;837378;527848;527846;527847;527849;536208;419241;419231;428122;428096;428101;419653;436941;201657;201641;201651;67040;67038;67045;67039;67043;67041;67042;94105;598547;730844;730849;731071;730847;730846;731065;730848;730842;731073;731266	-	Estradiol 17-beta-dehydrogenase 2 OS=Homo sapiens GN=HSD17B2 PE=1 SV=1
1404_1	sp|Q13496|MTM1_HUMAN	45.3508	0	69887.6	CSQPLVGMSGK;DMFEILTR;FGTFLFNCESAR;IPVLSWIHPENK;ITFINK;LTIYDARPSVNAVANK;LVLTGAIQVADK;NRIPVLSWIHPENK;QGLPNHHWR;RLEELQLANSAK;TVSLWSLINSNK	1;1;1;1;1;1;1;1;1;1;1	11	20	0.1857	222529;143903;388400;379421;379420;379415;16396;537725;537708;260573;523185;523665;210402;210407;210935;210406;344895;344969;338921;338928	-	Myotubularin OS=Homo sapiens GN=MTM1 PE=1 SV=2
2705_2	sp|Q6P1M3|L2GL2_HUMAN	43.1475	0	113377	CTLHPSDQLALEGPLSR;FLRPGHDPVR;FWDASGVCLR;LLVSCHSDGSYCQWPVSSEAQQPEPLR;LVAFGTSHGFGLFDHQQR;QGLPFTIFQGGMPR;QNAHFSTMEWPIDGGTSLTPAPPQR;TLYFADTYLK;TVEHGFPHQPSALGYSPSLR;VFTLPK;VGSFDPYSDDPR	1;1;1;1;1;1;1;1;1;0;1	10	12	0.1657	605410;241783;241782;251690;842548;648572;443325;802553;264221;695506;695499;3210;334038	-	Lethal(2) giant larvae protein homolog 2 OS=Homo sapiens GN=LLGL2 PE=1 SV=2
2705_1	sp|Q15334|L2GL1_HUMAN	10.8118	0.000204499	115346	APVVAIAVLDGR;DAATVTQMHFLTGQGR;VFTLPK	1;1;0	2	2	0.032	233911;538429;3210	-	Lethal(2) giant larvae protein homolog 1 OS=Homo sapiens GN=LLGL1 PE=1 SV=3
7212_1	sp|Q8WXX5|DNJC9_HUMAN	29.6555	0	29891.1	AVYDEQGTVDEDSPVLTQDRDWEAYWR;ELGLDEGVDSLK;ISLEDIQAFEK;KISLEDIQAFEK;VSLQVHPDR;VYSVLSDR	1;1;1;1;1;1	6	7	0.2615	852002;287270;297838;372959;155530;155522;102061	-	DnaJ homolog subfamily C member 9 OS=Homo sapiens GN=DNAJC9 PE=1 SV=1
6544_1	sp|O75746|CMC1_HUMAN	20.5627	0.000204499	74714.8	AGQTTYSGVIDCFR;AGQTTYSGVIDCFRK;GLIPQLIGVAPEK;IAPLAEGALPYNLAELQR;IVQLLAGVADQTK;IYSTLAGTR;LQVAGEITTGPR;LTVNDFVR;NIFLQYASTEVDGER;YEGFFGLYR	0;0;1;1;1;0;0;0;1;0	4	10	0.1652	456002;455998;456005;455994;456444;522939;522951;522947;522948;323480;323465;323478;323477;323476;323467;323458;622404;335225;123220;123224;268765;268744;268747;268740;268758;268734;114962;114949;114930;542085;215104;215099;215120;215112;215082	-	Calcium-binding mitochondrial carrier protein Aralar1 OS=Homo sapiens GN=SLC25A12 PE=1 SV=2
6544_2	sp|Q9UJS0|CMC2_HUMAN	93.6016	0	74128.6	AGKGEVTFEDVK;AGQTTYSGVIDCFR;AGQTTYSGVIDCFRK;ASGDSARPVLLQVAESAYR;DIPFSAIYFPCYAHVK;DLGFFGIYK;DVEVTKEEFVLAAQK;GEVTFEDVK;IAPLEEGTLPFNLAEAQR;ILREEGPK;INLPAPNPDHVGGYK;IYSTLAGTR;LAVATFAGIENK;LQVAGEITTGPR;LTVNDFVR;MTLADIER;NGEFFMSPNDFVTR;QAFVQR;STGSFVGELMYK;TVELLSGVVDQTK;VSALSVVR;VTAIDFR;YASIEKNGEFFMSPNDFVTR;YEGFFGLYR;YLNIFGESQPNPK	1;0;0;1;1;1;1;1;1;1;1;0;1;0;0;1;1;1;1;1;1;1;1;0;1	19	165	0.3911	290654;290630;456002;455998;456005;455994;456444;522939;522951;522947;522948;640182;640185;640180;640188;640184;640191;640194;640193;618428;618436;618430;160378;160385;160380;160388;160394;160383;160384;160375;524587;524602;524585;524586;524601;524588;524593;524581;524592;524926;524960;143409;633420;633423;633408;633403;633402;633415;633411;633430;633427;633425;633413;633432;633399;633396;633400;…	-	Calcium-binding mitochondrial carrier protein Aralar2 OS=Homo sapiens GN=SLC25A13 PE=1 SV=2
7501_1	sp|P55201|BRPF1_HUMAN	5.07477	0.00789293	137412	LVPLGVNQDLDKEK	1	1	1	0.0115	452434	-	Peregrin OS=Homo sapiens GN=BRPF1 PE=1 SV=2
1482_2	sp|Q14766|LTBP1_HUMAN	8.57157	0.00039093	186673	CTCGQGYQLSAAK;HLCAHGQCR;LCQIPVHGASVPK;QLCCCSVGK	1;1;1;1	4	4	0.0256	385187;207022;364276;189319	-	Latent-transforming growth factor beta-binding protein 1 OS=Homo sapiens GN=LTBP1 PE=1 SV=4
7693_1	sp|Q9Y2W6|TDRKH_HUMAN	16.6516	0.000204499	62007.4	AAIHQILTENTPVSEQLSVPQR;NTSSSMEPTAPLVTPPPK;TSWTSLSTIQK;VLLISGFPVQVCK	1;1;1;1	4	4	0.1141	753796;589848;274853;394930	-	Tudor and KH domain-containing protein OS=Homo sapiens GN=TDRKH PE=1 SV=2
6850_1	sp|Q96CU9|FXRD1_HUMAN	33.5557	0	53777.7	AVAEMVLK;EGLGSNYLGGR;FNPSGYLLLASEK;FYLGEK;GGFSLDWDGK;SPTEQEEPDPANLEVDHDFFQDK;VPAFETLK;VQSLGVLFCQGEVTR	1;1;1;1;1;1;1;1	8	11	0.1934	75213;196703;382725;383295;23044;170827;796045;796210;796049;87234;517866	-	FAD-dependent oxidoreductase domain-containing protein 1 OS=Homo sapiens GN=FOXRED1 PE=1 SV=2
2699_1	sp|Q9Y2W2|WBP11_HUMAN	50.3172	0	69953.9	ADDTSAATIEKK;AQLSQYFDAVK;ATATISAKPQITNPK;ELTPLQAMMLR;ENPDIYK;FMNPTDQAR;GATAAPQR;KLEVEYEQK;LDEMEFNPVQQPQLNEK;RAQLSQYFDAVK;SEDDSAVPLAK;TSAYGPPTR	1;1;1;1;1;1;1;1;1;1;1;1	12	22	0.1872	273684;284361;284363;439453;439891;439447;303952;76214;169531;169532;169534;179792;29339;224171;662098;375766;375769;376187;202260;107270;107268;107274	-	WW domain-binding protein 11 OS=Homo sapiens GN=WBP11 PE=1 SV=1
1959_1	sp|O00139|KIF2A_HUMAN	7.7057	0.000581846	79904.6	ARPSQFPEQSSSAQQNGSVSDISPVQAAK;QQVQVVGLQER;YLENQTFR	1;1;1	3	3	0.068	832027;292722;165429	-	Kinesin-like protein KIF2A OS=Homo sapiens GN=KIF2A PE=1 SV=3
5736_1	sp|Q9UGJ1|GCP4_HUMAN	7.37868	0.000765111	76041.3	SGLQVSQDFPFLHPSETSVLNR;TPPTAVTEHDVNVAFQQSAHK	1;1	2	4	0.0645	758404;758193;721055;721053	-	Gamma-tubulin complex component 4 OS=Homo sapiens GN=TUBGCP4 PE=1 SV=1
2209_1	sp|Q8IWL3|HSC20_HUMAN	36.8038	0	27404.7	ALQAPDPTR;DYFSLMDCNR;HSTLVNDAYK;LAEAESEAAMK;LHGIEIPER;LVHPDFFSQR;QFLIEIMEINEK;SQTEKDFSEK;TLLAPLSR;YQQLQR	1;1;1;1;1;1;1;1;1;1	10	16	0.4043	117195;314518;212026;213256;162660;162661;271171;271176;271179;420327;244452;72135;72101;72220;55149;55158	-	Iron-sulfur cluster co-chaperone protein HscB, mitochondrial OS=Homo sapiens GN=HSCB PE=1 SV=3
1113_1	sp|Q9NZM3|ITSN2_HUMAN	63.9699	0	193340	ALYPFEAR;AQALCSWTAK;EAAKQELER;EQEEIVR;ETASVLVNYR;ETYNTQQLALEQLYK;FCSCQLNGAALLQQK;KLPVTFEDK;LPVTFEDKR;LQGQQLPVVLPPIMK;LSEMDSFNNQLK;NLHLELEALNGK;QLQQELQEYQNK;QPPMFSPLISAR;TGTSEWAVPQPTR;TPIFLNEVLVK	1;1;1;1;1;1;1;0;1;1;1;1;1;1;1;0	14	18	0.1008	116276;205359;166681;86062;215402;585011;585033;584986;540283;168311;168315;185538;501331;501329;375542;332124;443760;328084;377547;377554;286186	-	Intersectin-2 OS=Homo sapiens GN=ITSN2 PE=1 SV=3
3341_1	sp|Q14108|SCRB2_HUMAN	30.0991	0	54255.5	AYVFER;DEVLYVFPSDFCR;IVEWNGK;KLDDFVETGDIR;NGAPIIMSFPHFYQADER;TSLDWWITDK;VEEVGPYTYR	1;1;1;1;1;1;1	7	21	0.159	33623;33620;33619;33621;493228;493227;59869;59878;365345;365342;672180;672178;672219;672176;672184;672175;671912;281320;281319;281307;252971	-	Lysosome membrane protein 2 OS=Homo sapiens GN=SCARB2 PE=1 SV=2
1113_2	sp|Q15811|ITSN1_HUMAN	130.405	0	195300	AGVFPSNYVR;ALYPFESR;DKQWLEHVQQEDEHQRPR;DQLDEVEKETR;GEVNGQVGLFPSNYVK;IAEITHLQQQLQESQQMLGR;ITPTEPPK;KLPVTFEDK;KNPGGWWEGELQAR;LFHQHQEPAKPAVQAPWSTAEK;LFHQHQEPAKPAVQAPWSTAEKGPLTISAQENVK;LISGPIR;LLSPGTSK;LPEEPVLEDEQQQLEK;LQEIDIFNNQLK;LQGYQLPSALPPVMK;MDQVEFSIAMK;NKEQEDIVVLK;NPGGWWEGELQAR;QALLEQQR;QILNDQLK;QVQQNSLHR;RQELLNQR;SAFTPATATGSSPSPVLGQGEKVEGLQAQALYPWR;SGPGSQLNTK;SGSGISVISSTSVDQR;SKLQEIDIFNNQLK;T…	1;1;1;1;1;1;1;0;1;1;1;1;1;1;1;1;1;1;1;1;1;1;1;1;1;1;1;1;1;0;1	29	46	0.222	188412;188425;123517;739801;739799;338564;525989;738381;738375;742100;738699;77921;77926;168311;168315;483427;766197;766201;765990;765983;875321;22926;41092;616974;616976;403347;403344;490973;301141;311185;416738;124924;118419;188469;158932;158933;158931;158929;870827;126090;458572;458581;516596;516598;871070;443889;286186;433569;433587	-	Intersectin-1 OS=Homo sapiens GN=ITSN1 PE=1 SV=3
3521_1	sp|Q8NDX1|PSD4_HUMAN	19.427	0.000204499	116177	AQPSLPAGK;INLAAATHSAPPFPAAVGSQR;SMSCQEFITNLNGLR;VAWNLASR	1;1;1;1	4	4	0.0502	70999;667190;554757;93155	-	PH and SEC7 domain-containing protein 4 OS=Homo sapiens GN=PSD4 PE=1 SV=2
3391_2	sp|O14602|IF1AY_HUMAN	8.10168	0.00039093	16432.3	AYGELPEHAK;DYQDNKADVILK;ELVFKEDGQEYAQVIK;LEALCFDGVK;LEALCFDGVKR	0;0;0;1;1	2	2	0.3403	190951;373461;373431;606057;606065;606066;606344;215352;307016	-	Eukaryotic translation initiation factor 1A, Y-chromosomal OS=Homo sapiens GN=EIF1AY PE=1 SV=4
1436_1	sp|P28838|AMPL_HUMAN	122.747	0	56130.8	AAGIDEQENWHEGK;AAGIDEQENWHEGKENIR;AAVAAGCR;ADMGGAATICSAIVSAAK;ASANMDLMR;DEVPYLR;EKEDDVPQFTSAGENFDK;ETLNISGPPLK;FAEIIEK;GITFDSGGISIK;GLVLGIYSK;GSDEPPVFLEIHYK;GSPNANEPPLVFVGK;GVLFASGQNLAR;LFEASIETGDR;LILADALCYAHTFNPK;LRETLNISGPPLK;MPLFEHYTR;QLMETPANEMTPTR;QVVDCQLADVNNIGK;SAGACTAAAFLK;SWIEEQAMGSFLSVAK;TEVHIRPK;TIQVDNTDAEGR	1;1;1;1;1;1;1;1;1;1;1;1;1;1;1;1;1;1;1;1;1;1;1;1	24	55	0.526	460456;460453;672848;30814;518177;518191;518195;518189;526379;526384;136470;136471;136474;80843;660454;660675;660456;660453;226041;226046;226042;226047;62008;242393;242380;242384;107565;107564;485151;485138;485114;430584;263185;263191;266017;586908;382310;382302;382303;382308;382306;241528;241533;241522;478641;507719;225166;225185;225206;225212;560193;122384;122382;122383;313445	-	Cytosol aminopeptidase OS=Homo sapiens GN=LAP3 PE=1 SV=3
2248_1	sp|P62910|RL32_HUMAN	27.8339	0	15849.8	AAQLAIR;AAQLAIRVTNPNAR;FLVHNVK;GQILMPNIGYGSNK;HMLPSGFR;SYCAEIAHNVSSK;VTNPNAR	1;1;1;1;1;1;1	7	30	0.4148	18132;18166;18141;413884;65405;65403;65400;65406;412144;420784;412127;412133;104635;104628;104637;397897;397906;397901;397911;397902;397919;397889;397907;398558;397880;397892;29321;29322;29319;29320	-	60S ribosomal protein L32 OS=Homo sapiens GN=RPL32 PE=1 SV=2
5486_1	sp|Q8WWP7|GIMA1_HUMAN	12.2323	0.000204499	34347.6	FTAQDQQAVR;SATGNSILGQR	1;1	2	2	0.0686	222609;184746	-	GTPase IMAP family member 1 OS=Homo sapiens GN=GIMAP1 PE=1 SV=1
8286_1	sp|Q9NZL4|HPBP1_HUMAN	26.8799	0.000204499	39448.5	ALFAISCLVR;ECREPELGLEELLR;EQEAGLLQFLR;LDGFSVLMR;SAFLLQNLLVGHPEHK;YLEAGAAGLR	1;1;1;1;1;1	6	12	0.1934	213637;213635;213628;542667;304614;149452;157175;157188;569228;569232;142319;142305	-	Hsp70-binding protein 1 OS=Homo sapiens GN=HSPBP1 PE=1 SV=1
3560_1	sp|O95379|TFIP8_HUMAN	9.62437	0.000204499	22988.9	NLAVQAQK;NNQFNQDELALMEK	1;1	2	2	0.1111	72564;518083	-	Tumor necrosis factor alpha-induced protein 8 OS=Homo sapiens GN=TNFAIP8 PE=1 SV=1
7035_1	sp|Q13148|TADBP_HUMAN	36.3255	0	44711.3	FGGNPGGFGNQGGFGNSR;FTEYETQVK;GISVHISNAEPK;HMIDGR;KMDETDASSAVK;NPVSQCMR;QSQDEPLR;TSDLIVLGLPWK	1;1;1;1;1;1;1;1	8	17	0.2053	534472;534471;534477;534473;535122;210313;274862;274870;12962;291494;300430;127787;127788;127791;127789;118661;327171	-	TAR DNA-binding protein 43 OS=Homo sapiens GN=TARDBP PE=1 SV=1
4213_1	sp|Q9Y5S1|TRPV2_HUMAN	6.11616	0.00351617	85926.1	LLVENGANVHAR	1	1	1	0.0157	297902	-	Transient receptor potential cation channel subfamily V member 2 OS=Homo sapiens GN=TRPV2 PE=1 SV=1
4012_1	sp|Q96FC7|PHIPL_HUMAN	7.48263	0.000765111	42459	ISNITCDSFK;TCNISVGR	1;1	2	2	0.0479	236070;88203	-	Phytanoyl-CoA hydroxylase-interacting protein-like OS=Homo sapiens GN=PHYHIPL PE=1 SV=3
4884_1	sp|Q9BT78|CSN4_HUMAN	97.5018	0	46239.7	AIQLSGAEQLEALK;ASLLQNESTNEQLQIHYK;AVIEHNLLSASK;EIYHFTLEK;HALHCTILASAGQQR;IASQMITEGR;ISQTAPEWTAQAMEAQMAQ;LYLEDDDPVQAEAYINR;MLATLFK;MLATLFKDER;NAAQVLVGIPLETGQK;QDLAQLMNSSGSHK;QHLASIYEKEEDWR;QIQSLCFQVNNLLEK;QLLTDFCTHLPNLPDSTAK;TIVHESER;TIVHESERLEALK;VISFEEQVASIR;YNELSYK	1;1;1;1;1;1;1;1;1;1;1;1;1;1;1;1;1;1;1	19	60	0.5764	400950;400952;400949;400936;401413;678774;678441;678437;679117;678440;678445;678447;291816;291800;291771;291797;292216;232979;232978;232975;502244;502245;502222;502198;502211;502201;195664;671605;650682;650668;49816;49817;57078;258730;267341;267340;489172;489165;489174;489179;489175;489543;424989;569490;570100;569493;582046;582043;693181;693172;693199;117889;430137;347534;347531;347535;347552;347…	-	COP9 signalosome complex subunit 4 OS=Homo sapiens GN=COPS4 PE=1 SV=1
5029_1	sp|Q00613|HSF1_HUMAN	7.97969	0.000581846	57224.7	QLNMYGFR;VVHIEQGGLVKPER	1;1	2	3	0.0416	145711;449338;449340	-	Heat shock factor protein 1 OS=Homo sapiens GN=HSF1 PE=1 SV=1
3381_1	sp|Q9BYN0|SRXN1_HUMAN	14.9678	0.000204499	14250.4	GAQGGDYFYSFGGCHR;LVQSTLSDLR;YAAYQQLQR	1;1;1	3	6	0.2555	558612;558613;202668;202665;208240;208249	-	Sulfiredoxin-1 OS=Homo sapiens GN=SRXN1 PE=1 SV=2
4856_1	sp|Q9UBB9|TFP11_HUMAN	45.204	0	96758.4	AVSSNVGAYMQPGAR;DKFNEALDIMNR;ENIAYLTHTER;GIGVAASSVPMNFK;GVVFVQGEK;HNVPDDGLPLQSQQLPQSGK;LILQPWK;NAQGIINPIEAK;NIVTQWQPR;SLLENDQLLSHGGQDLSADAFHR;SMFSDQVLAHPSVK	1;1;1;1;1;1;1;1;1;1;1	11	12	0.1744	420737;397988;329741;347471;114412;689328;83569;283969;208882;770551;770532;441693	-	Tuftelin-interacting protein 11 OS=Homo sapiens GN=TFIP11 PE=1 SV=1
252_2	sp|Q14839|CHD4_HUMAN	65.8252	0	217867	AAYLNMSEDPSHPSMALNTR;AYVSLFMR;CTCPALK;HLCEPGADGAETFADGVPR;IEENSLKEEESIEGEK;IGVMSLIR;KLERPPETPTVDPTVK;LKADVFK;LLEQALVIEEQLR;QHVLTR;TEEPMETEPK;TVQTAVFLYSLYK;TYEIWHR;VAQYVVR;VGGNIEVLGFNAR;VLIFSQMTK;VLNGYSLQHK;YAILNEPFKGEMNR;YGMPPQDAFTTQWLVR	1;0;1;1;1;1;1;0;0;1;1;1;1;0;1;0;1;1;1	14	22	0.1145	702175;702544;125227;61782;642682;593089;80175;80174;571122;48807;445688;22281;22280;239513;435045;134737;54984;329293;329876;164124;219598;512349;512378;611710;611708;611702;612536	-	Chromodomain-helicase-DNA-binding protein 4 OS=Homo sapiens GN=CHD4 PE=1 SV=2
252_1	sp|Q12873|CHD3_HUMAN	6.92351	0.00151143	226450	AYVSLFMR;IINHSVDKK;LKADVFK;LLEQALVIEEQLR;VAQYVVR;VGGNIEVLGFNTR;VLIFSQMTK	0;1;0;0;0;1;0	2	4	0.033	125227;157366;157359;157369;48807;445688;54984;346939;164124	-	Chromodomain-helicase-DNA-binding protein 3 OS=Homo sapiens GN=CHD3 PE=1 SV=3
1360_1	sp|Q8N983|RM43_HUMAN	22.5759	0.000204499	23416.2	FLASVLHNGLGR;LADQSGLDVIR;SVEEISTLVQK;VVAEYLNGAVR;YVQQLQR	1;1;1;1;1	5	7	0.2419	292765;237332;263196;239846;100441;100458;100438	-	39S ribosomal protein L43, mitochondrial OS=Homo sapiens GN=MRPL43 PE=1 SV=1
473_1	sp|Q9NRN7|ADPPT_HUMAN	26.2564	0.000204499	35753.1	FTNKEWETIR;GSIPEFFHIMK;HQDVPSQDDSKPTQR;IDEHHFVAVALR;IGQFVFAR;LNIPWNHIR	1;1;1;1;1;1	6	12	0.2104	316731;305598;315289;540202;540219;364907;364937;101809;101810;101806;101805;222257	-	L-aminoadipate-semialdehyde dehydrogenase-phosphopantetheinyl transferase OS=Homo sapiens GN=AASDHPPT PE=1 SV=2
4638_1	sp|P48651|PTSS1_HUMAN	6.8937	0.00151143	55491.1	ILFIGGITAPTVR;QYYAYLTDTQCK	1;1	2	2	0.0529	336518;445810	-	Phosphatidylserine synthase 1 OS=Homo sapiens GN=PTDSS1 PE=1 SV=1
4485_1	sp|Q96Q05|TPPC9_HUMAN	14.3331	0.000204499	128449	LYGDFLSWK;TLEAVLNFK;TSGSTVEVIPALPR	1;1;1	3	3	0.0279	200283;148561;376245	-	Trafficking protein particle complex subunit 9 OS=Homo sapiens GN=TRAPPC9 PE=1 SV=2
3256_1	sp|P30154|2AAB_HUMAN	41.5517	0	66171.5	DCEAEVR;DKAVESLR;ELVSDTNQHVK;ETIIMNQILPYIK;FGTEWAQNTIVPK;IGPILDTNALQGEVKPVLQK;KLSTIALALGVER;LASGDWFTSR;LNIISNLDCVNEVIGIR;LSTIALALGVER;QMLPIVLK;SEIVPLFTSLASDEQDSVR;TSACGLFSVCYPR;VLELDSVK;VLVMANDPNYLHR	0;0;1;1;1;1;0;1;0;0;1;1;0;1;1	9	14	0.2879	76148;93565;93534;284339;456776;466139;411535;683094;683298;344051;344052;207558;207565;623374;269569;269573;269572;269567;269571;269570;269562;269564;269568;103418;671979;671988;426598;426597;86312;439729;439736	-	Serine/threonine-protein phosphatase 2A 65 kDa regulatory subunit A beta isoform OS=Homo sapiens GN=PPP2R1B PE=1 SV=3
8480_1	sp|Q14696|MESD_HUMAN	5.33835	0.0057133	26060.3	AIFMLR;DGSYAWEIKDFLVGQDR	1;1	2	4	0.0983	21406;21407;21410;642807	-	LDLR chaperone MESD OS=Homo sapiens GN=MESDC2 PE=1 SV=2
3528_1	sp|P82932|RT06_HUMAN	19.207	0.000204499	14217.6	AMQRPETAATLK;ECEGIVPVPLAEK;ISAHSQQHNR;TIEALMDRGAIVR;YELALILK	1;1;1;1;1	5	5	0.448	312293;383806;231518;386225;114525	-	28S ribosomal protein S6, mitochondrial OS=Homo sapiens GN=MRPS6 PE=1 SV=3
5315_1	sp|Q7Z478|DHX29_HUMAN	45.5325	0	155139	AAGFSSSTTSTSWEGNR;AQVHPSSVNR;IIGVINEHKK;ISAVSLANR;IYSFNSTNDSSGPANLDK;TSLLTLEDVKQELIK;VLIDSVLR;VVVVAGETGSGK;YLHLAAK;YQEYIPVQTGAHADLNPFYQK	1;1;1;1;1;1;1;1;1;1	10	14	0.0928	543649;543632;179187;214974;214977;214978;214975;98369;619087;536802;92164;184211;46068;762639	-	ATP-dependent RNA helicase DHX29 OS=Homo sapiens GN=DHX29 PE=1 SV=2
7748_1	sp|Q9P2Q2|FRM4A_HUMAN	7.31808	0.000765111	115387	ATSAALPQSQR;EFAIQSQITEAAR	1;1	2	2	0.0231	201228;397115	-	FERM domain-containing protein 4A OS=Homo sapiens GN=FRMD4A PE=1 SV=3
7930_1	sp|Q96T60|PNKP_HUMAN	30.9862	0	57040.5	DTLGSWQR;EMTDSSHIPVSDMVMYGYR;LVIFTNQMSIGR;SGPLCLPESR;VAGFDLDGTLITTR;VAIDNTNPDAASR;VFPTGPSDWR;YVQCAR	1;1;1;1;1;1;1;1	8	10	0.1766	114222;705928;357584;191525;191539;405784;405796;328487;221094;38529	-	Bifunctional polynucleotide phosphatase/kinase OS=Homo sapiens GN=PNKP PE=1 SV=1
8289_1	sp|Q92608|DOCK2_HUMAN	77.1855	0	211812	AFFTEEYVR;ALEYVFK;DILLPVITK;DVFSISTLVCSTK;ISSSPTHSLYVFVR;LFESINNLMK;LTQNVGLLGLLK;MKPQLLQENLEK;MLVGDIIQIR;NKPVPDQIINFYK;QTVISENYLVR;SFIHIK;SSSSVGGLSVSSR;TLFSQLYEGK;TTILLQVAALK;VAVPIEDMQR;VQSMNEIVQSNLFK;VVFTDLGNK	1;1;1;1;1;1;1;1;1;1;1;1;1;1;1;1;1;1	18	18	0.1055	221083;71351;138180;392901;466096;250796;284112;400911;219141;457208;315521;18852;251229;236744;227490;218759;488177;128610	-	Dedicator of cytokinesis protein 2 OS=Homo sapiens GN=DOCK2 PE=1 SV=2
2304_1	sp|O00483|NDUA4_HUMAN	19.3714	0.000204499	9363.91	FYSVNVDYSK;LALFNPDVCWDR;LGPNDQYK;NNPEPWNK;QIIGQAK	1;1;1;1;1	5	14	0.5556	257725;257714;257728;257731;257734;419642;419650;100277;100266;100271;131558;131560;23877;23900	-	Cytochrome c oxidase subunit NDUFA4 OS=Homo sapiens GN=NDUFA4 PE=1 SV=1
5634_1	sp|Q9UK22|FBX2_HUMAN	6.11616	0.00351617	33306.8	VLAALPAAELVQACR	1	1	3	0.0507	459844;459833;459828	-	F-box only protein 2 OS=Homo sapiens GN=FBXO2 PE=1 SV=2
7294_1	sp|Q5VTL8|PR38B_HUMAN	11.5281	0.000204499	64429.2	AGGGCVMTIGEMLR;ALGFMYIR;VQLYELK	1;1;1	3	4	0.0531	390222;117935;81357;81353	-	Pre-mRNA-splicing factor 38B OS=Homo sapiens GN=PRPF38B PE=1 SV=1
2193_1	sp|Q9BVP2|GNL3_HUMAN	8.88043	0.00039093	61954.4	SMQVVPLDK;SSIINSLK;VGVIGFPNVGK	1;1;1	3	3	0.051	140447;67826;174262	-	Guanine nucleotide-binding protein-like 3 OS=Homo sapiens GN=GNL3 PE=1 SV=2
7740_1	sp|O43325|LYRM1_HUMAN	14.3841	0.000204499	14272.7	KWQATSGQMEDTIK;QEVLGLYR;QYILNEAR	1;1;1	3	5	0.2459	480852;480848;121401;121405;135632	-	LYR motif-containing protein 1 OS=Homo sapiens GN=LYRM1 PE=2 SV=1
3441_1	sp|Q8NBS9|TXND5_HUMAN	70.1221	0	47598.7	ALAPTWEQLALGLEHSETVK;EFPGLAGVK;EYVESQLQR;FVLSQAK;FYAPWCGHCK;GYPTLLLFR;GYPTLLWFR;IAEVDCTAER;KEFPGLAGVK;LFKPGQEAVK;LQPTWNDLGDK;LQPTWNDLGDKYNSMEDAK;TLAPTWEELSK;TLAPTWEELSKK;VDCTAHSDVCSAQGVR;VDCTQHYELCSGNQVR	1;1;1;1;1;1;1;1;1;1;1;1;1;1;1;1	16	35	0.3611	699211;93560;93563;215312;215326;215144;215351;37131;37114;317616;170180;170173;170175;170182;216113;222467;152846;152847;192330;294262;708085;707697;707696;707695;287308;287310;287304;361998;362004;362002;551095;551098;551094;632425;632428	-	Thioredoxin domain-containing protein 5 OS=Homo sapiens GN=TXNDC5 PE=1 SV=2
6167_1	sp|P41091|IF2G_HUMAN	87.1623	0	51077.2	AGGEAGVTLGQPHLSR;AISGVHTVR;HILILQNK;IVLTNPVCTEVGEK;IVSLFAEHNDLQYAAPGGLIGVGTK;LDDPSCPRPECYR;LGYANAK;LIGWGQIR;LTPLSHEVISR;NEVLMVNIGSLSTGGR;QATINIGTIGHVAHGK;QDLTTLDVTK;RGVTIKPTVDDD;SCGSSTPDEFPTDIPGTK;SFDVNKPGCEVDDLKGGVAGGSILK;VGQEIEVRPGIVSK;YNIEVVCEYIVK;YNIEVVCEYIVKK	1;1;1;1;1;1;1;1;1;1;1;1;1;1;1;1;1;1	18	58	0.4979	443888;443893;443864;102502;121917;121916;121918;448210;448215;448230;448213;448229;448220;448729;779244;779245;779246;503030;503032;16544;16527;16543;103768;103765;274922;274916;274913;274917;274915;274910;502207;502205;493445;477917;478459;477910;477905;477907;477906;477931;204159;311612;605931;605930;777923;777921;777929;777918;777927;778071;422676;422674;422677;422675;423287;432109;432931;498…	-	Eukaryotic translation initiation factor 2 subunit 3 OS=Homo sapiens GN=EIF2S3 PE=1 SV=3
243_10	sp|Q01082|SPTB2_HUMAN	632.382	0	274439	AELFTQSCADLDK;AKDEQSAVSMLK;ALQFLK;ALVADSHPESER;AQQDKLNTR;AQTLPTSVVTITSESSPGK;AQTLPTSVVTITSESSPGKR;DALLLWCQMK;DALLSALSIQNYHLECNETK;DASVAEAWLLGQEPYLSSR;DGMAFNALIHK;DLDDFQSWLSR;DLTSVMR;DLTSVNILLK;DLTSVNILLKK;DLVAIEAK;DMGEMVTQGQTDAQYMFLR;DVAEEIANYRPTLDTLHEQASALPQEHAESPDVR;DVEDEILWVGER;DVSSVELLMNNHQGIK;EAEKLESEHPDQAQAILSR;EASLGEASK;EAVCEVALDYK;EAVCEVALDYKK;EGEDMIAEEHFGSEK;EGMQLISEKPETEAVVK;EIEELQSQAQA…	1;1;0;1;1;1;1;0;1;1;1;1;1;0;0;1;1;1;1;1;1;1;1;1;1;1;1;1;1;1;1;1;1;1;1;0;1;1;1;1;1;1;1;1;0;1;1;0;1;1;1;1;1;1;0;0;1;1;0;1;1;1;1;1;1;1;1;1;1;1;0;1;1;1;1;1;1;0;1;1;0;1;1;1;1;1;1;1;1;1;1;1;1;1;1;1;1;1;1;1;1;1;1;1;1;1;1;1;1;1;1;1;1;1;1;1;1;1;1;1;1;1;1;1;1;0;0;1;1;1;1;0;1;1;1;1;1;1;1;0;1	124	472	0.6396	415012;316249;9641;9647;308445;308453;166705;166709;608707;661734;661731;661735;661732;661739;661729;661733;661737;289342;730787;731022;730788;730784;730772;730785;731010;730771;731025;671732;671729;671724;671982;255339;255338;255345;255323;255337;262931;255330;262933;262935;349977;349979;349978;349981;48933;191854;270303;270883;66471;66467;706670;706666;706672;711416;706669;877419;877440;877418;…	-	Spectrin beta chain, non-erythrocytic 1 OS=Homo sapiens GN=SPTBN1 PE=1 SV=2
4911_1	sp|Q9BXR6|FHR5_HUMAN	12.0235	0.000204499	64377.1	AMISSPPFR;HSVCINGK;ITCTEEGWSPTPK;LQGSVTVTCR;MCSFPFVK	1;1;0;1;1	4	5	0.0844	135235;91908;91907;419594;194704;139651	-	Complement factor H-related protein 5 OS=Homo sapiens GN=CFHR5 PE=1 SV=1
6316_1	sp|Q96BH1|RNF25_HUMAN	6.11616	0.00351617	51186.7	EPLVYDLASLK	1	1	3	0.024	272648;272657;272596	-	E3 ubiquitin-protein ligase RNF25 OS=Homo sapiens GN=RNF25 PE=1 SV=1
611_1	sp|Q9BRT2|UQCC2_HUMAN	6.11616	0.00351617	14865.4	LILSTDTLEELKEIDK	1	1	1	0.127	592003	-	Ubiquinol-cytochrome-c reductase complex assembly factor 2 OS=Homo sapiens GN=UQCC2 PE=1 SV=1
7420_1	sp|Q9Y6A4|CFA20_HUMAN	16.4426	0.000204499	22760	AYGTNYIETLR;LYSEDELPAEFK;RAYGTNYIETLR;VQIHANCR	1;1;1;1	4	6	0.1658	302580;383703;383705;392929;131142;131146	-	Cilia- and flagella-associated protein 20 OS=Homo sapiens GN=CFAP20 PE=1 SV=1
2568_1	sp|P80303|NUCB2_HUMAN	28.9276	0	50164.3	ADIEEIK;LDSLQDIGMDHQALLK;LEYHQVIQQMEQK;LVTLEEFLK;QVIDVLETDKHFR;VQNIHPVESAK	1;1;1;1;1;1	6	10	0.1643	47067;566630;567030;508206;508228;508258;177752;469900;257928;257922	-	Nucleobindin-2 OS=Homo sapiens GN=NUCB2 PE=1 SV=2
2422_1	sp|Q9UL25|RAB21_HUMAN	55.9162	0	24332.3	DSNGAILVYDITDEDSFQK;FHALGPIYYR;HITTLQASFLTK;HVSIQEAESYAESVGAK;KMLGNEICLCIVGNK;MIETAQVDER;MLGNEICLCIVGNK;RVNLAIWDTAGQER;VNLAIWDTAGQER;VVLLGEGCVGK	1;1;1;1;1;1;1;1;1;1	10	39	0.48	682330;682326;682313;682329;682337;682328;682522;682336;265446;265432;265443;265415;265439;337543;337533;570119;570563;570104;570101;570581;545352;552790;240146;479717;488760;480330;479780;484156;484155;401730;401721;401724;401731;401703;402283;201922;201920;201915;201895	-	Ras-related protein Rab-21 OS=Homo sapiens GN=RAB21 PE=1 SV=3
1532_1	sp|Q92542|NICA_HUMAN	6.62706	0.00187688	78361.5	LLYGFLIK;SGAGVPAVILR	1;1	2	2	0.0268	116521;150145	-	Nicastrin OS=Homo sapiens GN=NCSTN PE=1 SV=2
7982_1	sp|P18669|PGAM1_HUMAN	63.6256	0	28785.8	ALPFWNEEIVPQIK;FSGWYDADLSPAGHEEAKR;HGESAWNLENR;HYGGLTGLNK;KAMEAVAAQGK;NLKPIKPMQFLGDEETVR;NLKPIKPMQFLGDEETVRK;SYDVPPPPMEPDHPFYSNISK;VLIAAHGNSLR;YADLTEDQLPSCESLK;YADLTEDQLPSCESLKDTIAR	1;1;1;1;1;1;1;1;1;1;1	11	43	0.5354	513521;513528;513516;683601;309492;309497;309498;309489;160422;160412;160417;194220;184741;677945;677940;678471;677946;682626;677944;678482;712692;712691;712687;712689;712682;712693;751378;751384;751383;751389;754019;751382;751387;751372;214932;214927;214925;214929;214924;214931;595563;752780;752772	-	Phosphoglycerate mutase 1 OS=Homo sapiens GN=PGAM1 PE=1 SV=2
3449_2	sp|P22897|MRC1_HUMAN	133.07	0	165905	ACIGFGGNLVSIQNEK;ALGGDLASINNK;ALGGDLASINNKEEQQTIWR;DYQYYFSK;EGWNFYSNK;EQAFLTYHMK;FEGSESLWNKDPLTSVSYQINSK;FQWHEAETYCK;FTHWNSDMPGR;GEDLFFNYGNR;GSGLWSR;GTFQWTIEEEVR;GVHYTNWGK;IFGFMEEER;IFGFMEEERK;IQMYFEWSDGTPVTFTK;IYGTTDNLCSR;KACIGFGGNLVSIQNEK;LGYICK;LITASGSYHK;NFGDLVSIQSESEKK;QFLIYNEDHKR;RNFGDLVSIQSESEK;SALTWHQAR;SCVSLNPGK;SQGPEIVEVEK;SSYSLMR;TSLCFK;YEQAFLTSFVGLRPEK;YLNWLPGSPSAEPGK	1;1;1;1;1;1;1;1;1;1;1;1;1;1;1;1;1;1;1;1;1;1;1;1;1;1;1;0;1;1	29	54	0.2074	524868;228820;228777;228815;712584;712593;190346;190343;210256;210253;283008;788452;788454;788446;788577;415524;330070;339521;330075;339516;339531;339517;321432;321441;26250;413619;161426;218543;218544;293507;293506;293511;663979;301727;301725;582423;582438;22227;168177;168195;511889;396384;397141;396382;396378;396381;526431;165173;113748;254275;58649;22707;602047;602032;477286	-	Macrophage mannose receptor 1 OS=Homo sapiens GN=MRC1 PE=1 SV=1
3449_1	sp|Q9Y217|MTMR6_HUMAN	33.9966	0	71922.2	AITVENASVLVHCSDGWDR;CSQPLSGFSAR;FQFVGIENIHVMR;FTVLEPNTVSFNFK;LQGWQLIDLAEEYKR;NMYHQFDR;TSLCFK;YLNPLYSSESHR;YMYVMDTRPK	1;1;1;1;1;1;0;1;1	8	11	0.1739	682064;682050;251076;463987;464593;463973;491381;592836;188729;22707;397974;304334	-	Myotubularin-related protein 6 OS=Homo sapiens GN=MTMR6 PE=1 SV=3
7701_1	sp|Q96T76|MMS19_HUMAN	14.9456	0.000204499	113217	FQPFQDGSSGQR;GLSHVLNR;IAALQCMHALTR;IVHDLISR;LLQAAAGASAR	1;1;1;1;1	5	7	0.0495	334135;82880;352456;109074;146011;145983;145987	-	MMS19 nucleotide excision repair protein homolog OS=Homo sapiens GN=MMS19 PE=1 SV=2
5901_1	sp|P04233|HG2A_HUMAN	27.8767	0	33493.7	DLISNNEQLPMLGR;GSFPENLR;LDKLTVTSQNLQLENLR;LTVTSQNLQLENLR;NTMETIDWK;VYPPLK	1;1;1;1;1;1	6	15	0.1824	469774;477301;469792;469802;469751;477277;477836;94087;94093;638329;484241;484248;484256;206340;8412	-	HLA class II histocompatibility antigen gamma chain OS=Homo sapiens GN=CD74 PE=1 SV=3
164_1	sp|P55083|MFAP4_HUMAN	15.6931	0.000204499	28629.9	ADGEYWLGLQNMHLLTLK;FNGSVSFFR;FSTFDR;GFYYSLK	1;1;1;1	4	16	0.1569	679116;674942;679120;674650;161394;29663;29666;29665;29670;29664;75773;75763;75761;75770;75774;75744	-	Microfibril-associated glycoprotein 4 OS=Homo sapiens GN=MFAP4 PE=1 SV=2
619_1	sp|O75153|CLU_HUMAN	162.562	0	146577	ASDAFHFFQSGQAK;AVGSISSTAFDIR;CLTQQAVALQR;DAAAFLLSCQIPGLVK;DFGGDVAAYVAPTNDLNGVR;DHYKDFGGDVAAYVAPTNDLNGVR;DWNEELQTTR;ERPLCPLQPQNR;FLENALAVSTK;FNPDIFSPGVR;GLEMDPIDCTPPEYILPGSR;HQVLNDRDEEVELCSSVECK;HYILDLLR;IATPFQVYSWTAPQAEHAMDCVR;LGYEEHIPGQTR;NFAVLQK;NGSSANIPPLK;NRPPGAADNTAWAVMTPQELWK;QELVDAFVEHR;QVSITASTR;RHQLQEASR;SEDPPGQEAGSEEEGSSASGLAK;SVEGLQEGSVLR;TGIQVLLK;TKESSEYLK;TQLGEDHEK;TVVSHPR;VALSHHLVAR…	1;1;1;1;1;1;1;1;1;1;1;1;1;1;1;1;1;1;1;1;1;1;1;1;1;1;1;1;1;1;1;1;1;1;1;1	36	65	0.3254	439103;439101;439102;316785;316800;295009;523140;659334;783357;783370;296967;420854;241173;241174;273088;273075;716728;716755;756280;151286;151282;796928;794897;360070;360087;48356;48378;181732;757372;757367;327496;114396;114789;197602;706141;706138;706142;287355;73072;73080;73069;73067;172532;158686;158683;38076;184296;184295;184297;230282;230280;230281;58014;58016;430486;430473;439650;48360;358…	-	Clustered mitochondria protein homolog OS=Homo sapiens GN=CLUH PE=1 SV=2
3446_1	sp|Q6PD74|AAGAB_HUMAN	6.11616	0.00351617	34571.9	SGLDSVSSWLPLAK	1	1	1	0.0444	394808	-	Alpha- and gamma-adaptin-binding protein p34 OS=Homo sapiens GN=AAGAB PE=1 SV=1
865_1	sp|Q9BZV1|UBXN6_HUMAN	47.0642	0	49722.9	AAGAEPDSILKPELLSAIEK;AWGPTSQDTIR;EEGSAHLAVPGVYFTCPLTGATLR;HKEQLLAAEPVR;IYTFNK;IYTFNKDQDR;LGAVYGFVR;LGVDTIAK;LPDGCLLQGTFYAR;YLDNIHLHPEEEK	1;1;1;1;1;1;1;1;1;1	10	17	0.2744	659723;659724;262359;262347;262343;774874;774850;355277;355284;34103;301775;123249;46743;474746;474739;488088;488105	-	UBX domain-containing protein 6 OS=Homo sapiens GN=UBXN6 PE=1 SV=1
5575_1	sp|Q92896|GSLG1_HUMAN	64.9016	0	134464	AKDDSELEGQVISCLK;ALNEACESVIQTACK;GEIEHHCSGLHR;HHCAAITPGR;IIIQESALDYR;IQVSELCK;LIAQDYK;LSSDCEDQIR;MTAIIFSDYR;NDINILK;QITQNTDYR;QMSCLMEALEDKR;STITEIKECADEPVGK;VAELSSDDFHLDR;VAPADGFSDLAMQVMTSPSK	1;1;1;1;1;1;1;1;1;1;1;1;1;1;1	15	27	0.1501	564488;518086;518701;378542;378549;378547;194092;194094;194093;194090;194096;194108;314999;120877;62449;62495;62491;258090;255277;255282;52282;207089;474616;557936;418507;418497;659607	-	Golgi apparatus protein 1 OS=Homo sapiens GN=GLG1 PE=1 SV=2
4933_2	sp|O00410|IPO5_HUMAN	144.993	0	123550	AKLEEHFK;ATAAFILANEHNVALFK;EFQQYLPVVMGPLMK;EGFVEYTEQVVK;EHIMQMLQNPDWK;ELKEGFVEYTEQVVK;ENVNATENCISAVGK;FLFDSVSSQNVGLR;FYFHDGVR;HIVENAVQK;HLHSIMVLK;IFSIIAEGEMHEAIK;ITFLLQAIR;KQAEETYENIPGQSK;LCGDTSLNNMQR;LMVPLLK;LQELIQK;LVLPMIK;MLVQCMQDQEHPSIR;NLIDEDGNNQWPEGLK;QMAAVLLR;RQDEDYDEQVEESLQDEDDNDVYILTK;STACQMLVCYAK;TIECISLIGLAVGK;TKENVNATENCISAVGK;VAAAESMPLLLECAR;VCDIAAELAR;VIAALLQTMEDQGNQR;VQAHAAAALINFTE…	1;1;1;0;1;1;1;1;1;1;1;1;1;1;1;0;1;1;1;1;1;1;1;1;1;1;1;1;1;1;1;1;1	31	92	0.35	133131;580109;580110;580107;580672;581068;566616;376596;377029;505551;567036;472135;452908;452893;452911;452876;452874;453430;452905;452904;452882;453320;453419;150256;149507;168822;515469;515461;515454;515449;167337;167335;167332;167336;167333;532424;365685;365692;365691;45323;45324;45318;52619;45316;52618;45321;72950;72959;72868;45322;45314;45326;45325;45319;596530;596528;602815;584891;584888;5…	-	Importin-5 OS=Homo sapiens GN=IPO5 PE=1 SV=4
6257_1	sp|Q5JPH6|SYEM_HUMAN	39.6128	0	58651.6	DVLNPVYVER;FAPSPTGFLHLGGLR;GGPAGPYQQSQR;GSEWLVSTAK;HEVASVEGDPVIMK;LEDTDQTR;TALYNYIFAK;TGAAYPCFCSPQR;VLGLLER	1;1;1;1;1;1;1;1;1	9	13	0.1893	247622;453511;453586;453646;271082;271085;168631;422453;121130;247648;424377;39989;39991	-	Probable glutamate--tRNA ligase, mitochondrial OS=Homo sapiens GN=EARS2 PE=1 SV=2
6682_1	sp|Q9Y5N5|HEMK2_HUMAN	15.3127	0.000204499	22885.8	GLFYLVTIK;QAGQETLSVLK;VHIQPVITDLVK	1;1;1	3	5	0.1495	157421;157423;229479;338988;338986	-	HemK methyltransferase family member 2 OS=Homo sapiens GN=N6AMT1 PE=1 SV=3
5145_1	sp|P28370|SMCA1_HUMAN	18.8561	0.000204499	122527	APFHQLR;ESELTDEDITTILER;FDWFIK;FIFMLSTR;HGATHVFASK;IQYGTSK;IYLGLSK;LDSIVIQQGR;LFELLEK;LLNILMQLR;LRLDSIVIQQGR;NPDIPNPALAQR;VLIFSQMTR	0;1;1;1;0;1;1;0;0;0;0;1;0	6	8	0.1034	70977;552242;64859;64860;64863;139264;157667;157676;38606;37484;200490;81091;191321;359326;359327;305724;188965	-	Probable global transcription activator SNF2L1 OS=Homo sapiens GN=SMARCA1 PE=1 SV=2
5145_2	sp|O60264|SMCA5_HUMAN	23.0148	0.000204499	121828	APFHQLR;ATNVCTR;EILFYR;ESEITDEDIDGILER;FVFMLSTR;HGATHVFASK;LDSIVIQQGR;LFELLEK;LLNILMQLR;LRLDSIVIQQGR;QNLLSVGDYR;RCNTLITLIER;VLIFSQMTR	0;1;1;1;1;0;0;0;0;0;1;1;0	6	6	0.1055	70977;48867;57416;538452;132496;157667;157676;200490;81091;191321;359326;359327;223634;354177;188965	-	SWI/SNF-related matrix-associated actin-dependent regulator of chromatin subfamily A member 5 OS=Homo sapiens GN=SMARCA5 PE=1 SV=1
2149_1	sp|Q9H4E7|DEFI6_HUMAN	4.9299	0.00905673	73864.3	HWNVQMNR;KLQELELLQEAQR	1;1	2	2	0.0333	172431;469361	-	Differentially expressed in FDCP 6 homolog OS=Homo sapiens GN=DEF6 PE=1 SV=1
8000_1	sp|O75792|RNH2A_HUMAN	7.17368	0.0011422	33373.9	ADALYPVVSAASICAK;DLSELER;LADLEALK	1;1;1	3	3	0.1037	487719;67596;73372	-	Ribonuclease H2 subunit A OS=Homo sapiens GN=RNASEH2A PE=1 SV=2
927_1	sp|Q9UNE7|CHIP_HUMAN	46.3637	0	34834.2	ALCYLK;EPCITPSGITYDRK;IHQESELHSYLSR;ISFELMR;KYPEAAACYGR;LNFGDDIPSALR;NHEGDEDDSHVR;NPLVAVYYTNR;RALELDGQSVK;SPLTQEQLIPNLAMK;VGHFDPVTR	1;1;1;1;1;1;1;1;1;1;1	11	33	0.3993	27864;488110;488099;469115;469117;469123;469140;469106;469103;469107;469133;469104;469655;469129;469659;82699;82703;82708;293449;293452;293451;293458;312801;366149;308069;308050;254985;513033;513034;521429;513026;145370;145369	-	E3 ubiquitin-protein ligase CHIP OS=Homo sapiens GN=STUB1 PE=1 SV=2
1537_2	sp|O75410|TACC1_HUMAN	8.72812	0.00039093	87740.2	AAHGCVTAVSGK;SFQQLTMEK;SLSDLFR;TIAQMIEDEQR	1;1;1;1	4	6	0.0484	218642;218649;189448;56011;56009;322493	-	Transforming acidic coiled-coil-containing protein 1 OS=Homo sapiens GN=TACC1 PE=1 SV=2
3092_1	sp|Q9UGM6|SYWM_HUMAN	42.1199	0	40121.4	AKELAYTVCQEVK;GSAAAPALQK;ITDSPEEIVQK;LAVADAVIEK;LDKDHLEK;SDPDKLATVR;STHVPVGEDQVQHMELVQDLAQGFNK;STHVPVGEDQVQHMELVQDLAQGFNKK;VLQIGSAK	1;1;1;1;1;1;1;1;1	9	17	0.2694	438239;438237;91602;91604;278230;146036;131232;183470;183458;822906;822690;834623;834624;834676;46180;46194;46185	-	Tryptophan--tRNA ligase, mitochondrial OS=Homo sapiens GN=WARS2 PE=1 SV=1
[truncated: 4,887 more rows]

## Sheet: Human_Liver_NH4HCO3_2
Supplementary Table 1: The list of proteins identified from the four human tissues in this study
[truncated: 5,717 more rows]

## Sheet: Human_Liver_TX-100_1
Supplementary Table 1: The list of proteins identified from the four human tissues in this study
[truncated: 6,480 more rows]

[truncated: 8 more sheets: Human_Liver_TX-100_2, Human_Colon_TX-100_1, Human_Colon_TX-100_2, Human_Kidney_TX-100_1, Human_Kidney_TX-100_2, Human_Bladder_TX-100_1, Human_Bladder_TX-100_2, Sheet1]
